# Supplementary material for: A robust and facile method for desulfonation to amines
Source: Royal Society of Chemistry journal article supplement (doi:10.1039/d1qo01190a), 2021-01-01
Supplement: d1qo01190a1.pdf [file d1qo01190a1.pdf]

**A robust and facile method for desulfonation to amines**

Chen Li,<sup>1, #</sup> Yilei Huang,<sup>1, #</sup> Sheng Cao,<sup>1, #</sup> Yunhao Luo,<sup>1</sup> Ying Zhang,<sup>1</sup> Guang Yang<sup>1, \*</sup>

<sup>1</sup> The State Key Laboratory of Medicinal Chemical Biology, College of Pharmacy, Nankai University, Tianjin, 300071, P. R. China.

# These authors contributed equally to this work

## Contents of supporting information

|                                                                       |     |
|-----------------------------------------------------------------------|-----|
| 1. General Information.....                                           | 3   |
| 2. List of Abbreviations.....                                         | 4   |
| 3. General Procedure for Synthesis of Sulfamides.....                 | 5   |
| 4. General Procedure for Eliminating the Sulfamides.....              | 6   |
| 5. Synthesis of Substrates.....                                       | 7   |
| 6. Mass analysis of intermediates.....                                | 33  |
| 7. NMR Spectrums of Compounds.....                                    | 34  |
| 8. Deprotection of N-Ts-L-Proline causes racemization of product..... | 139 |
| 9. Controlled reactions for mechanism study.....                      | 140 |

## 1. General Information

All reactions were carried out under an argon atmosphere with dry, freshly distilled solvents under anhydrous conditions, unless otherwise noted. Yields refer to chromatographically and spectroscopically ( $^1\text{H}$  NMR) homogeneous materials, unless otherwise stated. The used solvents were purified and dried according to common procedures. Other chemicals and solvents were commercially available. High-resolution mass spectra (HRMS) were obtained with a FTICR-MS (Ion spec 7.0T) spectrometer.  $^1\text{H}$  NMR spectra were obtained by using a Bruker AV 400 or AV 600. Chemical shifts are reported in parts per million (ppm) relative to either a tetramethylsilane internal standard or solvent signals. Data are reported as follows: chemical shift, multiplicity (s = singlet, d = doublet, t = triplet, q = quartet, br = broad, m = multiplet), coupling constants and integration.  $^{13}\text{C}$  NMR spectra were recorded using a Bruker AV 400 spectrometer (100 MHz) using  $\text{CDCl}_3$  as the solvent. Chemical shifts ( $\delta$ ) are reported in parts per million measured relative to the solvent peak. IR spectra were recorded with a Bio-Rad FTS 6000 Fourier infrared spectrometer.

## 2. List of Abbreviations

TEA - triethylamine

TBAHS - tetra(n-butyl)ammonium hydrogensulfate

HPPh<sub>2</sub> - diphenylphosphane

Ts - P-toluenesulfonyl

### 3. General Procedure for Synthesis of Sulfamides

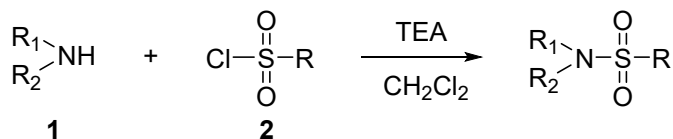

**General Procedure A:** A secondary amine (**1**, 5 mmol, 1.0 eq) in 25 mL round bottom flask equipped with a magnetic stir bar is dissolved in 10 mL CH<sub>2</sub>Cl<sub>2</sub>. A CH<sub>2</sub>Cl<sub>2</sub> solution (2 mL) of sulfonyl chloride (**2**, 5 mmol, 1.0 eq) is then added at 0°C, followed by a slight excess of TEA (1 mL, 1.4 eq) and the reaction is stirred 4h at room temperature. The solvent is evaporated off and the reaction mixture is extracted with 1 N HCl solution and ethyl acetate. The combined organic phase was dried over Na<sub>2</sub>SO<sub>4</sub>, and concentrated in *vacuo*. The residue was purified by flash column chromatography on silica gel to afford the corresponding sulfonamide.

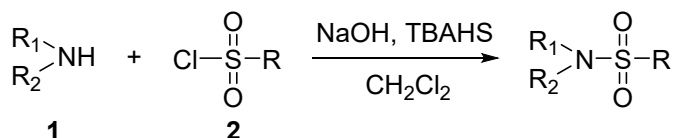

**General Procedure B:** A secondary amine (**1**, 5 mmol, 1.0 eq) in 25 mL round bottom flask equipped with a magnetic stir bar is dissolved in 10 mL CH<sub>2</sub>Cl<sub>2</sub>, sodium hydroxide (5 mmol, 1.0 eq) was added followed by TBAHS (0.25 mmol, 0.05 eq). A CH<sub>2</sub>Cl<sub>2</sub> solution (2 mL) of sulfonyl chloride (**2**, 5 mmol, 1.0 eq) is then added dropwise at 0°C. After that the mixture was stirred at room temperature for further 4h, the solvent is evaporated off and the reaction mixture is extracted with 1 N HCl solution and ethyl acetate. The combined organic phase was dried over Na<sub>2</sub>SO<sub>4</sub>, and concentrated in *vacuo*. The residue was purified by flash column chromatography on silica gel to afford the the desired product.

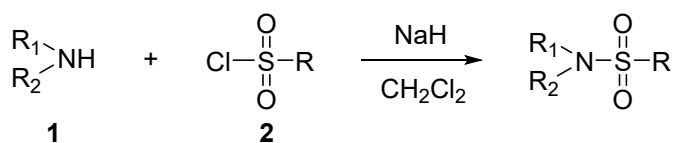

**General Procedure C:** To a suspension of sodium hydride (60% dispersion in mineral oil, 6 mmol, 1.2 eq) in anhydrous CH<sub>2</sub>Cl<sub>2</sub> (5 mL), a solution of the secondary amine (**1**, 5 mmol, 1.0 eq) was added and the mixture was stirred at 0°C for 1h. To the mixture was added a solution of sulfonyl chloride (**2**, 5 mmol, 1.0 eq) in anhydrous CH<sub>2</sub>Cl<sub>2</sub> (3 mL) and the mixture was stirred at room temperature for 6h. The reaction was quenched with water (10 mL) and the resulting precipitate was collected by suction filtration, washed with 1 N HCl solution, the combined organic phase was dried over Na<sub>2</sub>SO<sub>4</sub> and concentrated in *vacuo*. The residue was purified by flash column chromatography on silica gel to afford the the desired product.

#### 4. General Procedure for Eliminating the Sulfamides

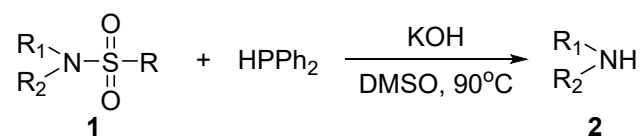

To a solution of sulfamide (**1**, 1 mmol, 1.0 eq) in DMSO (8 mL), potassium hydroxide (2.5 mmol, 2.5 eq) was added and the mixture was sealed under an argon atmosphere. After that HPPh<sub>2</sub> (1.1 mmol, 1.1 eq) was injected into the system, and the mixture was stirred at 90°C for 1h. At first, with the addition of HPPh<sub>2</sub> the KOH solid became yellow from white, during the process, the system became yellow gradually and finally red. The reaction was quenched with water (10 mL) and the resulting precipitate was extracted with water and ethyl acetate, the combined organic phase was dried over Na<sub>2</sub>SO<sub>4</sub> and concentrated in *vacuo*. The residue was purified by neutral alumina column to afford the amine.

## 5. Synthesis of Substrates

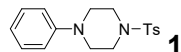

### 1-phenyl-4-tosylpiperazine **1**

**1** was prepared according to the general procedure **A**, and purified by chromatography on silica gel (petroleum ether: ethyl acetate = 5:1) to furnish the desired compound **1** (89 % yield) as a white solid. m. p. 195.5-197.1 °C; IR (KBr)  $\nu_{\text{max}}$ : 2888, 2361, 1597, 1347, 1170, 963, 734, 544  $\text{cm}^{-1}$ .  $^1\text{H}$  NMR (400 MHz, Chloroform-*d*)  $\delta$  7.71 – 7.61 (m, 2H), 7.41 – 7.29 (m, 2H), 7.26 – 7.22 (m, 2H), 7.03 – 6.65 (m, 3H), 3.23 (dd,  $J = 6.3, 3.4$  Hz, 4H), 3.15 (dd,  $J = 6.3, 3.3$  Hz, 4H), 2.43 (s, 3H).  $^{13}\text{C}$  NMR (100 MHz, Chloroform-*d*)  $\delta$  150.7, 143.8, 132.5, 129.8, 129.2, 127.9, 120.8, 116.9, 49.2, 46.1, 21.5. HRMS (ESI) calculated for  $\text{C}_{17}\text{H}_{20}\text{N}_2\text{NaO}_2\text{S}^+$   $[\text{M}+\text{Na}]^+$ : 339.1138, found 339.1141.

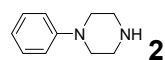

### 1-phenylpiperazine **2**

**2** was prepared according to the general procedure, and purified by neutral alumina column ( $\text{CH}_2\text{Cl}_2$ : MeOH = 20:1) to furnish the desired compound **2** as colorless oil. IR (KBr)  $\nu_{\text{max}}$ : 3272, 3061, 3025, 2944, 2910, 2881, 2823, 1596, 1497, 1451, 1322, 1235, 1146, 1127, 990, 761, 692  $\text{cm}^{-1}$ .  $^1\text{H}$  NMR (400 MHz, Chloroform-*d*)  $\delta$  7.29 – 7.19 (m, 2H), 6.92 – 6.72 (m, 3H), 3.10 – 3.02 (m, 4H), 3.00 – 2.86 (m, 4H), 1.68 (s, 1H).  $^{13}\text{C}$  NMR (100 MHz, Chloroform-*d*)  $\delta$  151.9, 129.1, 119.6, 116.1, 50.4, 46.2. HRMS (ESI) calculated for  $\text{C}_{10}\text{H}_{14}\text{N}_2\text{Na}^+$   $[\text{M}+\text{Na}]^+$ : 185.1049, found 185.1051.

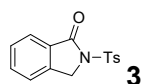

### 2-tosylisoindolin-1-one **3**

**3** was prepared according to the general procedure **C**, and purified by chromatography on silica gel (petroleum ether: ethyl acetate = 4:1) to furnish the desired compound **3** (71 % yield) as a white solid. m. p. 216.2-218.1 °C; IR (KBr)  $\nu_{\text{max}}$ : 2932, 1924, 1724, 1655, 1594, 1509, 1469, 1450, 1363, 1289, 1220, 1130, 1019, 891, 817, 751, 702, 664  $\text{cm}^{-1}$ .  $^1\text{H}$  NMR (400 MHz, Chloroform-*d*)  $\delta$  8.09 – 7.99 (m, 2H), 7.87 – 7.77 (m, 1H), 7.64 (td,  $J = 7.6, 1.2$  Hz, 1H), 7.54 – 7.43 (m, 2H), 7.39 – 7.29 (m, 2H), 4.92 (s, 2H), 2.42 (s, 3H).  $^{13}\text{C}$  NMR (100 MHz, Chloroform-*d*)  $\delta$  166.1, 145.2, 141.0, 135.4, 133.9, 130.2, 129.8, 128.8, 128.2, 125.1, 123.4, 49.9, 21.7. HRMS (ESI) calculated for  $\text{C}_{15}\text{H}_{13}\text{NNaO}_3\text{S}^+$   $[\text{M}+\text{Na}]^+$ : 310.0508, found 310.0506.

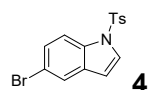

### 5-bromo-1-tosyl-1H-indole **4**

**4** was prepared according to the general procedure **B**, and purified by chromatography on silica gel (petroleum ether: ethyl acetate = 5:1) to furnish the desired compound **4** (89 % yield) as a pink solid. m. p. 136.3-138.4 °C; IR (KBr)  $\nu_{\text{max}}$ : 1438, 1373, 1168, 1129  $\text{cm}^{-1}$ .  $^1\text{H}$  NMR (400 MHz, Chloroform-*d*)  $\delta$  7.85 (dd,  $J = 8.8, 2.1$  Hz, 1H), 7.72 (dd,  $J = 8.4, 2.2$  Hz, 2H), 7.64 (d,  $J = 2.1$  Hz, 1H), 7.55 (dd,  $J = 3.8, 2.2$  Hz, 1H), 7.38 (dt,  $J = 8.8, 2.1$  Hz, 1H), 7.20 (dd,  $J = 8.4, 2.1$  Hz, 2H), 6.57 (t,  $J = 2.9$  Hz, 1H), 2.32 (d,  $J = 2.2$  Hz, 3H).  $^{13}\text{C}$  NMR (100 MHz, Chloroform-*d*)  $\delta$  145.3, 135.0, 133.6, 132.5, 130.0, 127.6, 127.5, 126.8, 124.1, 116.8, 115.0, 108.3, 21.6. HRMS (ESI) calculated for  $\text{C}_{15}\text{H}_{12}\text{BrNNaO}_2\text{S}^+$   $[\text{M}+\text{Na}]^+$ : 371.9664, found 371.9663.

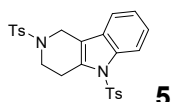

#### 2,3,4,5-tetrahydro-1H-pyrido[4,3-b]indole **5**

**5** was prepared according to the general procedure **B** with 2.2 eq TsCl, and purified by chromatography on silica gel (petroleum ether: ethyl acetate = 5:1) to furnish the desired compound **5** (82 % yield) as a white solid. m. p. 159.7-161.1 °C; IR (KBr)  $\nu_{\text{max}}$ : 2914, 2844, 2361, 1596, 1381, 1151, 1098, 756, 657, 542  $\text{cm}^{-1}$ .  $^1\text{H}$  NMR (400 MHz, Chloroform-*d*)  $\delta$  8.10 – 8.04 (m, 1H), 7.70 (dd,  $J = 13.0, 8.2$  Hz, 4H), 7.30 (dd,  $J = 7.9, 5.9$  Hz, 4H), 7.22 (dd,  $J = 7.9, 3.5$  Hz, 3H), 4.65 (d,  $J = 1.9$  Hz, 2H), 3.46 (t,  $J = 5.7$  Hz, 2H), 2.73 (td,  $J = 5.5, 2.8$  Hz, 2H), 2.41 (s, 3H), 2.34 (s, 3H).  $^{13}\text{C}$  NMR (100 MHz, Chloroform-*d*)  $\delta$  145.1, 143.8, 136.0, 135.4, 134.4, 130.1, 129.8, 129.1, 127.5, 126.5, 124.8, 123.6, 118.4, 116.7, 114.3, 44.8, 42.9, 21.6, 21.5, 21.4. HRMS (ESI) calculated for  $\text{C}_{25}\text{H}_{24}\text{N}_2\text{NaO}_4\text{S}_2^+$   $[\text{M}+\text{Na}]^+$ : 503.1070, found 503.1073.

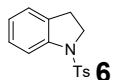

#### 1-tosylindoline **6**

**6** was prepared according to the general procedure **B**, and purified by chromatography on silica gel (petroleum ether: ethyl acetate = 6:1) to furnish the desired compound **6** (93 % yield) as a white solid. m. p. 99.5-101.2 °C; IR (KBr)  $\nu_{\text{max}}$ : 3392, 3031, 2936, 2874, 2853, 1601, 1508, 1460, 1308, 1237, 1153, 1090, 975, 754, 711, 659  $\text{cm}^{-1}$ .  $^1\text{H}$  NMR (400 MHz, Chloroform-*d*)  $\delta$  7.65 (dd,  $J = 11.5, 8.1$  Hz, 3H), 7.30 – 7.13 (m, 3H), 7.06 (d,  $J = 7.4$  Hz, 1H), 6.96 (t,  $J = 7.4$  Hz, 1H), 3.89 (t,  $J = 8.4$  Hz, 2H), 2.86 (t,  $J = 8.4$  Hz, 2H), 2.35 (s, 3H).  $^{13}\text{C}$  NMR (100 MHz, Chloroform-*d*)  $\delta$  144.1, 142.0, 133.9, 131.8, 129.7, 127.7, 127.3, 125.2, 123.7, 115.0, 50.0, 27.9, 21.6. HRMS (ESI) calculated for  $\text{C}_{15}\text{H}_{15}\text{NNaO}_2\text{S}^+$   $[\text{M}+\text{Na}]^+$ : 296.0716, found 296.0715.

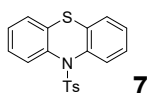

#### 10-tosyl-10H-phenothiazine **7**



**7** was prepared according to the general procedure **C**, and purified by chromatography on silica gel (petroleum ether: ethyl acetate = 25:1) to furnish the desired compound **7** (81 % yield) as a yellow solid. m. p. 120.7-122.5 °C; IR (KBr)  $\nu_{\text{max}}$ : 3448, 1637, 1462, 1359, 1307, 1185, 735, 576  $\text{cm}^{-1}$ .  $^1\text{H}$  NMR (400 MHz,  $\text{DMSO-}d_6$ )  $\delta$  7.74 (dd,  $J = 8.0, 1.4$  Hz, 2H), 7.33 (td,  $J = 7.7, 1.5$  Hz, 2H), 7.22 (td,  $J = 7.6, 1.4$  Hz, 2H), 7.18 – 7.08 (m, 4H), 7.05 (d,  $J = 8.1$  Hz, 2H), 2.38 (s, 3H).  $^{13}\text{C}$  NMR (100 MHz,  $\text{DMSO-}d_6$ )  $\delta$  144.1, 136.1, 135.9, 133.1, 130.0, 129.3, 127.7, 127.6, 127.2, 126.9, 21.7. HRMS (ESI) calculated for  $\text{C}_{19}\text{H}_{15}\text{NNaO}_2\text{S}_2^+$   $[\text{M}+\text{Na}]^+$ : 376.0442, found 376.0440.

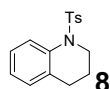

#### 1-tosyl-1,2,3,4-tetrahydroquinoline **8**

**8** was prepared according to the general procedure **B**, and purified by chromatography on silica gel (petroleum ether: ethyl acetate = 6:1) to furnish the desired compound **8** (82 % yield) as a white solid. m. p. 94.8-96.2 °C; IR (KBr)  $\nu_{\text{max}}$ : 3000, 2900, 2850, 1580, 1480, 1330  $\text{cm}^{-1}$ .  $^1\text{H}$  NMR (400 MHz, Chloroform- $d$ )  $\delta$  7.79 (dd,  $J = 8.3, 1.2$  Hz, 1H), 7.53 – 7.42 (m, 2H), 7.18 (dd,  $J = 7.2, 4.8$  Hz, 3H), 7.07 (td,  $J = 7.4, 1.3$  Hz, 1H), 7.00 (dd,  $J = 7.6, 1.6$  Hz, 1H), 3.86 – 3.73 (m, 2H), 2.44 (t,  $J = 6.6$  Hz, 2H), 2.37 (s, 3H), 1.66 – 1.60 (m, 2H).  $^{13}\text{C}$  NMR (100 MHz, Chloroform- $d$ )  $\delta$  143.5, 136.9, 136.8, 130.7, 129.6, 129.1, 127.1, 126.5, 125.0, 124.9, 46.5, 29.7, 26.6, 21.6. HRMS (ESI) calculated for  $\text{C}_{16}\text{H}_{17}\text{NNaO}_2\text{S}^+$   $[\text{M}+\text{Na}]^+$ : 310.0872, found 310.0869.

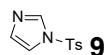

#### 1-tosyl-1H-imidazole **9**

**9** was prepared according to the general procedure **C**, and purified by chromatography on silica gel (petroleum ether: ethyl acetate = 1:1) to furnish the desired compound **9** (61 % yield) as a white solid. m. p. 76.1-78.3 °C; IR (KBr)  $\nu_{\text{max}}$ : 1385, 1198, 1181, 1065  $\text{cm}^{-1}$ .  $^1\text{H}$  NMR (400 MHz,  $\text{DMSO-}d_6$ )  $\delta$  7.39 (d,  $J = 1.3$  Hz, 1H), 7.05 (d,  $J = 8.1$  Hz, 2H), 6.68 (t,  $J = 1.5$  Hz, 1H), 6.53 (d,  $J = 8.2$  Hz, 2H), 6.21 (d,  $J = 1.6$  Hz, 1H), 1.51 (s, 3H).  $^{13}\text{C}$  NMR (100 MHz,  $\text{DMSO-}d_6$ )  $\delta$  146.0, 136.3, 133.9, 129.5, 129.4, 126.5, 117.1, 19.5. HRMS (ESI) calculated for  $\text{C}_{10}\text{H}_{10}\text{N}_2\text{NaO}_2\text{S}^+$   $[\text{M}+\text{Na}]^+$ : 245.0355, found 245.0357.

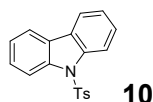

#### 9-tosyl-9H-carbazole **10**

**10** was prepared according to the general procedure **C**, and purified by chromatography on silica gel (petroleum ether: ethyl acetate = 8:1) to furnish the desired compound **10** (54 % yield) as a white solid. m. p. 128.9-130.1 °C; IR (KBr)  $\nu_{\text{max}}$ : 3401, 2919, 1591, 1431, 1371  $\text{cm}^{-1}$ .  $^1\text{H}$  NMR (400 MHz,  $\text{DMSO-}d_6$ )  $\delta$  7.51 (dt,  $J = 8.5, 0.9$  Hz, 2H), 7.18 (dt,  $J = 7.7, 1.0$  Hz, 2H), 6.89 – 6.83 (m, 2H), 6.71 (ddd,  $J = 8.5, 7.3, 1.3$  Hz, 2H), 6.58 (td,  $J = 7.5, 1.0$  Hz, 2H), 6.38 – 6.33 (m, 2H), 1.45 (s, 3H).  $^{13}\text{C}$  NMR (100 MHz,  $\text{DMSO-}d_6$ )  $\delta$  144.6, 137.6, 133.7,

128.5, 126.3, 125.7, 125.3, 123.1, 119.0, 114.1, 19.2. HRMS (ESI) calculated for  $C_{19}H_{15}NNaO_2S^+$   $[M+Na]^+$ : 344.0716, found 344.0716.

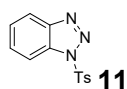

#### 1-tosyl-1H-benzo[d][1,2,3]triazole **11**

**11** was prepared according to the general procedure **A**, and purified by chromatography on silica gel (petroleum ether: ethyl acetate = 4:1) to furnish the desired compound **11** (75 % yield) as a white solid. m. p. 129.2-131.0 °C; IR (KBr)  $\nu_{max}$ : 3061, 2593, 2277, 1967, 1791, 1653, 1510, 1452, 1444, 1392, 1137, 1093, 960, 905, 771, 677, 585  $cm^{-1}$ .  $^1H$  NMR (400 MHz, Chloroform-*d*)  $\delta$  8.11 (d,  $J$  = 8.3 Hz, 1H), 8.05 (d,  $J$  = 8.3 Hz, 1H), 8.03 – 7.92 (m, 2H), 7.65 (ddd,  $J$  = 8.3, 7.0, 1.0 Hz, 1H), 7.46 (td,  $J$  = 7.6, 1.0 Hz, 1H), 7.32 (s, 2H), 2.37 (s, 3H).  $^{13}C$  NMR (100 MHz, Chloroform-*d*)  $\delta$  146.8, 145.4, 134.0, 131.6, 130.3, 130.3, 127.9, 125.9, 120.5, 112.0, 21.7. HRMS (ESI) calculated for  $C_{13}H_{11}N_3NaO_2S^+$   $[M+Na]^+$ : 296.0464, found 296.0466.

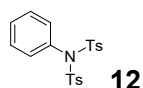

#### 4-methyl-*N*-phenyl-*N*-tosylbenzenesulfonamide **12**

**12** was prepared according to the general procedure **A** with 2.2 eq TsCl, and purified by chromatography on silica gel (petroleum ether: ethyl acetate = 10:1) to furnish the desired compound **12** (81 % yield) as a white solid. m. p. 167.6-168.3 °C; IR (KBr)  $\nu_{max}$ : 3394, 3066, 1487, 1381  $cm^{-1}$ .  $^1H$  NMR (400 MHz, Chloroform-*d*)  $\delta$  7.81 (d,  $J$  = 8.3 Hz, 4H), 7.45 – 7.41 (m, 1H), 7.34 (dd,  $J$  = 11.4, 7.9 Hz, 6H), 7.03 (dd,  $J$  = 7.5, 1.7 Hz, 2H), 2.46 (s, 6H).  $^{13}C$  NMR (100 MHz, Chloroform-*d*)  $\delta$  145.0, 136.7, 134.4, 131.6, 130.2, 129.6, 129.2, 128.6, 21.7. HRMS (ESI) calculated for  $C_{20}H_{19}NNaO_4S_2^+$   $[M+Na]^+$ : 424.0648, found 424.0645.

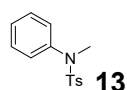

#### *N*,4-dimethyl-*N*-phenylbenzenesulfonamide **13**

**13** was prepared according to the general procedure **A**, and purified by chromatography on silica gel (petroleum ether: ethyl acetate = 10:1) to furnish the desired compound **13** (89 % yield) as a white solid. m. p. 91.2-93.2 °C; IR (KBr)  $\nu_{max}$ : 3130, 2915, 1595, 1491, 1341, 1170, 1063, 868  $cm^{-1}$ .  $^1H$  NMR (400 MHz, Chloroform-*d*)  $\delta$  7.42 (d,  $J$  = 7.9 Hz, 2H), 7.27 (dt,  $J$  = 17.8, 7.4 Hz, 5H), 7.15 – 6.98 (m, 2H), 3.16 (s, 3H), 2.41 (s, 3H).  $^{13}C$  NMR (100 MHz, Chloroform-*d*)  $\delta$  143.6, 141.6, 133.4, 129.4, 128.8, 127.9, 127.3, 126.6, 38.1, 21.6. HRMS (ESI) calculated for  $C_{14}H_{15}NNaO_2S^+$   $[M+Na]^+$ : 284.0716, found 284.0719.

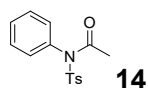

#### N-phenyl-N-tosylacetamide **14**

**14** was prepared according to the general procedure **C**, and purified by chromatography on silica gel (petroleum ether: ethyl acetate = 5:1) to furnish the desired compound **14** (44 % yield) as a white solid. m. p. 139.2-141.0 °C; IR (KBr)  $\nu_{\text{max}}$ : 3393, 2918, 1703, 1593, 1491, 1360, 1163  $\text{cm}^{-1}$ .  $^1\text{H}$  NMR (400 MHz, Chloroform-*d*)  $\delta$  8.03 – 7.76 (m, 2H), 7.55 – 7.42 (m, 3H), 7.37 – 7.31 (m, 2H), 7.29 – 7.25 (m, 2H), 2.45 (s, 3H), 1.87 (s, 3H).  $^{13}\text{C}$  NMR (100 MHz, Chloroform-*d*)  $\delta$  170.1, 145.0, 137.0, 136.2, 130.0, 129.9, 129.9, 129.4, 129.2, 25.1, 21.7. HRMS (ESI) calculated for  $\text{C}_{15}\text{H}_{15}\text{NNaO}_3\text{S}^+$   $[\text{M}+\text{Na}]^+$ : 312.0665, found 312.0662.

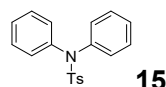

#### 4-methyl-N,N-diphenylbenzenesulfonamide **15**

**15** was prepared according to the general procedure **B**, and purified by chromatography on silica gel (petroleum ether: ethyl acetate = 15:1) to furnish the desired compound **15** (83 % yield) as a white solid. m. p. 142.4-143.1 °C; IR (KBr)  $\nu_{\text{max}}$ : 2920, 2361, 1592, 1488, 1351, 1160, 713, 580  $\text{cm}^{-1}$ .  $^1\text{H}$  NMR (400 MHz, Chloroform-*d*)  $\delta$  7.57 (d,  $J$  = 8.1 Hz, 2H), 7.42 – 7.04 (m, 12H), 2.36 (s, 3H).  $^{13}\text{C}$  NMR (100 MHz, Chloroform-*d*)  $\delta$  143.7, 141.7, 137.7, 129.6, 129.3, 128.4, 127.8, 127.5, 21.6. HRMS (ESI) calculated for  $\text{C}_{19}\text{H}_{17}\text{NNaO}_2\text{S}^+$   $[\text{M}+\text{Na}]^+$ : 346.0872, found 346.0873.

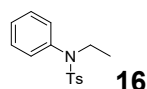

#### N-ethyl-4-methyl-N-phenylbenzenesulfonamide **16**

**16** was prepared according to the general procedure **A**, and purified by chromatography on silica gel (petroleum ether: ethyl acetate = 10:1) to furnish the desired compound **16** (91 % yield) as a white solid. m. p. 84.7-85.9 °C; IR (KBr)  $\nu_{\text{max}}$ : 2976, 2873, 2324, 2088, 1752, 1586, 1355, 1231, 1161, 961, 893, 807, 772, 698  $\text{cm}^{-1}$ .  $^1\text{H}$  NMR (400 MHz, Chloroform-*d*)  $\delta$  7.48 (dd,  $J$  = 8.3, 2.1 Hz, 2H), 7.35 – 7.18 (m, 5H), 7.13 – 6.99 (m, 2H), 3.60 (qd,  $J$  = 7.1, 1.9 Hz, 2H), 2.41 (d,  $J$  = 2.2 Hz, 3H), 1.06 (td,  $J$  = 7.2, 1.9 Hz, 3H).  $^{13}\text{C}$  NMR (100 MHz, Chloroform-*d*)  $\delta$  143.2, 138.9, 135.5, 129.4, 128.9, 127.8, 127.7, 45.5, 29.7, 21.5, 14.0. HRMS (ESI) calculated for  $\text{C}_{15}\text{H}_{17}\text{NNaO}_2\text{S}^+$   $[\text{M}+\text{Na}]^+$ : 298.0872, found 298.0874.

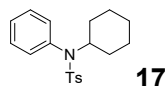

#### N-cyclohexyl-4-methyl-N-phenylbenzenesulfonamide **17**

**17** was prepared according to the general procedure **A**, and purified by chromatography on silica gel (petroleum ether: ethyl acetate = 10:1) to furnish the desired compound **17** (86 % yield) as a white solid. m. p. 141.3-142.7 °C; IR (KBr)  $\nu_{\text{max}}$ : 3038, 2912, 2243, 2107, 1802, 1589, 1346, 1167, 1071, 912, 876, 822, 759  $\text{cm}^{-1}$ .  $^1\text{H}$  NMR (400 MHz, Chloroform-*d*)  $\delta$  7.61 (d,  $J$  = 7.8 Hz, 2H), 7.34 – 7.22 (m, 5H), 7.02 (d,  $J$  = 7.2 Hz, 2H), 4.15 (tt,  $J$  = 12.3, 3.9 Hz, 1H), 2.41 (s, 3H), 1.83 (d,  $J$  = 12.3 Hz, 2H), 1.70 (d,  $J$  = 13.2 Hz, 2H), 1.52 (d,  $J$  = 13.7 Hz,

1H), 1.39 – 1.27 (m, 2H), 1.04 (qd,  $J = 12.5, 3.5$  Hz, 2H), 0.83 (tdd,  $J = 13.2, 9.3, 3.8$  Hz, 1H).  $^{13}\text{C}$  NMR (100 MHz, Chloroform- $d$ )  $\delta$  142.8, 138.9, 135.8, 132.5, 129.4, 128.6, 128.5, 127.3, 59.1, 32.8, 26.0, 25.1, 21.5. HRMS (ESI) calculated for  $\text{C}_{19}\text{H}_{23}\text{NNaO}_2\text{S}^+$   $[\text{M}+\text{Na}]^+$ : 352.1342, found 352.1344.

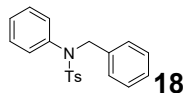

#### *N*-benzyl-4-methyl-*N*-phenylbenzenesulfonamide **18**

**18** was prepared according to the general procedure **A**, and purified by chromatography on silica gel (petroleum ether: ethyl acetate = 5:1) to furnish the desired compound **18** (81 % yield) as a white solid. m. p. 139.2-140.7 °C; IR (KBr)  $\nu_{\text{max}}$ : 3065, 3033, 2923, 1594, 1457, 1345, 1166  $\text{cm}^{-1}$ .  $^1\text{H}$  NMR (400 MHz, Chloroform- $d$ )  $\delta$  7.53 (dd,  $J = 8.4, 2.0$  Hz, 2H), 7.30 – 7.10 (m, 10H), 6.98 (dd,  $J = 6.2, 3.5$  Hz, 2H), 4.72 (s, 2H), 2.40 (s, 3H).  $^{13}\text{C}$  NMR (100 MHz, Chloroform- $d$ )  $\delta$  143.6, 139.1, 136.1, 135.7, 129.6, 129.0, 128.9, 128.5, 128.4, 127.8, 127.8, 127.6, 54.8, 21.6. HRMS (ESI) calculated for  $\text{C}_{20}\text{H}_{19}\text{NNaO}_2\text{S}^+$   $[\text{M}+\text{Na}]^+$ : 360.1029, found 369.1026.

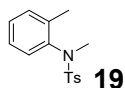

#### *N*,4-dimethyl-*N*-(*o*-tolyl)benzenesulfonamide **19**

**19** was prepared according to the general procedure **A**, and purified by chromatography on silica gel (petroleum ether: ethyl acetate = 10:1) to furnish the desired compound **19** (89 % yield) as a white solid. m. p. 68.8-70.3 °C; IR (KBr)  $\nu_{\text{max}}$ : 2922, 2361, 1493, 1306, 1154, 789, 574  $\text{cm}^{-1}$ .  $^1\text{H}$  NMR (400 MHz, Chloroform- $d$ )  $\delta$  7.63 – 7.41 (m, 2H), 7.33 – 7.25 (m, 3H), 7.19 (td,  $J = 7.5, 1.3$  Hz, 1H), 7.04 (td,  $J = 7.5, 1.6$  Hz, 1H), 6.60 (dd,  $J = 7.9, 1.3$  Hz, 1H), 3.12 (s, 3H), 2.44 (s, 3H), 2.40 (s, 3H).  $^{13}\text{C}$  NMR (100 MHz, Chloroform- $d$ )  $\delta$  143.5, 140.5, 139.0, 135.2, 131.4, 129.5, 128.2, 128.1, 127.0, 126.4, 38.9, 21.6, 18.4. HRMS (ESI) calculated for  $\text{C}_{15}\text{H}_{17}\text{NNaO}_2\text{S}^+$   $[\text{M}+\text{Na}]^+$ : 298.0872, found 298.0871.

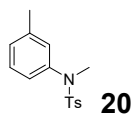

#### *N*,4-dimethyl-*N*-(*m*-tolyl)benzenesulfonamide **20**

**20** was prepared according to the general procedure **A**, and purified by chromatography on silica gel (petroleum ether: ethyl acetate = 10:1) to furnish the desired compound **20** (86 % yield) as a colorless oil. IR (KBr)  $\nu_{\text{max}}$ : 3640, 2923, 2361, 1924, 1602, 1349, 1168, 998, 808, 548  $\text{cm}^{-1}$ .  $^1\text{H}$  NMR (400 MHz, Chloroform- $d$ )  $\delta$  7.44 – 7.36 (m, 2H), 7.17 (s, 2H), 7.09 (t,  $J = 7.8$  Hz, 1H), 7.00 (d,  $J = 7.7$  Hz, 1H), 6.94 (d,  $J = 1.9$  Hz, 1H), 6.81 (dt,  $J = 8.0, 1.4$  Hz, 1H), 3.09 (s, 3H), 2.33 (s, 3H), 2.23 (s, 3H).  $^{13}\text{C}$  NMR (100 MHz, Chloroform- $d$ )  $\delta$  143.6, 141.6, 138.6, 133.6, 129.3, 128.6, 128.0, 127.8, 127.4, 123.2, 38.1, 21.4, 21.2. HRMS (ESI) calculated for  $\text{C}_{15}\text{H}_{17}\text{NNaO}_2\text{S}^+$   $[\text{M}+\text{Na}]^+$ : 298.0872, found 298.0874.

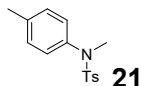

***N*,4-dimethyl-*N*-(*p*-tolyl)benzenesulfonamide **21****

**21** was prepared according to the general procedure **A**, and purified by chromatography on silica gel (petroleum ether: ethyl acetate = 10:1) to furnish the desired compound **21** (87 % yield) as a white solid. m. p. 59.7-60.5 °C; IR (KBr)  $\nu_{\text{max}}$ : 2980, 2924, 1343, 1171  $\text{cm}^{-1}$ .  $^1\text{H}$  NMR (400 MHz, Chloroform-*d*)  $\delta$  7.47 – 7.34 (m, 2H), 7.19 (s, 2H), 7.06 (d,  $J$  = 8.2 Hz, 2H), 7.01 – 6.92 (m, 2H), 3.11 (s, 3H), 2.37 (s, 3H), 2.29 (s, 3H).  $^{13}\text{C}$  NMR (100 MHz, Chloroform-*d*)  $\delta$  143.5, 139.0, 137.2, 133.6, 129.5, 129.4, 127.9, 126.5, 38.2, 21.5, 21.0. HRMS (ESI) calculated for  $\text{C}_{15}\text{H}_{17}\text{NNaO}_2\text{S}^+$  [ $\text{M}+\text{Na}$ ] $^+$ : 298.0872, found 298.0872.

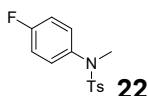

***N*-(4-fluorophenyl)-*N*,4-dimethylbenzenesulfonamide **22****

**22** was prepared according to the general procedure **A**, and purified by chromatography on silica gel (petroleum ether: ethyl acetate = 10:1) to furnish the desired compound **22** (77 % yield) as a white solid. m. p. 92.6-94.3 °C; IR (KBr)  $\nu_{\text{max}}$ : 1599, 1499, 1344, 1188, 1064, 874  $\text{cm}^{-1}$ .  $^1\text{H}$  NMR (400 MHz, Chloroform-*d*)  $\delta$  7.48 – 7.34 (m, 2H), 7.24 (d,  $J$  = 8.1 Hz, 2H), 7.16 – 7.00 (m, 2H), 7.01 – 6.79 (m, 2H), 3.12 (s, 3H), 2.40 (s, 3H).  $^{13}\text{C}$  NMR (100 MHz, Chloroform-*d*)  $\delta$  143.8, 137.6, 133.2, 129.5, 128.5, 127.8, 115.8, 115.5, 38.2, 21.5.  $^{19}\text{F}$  NMR (376 MHz, Chloroform-*d*)  $\delta$  -114.0. HRMS (ESI) calculated for  $\text{C}_{14}\text{H}_{14}\text{FNNaO}_2\text{S}^+$  [ $\text{M}+\text{Na}$ ] $^+$ : 302.0621, found 302.0622.

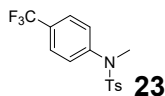

***N*,4-dimethyl-*N*-(4-(trifluoromethyl)phenyl)benzenesulfonamide **23****

**23** was prepared according to the general procedure **A**, and purified by chromatography on silica gel (petroleum ether: ethyl acetate = 10:1) to furnish the desired compound **23** (81 % yield) as a white solid. m. p. 70.7-72.1 °C; IR (KBr)  $\nu_{\text{max}}$ : 3068, 2925, 1928, 1615, 1334, 1113, 871, 711, 546  $\text{cm}^{-1}$ .  $^1\text{H}$  NMR (400 MHz, Chloroform-*d*)  $\delta$  7.56 (d,  $J$  = 8.6 Hz, 2H), 7.49 – 7.34 (m, 2H), 7.34 – 7.07 (m, 4H), 3.18 (s, 3H), 2.41 (s, 3H).  $^{13}\text{C}$  NMR (100 MHz, Chloroform-*d*)  $\delta$  144.9, 144.1, 133.2, 129.6, 129.0, 128.7, 127.7, 126.2, 125.9 (d,  $J$  = 3.4 Hz), 37.7, 21.5.  $^{19}\text{F}$  NMR (376 MHz, Chloroform-*d*)  $\delta$  -62.4. HRMS (ESI) calculated for  $\text{C}_{15}\text{H}_{14}\text{F}_3\text{NNaO}_2\text{S}^+$  [ $\text{M}+\text{Na}$ ] $^+$ : 352.0590, found 352.0593.

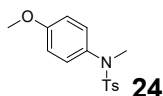

***N*-(4-methoxyphenyl)-*N*,4-dimethylbenzenesulfonamide **24****

**24** was prepared according to the general procedure **A**, and purified by chromatography on silica gel (petroleum ether: ethyl acetate = 10:1) to furnish the desired compound **24**

(84 % yield) as a white solid. m. p. 68.6-69.9 °C; IR (KBr)  $\nu_{\text{max}}$ : 1610, 1596, 1587, 1511, 1346, 1247, 1169, 1115  $\text{cm}^{-1}$ .  $^1\text{H}$  NMR (400 MHz, Chloroform-*d*)  $\delta$  7.55 – 7.33 (m, 2H), 7.20 (s, 2H), 7.04 – 6.90 (m, 2H), 6.86 – 6.67 (m, 2H), 3.71 (d,  $J$  = 1.4 Hz, 3H), 3.09 (s, 3H), 2.36 (s, 3H).  $^{13}\text{C}$  NMR (100 MHz, Chloroform-*d*)  $\delta$  158.6, 143.5, 134.2, 133.5, 129.4, 127.9, 127.8, 113.9, 55.3, 38.3, 21.4. HRMS (ESI) calculated for  $\text{C}_{15}\text{H}_{17}\text{NNaO}_3\text{S}^+$  [ $\text{M}+\text{Na}$ ] $^+$ : 314.0821, found 314.0825.

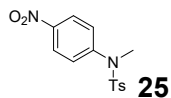

#### *N*,4-dimethyl-*N*-(4-nitrophenyl)benzenesulfonamide **25**

**25** was prepared according to the general procedure **A**, and purified by chromatography on silica gel (petroleum ether: ethyl acetate = 8:1) to furnish the desired compound **25** (74 % yield) as a yellow solid. m. p. 167.1-168.7 °C; IR (KBr)  $\nu_{\text{max}}$ : 3365, 2998, 2362, 1594, 1447, 1347, 1167, 871, 693, 502  $\text{cm}^{-1}$ .  $^1\text{H}$  NMR (400 MHz, Chloroform-*d*)  $\delta$  8.23 – 8.11 (m, 2H), 7.48 – 7.39 (m, 2H), 7.39 – 7.31 (m, 2H), 7.26 (d,  $J$  = 8.1 Hz, 2H), 3.22 (s, 3H), 2.42 (s, 3H).  $^{13}\text{C}$  NMR (100 MHz, Chloroform-*d*)  $\delta$  147.4, 144.4, 133.1, 129.7, 127.6, 125.6, 124.3, 37.5, 29.7, 21.6. HRMS (ESI) calculated for  $\text{C}_{14}\text{H}_{14}\text{N}_2\text{NaO}_4\text{S}^+$  [ $\text{M}+\text{Na}$ ] $^+$ : 329.0566, found 329.0563.

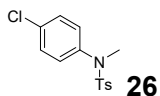

#### *N*-(4-chlorophenyl)-*N*,4-dimethylbenzenesulfonamide **26**

**26** was prepared according to the general procedure **A**, and purified by chromatography on silica gel (petroleum ether: ethyl acetate = 10:1) to furnish the desired compound **26** (81 % yield) as a white solid. m. p. 89.5-91.2 °C; IR (KBr)  $\nu_{\text{max}}$ : 2978, 1596, 1487, 1343, 1155, 881, 714, 611, 506  $\text{cm}^{-1}$ .  $^1\text{H}$  NMR (400 MHz, Chloroform-*d*)  $\delta$  7.45 – 7.34 (m, 2H), 7.34 – 7.13 (m, 4H), 7.09 – 6.92 (m, 2H), 3.10 (s, 3H), 2.37 (s, 3H).  $^{13}\text{C}$  NMR (100 MHz, Chloroform-*d*)  $\delta$  143.9, 140.2, 133.1, 132.7, 129.5, 128.9, 127.8, 37.9, 21.5. HRMS (ESI) calculated for  $\text{C}_{14}\text{H}_{14}\text{ClNNaO}_2\text{S}^+$  [ $\text{M}+\text{Na}$ ] $^+$ : 318.0326, found 318.0329.

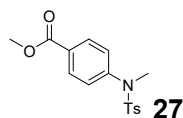

#### methyl 4-((*N*,4-dimethylphenyl)sulfonamido)benzoate **27**

**27** was prepared according to the general procedure **A**, and purified by chromatography on silica gel (petroleum ether: ethyl acetate = 10:1) to furnish the desired compound **27** (92 % yield) as a white solid. m. p. 105.2-107.1 °C; IR (KBr)  $\nu_{\text{max}}$ : 2955, 1719, 1600, 1152, 1103, 1054, 878, 721, 550  $\text{cm}^{-1}$ .  $^1\text{H}$  NMR (400 MHz, Chloroform-*d*)  $\delta$  8.09 – 7.86 (m, 2H), 7.39 (dt,  $J$  = 7.7, 2.2 Hz, 2H), 7.30 – 7.13 (m, 4H), 3.91 (q,  $J$  = 2.2 Hz, 3H), 3.19 (q,  $J$  = 2.0 Hz, 3H), 2.40 (q,  $J$  = 2.2 Hz, 3H).  $^{13}\text{C}$  NMR (100 MHz, Chloroform-*d*)  $\delta$  166.3, 145.7, 144.0, 133.1, 130.2, 129.5, 128.3, 127.7, 125.5, 52.2, 37.6, 21.5. HRMS (ESI) calculated for  $\text{C}_{16}\text{H}_{17}\text{NNaO}_4\text{S}^+$  [ $\text{M}+\text{Na}$ ] $^+$ : 342.0776, found 342.0773.

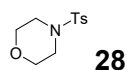

#### 4-tosylmorpholine **28**

**28** was prepared according to the general procedure **A**, and purified by chromatography on silica gel (petroleum ether: ethyl acetate = 2:1) to furnish the desired compound **28** (84 % yield) as a white solid. m. p. 148.9-150.7 °C; IR (KBr)  $\nu_{\text{max}}$ : 2853, 1453, 1346, 1165, 1114, 941, 815, 734, 545  $\text{cm}^{-1}$ .  $^1\text{H}$  NMR (400 MHz, Chloroform-*d*)  $\delta$  7.78 – 7.53 (m, 2H), 7.34 (d,  $J$  = 7.9 Hz, 2H), 3.79 – 3.64 (m, 4H), 3.06 – 2.90 (m, 4H), 2.43 (s, 3H).  $^{13}\text{C}$  NMR (100 MHz, Chloroform-*d*)  $\delta$  143.9, 132.0, 129.7, 127.8, 66.0, 46.0, 21.5. HRMS (ESI) calculated for  $\text{C}_{11}\text{H}_{15}\text{NNaO}_3\text{S}^+$   $[\text{M}+\text{Na}]^+$ : 264.0665, found 264.0663.

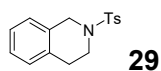

#### 2-tosyl-1,2,3,4-tetrahydroisoquinoline **29**

**29** was prepared according to the general procedure **A**, and purified by chromatography on silica gel (petroleum ether: ethyl acetate = 5:1) to furnish the desired compound **29** (88 % yield) as a white solid. m. p. 143.7-145.3 °C; IR (KBr)  $\nu_{\text{max}}$ : 2935, 2861, 2822, 2361, 1594, 1339, 1165, 951, 735, 545  $\text{cm}^{-1}$ .  $^1\text{H}$  NMR (400 MHz, DMSO-*d*<sub>6</sub>)  $\delta$  7.72 (d,  $J$  = 7.9 Hz, 2H), 7.43 (d,  $J$  = 7.9 Hz, 2H), 7.25 – 6.89 (m, 4H), 4.16 (s, 2H), 3.25 (t,  $J$  = 6.0 Hz, 2H), 2.82 (d,  $J$  = 6.1 Hz, 2H), 2.38 (s, 3H).  $^{13}\text{C}$  NMR (100 MHz, DMSO-*d*<sub>6</sub>)  $\delta$  144.0, 133.4, 133.4, 132.0, 130.3, 129.1, 127.9, 127.1, 126.8, 126.5, 47.7, 44.0, 28.5, 21.4. HRMS (ESI) calculated for  $\text{C}_{16}\text{H}_{17}\text{NNaO}_2\text{S}^+$   $[\text{M}+\text{Na}]^+$ : 310.0872, found 310.0875.

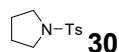

#### 1-tosylpyrrolidine **30**

**30** was prepared according to the general procedure **A**, and purified by chromatography on silica gel (petroleum ether: ethyl acetate = 3:1) to furnish the desired compound **30** (88 % yield) as a white solid. m. p. 120.8-121.6 °C; IR (KBr)  $\nu_{\text{max}}$ : 2983, 1468, 1333, 1155, 816, 695, 549  $\text{cm}^{-1}$ .  $^1\text{H}$  NMR (400 MHz, Chloroform-*d*)  $\delta$  7.83 – 7.65 (m, 2H), 7.32 (d,  $J$  = 8.0 Hz, 2H), 3.39 – 3.11 (m, 4H), 2.43 (s, 3H), 1.92 – 1.63 (m, 4H).  $^{13}\text{C}$  NMR (100 MHz, Chloroform-*d*)  $\delta$  143.3, 133.9, 129.6, 127.6, 47.9, 25.2, 21.5. HRMS (ESI) calculated for  $\text{C}_{11}\text{H}_{15}\text{NNaO}_2\text{S}^+$   $[\text{M}+\text{Na}]^+$ : 248.0716, found 248.0718.

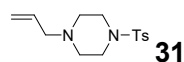

#### 1-allyl-4-tosylpiperazine **31**

**31** was prepared according to the general procedure **A**, and purified by chromatography on silica gel ( $\text{CH}_2\text{Cl}_2$ : MeOH = 25:1) to furnish the desired compound **31** (91 % yield) as a white solid. m. p. 164.7-166.3 °C; IR (KBr)  $\nu_{\text{max}}$ : 2924, 2587, 2417, 1455, 1352, 1165, 942, 730, 548  $\text{cm}^{-1}$ .  $^1\text{H}$  NMR (400 MHz, DMSO-*d*<sub>6</sub>)  $\delta$  7.62 (d,  $J$  = 8.0 Hz, 2H), 7.36 (d,  $J$  = 8.0 Hz, 2H), 6.08 (dt,  $J$  = 16.2, 8.1 Hz, 1H), 5.66 – 5.47 (m, 2H), 4.02 – 2.91 (m, 10H), 2.44 (s, 3H).

$^{13}\text{C}$  NMR (100 MHz, DMSO- $d_6$ )  $\delta$  144.8, 132.3, 130.2, 127.4, 126.2, 126.1, 59.4, 50.5, 43.1, 21.6. HRMS (ESI) calculated for  $\text{C}_{14}\text{H}_{20}\text{N}_2\text{NaO}_2\text{S}^+$   $[\text{M}+\text{Na}]^+$ : 303.1143, found 303.1141.

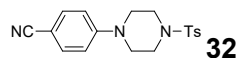

#### 4-(4-tosylpiperazin-1-yl)benzonitrile **32**

**32** was prepared according to the general procedure **A**, and purified by chromatography on silica gel (petroleum ether: ethyl acetate = 6:1) to furnish the desired compound **32** (82 % yield) as a white solid. m. p. 156.5-157.8 °C; IR (KBr)  $\nu_{\text{max}}$ : 2856, 2208, 1601, 1513, 1300, 1174, 1003, 731, 595  $\text{cm}^{-1}$ .  $^1\text{H}$  NMR (400 MHz, Chloroform- $d$ )  $\delta$  7.66 (dd,  $J$  = 8.3, 2.3 Hz, 2H), 7.45 (ddd,  $J$  = 9.0, 4.1, 1.9 Hz, 2H), 7.35 (dd,  $J$  = 8.4, 2.2 Hz, 2H), 6.96 – 6.70 (m, 2H), 3.39 (dt,  $J$  = 5.9, 2.6 Hz, 4H), 3.26 – 2.99 (m, 4H), 2.43 (d,  $J$  = 2.8 Hz, 3H).  $^{13}\text{C}$  NMR (100 MHz, Chloroform- $d$ )  $\delta$  152.8, 133.5, 144.2, 132.2, 129.9, 127.8, 119.7, 114.9, 101.2, 47.0, 45.6, 21.6. HRMS (ESI) calculated for  $\text{C}_{18}\text{H}_{19}\text{N}_3\text{NaO}_2\text{S}^+$   $[\text{M}+\text{Na}]^+$ : 364.1090, found 364.1092.

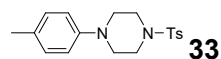

#### 1-(*p*-tolyl)-4-tosylpiperazine **33**

**33** was prepared according to the general procedure **A**, and purified by chromatography on silica gel (petroleum ether: ethyl acetate = 8:1) to furnish the desired compound **33** (87 % yield) as a white solid. m. p. 212.4-214.0 °C; IR (KBr)  $\nu_{\text{max}}$ : 2910, 2822, 2361, 1514, 1346, 1162, 948, 730, 548  $\text{cm}^{-1}$ .  $^1\text{H}$  NMR (400 MHz, Chloroform- $d$ )  $\delta$  7.78 – 7.54 (m, 2H), 7.33 (d,  $J$  = 8.0 Hz, 2H), 7.14 – 6.97 (m, 2H), 6.85 – 6.71 (m, 2H), 3.16 (p,  $J$  = 4.3, 3.6 Hz, 8H), 2.43 (s, 3H), 2.25 (s, 3H).  $^{13}\text{C}$  NMR (100 MHz, Chloroform- $d$ )  $\delta$  148.6, 143.8, 132.4, 130.4, 129.8, 129.7, 127.9, 117.2, 49.7, 46.2, 21.5, 20.5. HRMS (ESI) calculated for  $\text{C}_{18}\text{H}_{22}\text{N}_2\text{NaO}_2\text{S}^+$   $[\text{M}+\text{Na}]^+$ : 353.1294, found 353.1298.

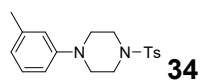

#### 1-(*m*-tolyl)-4-tosylpiperazine **34**

**34** was prepared according to the general procedure **A**, and purified by chromatography on silica gel (petroleum ether: ethyl acetate = 8:1) to furnish the desired compound **34** (82 % yield) as a white solid. m. p. 129.8-131.1 °C; IR (KBr)  $\nu_{\text{max}}$ : 2971, 2856, 2361, 1600, 1447, 1345, 1144, 954, 733, 547  $\text{cm}^{-1}$ .  $^1\text{H}$  NMR (400 MHz, Chloroform- $d$ )  $\delta$  7.66 (d,  $J$  = 8.3 Hz, 2H), 7.31 (d,  $J$  = 8.1 Hz, 2H), 7.10 (t,  $J$  = 7.7 Hz, 1H), 6.72 – 6.58 (m, 3H), 3.21 – 3.15 (m, 4H), 3.15 – 3.01 (m, 4H), 2.40 (s, 3H), 2.27 (s, 3H).  $^{13}\text{C}$  NMR (100 MHz, Chloroform- $d$ )  $\delta$  150.8, 143.9, 139.0, 132.4, 129.8, 129.1, 128.0, 121.6, 117.7, 114.0, 49.2, 46.2, 21.8, 21.6. HRMS (ESI) calculated for  $\text{C}_{18}\text{H}_{22}\text{N}_2\text{NaO}_2\text{S}^+$   $[\text{M}+\text{Na}]^+$ : 353.1294, found 353.1293.

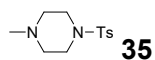

#### 1-methyl-4-tosylpiperazine **35**



**35** was prepared according to the general procedure **A**, and purified by chromatography on silica gel (DCM: MeOH = 15:1) to furnish the desired compound **35** (46 % yield) as a white solid. m. p. 155.6-157.4 °C; IR (KBr)  $\nu_{\text{max}}$ : 2853, 2797, 1345, 1287, 1167, 1151, 943, 921  $\text{cm}^{-1}$ .  $^1\text{H}$  NMR (400 MHz, Chloroform-*d*)  $\delta$  7.67 – 7.59 (m, 2H), 7.32 (d,  $J$  = 8.1 Hz, 2H), 3.04 (t,  $J$  = 4.9 Hz, 4H), 2.49 (t,  $J$  = 5.0 Hz, 4H), 2.42 (s, 3H), 2.28 (s, 3H).  $^{13}\text{C}$  NMR (100 MHz, Chloroform-*d*)  $\delta$  143.7, 132.4, 129.6, 127.9, 54.0, 45.9, 45.6, 21.5. HRMS (ESI) calculated for  $\text{C}_{12}\text{H}_{18}\text{N}_2\text{NaO}_2\text{S}^+$   $[\text{M}+\text{Na}]^+$ : 277.0981, found 277.0979.

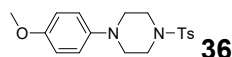

#### 1-(4-methoxyphenyl)-4-tosylpiperazine **36**

**36** was prepared according to the general procedure **A**, and purified by chromatography on silica gel (petroleum ether: ethyl acetate = 8:1) to furnish the desired compound **36** (87 % yield) as a white solid. m. p. 177.3-178.5 °C; IR (KBr)  $\nu_{\text{max}}$ : 2825, 2361, 1596, 1513, 1161, 908, 731, 548  $\text{cm}^{-1}$ .  $^1\text{H}$  NMR (400 MHz, Chloroform-*d*)  $\delta$  7.67 (d,  $J$  = 7.9 Hz, 2H), 7.34 (d,  $J$  = 7.9 Hz, 2H), 6.83 (t,  $J$  = 6.3 Hz, 4H), 3.75 (s, 3H), 3.14 (dq,  $J$  = 9.5, 4.1 Hz, 8H), 2.44 (s, 3H).  $^{13}\text{C}$  NMR (100 MHz, Chloroform-*d*)  $\delta$  154.6, 145.0, 143.8, 132.4, 129.7, 127.9, 119.1, 114.5, 55.5, 50.6, 46.2, 21.5. HRMS (ESI) calculated for  $\text{C}_{18}\text{H}_{22}\text{N}_2\text{NaO}_3\text{S}^+$   $[\text{M}+\text{Na}]^+$ : 369.1243, found 369.1244.

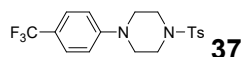

#### 1-tosyl-4-(4-(trifluoromethyl)phenyl)piperazine **37**

**37** was prepared according to the general procedure **A**, and purified by chromatography on silica gel (petroleum ether: ethyl acetate = 8:1) to furnish the desired compound **37** (81 % yield) as a white solid. m. p. 219.5-220.8 °C; IR (KBr)  $\nu_{\text{max}}$ : 2835, 1615, 1455, 1331, 1208, 1021, 812, 578  $\text{cm}^{-1}$ .  $^1\text{H}$  NMR (400 MHz, Chloroform-*d*)  $\delta$  7.78 – 7.56 (m, 2H), 7.46 (d,  $J$  = 8.6 Hz, 2H), 7.35 (d,  $J$  = 8.0 Hz, 2H), 6.87 (d,  $J$  = 8.7 Hz, 2H), 3.34 (dd,  $J$  = 6.3, 3.8 Hz, 4H), 3.28 – 3.13 (m, 4H), 2.44 (s, 3H).  $^{13}\text{C}$  NMR (100 MHz, Chloroform-*d*)  $\delta$  152.7, 144.0, 132.3, 129.8, 127.9, 126.5 (d,  $J$  = 4.2 Hz), 115.3, 48.0, 45.8, 21.6.  $^{19}\text{F}$  NMR (376 MHz, Chloroform-*d*)  $\delta$  -61.6. HRMS (ESI) calculated for  $\text{C}_{18}\text{H}_{19}\text{F}_3\text{N}_2\text{NaO}_2\text{S}^+$   $[\text{M}+\text{Na}]^+$ : 407.1012, found 407.1015.

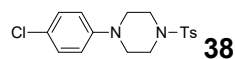

#### 1-(4-chlorophenyl)-4-tosylpiperazine **38**

**38** was prepared according to the general procedure **A**, and purified by chromatography on silica gel (petroleum ether: ethyl acetate = 8:1) to furnish the desired compound **38** (78% yield) as a white solid. m. p. 205.4-206.9 °C; IR (KBr)  $\nu_{\text{max}}$ : 2831, 2361, 1495, 1349, 1161, 946, 732, 547  $\text{cm}^{-1}$ .  $^1\text{H}$  NMR (400 MHz, Chloroform-*d*)  $\delta$  7.71 – 7.64 (m, 2H), 7.34 (d,  $J$  = 8.0 Hz, 2H), 7.22 – 7.15 (m, 2H), 6.81 – 6.74 (m, 2H), 3.22 – 3.18 (m, 4H), 3.15 (d,  $J$  = 5.6 Hz, 4H), 2.44 (s, 3H).  $^{13}\text{C}$  NMR (100 MHz, Chloroform-*d*)  $\delta$  149.3, 143.9, 132.4, 129.8, 129.1, 127.9, 125.7, 118.0, 49.14, 45.9, 21.5. HRMS (ESI) calculated for  $\text{C}_{17}\text{H}_{19}\text{ClN}_2\text{NaO}_2\text{S}^+$   $[\text{M}+\text{Na}]^+$ : 373.0748, found 373.0751.

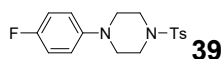

#### 1-(4-fluorophenyl)-4-tosylpiperazine **39**

**39** was prepared according to the general procedure **A**, and purified by chromatography on silica gel (petroleum ether: ethyl acetate = 8:1) to furnish the desired compound **39** (74 % yield) as a white solid. m. p. 189.1-191.0 °C; IR (KBr)  $\nu_{\text{max}}$ : 2853, 2361, 1512, 1354, 1269, 1121, 901, 650, 516  $\text{cm}^{-1}$ .  $^1\text{H}$  NMR (400 MHz, Chloroform-*d*)  $\delta$  7.67 (d,  $J$  = 7.9 Hz, 2H), 7.34 (d,  $J$  = 7.9 Hz, 2H), 6.93 (t,  $J$  = 8.5 Hz, 2H), 6.82 (dd,  $J$  = 9.0, 4.6 Hz, 2H), 3.14 (s, 8H), 2.43 (s, 3H).  $^{13}\text{C}$  NMR (100 MHz, Chloroform-*d*)  $\delta$  158.9, 156.5, 147.4, 143.9, 132.4, 128.8 (d,  $J$  = 186.4 Hz), 118.8 (d,  $J$  = 7.7 Hz), 115.8 (d,  $J$  = 22.0 Hz), 50.1, 46.1, 21.5.  $^{19}\text{F}$  NMR (376 MHz, Chloroform-*d*)  $\delta$  -123.0. HRMS (ESI) calculated for  $\text{C}_{17}\text{H}_{19}\text{FN}_2\text{NaO}_2\text{S}^+$   $[\text{M}+\text{Na}]^+$ : 357.1043, found 357.1042.

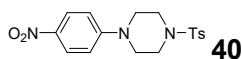

#### 1-(4-nitrophenyl)-4-tosylpiperazine **40**

**40** was prepared according to the general procedure **A**, and purified by chromatography on silica gel (petroleum ether: ethyl acetate = 6:1) to furnish the desired compound **40** (76 % yield) as a yellow solid. m. p. 201.8-203.0 °C; IR (KBr)  $\nu_{\text{max}}$ : 2844, 2361, 1592, 1499, 1318, 1163, 946, 695  $\text{cm}^{-1}$ .  $^1\text{H}$  NMR (400 MHz, Chloroform-*d*)  $\delta$  8.15 – 8.03 (m, 2H), 7.77 – 7.59 (m, 2H), 7.35 (d,  $J$  = 8.0 Hz, 2H), 6.82 – 6.75 (m, 2H), 3.65 – 3.35 (m, 4H), 3.21 – 3.08 (m, 4H), 2.43 (s, 3H).  $^{13}\text{C}$  NMR (100 MHz, Chloroform-*d*)  $\delta$  154.2, 144.2, 139.3, 132.2, 129.9, 127.8, 125.9, 113.4, 46.9, 45.6, 21.6. HRMS (ESI) calculated for  $\text{C}_{17}\text{H}_{19}\text{N}_3\text{NaO}_4\text{S}^+$   $[\text{M}+\text{Na}]^+$ : 384.0988, found 384.0987.

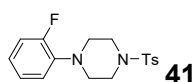

#### 1-(2-fluorophenyl)-4-tosylpiperazine **41**

**41** was prepared according to the general procedure **A**, and purified by chromatography on silica gel (petroleum ether: ethyl acetate = 8:1) to furnish the desired compound **41** (81 % yield) as a white solid. m. p. 149.9-151.0 °C; IR (KBr)  $\nu_{\text{max}}$ : 3426, 3043, 2983, 2830, 1595, 1345, 1124, 956, 727  $\text{cm}^{-1}$ .  $^1\text{H}$  NMR (400 MHz, Chloroform-*d*)  $\delta$  7.67 (d,  $J$  = 8.3 Hz, 2H), 7.34 (d,  $J$  = 8.1 Hz, 2H), 7.10 – 6.84 (m, 4H), 3.25 – 3.01 (m, 8H), 2.43 (s, 3H).  $^{13}\text{C}$  NMR (100 MHz, Chloroform-*d*)  $\delta$  155.7 (d,  $J$  = 245.3 Hz), 143.9, 139.3 (d,  $J$  = 8.7 Hz), 132.4, 129.8, 127.9, 124.6 (d,  $J$  = 3.4 Hz), 123.3 (d,  $J$  = 7.7 Hz), 119.3, 116.2 (d,  $J$  = 20.7 Hz), 50.0 (d,  $J$  = 3.2 Hz), 46.2, 21.6.  $^{19}\text{F}$  NMR (376 MHz, Chloroform-*d*)  $\delta$  -123.2. HRMS (ESI) calculated for  $\text{C}_{17}\text{H}_{19}\text{FN}_2\text{NaO}_2\text{S}^+$   $[\text{M}+\text{Na}]^+$ : 357.1043, found 357.1041.

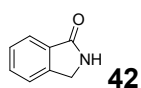

#### isoindolin-1-one **42**

**42** was prepared according to the general procedure, and purified by neutral alumina column (CH<sub>2</sub>Cl<sub>2</sub>: MeOH = 30:1) to furnish the desired compound **42** as a white solid. m. p. 149.8-151.7 °C; IR (KBr)  $\nu_{\text{max}}$ : 3481, 3209, 3080, 3024, 2928, 2862, 1682 cm<sup>-1</sup>. <sup>1</sup>H NMR (400 MHz, Chloroform-*d*)  $\delta$  13.34 (s, 1H), 12.32 (s, 2H), 12.22 (s, 1H), 9.13 (s, 2H). <sup>13</sup>C NMR (100 MHz, Chloroform-*d*)  $\delta$  175.2, 149.3, 137.8, 136.4, 132.8, 128.9, 128.0, 50.1. HRMS (ESI) calculated for C<sub>8</sub>H<sub>7</sub>NNaO<sup>+</sup> [M+Na]<sup>+</sup>: 156.0420, found 156.0418.

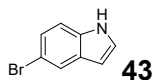

#### 5-bromo-1H-indole **43**

**43** was prepared according to the general procedure, and purified by neutral alumina column (CH<sub>2</sub>Cl<sub>2</sub>: MeOH = 20:1) to furnish the desired compound **43** as a white solid. m. p. 90.8-92.5 °C; IR (KBr)  $\nu_{\text{max}}$ : 3384, 3102, 3030, 1621, 1563, 1452, 1312, 800 cm<sup>-1</sup>. <sup>1</sup>H NMR (400 MHz, DMSO-*d*<sub>6</sub>)  $\delta$  11.33 (s, 1H), 7.74 (d, *J* = 2.0 Hz, 1H), 7.44 – 7.35 (m, 2H), 7.21 (dd, *J* = 8.5, 2.0 Hz, 1H), 6.44 (d, *J* = 3.1 Hz, 1H). <sup>13</sup>C NMR (100 MHz, DMSO-*d*<sub>6</sub>)  $\delta$  135.1, 130.0, 127.3, 123.9, 122.7, 113.8, 101.3, 79.7. HRMS (ESI) calculated for C<sub>8</sub>H<sub>6</sub>BrNNa<sup>+</sup> [M+Na]<sup>+</sup>: 217.9576, found 217.9573.

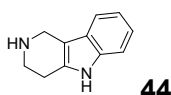

#### 2,3,4,5-tetrahydro-1H-pyrido[4,3-*b*]indole **44**

**44** was prepared according to the general procedure, and purified by neutral alumina column (CH<sub>2</sub>Cl<sub>2</sub>: MeOH = 15:1) to furnish the desired compound **44** as a white solid. m. p. 216.3-218.1 °C; IR (KBr)  $\nu_{\text{max}}$ : 1616, 1579, 1562, 1487, 1345, 1240, 1013, 918 cm<sup>-1</sup>. <sup>1</sup>H NMR (400 MHz, DMSO-*d*<sub>6</sub>)  $\delta$  10.79 (s, 1H), 7.36 (d, *J* = 7.7 Hz, 1H), 7.28 (d, *J* = 8.0 Hz, 1H), 7.01 (ddd, *J* = 8.1, 7.0, 1.3 Hz, 1H), 6.94 (td, *J* = 7.4, 1.1 Hz, 1H), 4.91 (d, *J* = 7.8 Hz, 1H), 3.97 (s, 2H), 3.08 (t, *J* = 5.7 Hz, 2H), 2.67 (t, *J* = 5.5 Hz, 2H). <sup>13</sup>C NMR (100 MHz, DMSO-*d*<sub>6</sub>)  $\delta$  136.1, 132.2, 127.3, 121.0, 118.8, 117.8, 111.4, 106.9, 43.2, 42.3, 21.3. HRMS (ESI) calculated for C<sub>11</sub>H<sub>12</sub>N<sub>2</sub>Na<sup>+</sup> [M+Na]<sup>+</sup>: 195.0893, found 195.0897.

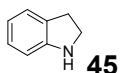

#### Indoline **45**

**45** was prepared according to the general procedure, and purified by neutral alumina column (CH<sub>2</sub>Cl<sub>2</sub>: MeOH = 30:1) to furnish the desired compound **45** as a brown oil. IR (KBr)  $\nu_{\text{max}}$ : 3375, 3046, 3029, 2932, 1606, 1486, 1406, 1322, 1244, 1167, 1092, 1056, 1022 cm<sup>-1</sup>. <sup>1</sup>H NMR (400 MHz, Chloroform-*d*)  $\delta$  7.13 – 7.05 (m, 1H), 7.00 (td, *J* = 7.6, 1.1 Hz, 1H), 6.72 – 6.60 (m, 2H), 3.52 (t, *J* = 8.4 Hz, 3H), 3.01 (t, *J* = 8.4 Hz, 2H). <sup>13</sup>C NMR (100 MHz, Chloroform-*d*)  $\delta$  151.7, 129.4, 127.3, 124.7, 118.7, 109.5, 47.4, 29.9. HRMS (ESI) calculated for C<sub>8</sub>H<sub>9</sub>NNa<sup>+</sup> [M+Na]<sup>+</sup>: 142.0627, found 142.0626.

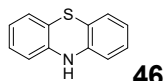

#### 10H-phenothiazine **46**

**46** was prepared according to the general procedure, and purified by neutral alumina column (CH<sub>2</sub>Cl<sub>2</sub>: MeOH = 20:1) to furnish the desired compound **46** as a white solid. m. p. 183.8-184.6 °C; IR (KBr)  $\nu_{\text{max}}$ : 3338, 3097, 1596, 1572, 1473, 1444, 1155, 1118, 1034, 856, 682, 655, 493 cm<sup>-1</sup>. <sup>1</sup>H NMR (400 MHz, DMSO-*d*<sub>6</sub>)  $\delta$  8.60 (s, 1H), 6.99 (td, *J* = 7.6, 1.5 Hz, 2H), 6.92 (dd, *J* = 7.7, 1.5 Hz, 2H), 6.80 – 6.67 (m, 4H). <sup>13</sup>C NMR (100 MHz, DMSO-*d*<sub>6</sub>)  $\delta$  142.6, 128.0, 126.7, 122.2, 116.9, 114.9. HRMS (ESI) calculated for C<sub>12</sub>H<sub>9</sub>NNaS<sup>+</sup> [M+Na]<sup>+</sup>: 222.0348, found 222.0346.

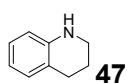

#### 1,2,3,4-tetrahydroquinoline **47**

**47** was prepared according to the general procedure, and purified by neutral alumina column (CH<sub>2</sub>Cl<sub>2</sub>: MeOH = 20:1) to furnish the desired compound **47** as a yellow oil. IR (KBr)  $\nu_{\text{max}}$ : 3415, 2923, 2835, 1605, 1496, 1311, 743 cm<sup>-1</sup>. <sup>1</sup>H NMR (400 MHz, Chloroform-*d*)  $\delta$  7.05 – 6.87 (m, 2H), 6.59 (td, *J* = 7.4, 1.2 Hz, 1H), 6.44 (dd, *J* = 7.8, 1.2 Hz, 1H), 3.66 (s, 1H), 3.30 – 3.24 (m, 2H), 2.74 (t, *J* = 6.4 Hz, 2H), 1.96 – 1.88 (m, 2H). <sup>13</sup>C NMR (100 MHz, Chloroform-*d*)  $\delta$  144.8, 129.6, 126.8, 121.5, 117.0, 114.2, 42.0, 27.0, 22.2. HRMS (ESI) calculated for C<sub>9</sub>H<sub>11</sub>NNa<sup>+</sup> [M+Na]<sup>+</sup>: 156.0784, found 156.0788.

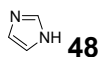

#### 1H-imidazole **48**

**48** was prepared according to the general procedure, and purified by neutral alumina column (CH<sub>2</sub>Cl<sub>2</sub>: MeOH = 20:1) to furnish the desired compound **48** as a white solid. m. p. 90.2-91.8 °C; IR (KBr)  $\nu_{\text{max}}$ : 3126, 3032, 2933, 2785, 2691, 1451, 1264, 1058, 935, 841, 762, 661 cm<sup>-1</sup>. <sup>1</sup>H NMR (400 MHz, DMSO-*d*<sub>6</sub>)  $\delta$  12.17 (s, 1H), 7.68 (t, *J* = 1.1 Hz, 1H), 7.04 (d, *J* = 0.9 Hz, 2H). <sup>13</sup>C NMR (100 MHz, DMSO-*d*<sub>6</sub>)  $\delta$  135.6, 122.2. HRMS (ESI) calculated for C<sub>3</sub>H<sub>4</sub>N<sub>2</sub>Na<sup>+</sup> [M+Na]<sup>+</sup>: 91.0627, found 91.0629.

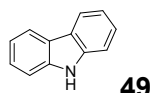

#### 9H-carbazole **49**

**49** was prepared according to the general procedure, and purified by neutral alumina column (CH<sub>2</sub>Cl<sub>2</sub>: MeOH = 20:1) to furnish the desired compound **49** as a white solid. m. p. 243.6-245.2 °C; IR (KBr)  $\nu_{\text{max}}$ : 1626, 1602, 1493, 1395, 1337, 1239, 1204, 1108, 927, 857, 748, 573, 508, 439 cm<sup>-1</sup>. <sup>1</sup>H NMR (400 MHz, DMSO-*d*<sub>6</sub>)  $\delta$  7.24 (d, *J* = 7.7 Hz, 2H), 6.61 (dd, *J* = 28.5, 7.8 Hz, 4H), 6.34 (q, *J* = 6.2, 4.8 Hz, 2H). <sup>13</sup>C NMR (100 MHz, DMSO-*d*<sub>6</sub>)  $\delta$

140.2, 126.0, 122.9, 120.6, 119.0, 111.4. HRMS (ESI) calculated for  $C_{12}H_9NNa^+$   $[M+Na]^+$ : 190.0627, found 190.0627.

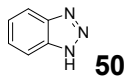

**1H-benzo[d][1,2,3]triazole 50**

**50** was prepared according to the general procedure, and purified by neutral alumina column ( $CH_2Cl_2$ : MeOH = 30:1) to furnish the desired compound **50** as a white solid. m. p. 97.9-99.1 °C; IR (KBr)  $\nu_{max}$ : 3469, 3085, 2996, 2912, 2850, 2800, 2715, 2519, 1408, 1207, 1008, 870, 741  $cm^{-1}$ .  $^1H$  NMR (400 MHz, Chloroform-*d*)  $\delta$  14.19 (s, 1H), 7.96 (dd,  $J$  = 6.4, 3.1 Hz, 2H), 7.46 – 7.41 (m, 2H).  $^{13}C$  NMR (100 MHz, Chloroform-*d*)  $\delta$  138.9, 126.1, 115.0. HRMS (ESI) calculated for  $C_6H_5N_3Na^+$   $[M+Na]^+$ : 142.0376, found 142.0377.

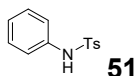

**4-methyl-N-phenylbenzenesulfonamide 51**

**51** was prepared according to the general procedure, and purified by chromatography on silica gel (DCM: MeOH = 20:1) to furnish the desired compound **51** as a white solid. m. p. 104.1-106.4 °C; IR (KBr)  $\nu_{max}$ : 3291, 3024, 2933, 2865, 1512, 1332, 1157, 981, 812, 511  $cm^{-1}$ .  $^1H$  NMR (400 MHz, Chloroform-*d*)  $\delta$  7.75 – 7.66 (m, 2H), 7.27 (d,  $J$  = 3.7 Hz, 1H), 7.21 (td,  $J$  = 4.4, 1.8 Hz, 3H), 7.18 – 7.01 (m, 3H), 2.36 (d,  $J$  = 3.6 Hz, 3H).  $^{13}C$  NMR (100 MHz, Chloroform-*d*)  $\delta$  145.0, 136.7, 134.4, 131.6, 130.2, 129.6, 129.2, 128.6, 21.7. HRMS (ESI) calculated for  $C_{13}H_{13}NNaO_2S^+$   $[M+Na]^+$ : 270.0559, found 270.0557.

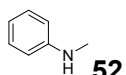

**N-methylaniline 52**

**52** was prepared according to the general procedure, and purified by chromatography on silica gel (petroleum ether: ethyl acetate = 10:1) to furnish the desired compound **52** as a colorless oil. IR (KBr)  $\nu_{max}$ : 3441, 3056, 3023, 2966, 2933, 2912, 2885, 2818, 1606, 1511, 1477, 1423, 1318, 1261, 1160, 692  $cm^{-1}$ .  $^1H$  NMR (400 MHz, Chloroform-*d*)  $\delta$  7.57 – 7.43 (m, 2H), 7.03 (tt,  $J$  = 7.3, 1.2 Hz, 1H), 6.91 – 6.75 (m, 2H), 3.80 (s, 1H), 3.00 (s, 3H).  $^{13}C$  NMR (100 MHz, Chloroform-*d*)  $\delta$  149.8, 129.5, 117.4, 112.7, 30.9. HRMS (ESI) calculated for  $C_7H_9NNa^+$   $[M+Na]^+$ : 130.0627, found 130.0628.

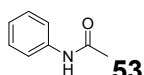

**N-phenylacetamide 53**

**53** was prepared according to the general procedure, and purified by chromatography on silica gel (petroleum ether: ethyl acetate = 8:1) to furnish the desired compound **53** as a white solid. m. p. 113.4-115.3 °C; IR (KBr)  $\nu_{max}$ : 3293, 3262, 3141, 1666, 1621, 1597, 1553, 1501, 1436, 1322, 1264, 762, 755, 609  $cm^{-1}$ .  $^1H$  NMR (400 MHz, DMSO-*d*<sub>6</sub>)  $\delta$  9.92 (s, 1H), 7.65 – 7.58 (m, 2H), 7.32 – 7.26 (m, 2H), 7.02 (tt,  $J$  = 7.4, 1.2 Hz, 1H), 2.06 (s, 3H).  $^{13}C$

NMR (100 MHz, DMSO- $d_6$ )  $\delta$  168.7, 139.8, 129.1, 123.4, 119.5, 24.4. HRMS (ESI) calculated for  $C_8H_9NNaO^+$   $[M+Na]^+$ : 158.0576, found 158.0574.

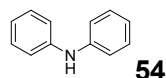

#### Diphenylamine **54**

**54** was prepared according to the general procedure, and purified by chromatography on silica gel (petroleum ether: ethyl acetate = 6:1) to furnish the desired compound **54** as a white solid. m. p. 52.8-53.4 °C; IR (KBr)  $\nu_{max}$ : 3385, 3052, 1596, 1522, 1493, 1318, 1311, 1172, 758, 744, 692  $cm^{-1}$ .  $^1H$  NMR (400 MHz, Chloroform- $d$ )  $\delta$  7.28 – 7.22 (m, 4H), 7.05 (d,  $J$  = 7.9 Hz, 4H), 6.91 (t,  $J$  = 7.4 Hz, 2H), 5.66 (s, 1H).  $^{13}C$  NMR (100 MHz, Chloroform- $d$ )  $\delta$  143.2, 129.4, 121.0, 117.9. HRMS (ESI) calculated for  $C_{12}H_{11}NNa^+$   $[M+Na]^+$ : 192.0784, found 192.0788.

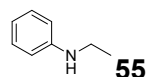

#### N-ethylaniline **55**

**55** was prepared according to the general procedure, and purified by chromatography on silica gel (petroleum ether: ethyl acetate = 10:1) to furnish the desired compound **55** as a brown oil. IR (KBr)  $\nu_{max}$ : 3422, 3054, 3023, 2972, 2928, 2876, 1605, 1506, 1481, 1317, 1259, 1176, 1148, 691, 618  $cm^{-1}$ .  $^1H$  NMR (400 MHz, Chloroform- $d$ )  $\delta$  7.66 – 7.30 (m, 2H), 7.02 (tt,  $J$  = 7.3, 1.1 Hz, 1H), 6.95 – 6.81 (m, 2H), 3.73 (s, 1H), 3.38 (q,  $J$  = 7.2 Hz, 2H), 1.48 (d,  $J$  = 14.4 Hz, 3H).  $^{13}C$  NMR (100 MHz, Chloroform- $d$ )  $\delta$  148.8, 129.5, 117.4, 113.0, 38.6, 15.1. HRMS (ESI) calculated for  $C_8H_{11}NNa^+$   $[M+Na]^+$ : 144.0784, found 144.0786.

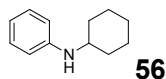

#### N-cyclohexylaniline **56**

**56** was prepared according to the general procedure, and purified by chromatography on silica gel (petroleum ether: ethyl acetate = 12:1) to furnish the desired compound **56** as a colorless oil. IR (KBr)  $\nu_{max}$ : 3402, 3198, 2927, 2333, 2087, 1814, 1598, 1501, 1313, 1153, 994, 884, 747, 688  $cm^{-1}$ .  $^1H$  NMR (400 MHz, Chloroform- $d$ )  $\delta$  7.14 (t,  $J$  = 7.8 Hz, 2H), 6.61 (dd,  $J$  = 31.6, 7.8 Hz, 3H), 3.24 (ddd,  $J$  = 13.2, 6.9, 3.1 Hz, 2H), 2.05 (d,  $J$  = 12.6 Hz, 2H), 1.90 – 1.70 (m, 2H), 1.70 – 1.59 (m, 1H), 1.36 (q,  $J$  = 12.1 Hz, 2H), 1.28 – 1.00 (m, 3H).  $^{13}C$  NMR (100 MHz, Chloroform- $d$ )  $\delta$  147.4, 129.3, 116.8, 113.2, 51.7, 33.5, 26.0, 25.0. HRMS (ESI) calculated for  $C_{12}H_{17}NNa^+$   $[M+Na]^+$ : 198.1253, found 198.1255.

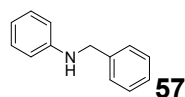

#### N-benzylaniline **57**

**57** was prepared according to the general procedure, and purified by chromatography on silica gel (petroleum ether: ethyl acetate = 5:1) to furnish the desired compound **57** as a white solid. m. p. 36.9-38.1 °C; IR (KBr)  $\nu_{max}$ : 3419, 3052, 3025, 2926, 1604, 1517, 1496,

1455, 1331, 1303, 1282, 1182, 985, 751, 744, 739, 695, 689  $\text{cm}^{-1}$ .  $^1\text{H}$  NMR (400 MHz, Chloroform-*d*)  $\delta$  7.33 – 7.27 (m, 4H), 7.25 – 7.20 (m, 1H), 7.16 – 7.11 (m, 2H), 6.68 (td,  $J$  = 7.3, 1.1 Hz, 1H), 6.59 – 6.55 (m, 2H), 4.24 (s, 2H), 3.91 (s, 1H).  $^{13}\text{C}$  NMR (100 MHz, Chloroform-*d*)  $\delta$  139.7, 129.4, 127.7, 127.4, 117.7, 113.0, 48.4. HRMS (ESI) calculated for  $\text{C}_{13}\text{H}_{13}\text{NNa}^+$   $[\text{M}+\text{Na}]^+$ : 206.0940, found 206.0944.

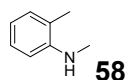

#### *N*,2-dimethylaniline **58**

**58** was prepared according to the general procedure, and purified by chromatography on silica gel (petroleum ether: ethyl acetate = 10:1) to furnish the desired compound **58** as a yellow oil. IR (KBr)  $\nu_{\text{max}}$ : 3464, 3056, 2931, 2914, 2856, 1879, 1611, 1586, 1516, 1474, 1303, 1253, 1162, 1045, 966, 544  $\text{cm}^{-1}$ .  $^1\text{H}$  NMR (400 MHz, Chloroform-*d*)  $\delta$  7.52 (td,  $J$  = 7.7, 1.6 Hz, 1H), 7.40 (dd,  $J$  = 7.4, 1.5 Hz, 1H), 7.22 – 7.01 (m, 1H), 6.95 (dd,  $J$  = 8.1, 1.2 Hz, 1H), 3.80 (s, 1H), 3.16 (s, 3H), 2.44 (s, 3H).  $^{13}\text{C}$  NMR (100 MHz, Chloroform-*d*)  $\delta$  147.6, 130.2, 127.5, 122.2, 117.1, 109.4, 31.0, 17.6. HRMS (ESI) calculated for  $\text{C}_8\text{H}_{11}\text{NNa}^+$   $[\text{M}+\text{Na}]^+$ : 144.0784, found 144.0785.

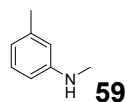

#### *N*,3-dimethylaniline **59**

**59** was prepared according to the general procedure, and purified by chromatography on silica gel (petroleum ether: ethyl acetate = 10:1) to furnish the desired compound **59** as a yellow oil. IR (KBr)  $\nu_{\text{max}}$ : 3414, 3046, 2983, 2919, 2887, 1607, 1593, 1513, 1495, 1331, 1270, 992, 693  $\text{cm}^{-1}$ .  $^1\text{H}$  NMR (400 MHz, Chloroform-*d*)  $\delta$  7.52 – 7.31 (m, 1H), 6.87 (d,  $J$  = 7.6 Hz, 1H), 6.70 (dq,  $J$  = 5.5, 2.5 Hz, 2H), 3.78 (s, 1H), 3.04 (s, 3H), 2.62 (d,  $J$  = 1.5 Hz, 3H).  $^{13}\text{C}$  NMR (100 MHz, Chloroform-*d*)  $\delta$  149.8, 139.1, 129.4, 118.4, 113.5, 109.9, 30.9, 21.9. HRMS (ESI) calculated for  $\text{C}_8\text{H}_{11}\text{NNa}^+$   $[\text{M}+\text{Na}]^+$ : 144.0784, found 144.0781.

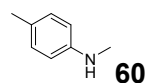

#### *N*,4-dimethylaniline **60**

**60** was prepared according to the general procedure, and purified by chromatography on silica gel (petroleum ether: ethyl acetate = 10:1) to furnish the desired compound **60** as a yellow oil. IR (KBr)  $\nu_{\text{max}}$ : 3411, 3018, 2981, 2920, 2867, 1619, 1526, 1488, 1317, 1261, 1183, 809  $\text{cm}^{-1}$ .  $^1\text{H}$  NMR (400 MHz, Chloroform-*d*)  $\delta$  7.23 (d,  $J$  = 8.3 Hz, 2H), 6.88 – 6.55 (m, 2H), 3.61 (s, 1H), 2.97 (s, 3H), 2.48 (d,  $J$  = 1.4 Hz, 3H).  $^{13}\text{C}$  NMR (100 MHz, Chloroform-*d*)  $\delta$  147.4, 129.9, 126.5, 112.8, 31.2, 20.6. HRMS (ESI) calculated for  $\text{C}_8\text{H}_{11}\text{NNa}^+$   $[\text{M}+\text{Na}]^+$ : 144.0784, found 144.0788.

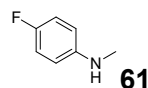

#### 4-fluoro-*N*-methylaniline **61**

**61** was prepared according to the general procedure, and purified by chromatography on silica gel (petroleum ether: ethyl acetate = 10:1) to furnish the desired compound **61** as a black oil. IR (KBr)  $\nu_{\max}$ : 3422, 3060, 2914, 1615, 1473, 1512, 1320, 1221, 823  $\text{cm}^{-1}$ .  $^1\text{H}$  NMR (400 MHz, Chloroform-*d*)  $\delta$  6.91 – 6.83 (m, 2H), 6.51 – 6.44 (m, 2H), 3.66 – 3.32 (m, 1H), 2.73 (s, 3H).  $^{13}\text{C}$  NMR (100 MHz, Chloroform-*d*)  $\delta$  155.8 (d,  $J$  = 234.3 Hz), 145.9, 115.6 (d,  $J$  = 21.9 Hz), 113.2 (d,  $J$  = 7.3 Hz), 31.2. HRMS (ESI) calculated for  $\text{C}_7\text{H}_8\text{FNNa}^+$  [ $\text{M}+\text{Na}$ ] $^+$ : 148.0533, found 148.0535.

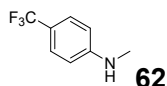

#### *N*-methyl-4-(trifluoromethyl)aniline **62**

**62** was prepared according to the general procedure, and purified by chromatography on silica gel (petroleum ether: ethyl acetate = 10:1) to furnish the desired compound **62** as a brown oil. IR (KBr)  $\nu_{\max}$ : 3456, 2933, 2254, 1795, 1652, 1536, 1478, 1381, 1325, 1274, 1188, 1106, 1074  $\text{cm}^{-1}$ .  $^1\text{H}$  NMR (400 MHz, Chloroform-*d*)  $\delta$  7.50 – 7.31 (m, 2H), 6.54 (d,  $J$  = 8.5 Hz, 2H), 4.26 – 3.78 (m, 1H), 2.80 (s, 3H).  $^{13}\text{C}$  NMR (100 MHz, Chloroform-*d*)  $\delta$  151.8, 126.5 (d,  $J$  = 3.3 Hz), 123.9, 118.4 (d,  $J$  = 32.7 Hz), 111.4, 30.1.  $^{19}\text{F}$  NMR (376 MHz, Chloroform-*d*)  $\delta$  -60.8. HRMS (ESI) calculated for  $\text{C}_8\text{H}_8\text{F}_3\text{NNa}^+$  [ $\text{M}+\text{Na}$ ] $^+$ : 198.0501, found 198.0500.

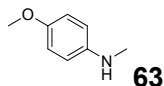

#### 4-methoxy-*N*-methylaniline **63**

**63** was prepared according to the general procedure, and purified by chromatography on silica gel (petroleum ether: ethyl acetate = 10:1) to furnish the desired compound **63** as a brown oil. m. p. 33.9-35.8  $^{\circ}\text{C}$ ; IR (KBr)  $\nu_{\max}$ : 3428, 3048, 2933, 2828, 1617, 1606, 1511, 1467, 1323, 1243, 1163  $\text{cm}^{-1}$ .  $^1\text{H}$  NMR (400 MHz, Chloroform-*d*)  $\delta$  6.83 – 6.70 (m, 2H), 6.56 – 6.45 (m, 2H), 3.71 – 3.65 (m, 3H), 3.37 (s, 1H), 2.70 (s, 3H).  $^{13}\text{C}$  NMR (100 MHz, Chloroform-*d*)  $\delta$  152.1, 144.0, 115.0, 113.7, 55.8, 31.6. HRMS (ESI) calculated for  $\text{C}_8\text{H}_{11}\text{NNaO}^+$  [ $\text{M}+\text{Na}$ ] $^+$ : 160.0733, found 160.0738.

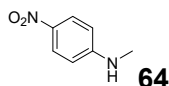

#### *N*-methyl-4-nitroaniline **64**

**64** was prepared according to the general procedure, and purified by chromatography on silica gel (petroleum ether: ethyl acetate = 10:1) to furnish the desired compound **64** as a brown solid. m. p. 149.6-151.4  $^{\circ}\text{C}$ ; IR (KBr)  $\nu_{\max}$ : 3368, 3011, 2915, 2828, 1602, 1548, 1462, 1362, 1320, 1309, 1289, 1113, 998, 834, 623  $\text{cm}^{-1}$ .  $^1\text{H}$  NMR (400 MHz, DMSO-*d*<sub>6</sub>)  $\delta$  8.26 – 7.76 (m, 2H), 7.31 (q,  $J$  = 5.0 Hz, 1H), 6.76 – 6.53 (m, 2H), 2.83 (d,  $J$  = 5.1 Hz, 3H).



$^{13}\text{C}$  NMR (100 MHz,  $\text{DMSO-}d_6$ )  $\delta$  155.7, 136.1, 126.6, 110.8, 29.6. HRMS (ESI) calculated for  $\text{C}_7\text{H}_8\text{N}_2\text{NaO}_2^+$   $[\text{M}+\text{Na}]^+$ : 175.0478, found 175.0474.

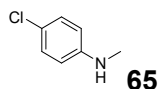

#### 4-chloro-*N*-methylaniline **65**

**65** was prepared according to the general procedure, and purified by chromatography on silica gel (petroleum ether: ethyl acetate = 10:1) to furnish the desired compound **65** as a yellow oil. IR (KBr)  $\nu_{\text{max}}$ : 3428, 3056, 2933, 2814, 1866, 1606, 1504, 1468, 1447, 1316, 1260, 1179, 1095, 815  $\text{cm}^{-1}$ .  $^1\text{H}$  NMR (400 MHz, Chloroform-*d*)  $\delta$  7.15 – 7.02 (m, 2H), 6.54 – 6.34 (m, 2H), 3.57 (s, 1H), 2.69 (s, 3H).  $^{13}\text{C}$  NMR (100 MHz, Chloroform-*d*)  $\delta$  148.1, 129.0, 121.6, 113.5, 30.8. HRMS (ESI) calculated for  $\text{C}_7\text{H}_8\text{ClNNa}^+$   $[\text{M}+\text{Na}]^+$ : 164.0237, found 164.0233.

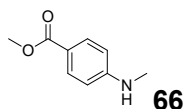

#### methyl 4-(methylamino)benzoate **66**

**66** was prepared according to the general procedure, and purified by chromatography on silica gel (petroleum ether: ethyl acetate = 10:1) to furnish the desired compound **66** as a white solid. m. p. 93.8-95.4  $^\circ\text{C}$ ; IR (KBr)  $\nu_{\text{max}}$ : 3395, 3072, 2948, 1693, 1608, 1584, 1518, 1446, 1264, 1245, 1173  $\text{cm}^{-1}$ .  $^1\text{H}$  NMR (400 MHz, Chloroform-*d*)  $\delta$  7.86 (ddd,  $J = 8.7, 4.1, 1.8$  Hz, 2H), 6.52 (ddd,  $J = 8.7, 4.1, 1.9$  Hz, 2H), 4.32 (s, 1H), 3.92 – 3.80 (m, 3H), 2.84 (d,  $J = 5.3$  Hz, 3H).  $^{13}\text{C}$  NMR (100 MHz, Chloroform-*d*)  $\delta$  167.5, 153.0, 131.5, 118.0, 111.1, 51.5, 30.1. HRMS (ESI) calculated for  $\text{C}_9\text{H}_{11}\text{NNaO}_2^+$   $[\text{M}+\text{Na}]^+$ : 188.0687, found 188.0684.

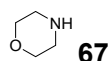

#### Morpholine **67**

**67** was prepared according to the general procedure, and purified by neutral alumina column ( $\text{CH}_2\text{Cl}_2$ : MeOH = 15:1) to furnish the desired compound **67** as a colorless oil. IR (KBr)  $\nu_{\text{max}}$ : 3334, 3304, 3288, 2951, 2933, 2911, 2849, 2830, 1466, 1321, 1143, 1096, 890, 863, 836, 808  $\text{cm}^{-1}$ .  $^1\text{H}$  NMR (400 MHz, Chloroform-*d*)  $\delta$  3.68 (t,  $J = 4.6$  Hz, 4H), 2.88 (t,  $J = 4.6$  Hz, 4H), 1.72 (s, 1H).  $^{13}\text{C}$  NMR (100 MHz, Chloroform-*d*)  $\delta$  68.1, 46.5. HRMS (ESI) calculated for  $\text{C}_4\text{H}_9\text{NNaO}^+$   $[\text{M}+\text{Na}]^+$ : 110.0576, found 110.0573.

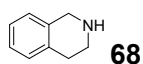

#### 1,2,3,4-tetrahydroisoquinoline **68**

**68** was prepared according to the general procedure, and purified by neutral alumina column ( $\text{CH}_2\text{Cl}_2$ : MeOH = 20:1) to furnish the desired compound **68** as yellow oil. IR (KBr)  $\nu_{\text{max}}$ : 3264, 3043, 2922, 2936, 2810, 1497, 1455, 1424, 1321, 1122, 943, 623, 792, 743  $\text{cm}^{-1}$ .  $^1\text{H}$  NMR (400 MHz, Chloroform-*d*)  $\delta$  7.09 (dq,  $J = 13.3, 3.9$  Hz, 3H), 7.03 – 6.92 (m, 1H),

3.99 (s, 2H), 3.12 (td,  $J = 6.0, 2.5$  Hz, 2H), 2.78 (d,  $J = 6.5$  Hz, 2H), 1.80 (s, 1H).  $^{13}\text{C}$  NMR (100 MHz, Chloroform- $d$ )  $\delta$  136.0, 134.8, 129.3, 126.2, 126.0, 125.7, 48.4, 44.0, 29.2. HRMS (ESI) calculated for  $\text{C}_9\text{H}_{11}\text{NNa}^+$   $[\text{M}+\text{Na}]^+$ : 156.0784, found 156.0788.

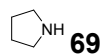

#### Pyrrolidine **69**

**69** was prepared according to the general procedure, and purified by neutral alumina column ( $\text{CH}_2\text{Cl}_2$ : MeOH = 10:1) to furnish the desired compound **69** as a yellow oil. IR (KBr)  $\nu_{\text{max}}$ : 3264, 2957, 2910, 2866, 1486, 1400, 1298, 1168, 1110, 1023, 799  $\text{cm}^{-1}$ .  $^1\text{H}$  NMR (400 MHz, DMSO- $d_6$ )  $\delta$  2.89 – 2.46 (m, 4H), 2.09 (s, 1H), 1.73 – 1.36 (m, 4H).  $^{13}\text{C}$  NMR (100 MHz, DMSO- $d_6$ )  $\delta$  47.0, 25.7. HRMS (ESI) calculated for  $\text{C}_4\text{H}_9\text{NNa}^+$   $[\text{M}+\text{Na}]^+$ : 94.0627, found 94.0629.

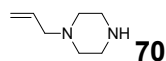

#### 1-allylpiperazine **70**

**70** was prepared according to the general procedure, and purified by neutral alumina column ( $\text{CH}_2\text{Cl}_2$ : MeOH = 20:1) to furnish the desired compound **70** as colorless oil. IR (KBr)  $\nu_{\text{max}}$ : 2941, 2801, 1661, 1449, 1050, 998  $\text{cm}^{-1}$ .  $^1\text{H}$  NMR (400 MHz, Chloroform- $d$ )  $\delta$  5.86 (ddt,  $J = 16.8, 10.1, 6.6$  Hz, 1H), 5.22 – 5.12 (m, 2H), 2.98 (dt,  $J = 6.6, 1.4$  Hz, 2H), 2.89 (t,  $J = 4.9$  Hz, 4H), 2.41 (s, 4H), 1.62 (s, 1H).  $^{13}\text{C}$  NMR (100 MHz, Chloroform- $d$ )  $\delta$  134.9, 117.8, 62.3, 54.4, 46.0. HRMS (ESI) calculated for  $\text{C}_7\text{H}_{14}\text{N}_2\text{Na}^+$   $[\text{M}+\text{Na}]^+$ : 149.1049, found 149.1045.

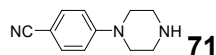

#### 4-(piperazin-1-yl)benzotrile **71**

**71** was prepared according to the general procedure, and purified by neutral alumina column ( $\text{CH}_2\text{Cl}_2$ : MeOH = 20:1) to furnish the desired compound **71** as white solid. m. p. 81.8-83.6  $^\circ\text{C}$ ; IR (KBr)  $\nu_{\text{max}}$ : 3325, 2215, 1606  $\text{cm}^{-1}$ .  $^1\text{H}$  NMR (400 MHz, Chloroform- $d$ )  $\delta$  7.73 – 7.41 (m, 2H), 6.86 (d,  $J = 8.4$  Hz, 2H), 3.31 (t,  $J = 5.2$  Hz, 4H), 3.19 – 2.84 (m, 4H).  $^{13}\text{C}$  NMR (100 MHz, Chloroform- $d$ )  $\delta$  153.8, 133.5, 120.0, 114.2, 100.2, 48.2, 45.7. HRMS (ESI) calculated for  $\text{C}_{11}\text{H}_{13}\text{N}_3\text{Na}^+$   $[\text{M}+\text{Na}]^+$ : 210.1002, found 210.1005.

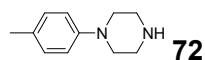

#### 1-(*p*-tolyl)piperazine **72**

**72** was prepared according to the general procedure, and purified by neutral alumina column ( $\text{CH}_2\text{Cl}_2$ : MeOH = 20:1) to furnish the desired compound **72** as white solid. m. p. 32.1-34.0  $^\circ\text{C}$ ; IR (KBr)  $\nu_{\text{max}}$ : 3402, 3033, 2928, 2894, 2811, 1606, 1583, 1499, 1448, 1236, 1143, 943, 769, 696  $\text{cm}^{-1}$ .  $^1\text{H}$  NMR (400 MHz, DMSO- $d_6$ )  $\delta$  7.05 – 6.94 (m, 2H), 6.79 (d,  $J = 8.7$  Hz, 2H), 2.99 – 2.90 (m, 4H), 2.87 – 2.72 (m, 4H), 2.19 (s, 3H).  $^{13}\text{C}$  NMR (100 MHz,

DMSO-*d*<sub>6</sub>)  $\delta$  150.2, 129.8, 127.8, 116.0, 50.4, 46.2, 20.5. HRMS (ESI) calculated for C<sub>11</sub>H<sub>16</sub>N<sub>2</sub>Na<sup>+</sup> [M+Na]<sup>+</sup>: 199.1206, found 199.1203.

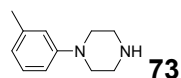

#### 1-(*m*-tolyl)piperazine **73**

**73** was prepared according to the general procedure, and purified by neutral alumina column (CH<sub>2</sub>Cl<sub>2</sub>: MeOH = 20:1) to furnish the desired compound **73** as white solid. m. p. 125.6-127.5 °C; IR (KBr)  $\nu_{\text{max}}$ : 3293, 3037, 2943, 2911, 2821, 1604, 1581, 1496, 1448, 1247, 1147, 954, 775, 694 cm<sup>-1</sup>. <sup>1</sup>H NMR (400 MHz, DMSO-*d*<sub>6</sub>)  $\delta$  7.07 (t, *J* = 7.8 Hz, 1H), 6.74 – 6.65 (m, 2H), 6.58 (dd, *J* = 7.4, 1.4 Hz, 1H), 3.03 – 2.96 (m, 4H), 2.81 (dd, *J* = 6.3, 3.7 Hz, 4H), 2.24 (s, 3H). <sup>13</sup>C NMR (100 MHz, DMSO-*d*<sub>6</sub>)  $\delta$  152.3, 138.3, 129.1, 119.9, 116.5, 113.0, 50.0, 46.2, 21.9. HRMS (ESI) calculated for C<sub>11</sub>H<sub>16</sub>N<sub>2</sub>Na<sup>+</sup> [M+Na]<sup>+</sup>: 199.1206, found 199.1207.

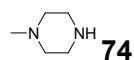

#### 1-methylpiperazine **74**

**74** was prepared according to the general procedure, and purified by neutral alumina column (CH<sub>2</sub>Cl<sub>2</sub>: MeOH = 15:1) to furnish the desired compound **74** as colorless oil. IR (KBr)  $\nu_{\text{max}}$ : 2941, 2913, 2844, 2796, 2766, 1455, 1443, 1317, 1285, 1156, 1147, 1122, 1013, 999, 587 cm<sup>-1</sup>. <sup>1</sup>H NMR (400 MHz, Chloroform-*d*)  $\delta$  1.94 – 1.87 (m, 4H), 1.52 – 1.33 (m, 4H), 1.29 (s, 3H), 0.73 (s, 1H). <sup>13</sup>C NMR (100 MHz, Chloroform-*d*)  $\delta$  55.8, 46.0, 45.4. HRMS (ESI) calculated for C<sub>5</sub>H<sub>12</sub>N<sub>2</sub>Na<sup>+</sup> [M+Na]<sup>+</sup>: 123.0893, found 123.0896.

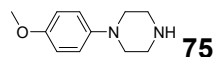

#### 1-(4-methoxyphenyl)piperazine **75**

**75** was prepared according to the general procedure, and purified by neutral alumina column (CH<sub>2</sub>Cl<sub>2</sub>: MeOH = 20:1) to furnish the desired compound **75** as white solid. m. p. 203.7-205.5 °C; IR (KBr)  $\nu_{\text{max}}$ : 3377, 3000, 2933, 1644, 1603, 1513, 1468, 1249, 1027 cm<sup>-1</sup>. <sup>1</sup>H NMR (400 MHz, DMSO-*d*<sub>6</sub>)  $\delta$  6.95 – 6.74 (m, 4H), 3.68 (s, 3H), 2.90 (dd, *J* = 6.4, 3.4 Hz, 4H), 2.82 (dd, *J* = 6.4, 3.3 Hz, 4H). <sup>13</sup>C NMR (100 MHz, DMSO-*d*<sub>6</sub>)  $\delta$  153.3, 146.7, 117.7, 114.7, 55.6, 51.4, 46.2. HRMS (ESI) calculated for C<sub>11</sub>H<sub>16</sub>N<sub>2</sub>NaO<sup>+</sup> [M+Na]<sup>+</sup>: 215.1155, found 215.1157.

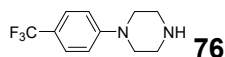

#### 1-(4-(trifluoromethyl)phenyl)piperazine **76**

**76** was prepared according to the general procedure, and purified by neutral alumina column (CH<sub>2</sub>Cl<sub>2</sub>: MeOH = 20:1) to furnish the desired compound **76** as white solid. m. p. 89.2-91.1 °C; IR (KBr)  $\nu_{\text{max}}$ : 3259, 2834, 1669, 1613, 1325, 1099, 1067 cm<sup>-1</sup>. <sup>1</sup>H NMR (400 MHz, DMSO-*d*<sub>6</sub>)  $\delta$  7.48 (d, *J* = 8.7 Hz, 2H), 7.03 (d, *J* = 8.7 Hz, 2H), 3.29 – 3.09 (m, 4H), 2.82 (t, *J* = 5.0 Hz, 4H). <sup>13</sup>C NMR (100 MHz, DMSO-*d*<sub>6</sub>)  $\delta$  154.3, 126.6 (q, *J* = 3.3 Hz), 124.2,

118.2, 114.4, 48.6, 45.8.  $^{19}\text{F}$  NMR (376 MHz,  $\text{DMSO-}d_6$ )  $\delta$  -59.4. HRMS (ESI) calculated for  $\text{C}_{11}\text{H}_{13}\text{F}_3\text{N}_2\text{Na}^+$   $[\text{M}+\text{Na}]^+$ : 253.0923, found 253.0924.

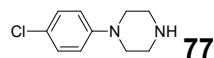

#### 1-(4-chlorophenyl)piperazine **77**

**77** was prepared according to the general procedure, and purified by neutral alumina column ( $\text{CH}_2\text{Cl}_2$ : MeOH = 20:1) to furnish the desired compound **77** as white solid. m. p. 76.6-78.3 °C; IR (KBr)  $\nu_{\text{max}}$ : 3348, 3062, 2934, 2819, 1514, 1477, 1268, 1142, 836, 722  $\text{cm}^{-1}$ .  $^1\text{H}$  NMR (400 MHz,  $\text{DMSO-}d_6$ )  $\delta$  7.26 – 7.17 (m, 2H), 6.96 – 6.88 (m, 2H), 3.02 (d,  $J$  = 7.1 Hz, 4H), 2.81 (t,  $J$  = 5.1 Hz, 4H).  $^{13}\text{C}$  NMR (100 MHz,  $\text{DMSO-}d_6$ )  $\delta$  150.9, 129.0, 122.5, 117.2, 49.6, 46.0. HRMS (ESI) calculated for  $\text{C}_{10}\text{H}_{13}\text{ClN}_2\text{Na}^+$   $[\text{M}+\text{Na}]^+$ : 219.0659, found 219.0657.

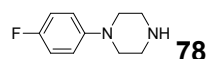

#### 1-(4-fluorophenyl)piperazine **78**

**78** was prepared according to the general procedure, and purified by neutral alumina column ( $\text{CH}_2\text{Cl}_2$ : MeOH = 20:1) to furnish the desired compound **78** as white solid. m. p. 30.9-32.8 °C; IR (KBr)  $\nu_{\text{max}}$ : 3269, 3051, 2948, 2826, 2802, 1509, 1452, 1237, 1144, 823, 818, 715  $\text{cm}^{-1}$ .  $^1\text{H}$  NMR (400 MHz,  $\text{DMSO-}d_6$ )  $\delta$  7.03 (t,  $J$  = 8.9 Hz, 2H), 6.96 – 6.71 (m, 2H), 2.97 (d,  $J$  = 7.2 Hz, 4H), 2.83 (dd,  $J$  = 6.3, 3.7 Hz, 4H), 2.43 (s, 1H).  $^{13}\text{C}$  NMR (100 MHz,  $\text{DMSO-}d_6$ )  $\delta$  156.4 (d,  $J$  = 235.4 Hz), 149.1, 117.4 (d,  $J$  = 6.8 Hz), 115.6 (d,  $J$  = 21.8 Hz), 50.7, 46.1.  $^{19}\text{F}$  NMR (376 MHz,  $\text{DMSO-}d_6$ )  $\delta$  -125.9. HRMS (ESI) calculated for  $\text{C}_{10}\text{H}_{13}\text{FN}_2\text{Na}^+$   $[\text{M}+\text{Na}]^+$ : 203.0955, found 203.0959.

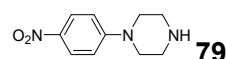

#### 1-(4-nitrophenyl)piperazine **79**

**79** was prepared according to the general procedure, and purified by neutral alumina column ( $\text{CH}_2\text{Cl}_2$ : MeOH = 20:1) to furnish the desired compound **79** as yellow solid. m. p. 131.1-133.0 °C; IR (KBr)  $\nu_{\text{max}}$ : 3338, 2921, 1601, 1456, 1314, 1251, 1104, 841, 667  $\text{cm}^{-1}$ .  $^1\text{H}$  NMR (400 MHz,  $\text{DMSO-}d_6$ )  $\delta$  8.30 – 7.70 (m, 2H), 7.08 – 6.91 (m, 2H), 3.43 – 3.32 (m, 4H), 2.86 – 2.76 (m, 4H).  $^{13}\text{C}$  NMR (100 MHz,  $\text{DMSO-}d_6$ )  $\delta$  155.5, 137.0, 126.2, 112.8, 48.0, 45.8. HRMS (ESI) calculated for  $\text{C}_{10}\text{H}_{13}\text{N}_3\text{NaO}_2^+$   $[\text{M}+\text{Na}]^+$ : 230.0900, found 230.0902.

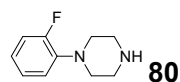

#### 1-(2-fluorophenyl)piperazine **80**

**80** was prepared according to the general procedure, and purified by neutral alumina column ( $\text{CH}_2\text{Cl}_2$ : MeOH = 20:1) to furnish the desired compound **80** as white solid. m. p. 45.4-47.2 °C; IR (KBr)  $\nu_{\text{max}}$ : 3273, 3059, 2977, 2842, 2799, 1523, 1474, 1239, 1143, 845, 812, 718  $\text{cm}^{-1}$ .  $^1\text{H}$  NMR (400 MHz,  $\text{DMSO-}d_6$ )  $\delta$  7.22 – 7.04 (m, 2H), 7.05 – 6.91 (m, 2H),

2.97 – 2.78 (m, 8H), 2.52 – 2.14 (m, 1H).  $^{13}\text{C}$  NMR (100 MHz,  $\text{DMSO-}d_6$ )  $\delta$  155.5 (d,  $J$  = 244.1 Hz), 141.1 (d,  $J$  = 7.7 Hz), 125.2 (d,  $J$  = 3.3 Hz), 122.5 (d,  $J$  = 8.5 Hz), 119.5, 116.3 (d,  $J$  = 20.7 Hz), 52.0 (d,  $J$  = 3.1 Hz), 46.2.  $^{19}\text{F}$  NMR (376 MHz,  $\text{DMSO-}d_6$ )  $\delta$  -122.9. HRMS (ESI) calculated for  $\text{C}_{10}\text{H}_{13}\text{FN}_2\text{Na}^+$   $[\text{M}+\text{Na}]^+$ : 203.0955, found 203.0952.

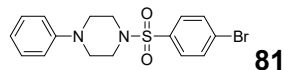

#### 1-((4-bromophenyl)sulfonyl)-4-phenylpiperazine **81**

**81** was prepared according to the general procedure, and purified by chromatography on silica gel (petroleum ether: ethyl acetate = 10:1) to furnish the desired compound **81** as a white solid. m. p. 181.7-183.4 °C; IR (KBr)  $\nu_{\text{max}}$ : 2887, 2361, 1599, 1389, 1172, 954, 754, 565  $\text{cm}^{-1}$ .  $^1\text{H}$  NMR (400 MHz, Chloroform- $d$ )  $\delta$  7.73 – 7.61 (m, 4H), 7.28 – 7.23 (m, 2H), 6.94 – 6.83 (m, 3H), 3.24 (dd,  $J$  = 6.2, 3.3 Hz, 4H), 3.20 – 3.14 (m, 4H).  $^{13}\text{C}$  NMR (100 MHz, Chloroform- $d$ )  $\delta$  150.6, 134.6, 132.5, 129.3 (d,  $J$  = 4.3 Hz), 128.2, 121.0, 117.0, 49.2, 46.1, 29.7. HRMS (ESI) calculated for  $\text{C}_{16}\text{H}_{17}\text{BrN}_2\text{NaO}_2\text{S}^+$   $[\text{M}+\text{Na}]^+$ : 403.0086, found 403.0084.

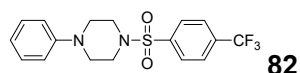

#### 1-phenyl-4-((4-(trifluoromethyl)phenyl)sulfonyl)piperazine **82**

**82** was prepared according to the general procedure, and purified by chromatography on silica gel (petroleum ether: ethyl acetate = 8:1) to furnish the desired compound **82** as a white solid. m. p. 171.1-172.8 °C; IR (KBr)  $\nu_{\text{max}}$ : 3018, 2829, 1598, 1394, 1197, 946, 767, 550  $\text{cm}^{-1}$ .  $^1\text{H}$  NMR (400 MHz, Chloroform- $d$ )  $\delta$  7.92 (d,  $J$  = 8.2 Hz, 2H), 7.81 (d,  $J$  = 8.3 Hz, 2H), 7.32 – 7.15 (m, 2H), 7.04 – 6.70 (m, 3H), 3.35 – 3.11 (m, 8H).  $^{13}\text{C}$  NMR (100 MHz, Chloroform- $d$ )  $\delta$  150.6, 139.3, 134.7 (q,  $J$  = 33.2 Hz), 128.8 (d,  $J$  = 95.8 Hz), 126.8 – 125.6 (m), 124.6, 121.9, 121.0, 117.0, 49.2, 46.1.  $^{19}\text{F}$  NMR (376 MHz, Chloroform- $d$ )  $\delta$  -63.1. HRMS (ESI) calculated for  $\text{C}_{17}\text{H}_{17}\text{F}_3\text{N}_2\text{NaO}_2\text{S}^+$   $[\text{M}+\text{Na}]^+$ : 393.0855, found 393.0852.

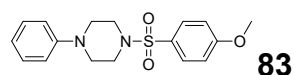

#### 1-((4-methoxyphenyl)sulfonyl)-4-phenylpiperazine **83**

**83** was prepared according to the general procedure, and purified by chromatography on silica gel (petroleum ether: ethyl acetate = 10:1) to furnish the desired compound **83** as a white solid. m. p. 167.4-169.1 °C; IR (KBr)  $\nu_{\text{max}}$ : 2886, 2301, 1596, 1499, 1309, 1160, 949, 695, 559  $\text{cm}^{-1}$ .  $^1\text{H}$  NMR (400 MHz,  $\text{DMSO-}d_6$ )  $\delta$  7.73 – 7.68 (m, 2H), 7.24 – 7.14 (m, 4H), 6.96 – 6.84 (m, 2H), 6.84 – 6.74 (m, 1H), 3.86 (s, 3H), 3.26 – 3.15 (m, 4H), 2.98 (dd,  $J$  = 6.2, 3.8 Hz, 4H).  $^{13}\text{C}$  NMR (100 MHz,  $\text{DMSO-}d_6$ )  $\delta$  163.4, 150.8, 130.4, 129.4, 126.6, 120.1, 116.6, 115.1, 56.2, 48.4, 46.3. HRMS (ESI) calculated for  $\text{C}_{17}\text{H}_{20}\text{N}_2\text{NaO}_3\text{S}^+$   $[\text{M}+\text{Na}]^+$ : 355.1087, found 355.1084.

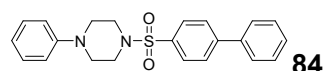

#### 1-([1,1'-biphenyl]-4-ylsulfonyl)-4-phenylpiperazine **84**

**84** was prepared according to the general procedure, and purified by chromatography on silica gel (petroleum ether: ethyl acetate = 5:1) to furnish the desired compound **84** as a white solid. m. p. 209.7-211.3 °C; IR (KBr)  $\nu_{\text{max}}$ : 2830, 2361, 1596, 1393, 1165, 946, 767, 580  $\text{cm}^{-1}$ .  $^1\text{H}$  NMR (400 MHz, Chloroform-*d*)  $\delta$  7.86 (d,  $J$  = 8.1 Hz, 2H), 7.75 (d,  $J$  = 8.0 Hz, 2H), 7.60 (d,  $J$  = 7.6 Hz, 2H), 7.52 – 7.41 (m, 3H), 7.26 (s, 2H), 6.88 (d,  $J$  = 8.4 Hz, 3H), 3.25 (dq,  $J$  = 9.7, 4.2 Hz, 8H).  $^{13}\text{C}$  NMR (100 MHz, Chloroform-*d*)  $\delta$  146.0, 139.2, 134.0, 129.2, 129.1, 128.6, 128.4, 127.8, 127.4, 120.9, 116.9, 100.0, 49.2, 46.1. HRMS (ESI) calculated for  $\text{C}_{22}\text{H}_{22}\text{N}_2\text{NaO}_2\text{S}^+$   $[\text{M}+\text{Na}]^+$ : 401.1294, found 401.1299.

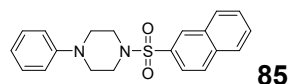

#### 1-(naphthalen-2-ylsulfonyl)-4-phenylpiperazine **85**

**85** was prepared according to the general procedure, and purified by chromatography on silica gel (petroleum ether: ethyl acetate = 10:1) to furnish the desired compound **85** as a pink solid. m. p. 136.3-138.1 °C; IR (KBr)  $\nu_{\text{max}}$ : 2888, 2361, 1597, 1345, 1233, 954, 766, 548  $\text{cm}^{-1}$ .  $^1\text{H}$  NMR (400 MHz, Chloroform-*d*)  $\delta$  8.36 (d,  $J$  = 1.8 Hz, 1H), 7.94 (dd,  $J$  = 8.2, 3.3 Hz, 2H), 7.87 (dd,  $J$  = 7.6, 1.7 Hz, 1H), 7.76 (dd,  $J$  = 8.6, 1.9 Hz, 1H), 7.59 (pd,  $J$  = 6.9, 1.5 Hz, 2H), 7.24 – 7.16 (m, 2H), 6.94 – 6.71 (m, 3H), 3.29 – 3.08 (m, 8H).  $^{13}\text{C}$  NMR (100 MHz, Chloroform-*d*)  $\delta$  150.7, 132.6, 129.4, 129.3, 129.3, 129.0, 128.0, 123.1, 120.8, 116.9, 49.2, 46.2. HRMS (ESI) calculated for  $\text{C}_{20}\text{H}_{20}\text{N}_2\text{NaO}_2\text{S}^+$   $[\text{M}+\text{Na}]^+$ : 375.1138, found 375.1134.

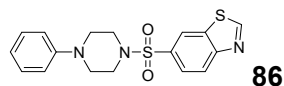

#### 6-((4-phenylpiperazin-1-yl)sulfonyl)benzo[d]thiazole **86**

**86** was prepared according to the general procedure A, and purified by chromatography on silica gel ( $\text{CH}_2\text{Cl}_2$ ) to furnish the desired compound **86** as a white solid. m. p. 195.5-196.9 °C; IR (KBr)  $\nu_{\text{max}}$ : 2826, 1598, 1503, 1241, 1119, 1101, 951, 685, 527  $\text{cm}^{-1}$ .  $^1\text{H}$  NMR (400 MHz, DMSO-*d*<sub>6</sub>)  $\delta$  9.69 (d,  $J$  = 4.2 Hz, 1H), 8.78 (d,  $J$  = 4.0 Hz, 1H), 8.34 (dd,  $J$  = 8.5, 4.2 Hz, 1H), 7.91 (dd,  $J$  = 9.4, 3.8 Hz, 1H), 7.19 (q,  $J$  = 6.7, 5.9 Hz, 2H), 6.89 (dd,  $J$  = 8.1, 4.0 Hz, 2H), 6.80 (t,  $J$  = 6.2 Hz, 1H), 3.21 (d,  $J$  = 5.5 Hz, 4H), 3.08 (d,  $J$  = 5.8 Hz, 4H).  $^{13}\text{C}$  NMR (100 MHz, DMSO-*d*<sub>6</sub>)  $\delta$  161.8, 156.0, 150.8, 135.1, 132.0, 129.4, 125.6, 124.2, 124.0, 120.2, 116.6, 48.4, 46.4. HRMS (ESI) calculated for  $\text{C}_{17}\text{H}_{17}\text{N}_3\text{NaO}_2\text{S}_2^+$   $[\text{M}+\text{Na}]^+$ : 382.0660, found 382.0656.

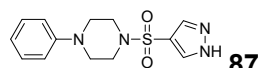

#### 1-((1H-pyrazol-4-yl)sulfonyl)-4-phenylpiperazine **87**

**87** was prepared according to the general procedure A, and purified by chromatography on silica gel (petroleum ether: ethyl acetate = 10:1) to furnish the desired compound **87** as a white solid. m. p. 259.1-260.3 °C; IR (KBr)  $\nu_{\text{max}}$ : 3137, 3121, 2834, 1600, 1502, 1393, 1241, 1143, 944, 751, 612  $\text{cm}^{-1}$ .  $^1\text{H}$  NMR (400 MHz, DMSO-*d*<sub>6</sub>)  $\delta$  13.83 (s, 1H), 8.42 (s, 1H), 7.88 (s, 1H), 7.21 (q,  $J$  = 6.6, 6.0 Hz, 2H), 6.92 (t,  $J$  = 6.0 Hz, 2H), 6.81 (t,  $J$  = 6.7 Hz, 1H),

3.22 (d,  $J = 6.4$  Hz, 4H), 2.96 (s, 4H).  $^{13}\text{C}$  NMR (100 MHz,  $\text{DMSO-}d_6$ )  $\delta$  150.8, 139.1, 132.1, 129.5, 120.1, 116.6, 115.6, 48.2, 46.1. HRMS (ESI) calculated for  $\text{C}_{13}\text{H}_{16}\text{N}_4\text{NaO}_2\text{S}^+$   $[\text{M}+\text{Na}]^+$ : 315.0892, found 315.0899.

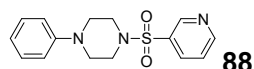

#### 1-phenyl-4-(pyridin-3-ylsulfonyl)piperazine **88**

**88** was prepared according to the general procedure A, and purified by chromatography on silica gel (petroleum ether: ethyl acetate = 1:1) to furnish the desired compound **88** as a white solid. m. p. 182.1-184.0 °C; IR (KBr)  $\nu_{\text{max}}$ : 3041, 2855, 1599, 1392, 1180, 946, 759, 579  $\text{cm}^{-1}$ .  $^1\text{H}$  NMR (400 MHz, Chloroform- $d$ )  $\delta$  9.03 (d,  $J = 2.2$  Hz, 1H), 8.85 (dd,  $J = 4.9$ , 1.6 Hz, 1H), 8.08 (dt,  $J = 8.1$ , 1.8 Hz, 1H), 7.52 (dd,  $J = 8.1$ , 4.8 Hz, 1H), 7.28 – 7.24 (m, 2H), 7.03 – 6.75 (m, 3H), 3.25 (h,  $J = 4.3$  Hz, 8H).  $^{13}\text{C}$  NMR (100 MHz, Chloroform- $d$ )  $\delta$  153.6, 150.5, 148.6, 135.4, 132.4, 129.3, 123.8, 121.1, 117.1, 49.2, 46.0. HRMS (ESI) calculated for  $\text{C}_{15}\text{H}_{17}\text{N}_3\text{NaO}_2\text{S}^+$   $[\text{M}+\text{Na}]^+$ : 326.0934, found 326.0937.

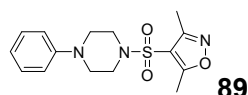

#### 3,5-dimethyl-4-((4-phenylpiperazin-1-yl)sulfonyl)isoxazole **89**

**89** was prepared according to the general procedure, and purified by chromatography on silica gel (petroleum ether: ethyl acetate = 5:1) to furnish the desired compound **89** as a white solid. m. p. 156.7-158.5 °C; IR (KBr)  $\nu_{\text{max}}$ : 2924, 2826, 1598, 1372, 1180, 946, 690, 533  $\text{cm}^{-1}$ .  $^1\text{H}$  NMR (400 MHz, Chloroform- $d$ )  $\delta$  7.27 (d,  $J = 8.1$  Hz, 2H), 6.92 (t,  $J = 6.6$  Hz, 3H), 3.28 (d,  $J = 3.0$  Hz, 8H), 2.68 (s, 3H), 2.44 (s, 3H).  $^{13}\text{C}$  NMR (100 MHz, Chloroform- $d$ )  $\delta$  173.9, 158.0, 150.5, 129.3, 121.2, 117.1, 113.1, 49.2, 45.5, 13.0, 11.4. HRMS (ESI) calculated for  $\text{C}_{15}\text{H}_{19}\text{N}_3\text{NaO}_3\text{S}^+$   $[\text{M}+\text{Na}]^+$ : 344.1039, found 344.1037.

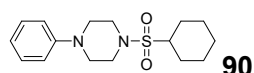

#### 1-(cyclohexylsulfonyl)-4-phenylpiperazine **90**

**90** was prepared according to the general procedure, and purified by chromatography on silica gel (petroleum ether: ethyl acetate = 8:1) to furnish the desired compound **90** as a white solid. m. p. 121.0-122.7 °C; IR (KBr)  $\nu_{\text{max}}$ : 2935, 2766, 2360, 1599, 1318, 1144, 971, 771, 582  $\text{cm}^{-1}$ .  $^1\text{H}$  NMR (400 MHz, Chloroform- $d$ )  $\delta$  7.24 (dd,  $J = 8.8$ , 7.0 Hz, 2H), 6.86 (dd,  $J = 8.2$ , 6.6 Hz, 3H), 3.58 – 3.39 (m, 4H), 3.24 – 3.07 (m, 4H), 2.92 (tt,  $J = 12.0$ , 3.5 Hz, 1H), 2.11 (dd,  $J = 12.6$ , 3.7 Hz, 2H), 1.82 (d,  $J = 2.9$  Hz, 2H), 1.66 (dt,  $J = 12.5$ , 3.2 Hz, 1H), 1.49 (qd,  $J = 12.4$ , 3.5 Hz, 2H), 1.21 (ddtd,  $J = 25.5$ , 15.9, 12.7, 3.4 Hz, 3H).  $^{13}\text{C}$  NMR (100 MHz, Chloroform- $d$ )  $\delta$  151.0, 129.2, 120.5, 116.9, 61.3, 50.0, 46.2, 26.7, 25.2. HRMS (ESI) calculated for  $\text{C}_{16}\text{H}_{24}\text{N}_2\text{NaO}_2\text{S}^+$   $[\text{M}+\text{Na}]^+$ : 331.1451, found 331.1450.

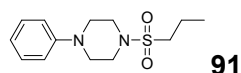

#### 1-phenyl-4-(propylsulfonyl)piperazine **91**

**91** was prepared according to the general procedure, and purified by chromatography on silica gel (petroleum ether: ethyl acetate = 6:1) to furnish the desired compound **91** as a white solid. m. p. 107.8-109.5 °C; IR (KBr)  $\nu_{\text{max}}$ : 2971, 2825, 2361, 1601, 1333, 1154, 908, 722, 574  $\text{cm}^{-1}$ .  $^1\text{H}$  NMR (400 MHz, Chloroform-*d*)  $\delta$  7.36 – 7.23 (m, 2H), 6.92 (t,  $J$  = 6.6 Hz, 3H), 3.42 (q,  $J$  = 5.2 Hz, 4H), 3.24 (t,  $J$  = 5.2 Hz, 4H), 2.91 (dt,  $J$  = 10.7, 5.7 Hz, 2H), 1.98 – 1.80 (m, 2H), 1.07 (q,  $J$  = 6.9 Hz, 3H).  $^{13}\text{C}$  NMR (100 MHz, Chloroform-*d*)  $\delta$  150.8, 129.3, 120.8, 117.0, 50.9, 49.7, 45.8, 16.9, 13.2. HRMS (ESI) calculated for  $\text{C}_{13}\text{H}_{20}\text{N}_2\text{NaO}_2\text{S}^+$   $[\text{M}+\text{Na}]^+$ : 291.1138, found 291.1136.

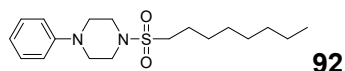

#### 1-(octylsulfonyl)-4-phenylpiperazine **92**

**92** was prepared according to the general procedure, and purified by chromatography on silica gel (petroleum ether: ethyl acetate = 5:1) to furnish the desired compound **92** as a white solid. m. p. 102.1-103.7 °C; IR (KBr)  $\nu_{\text{max}}$ : 2920, 2851, 2361, 1601, 1383, 872, 721, 537  $\text{cm}^{-1}$ .  $^1\text{H}$  NMR (400 MHz, Chloroform-*d*)  $\delta$  7.30 (d,  $J$  = 7.7 Hz, 2H), 6.94 (d,  $J$  = 8.1 Hz, 3H), 3.44 (t,  $J$  = 4.8 Hz, 4H), 3.25 (t,  $J$  = 4.9 Hz, 4H), 3.04 – 2.84 (m, 2H), 1.84 (p,  $J$  = 7.7 Hz, 2H), 1.49 – 1.23 (m, 11H), 0.88 (s, 2H).  $^{13}\text{C}$  NMR (100 MHz, Chloroform-*d*)  $\delta$  150.8, 129.3, 120.9, 117.0, 49.7, 49.3, 45.8, 31.7, 29.1, 29.0, 28.5, 23.0, 22.6, 14.1. HRMS (ESI) calculated for  $\text{C}_{18}\text{H}_{30}\text{N}_2\text{NaO}_2\text{S}^+$   $[\text{M}+\text{Na}]^+$ : 361.1920, found 361.1921.

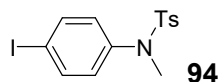

#### N-(4-iodophenyl)-N,4-dimethylbenzenesulfonamide **94**

**94** was prepared according to the general procedure **A**, and purified by chromatography on silica gel (petroleum ether: ethyl acetate = 12:1) to furnish the desired compound **94** (74 % yield) as a yellow solid. m. p. 92.5-94.1 °C; IR (KBr)  $\nu_{\text{max}}$ : 3032, 2874, 1592, 1484, 1261, 1153, 1066, 1001, 864, 722, 701, 663  $\text{cm}^{-1}$ .  $^1\text{H}$  NMR (400 MHz, Chloroform-*d*)  $\delta$  7.66 – 7.57 (m, 2H), 7.43 – 7.40 (m, 2H), 7.27 – 7.24 (m, 2H), 6.91 – 6.78 (m, 2H), 3.12 (s, 3H), 2.42 (s, 3H).  $^{13}\text{C}$  NMR (100 MHz, Chloroform-*d*)  $\delta$  141.9, 141.5, 138.0, 133.1, 129.5, 128.4, 127.8, 92.3, 37.8, 21.6. HRMS (ESI) calculated for  $\text{C}_{14}\text{H}_{14}\text{I}\text{N}\text{NaO}_2\text{S}^+$   $[\text{M}+\text{Na}]^+$ : 409.9688, found 409.9691.

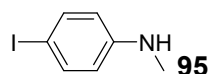

#### 4-iodo-N-methylaniline **95**

**95** was prepared according to the general procedure, and purified by chromatography on silica gel (petroleum ether: ethyl acetate = 10:1) to furnish the desired compound **95** as a yellow oil; IR (KBr)  $\nu_{\text{max}}$ : 3416, 3185, 2980, 2879, 2571, 2385, 2118, 1872, 1590, 1432, 1389, 1314, 1292, 1180, 1100, 993, 807, 743, 686  $\text{cm}^{-1}$ .  $^1\text{H}$  NMR (400 MHz, Chloroform-*d*)  $\delta$  7.53 – 7.31 (m, 2H), 6.42 – 6.30 (m, 2H), 3.46 (s, 1H), 2.78 (s, 3H).  $^{13}\text{C}$  NMR (100 MHz, Chloroform-*d*)  $\delta$  148.9, 137.7, 114.6, 77.7, 30.6. HRMS (ESI) calculated for  $\text{C}_7\text{H}_8\text{I}\text{N}\text{Na}^+$   $[\text{M}+\text{Na}]^+$ : 255.9599, found 255.9597.



## 6. Mass analysis of intermediates

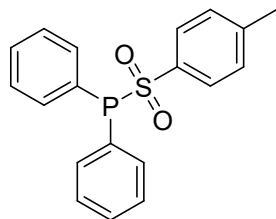

diphenyl(tosyl)phosphane

According to the general procedure can find  $\text{Ph}_2\text{PTs}$  as the side product in the reaction.

HRMS (ESI) calculated for  $\text{C}_{19}\text{H}_{17}\text{NaO}_2\text{PS}^+$   $[\text{M}+\text{Na}]^+$ : 363.0585, found 363.1631.

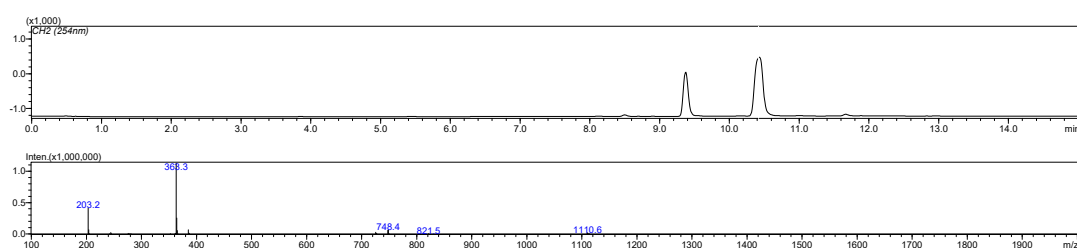

Figure S1. LC-MS of  $\text{Ph}_2\text{PTs}$

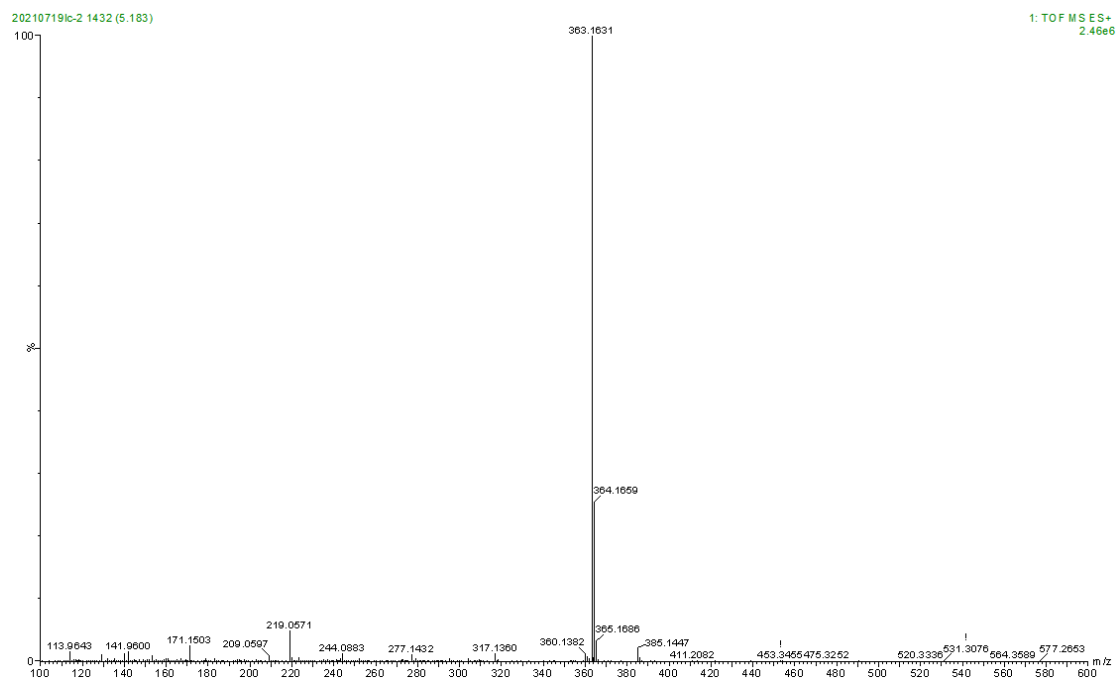

Figure S2. HR-MS of  $\text{Ph}_2\text{PTs}$

## 7. NMR Spectrums of Compounds

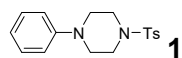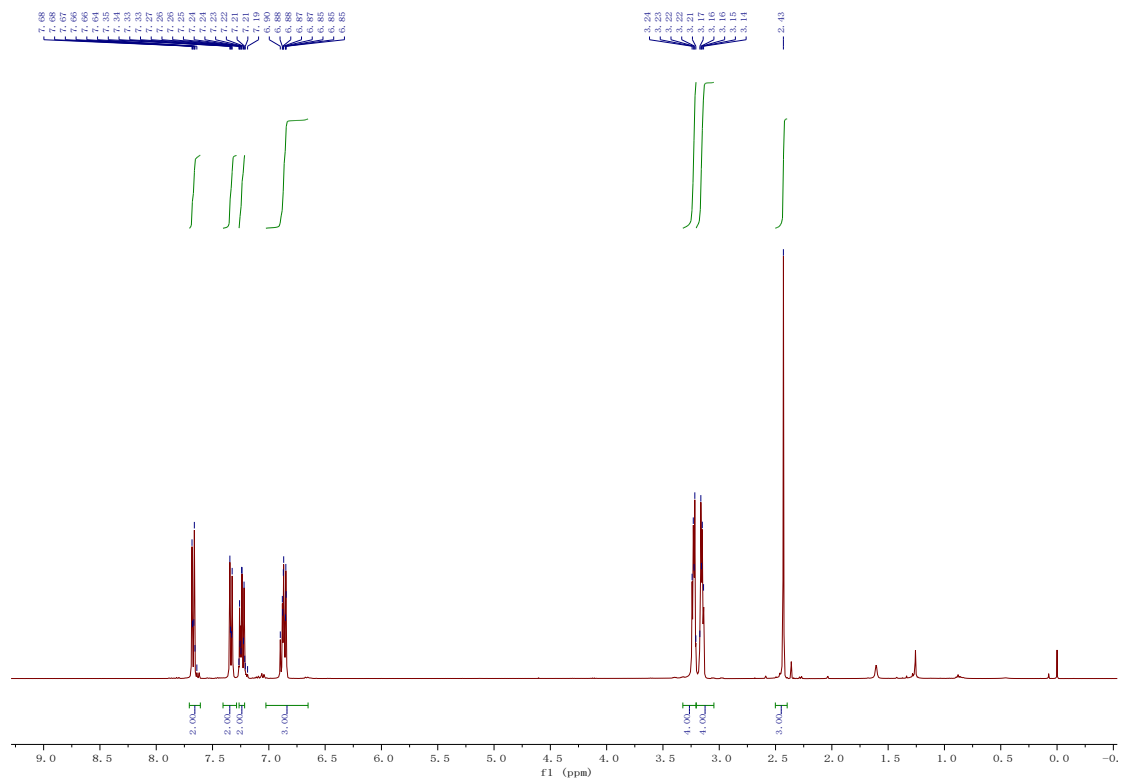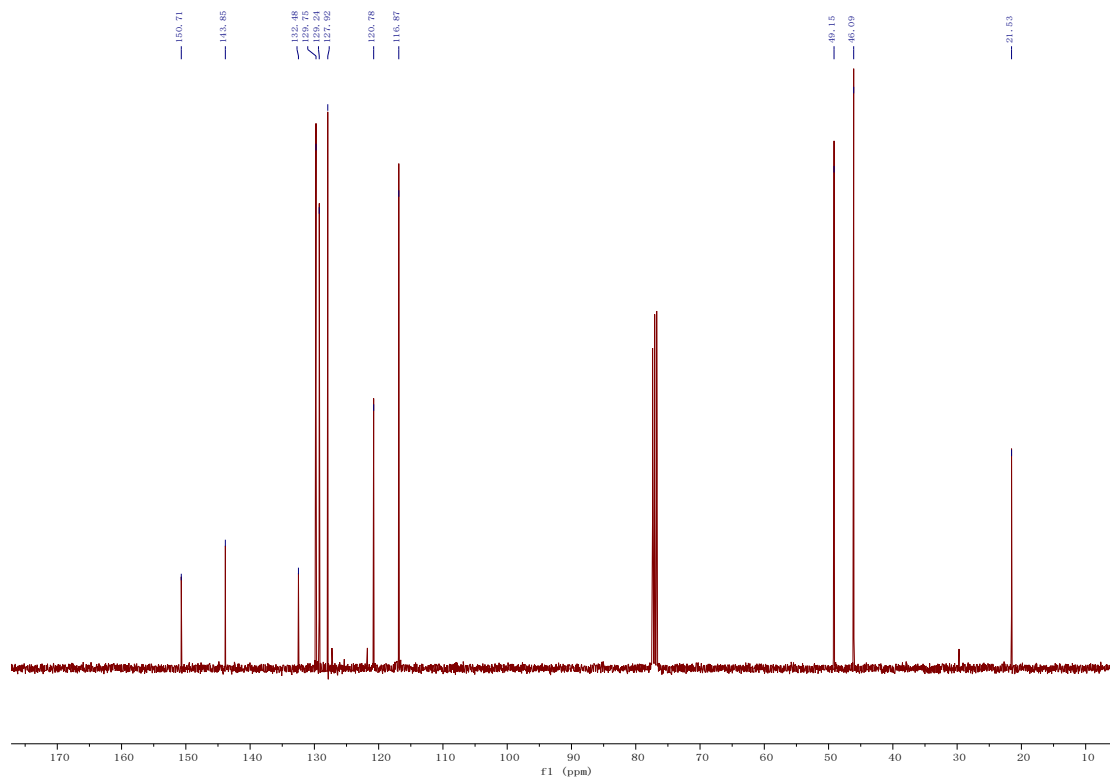

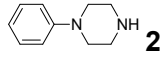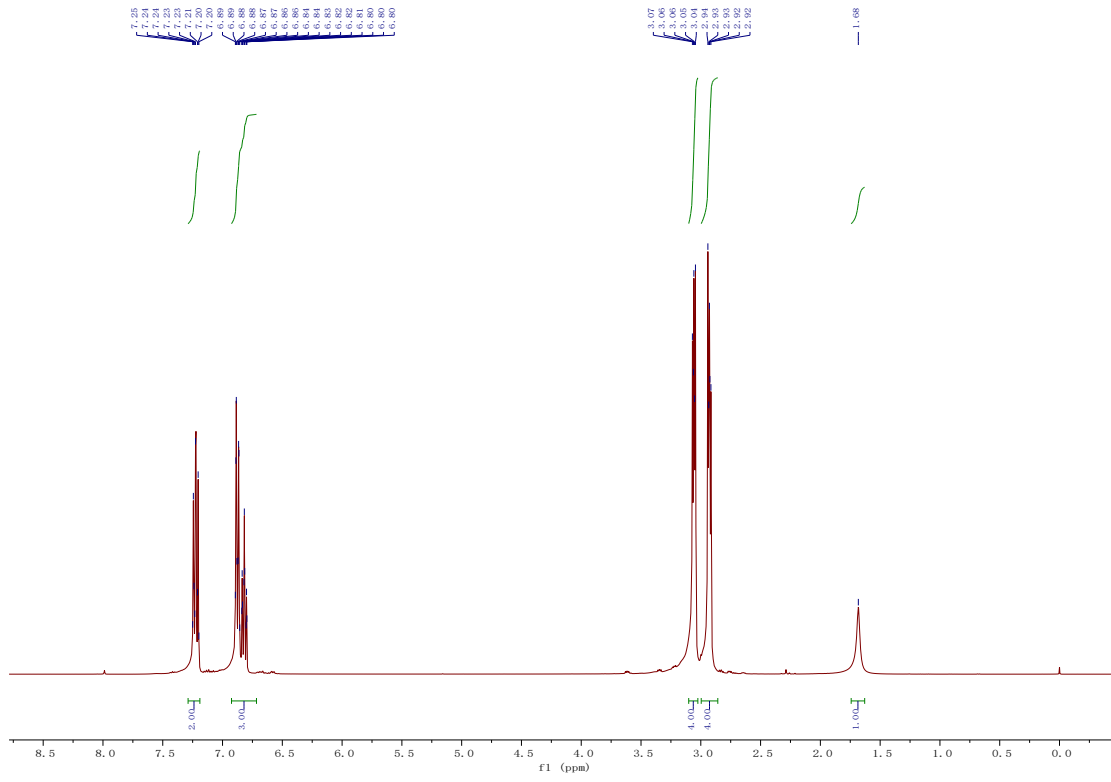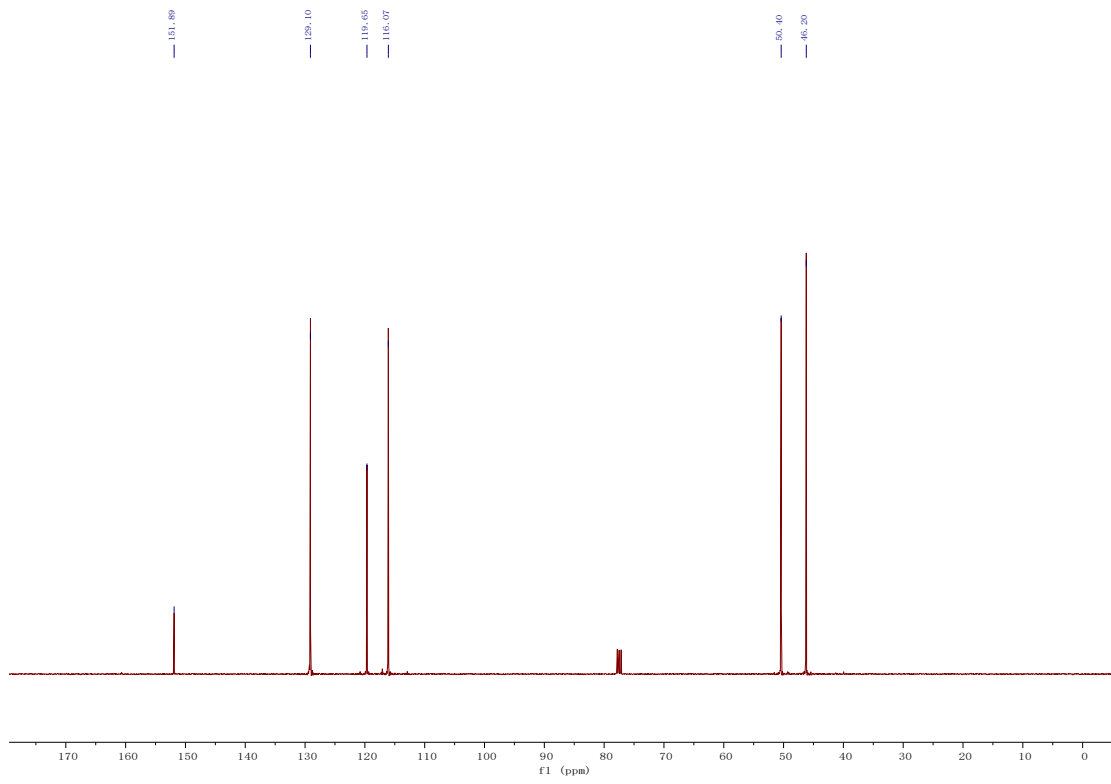





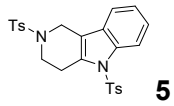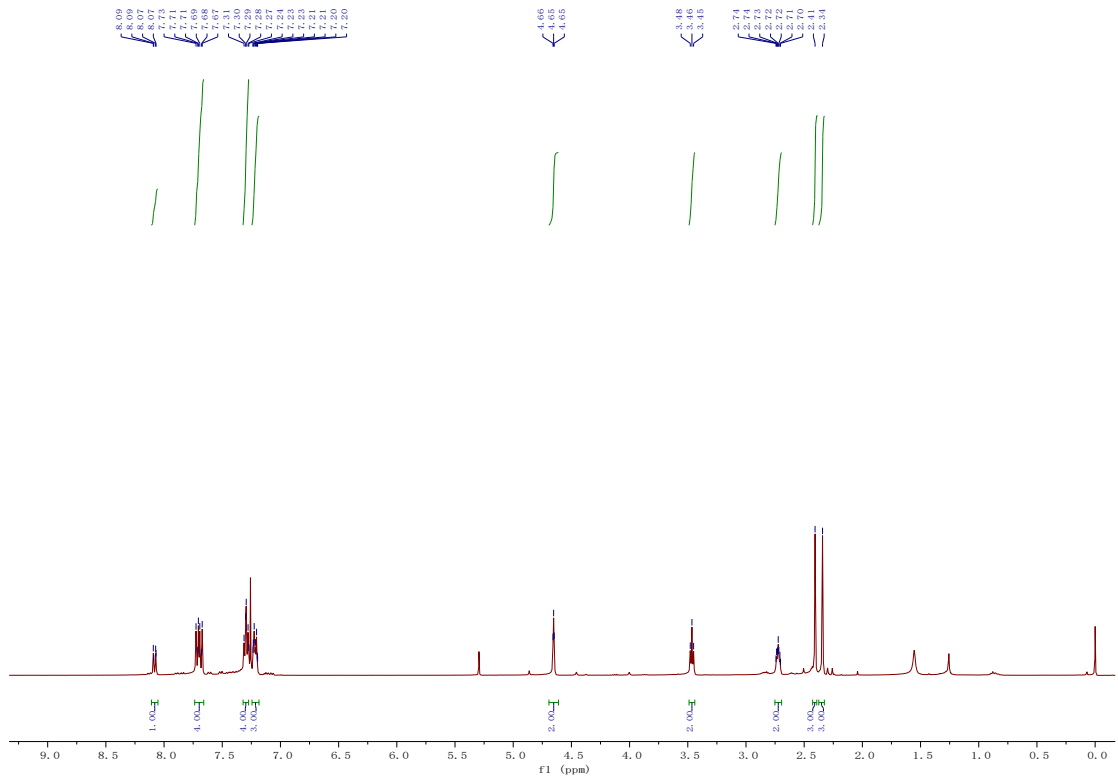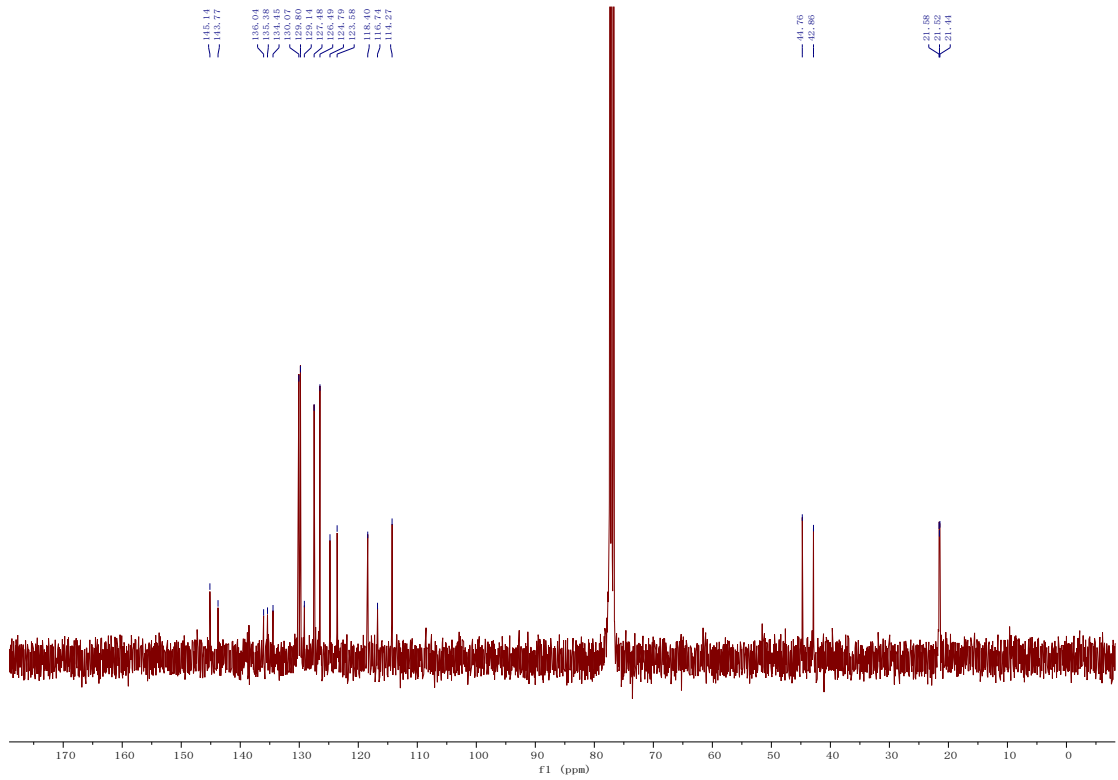

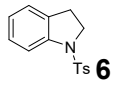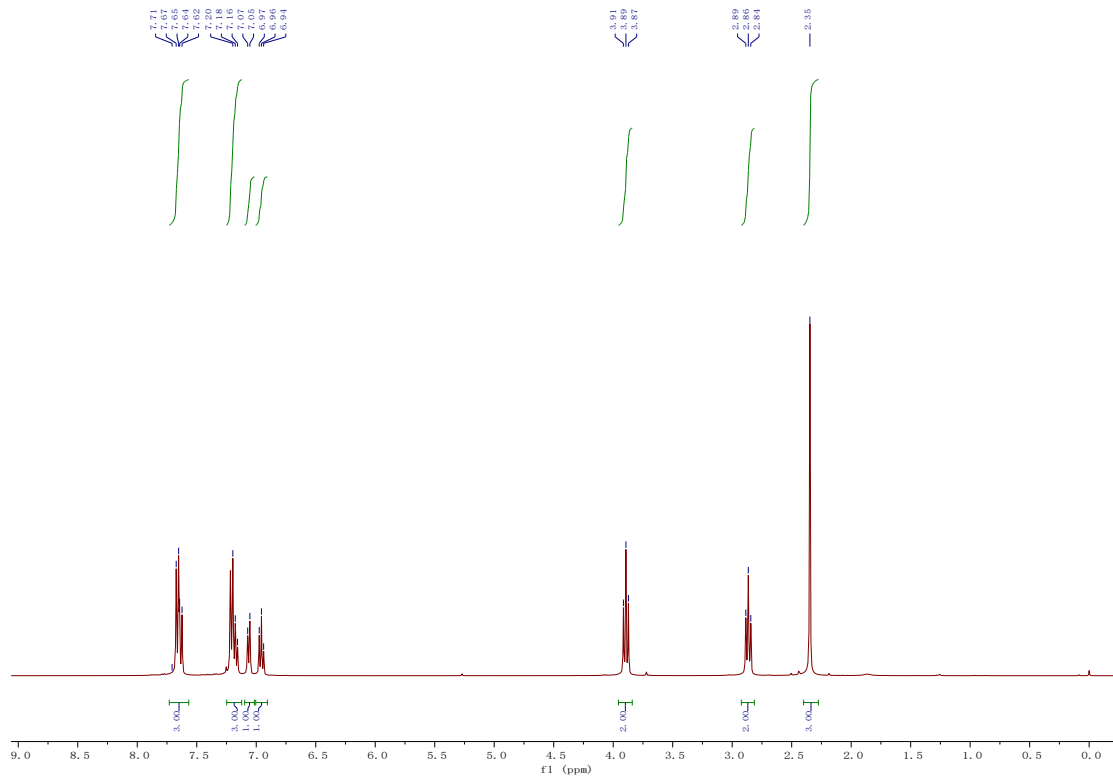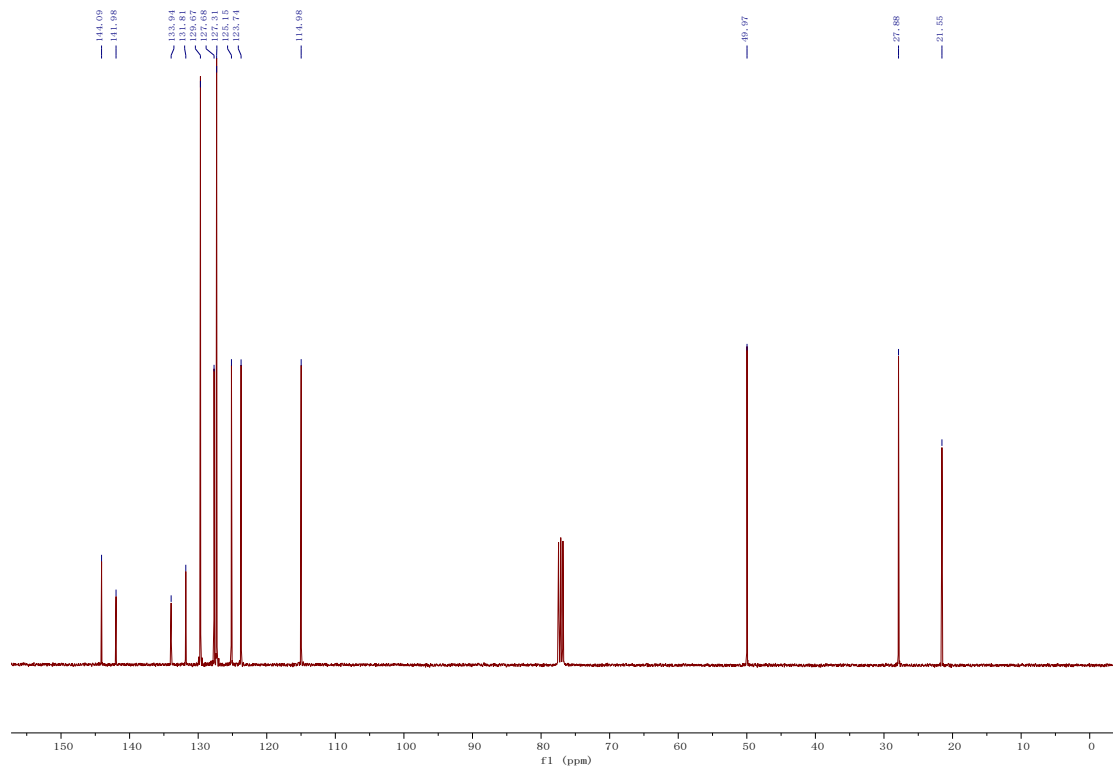

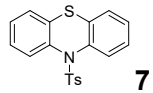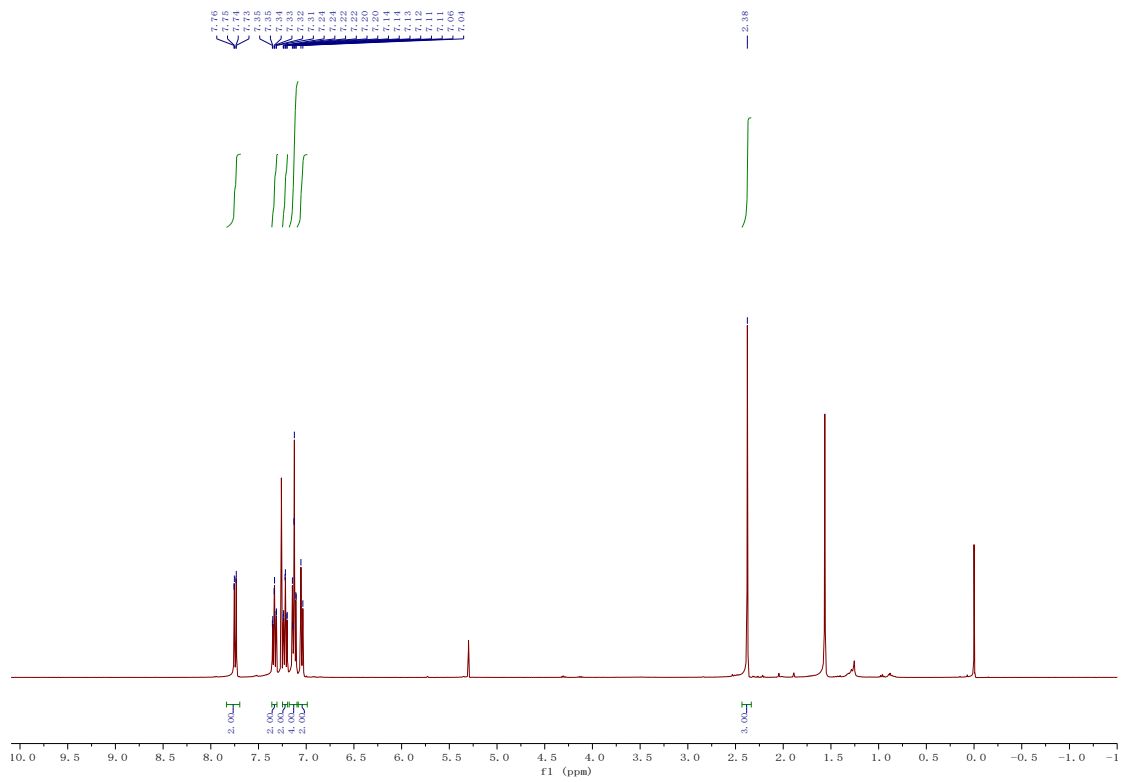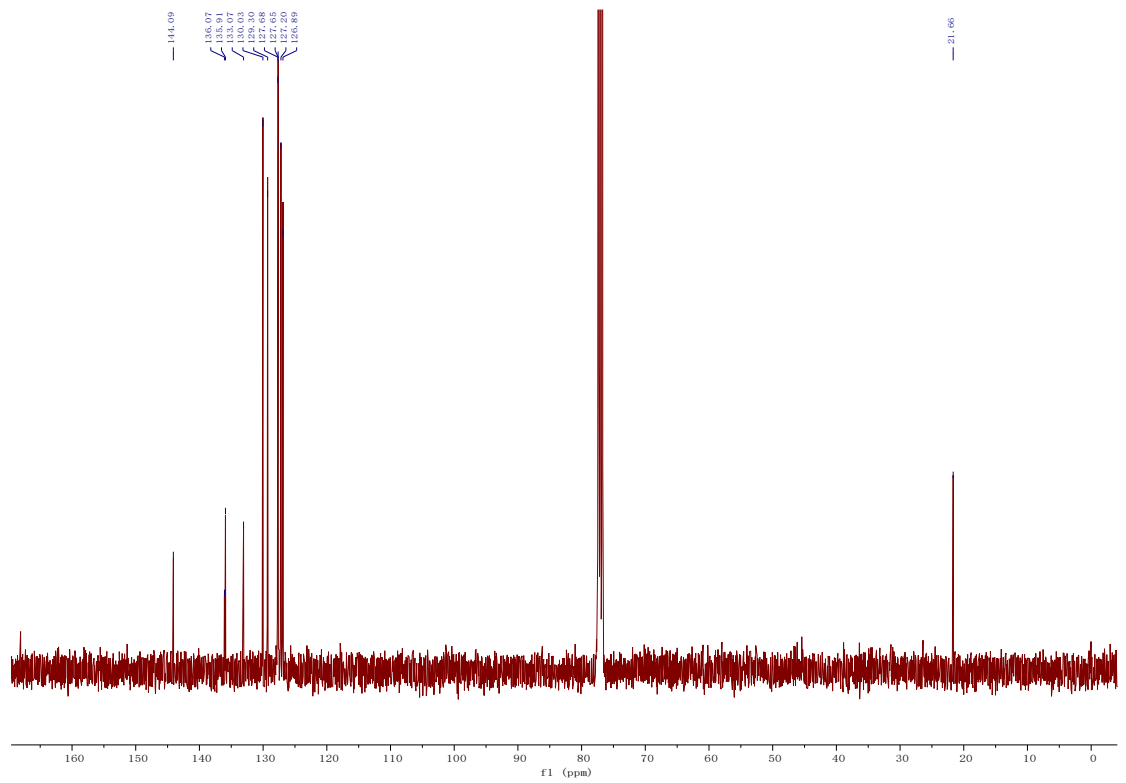





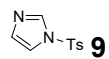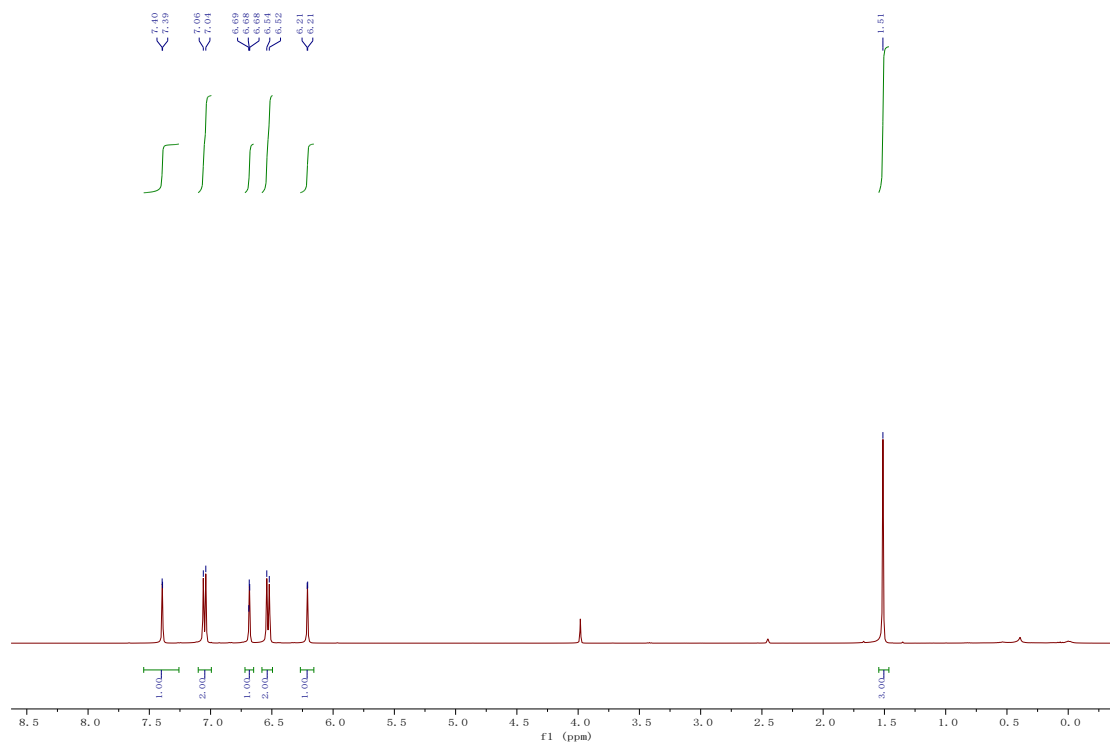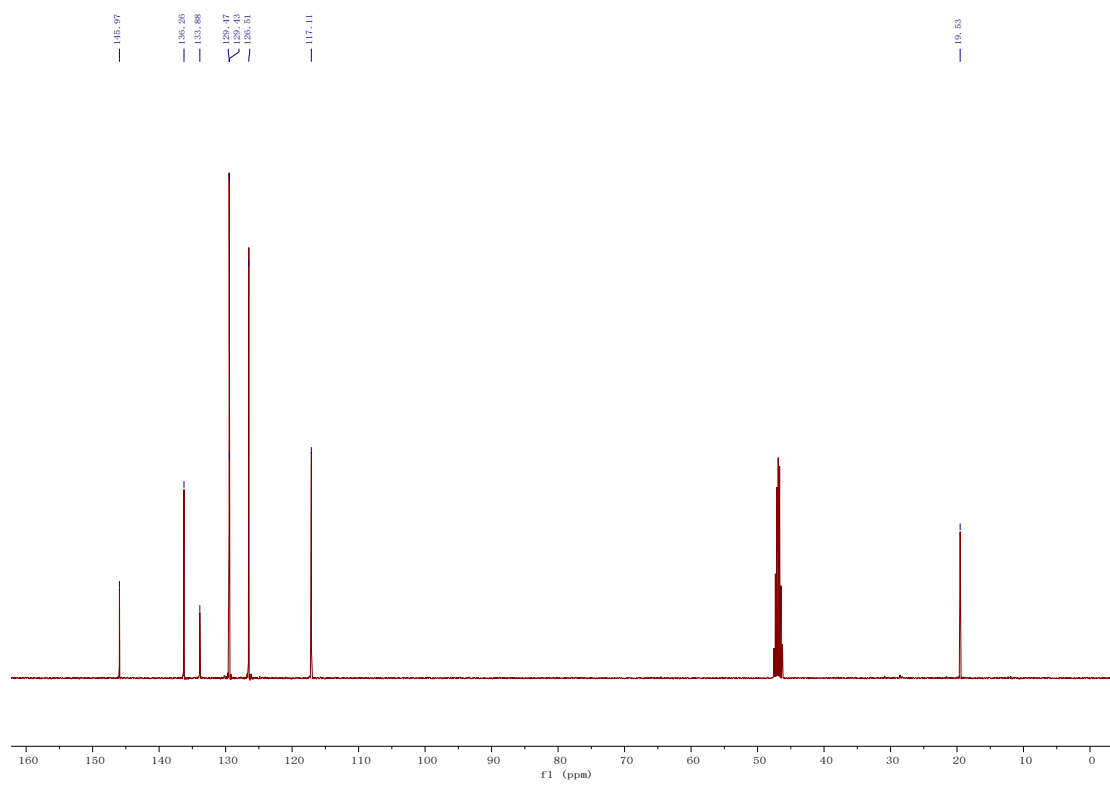

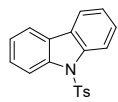

10

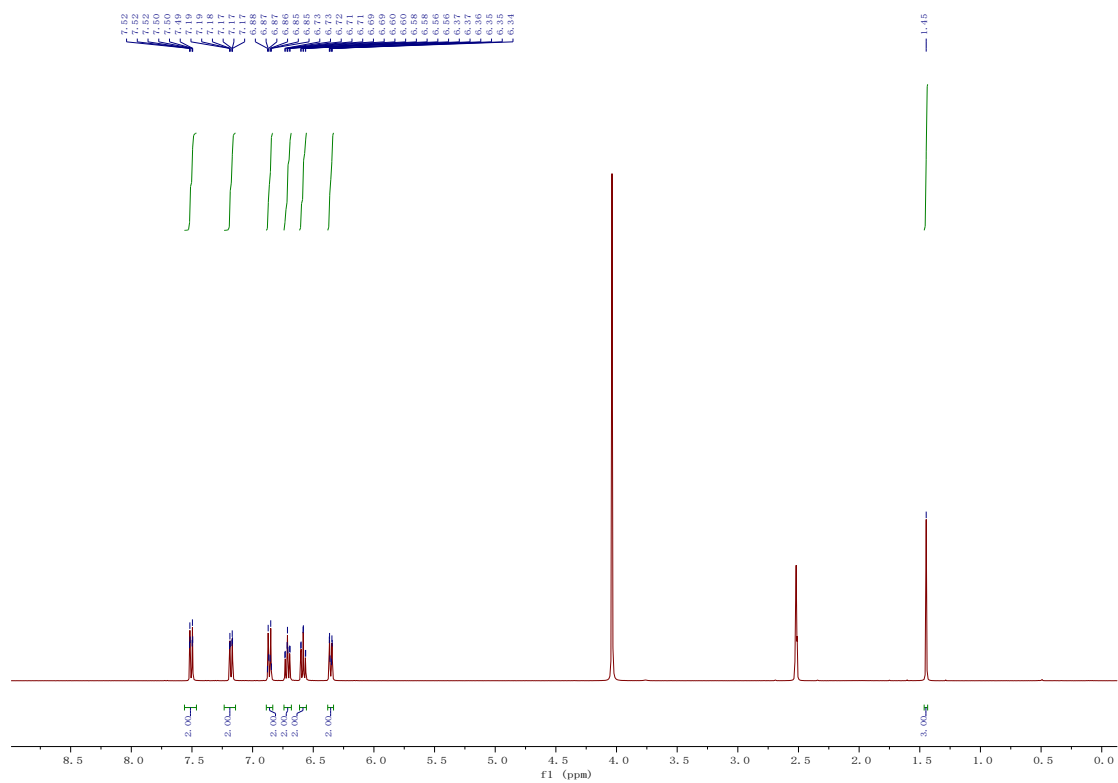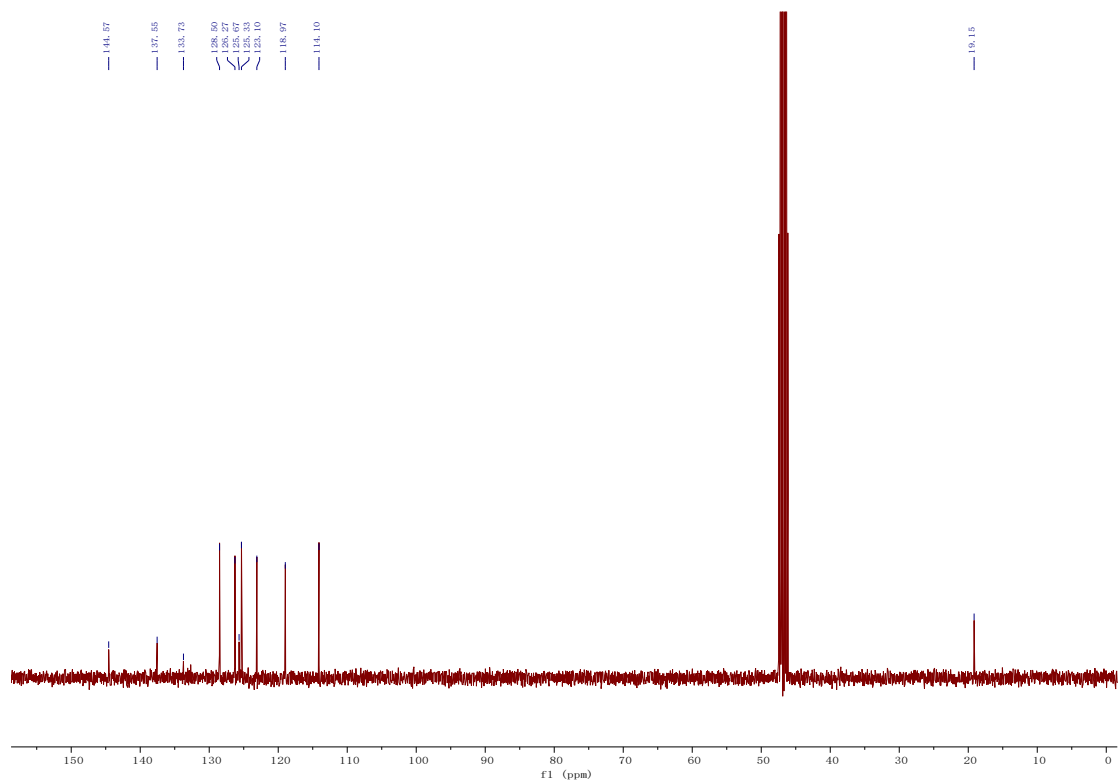



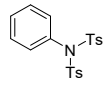

12

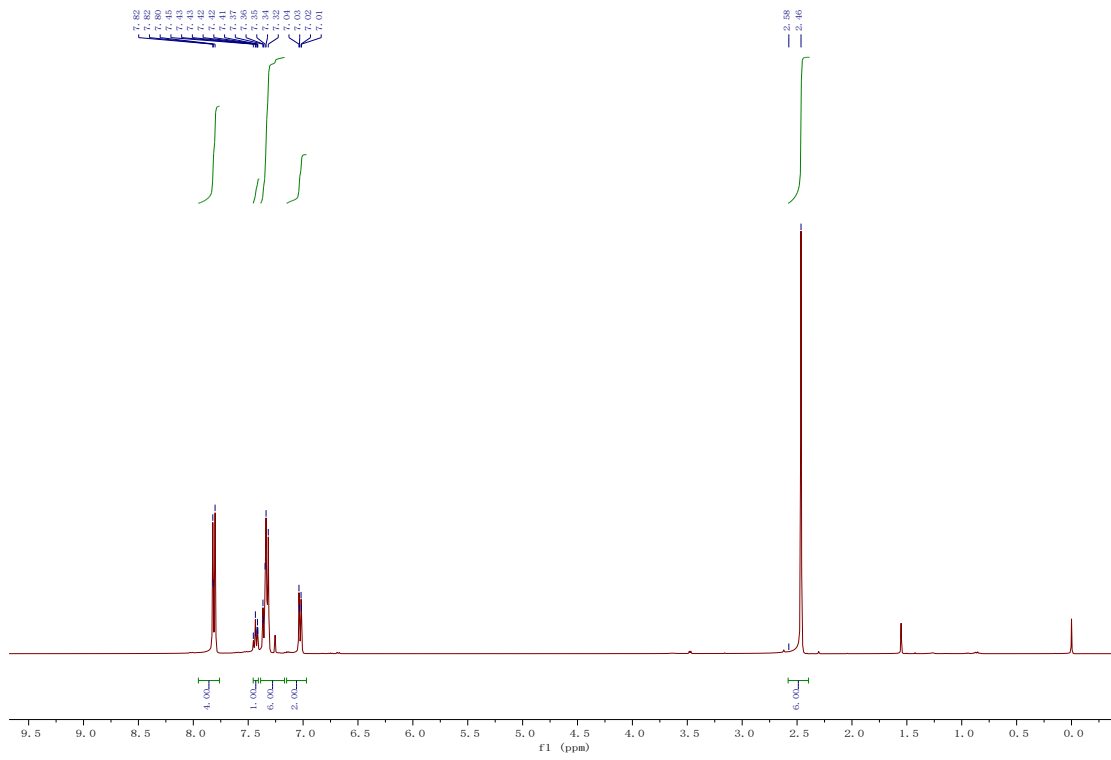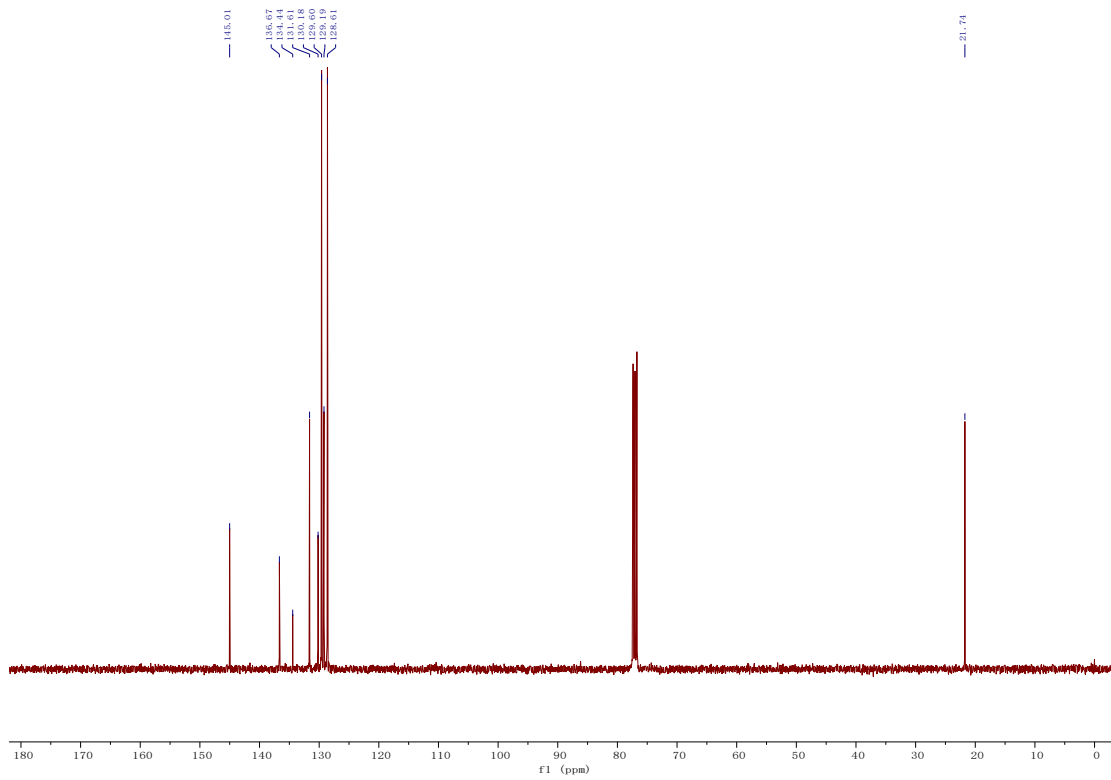

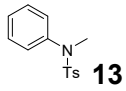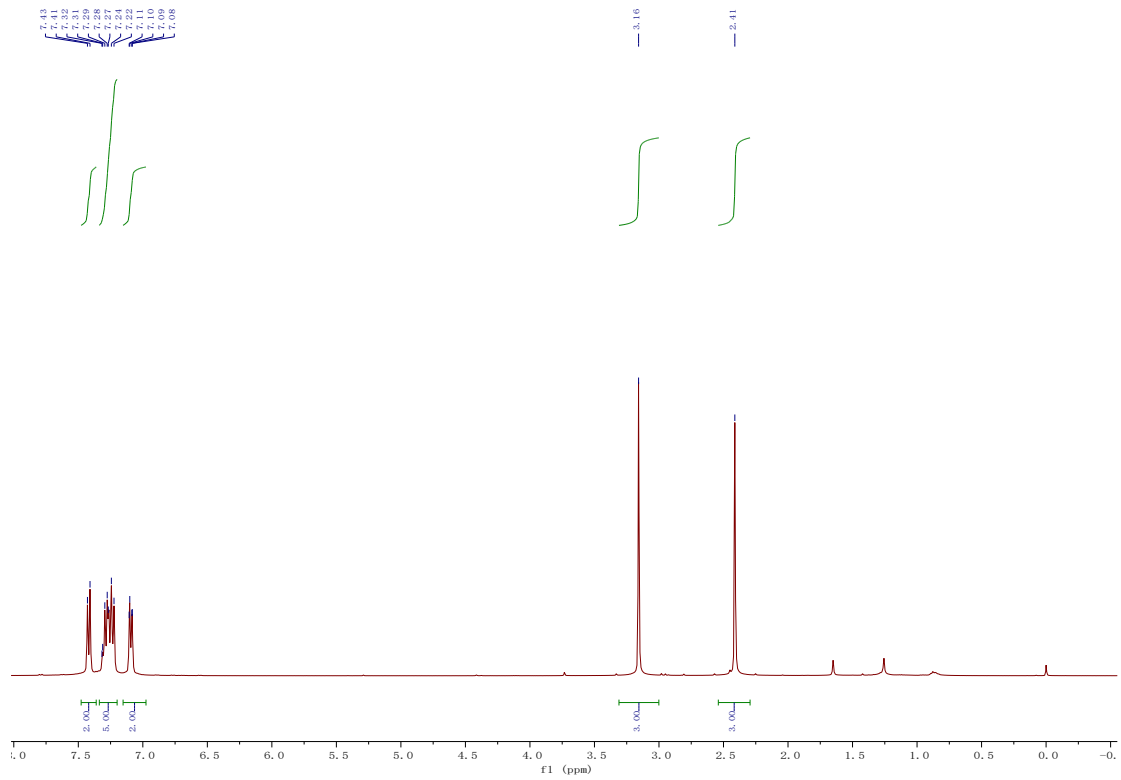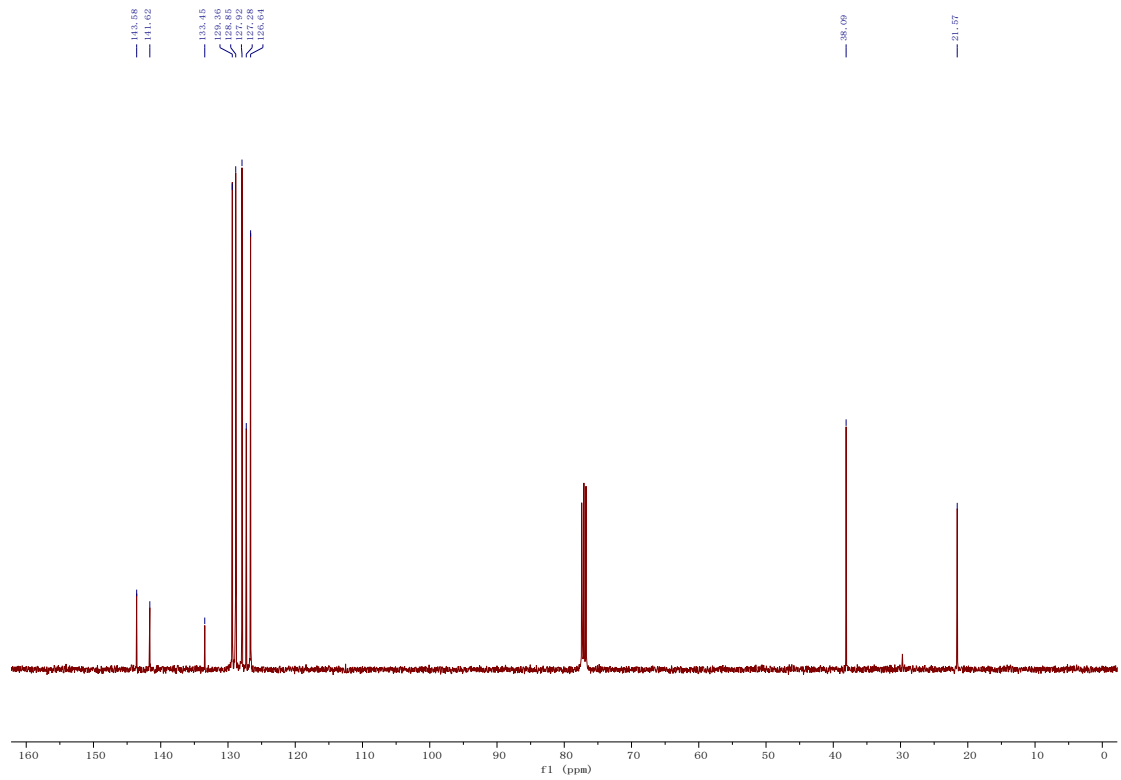



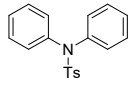

15

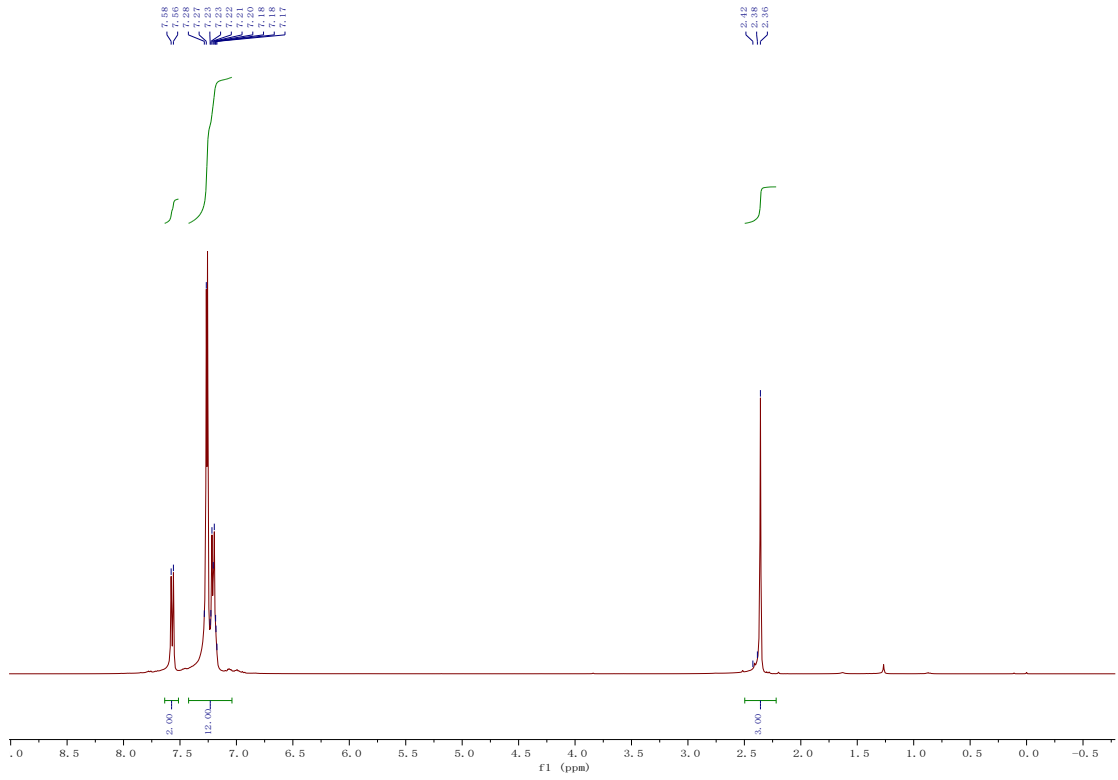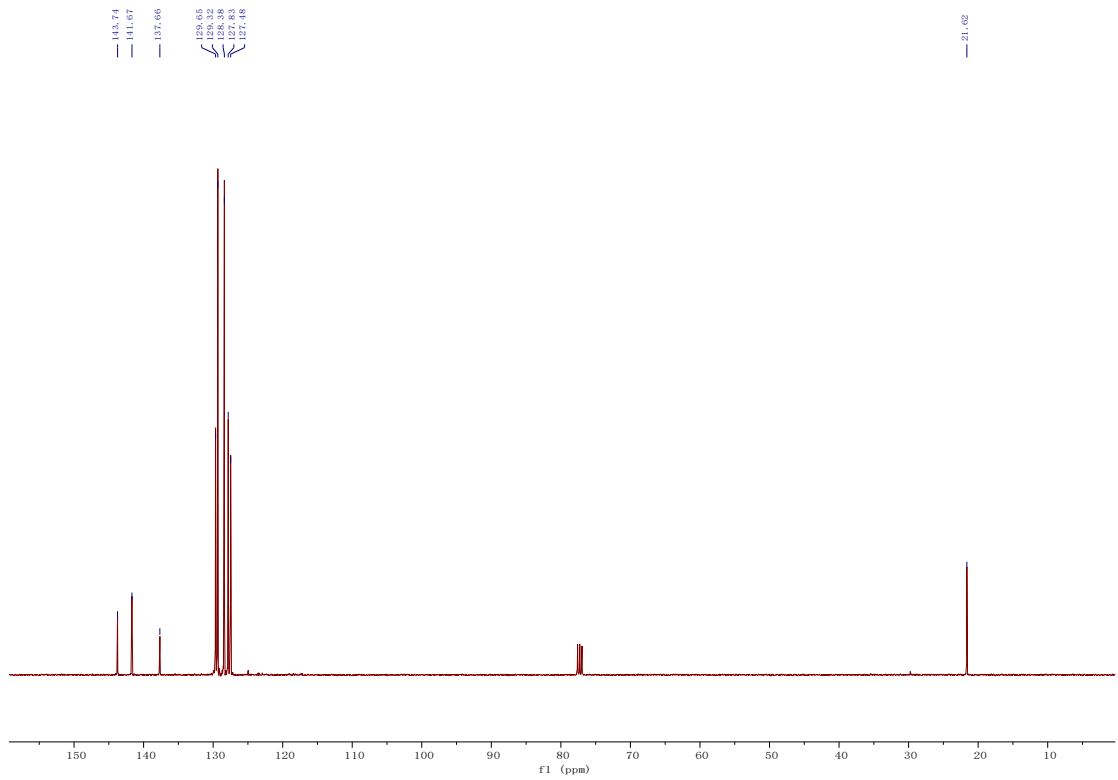



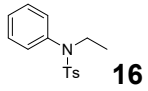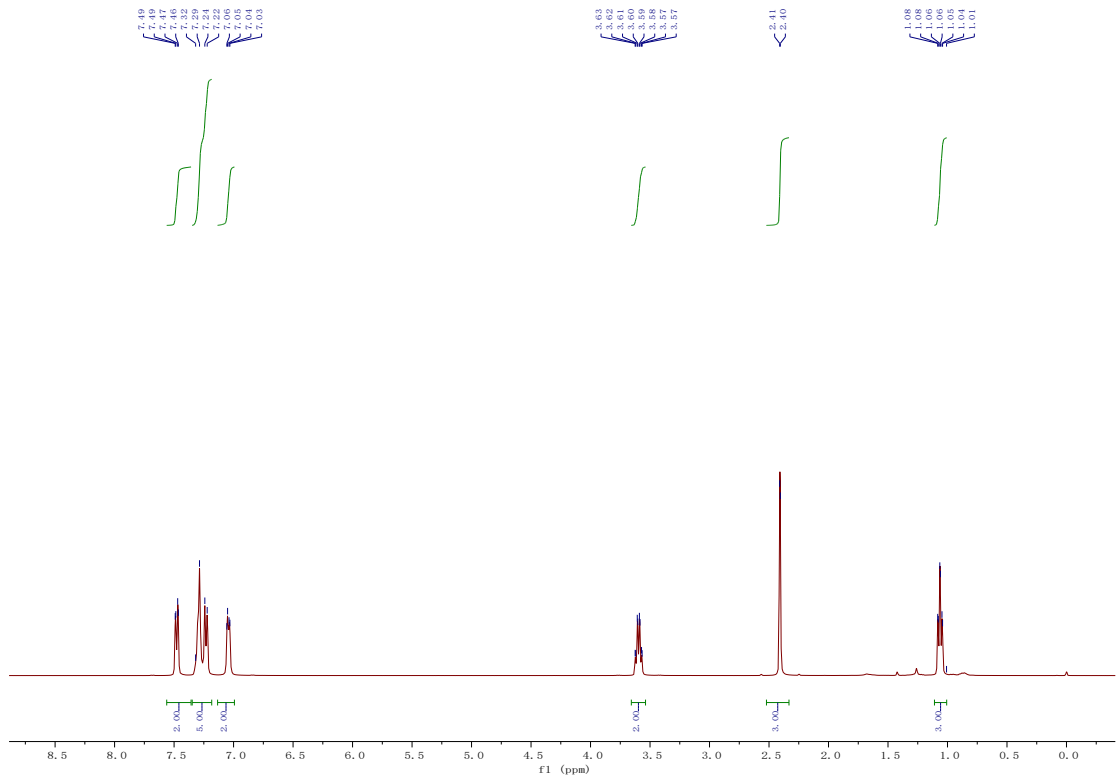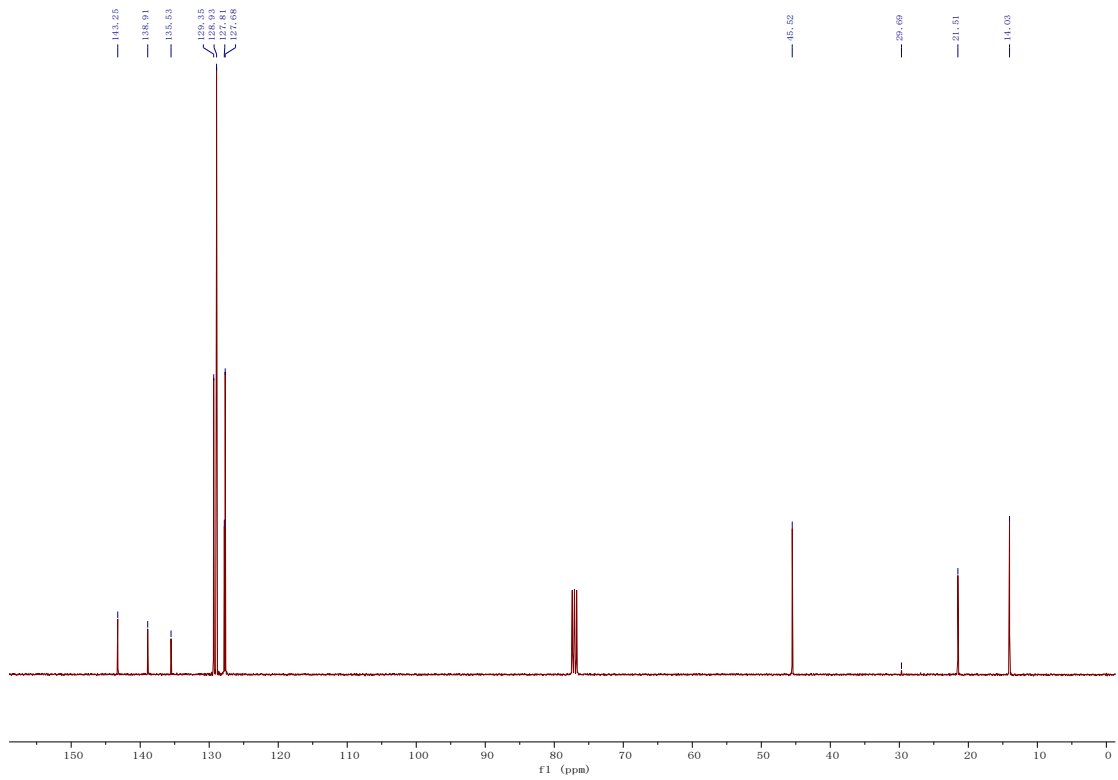

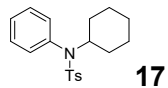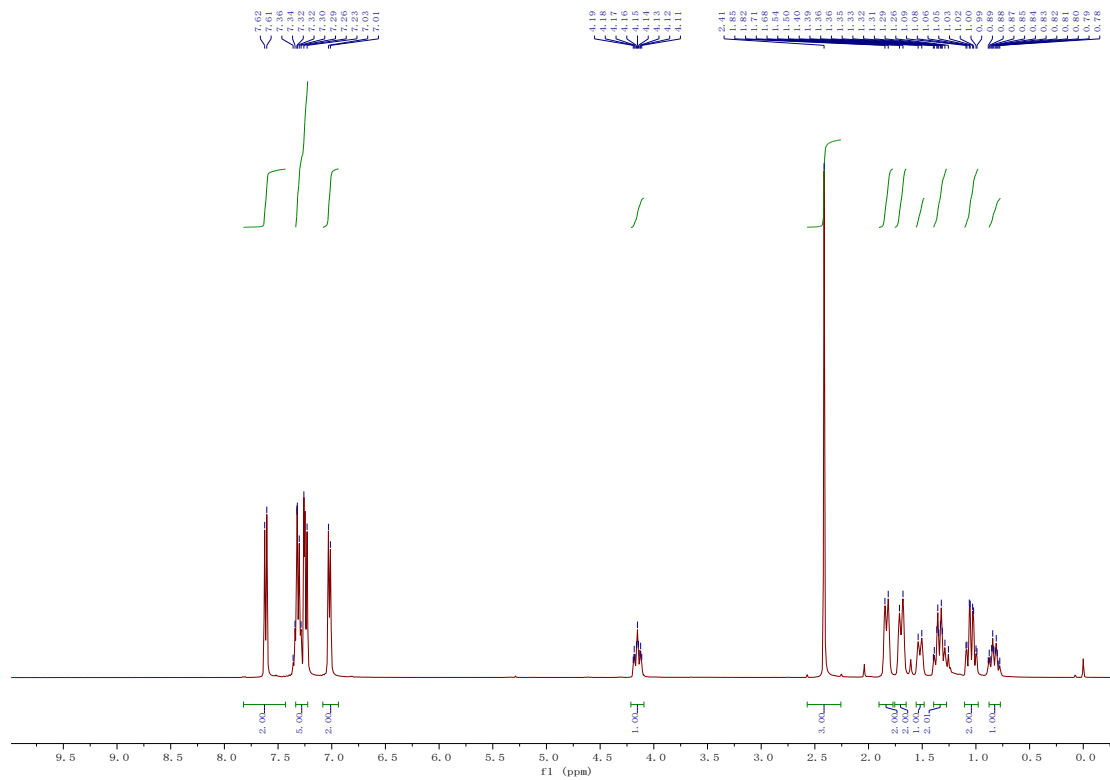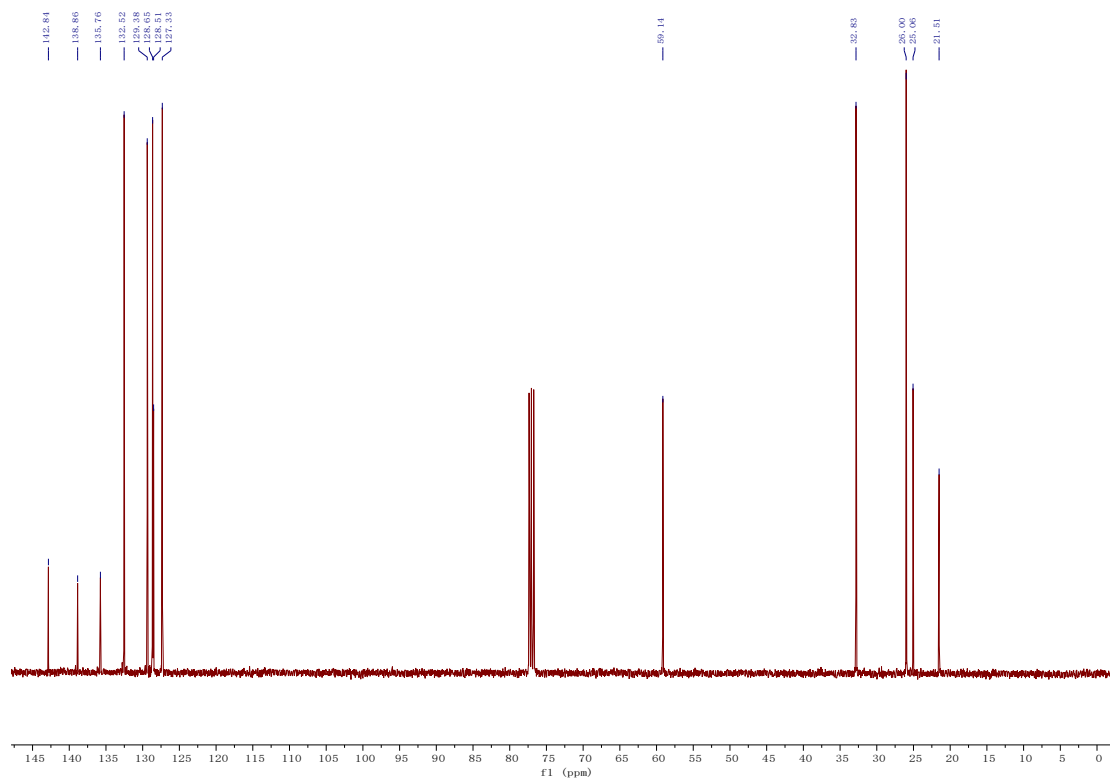

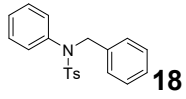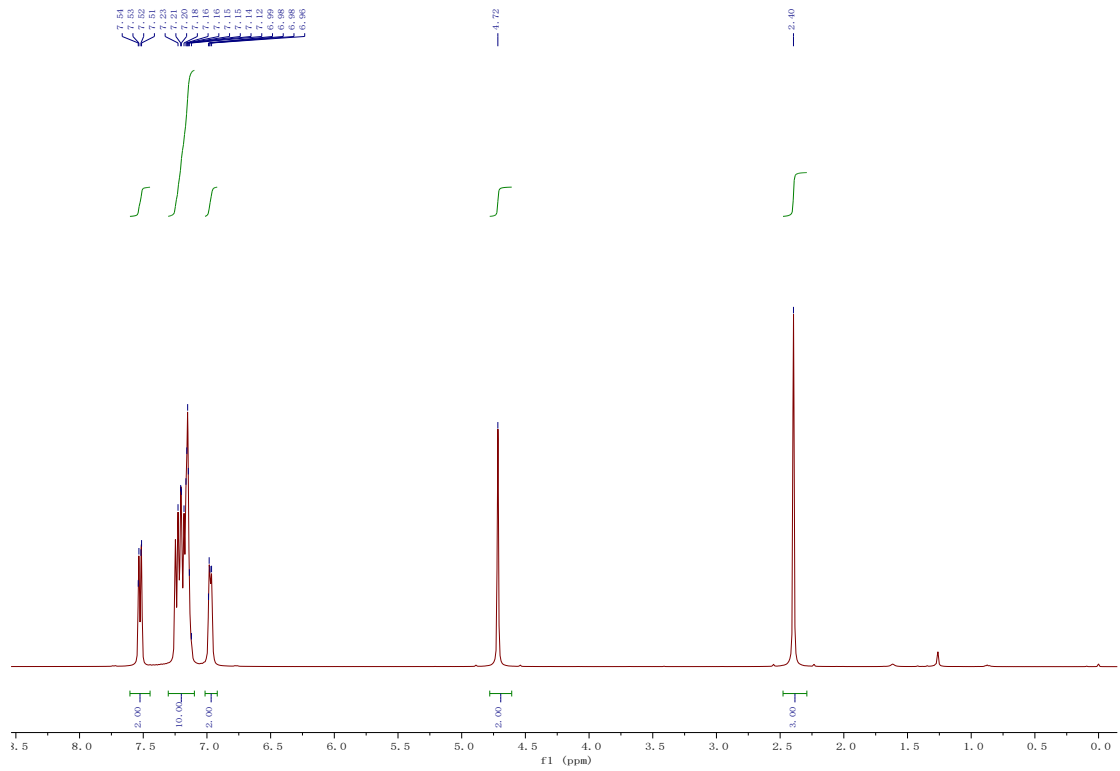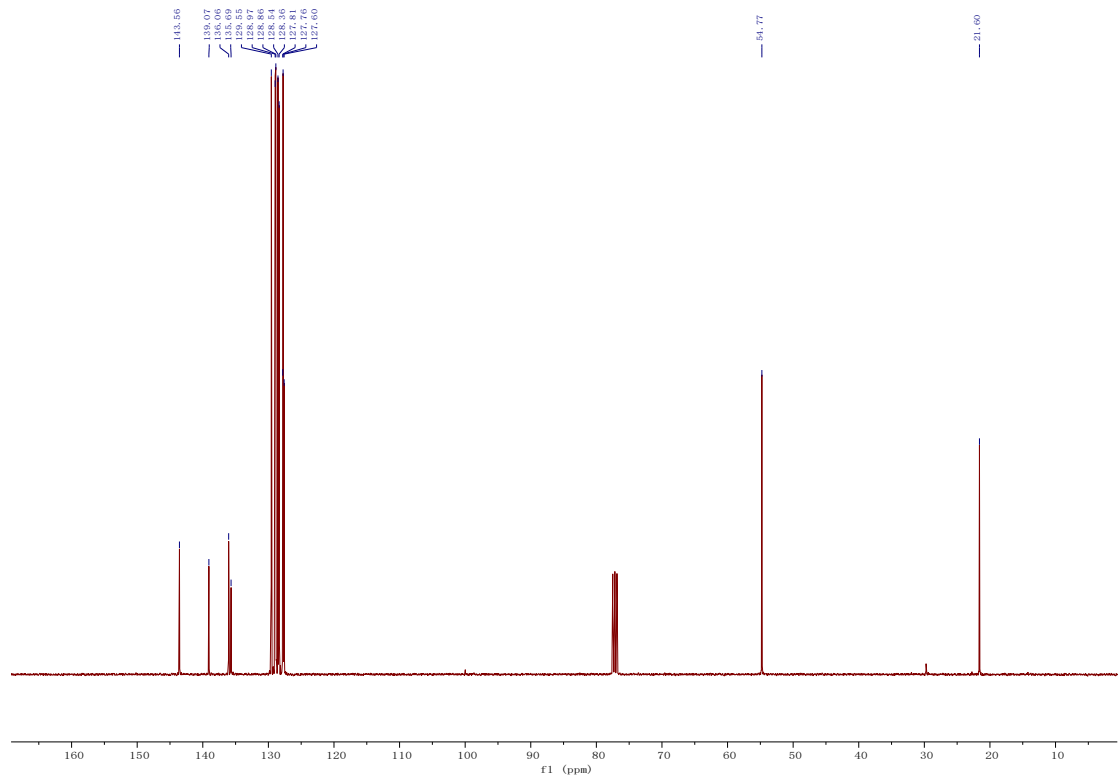

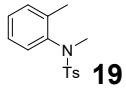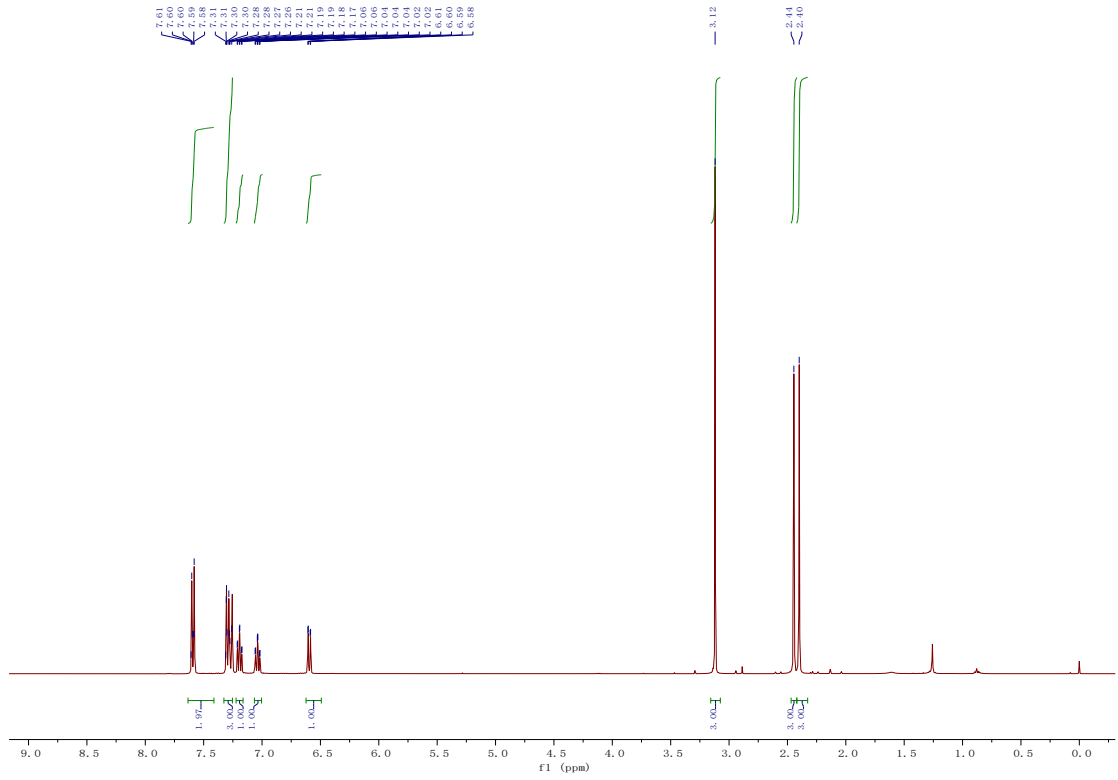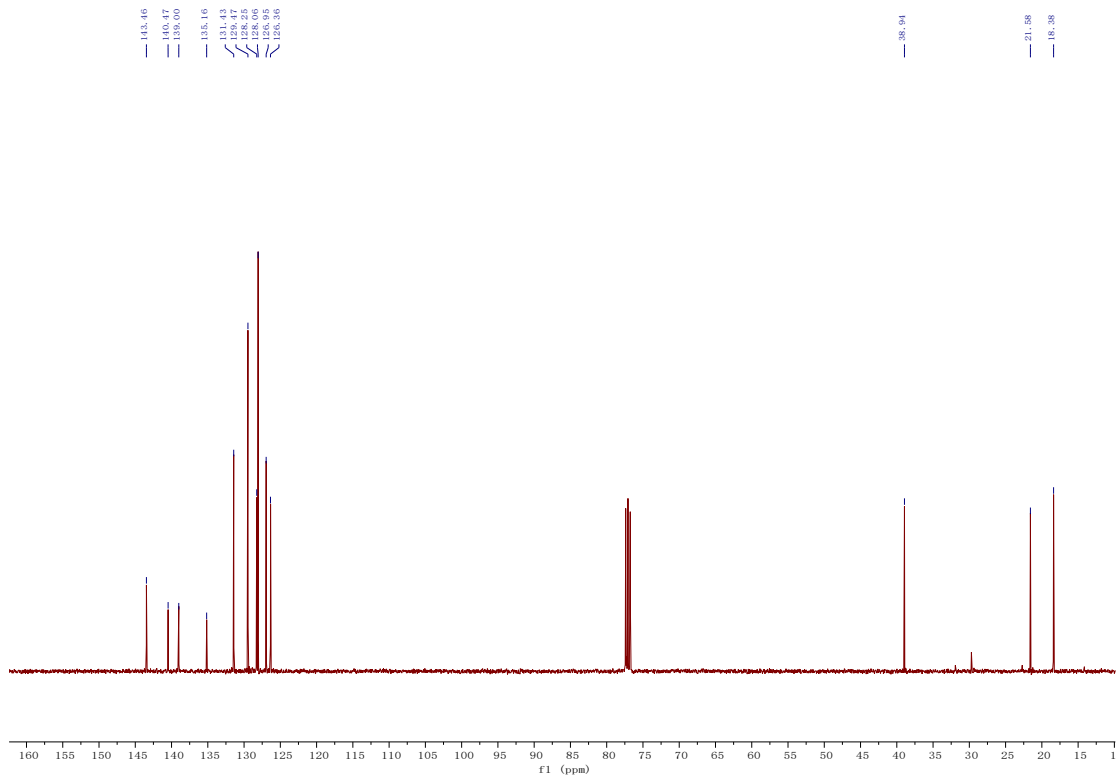

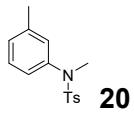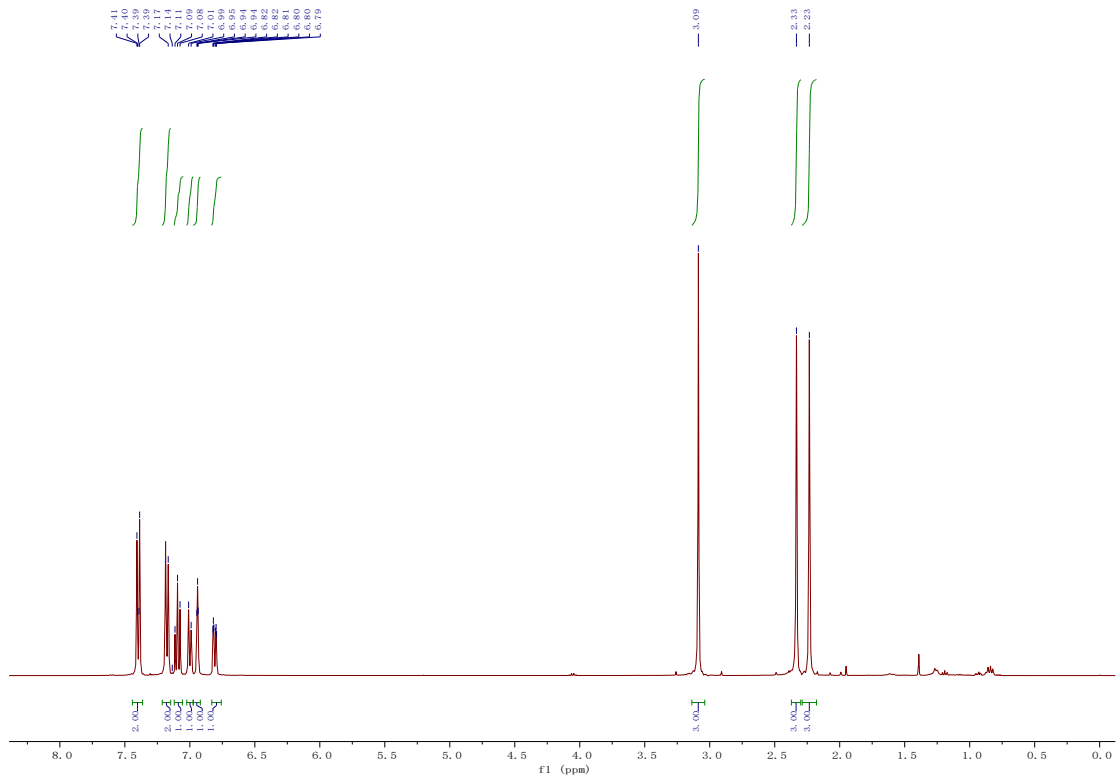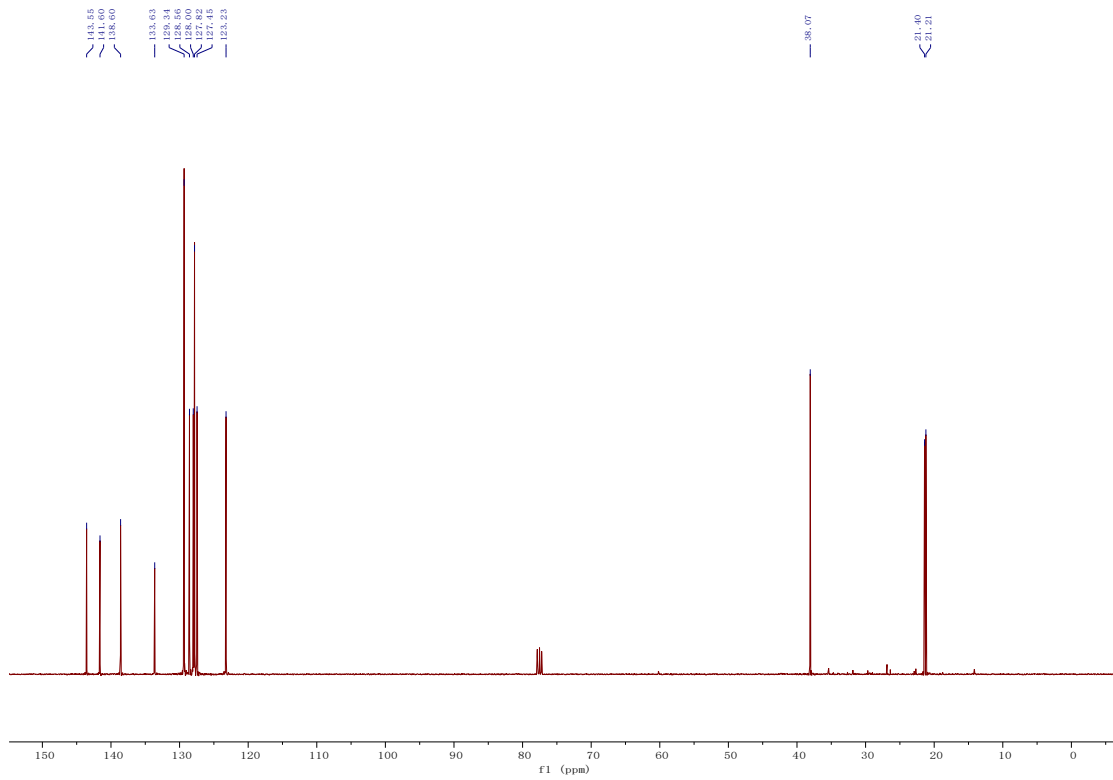

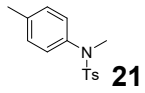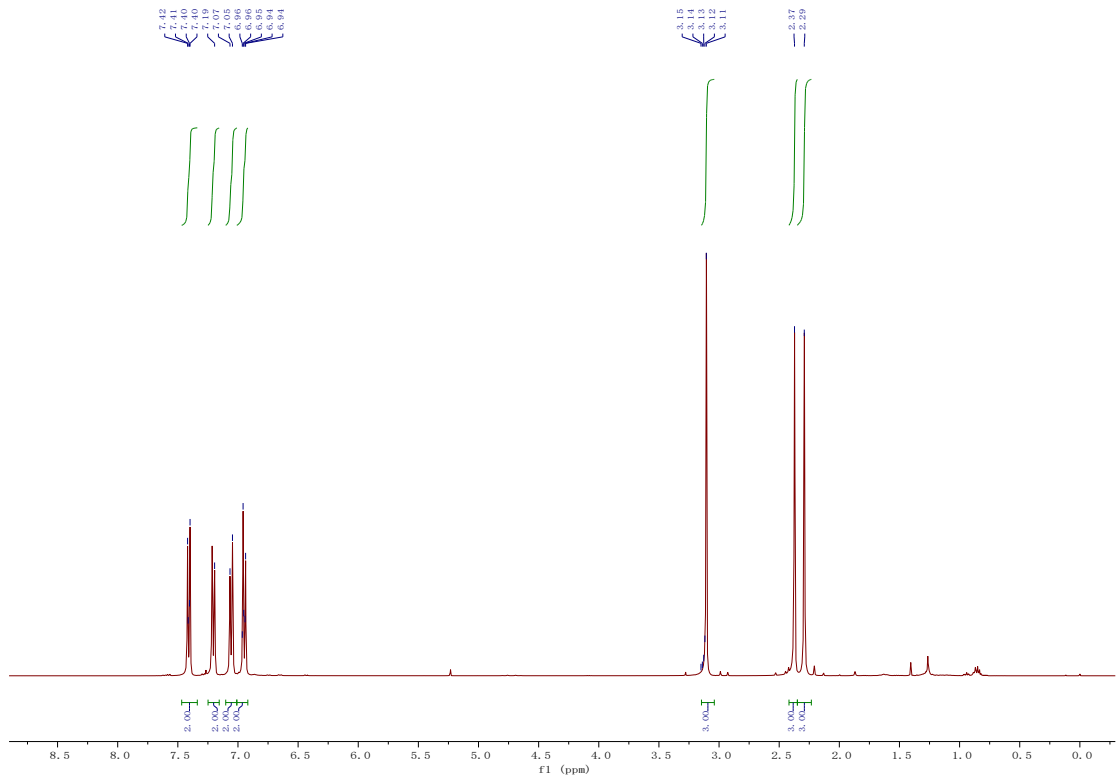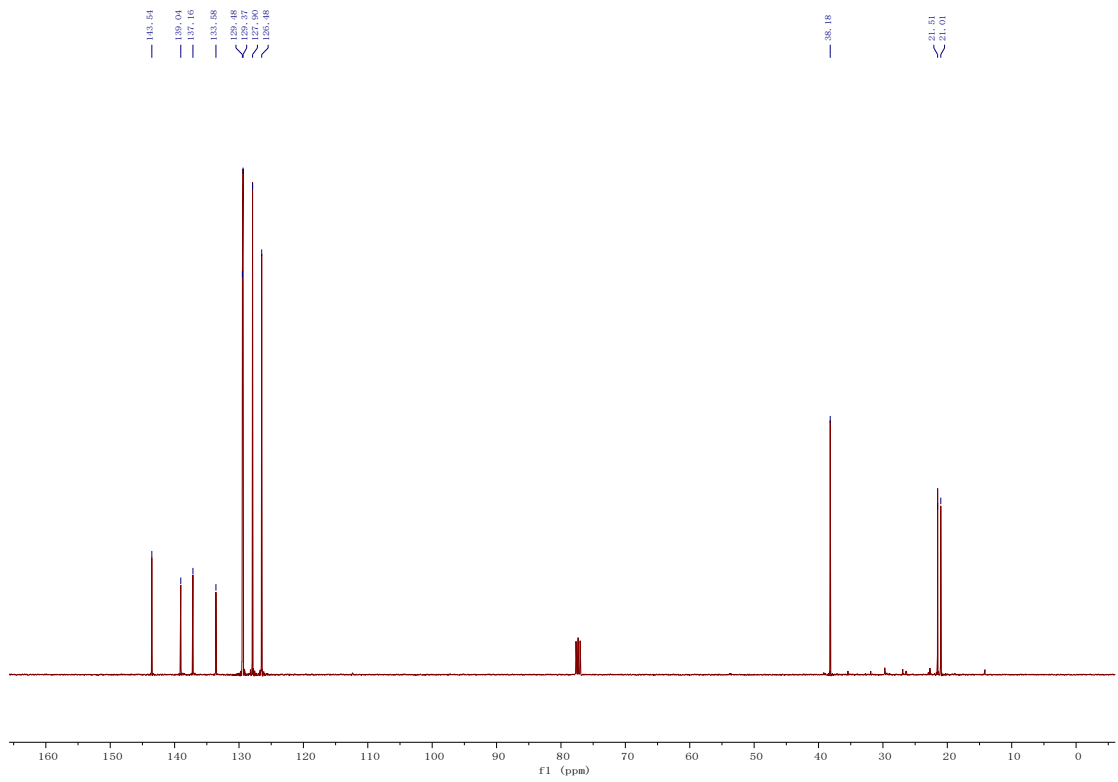



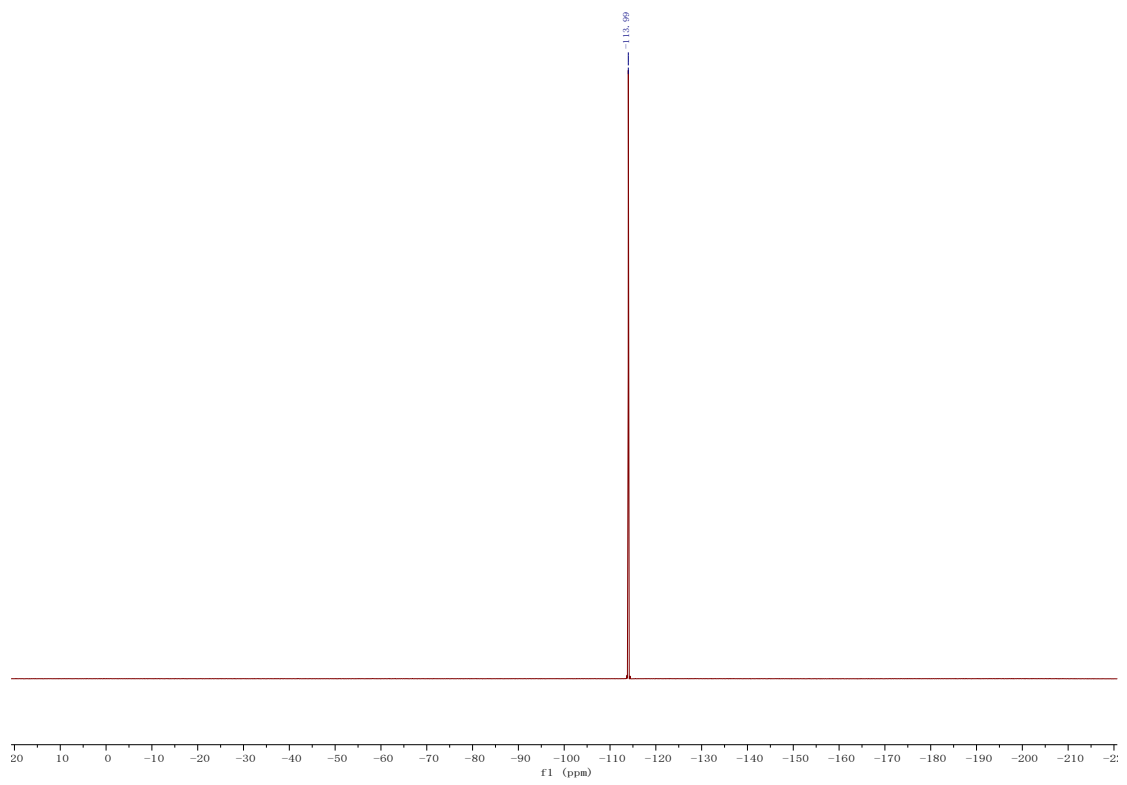



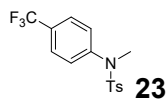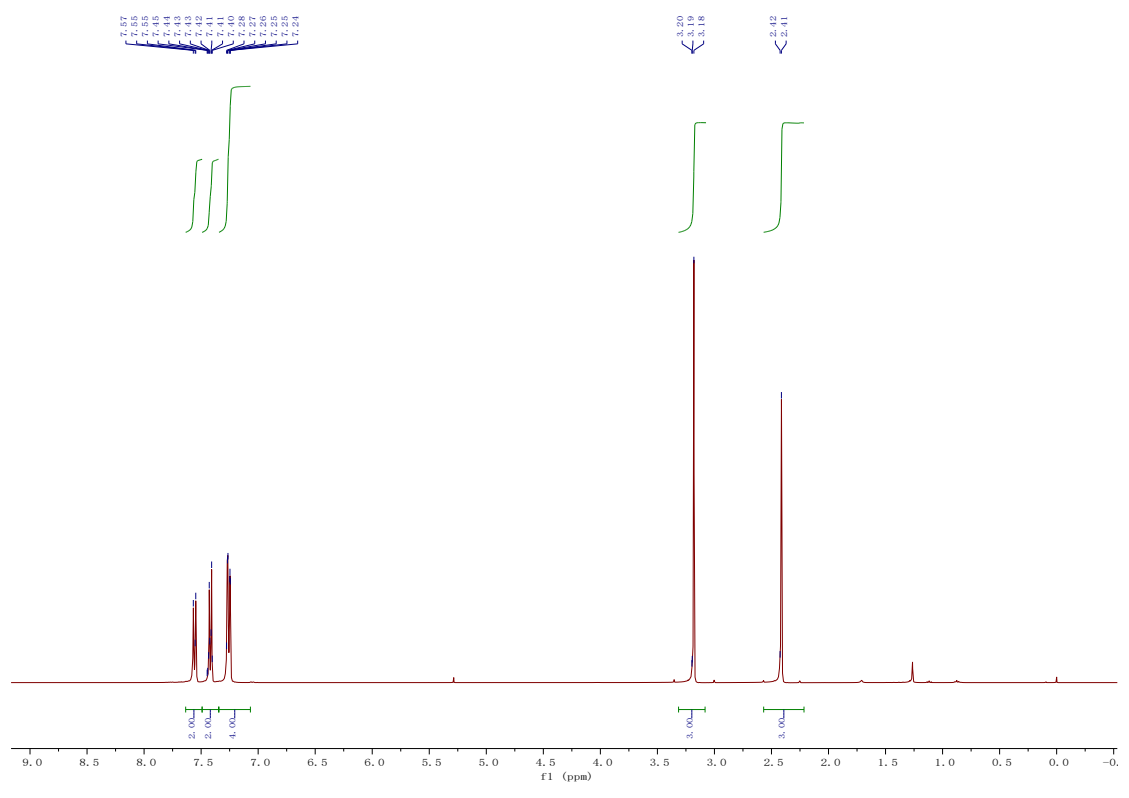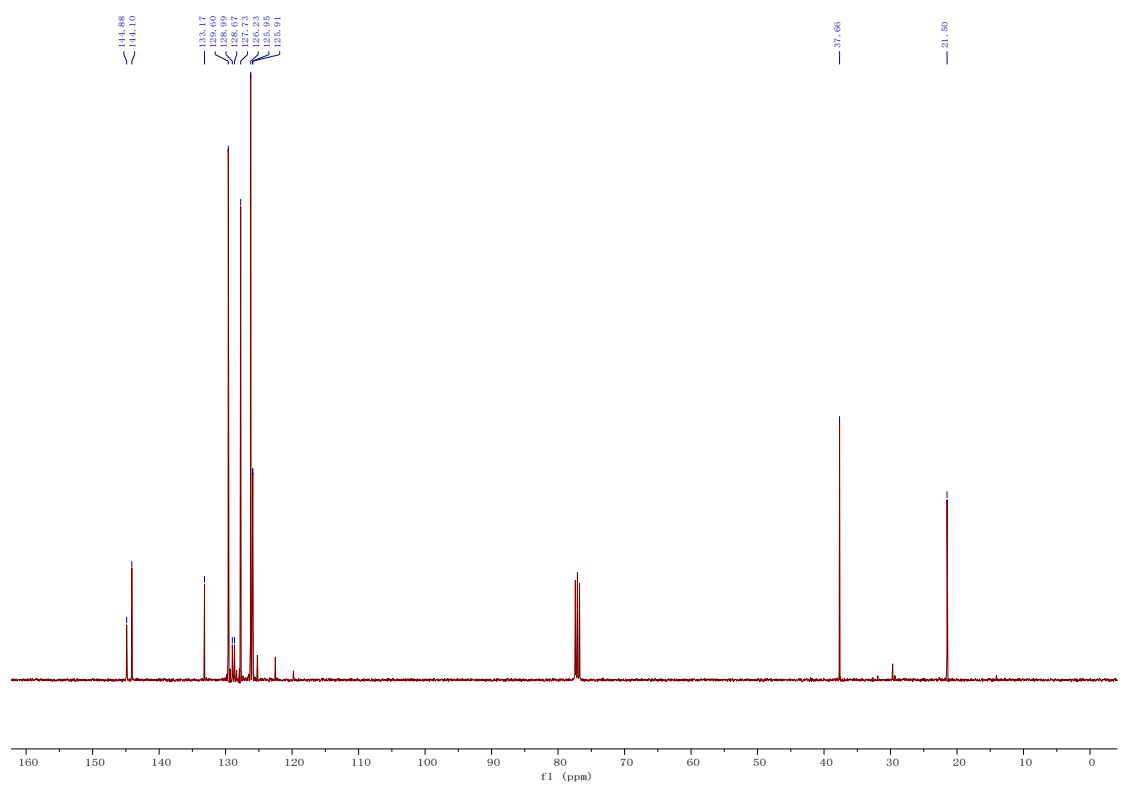

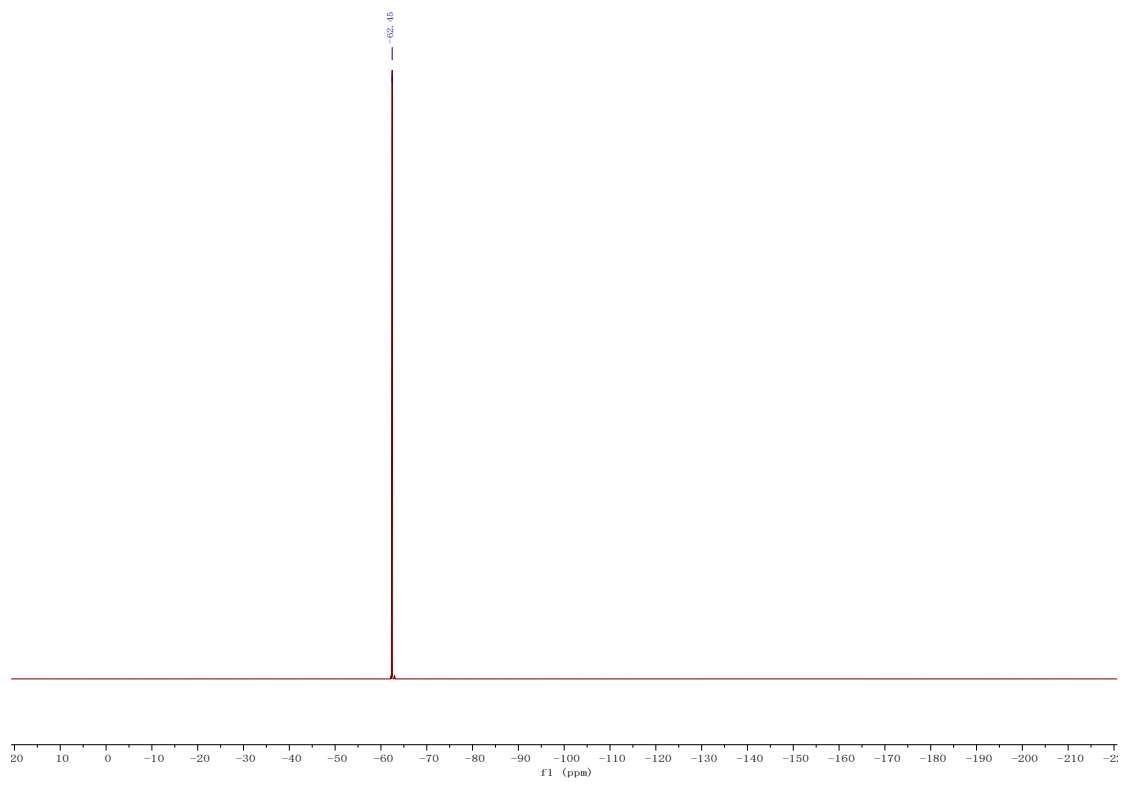

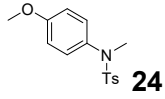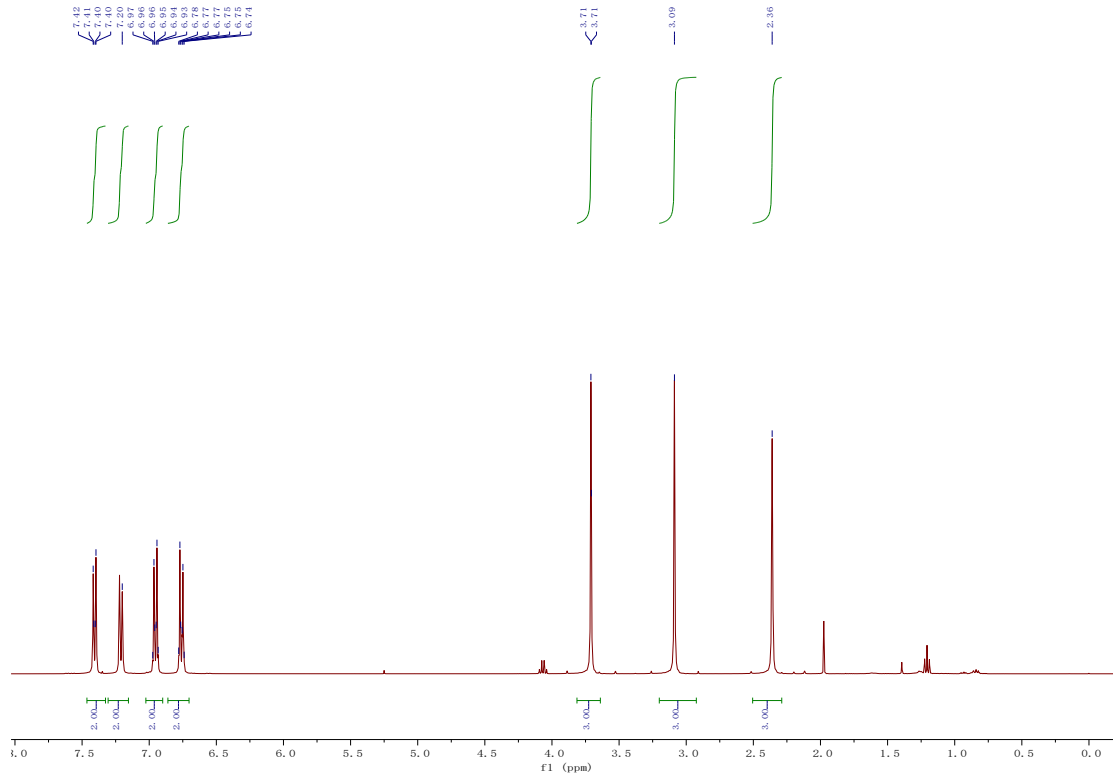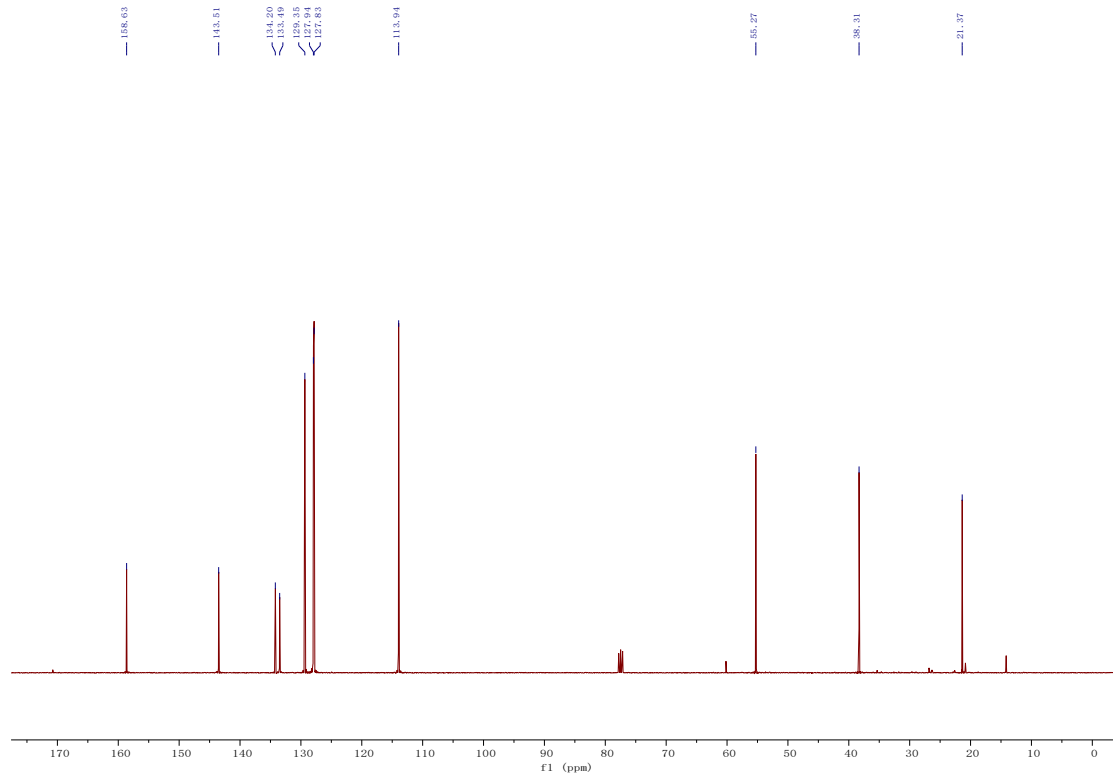



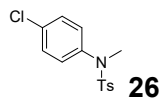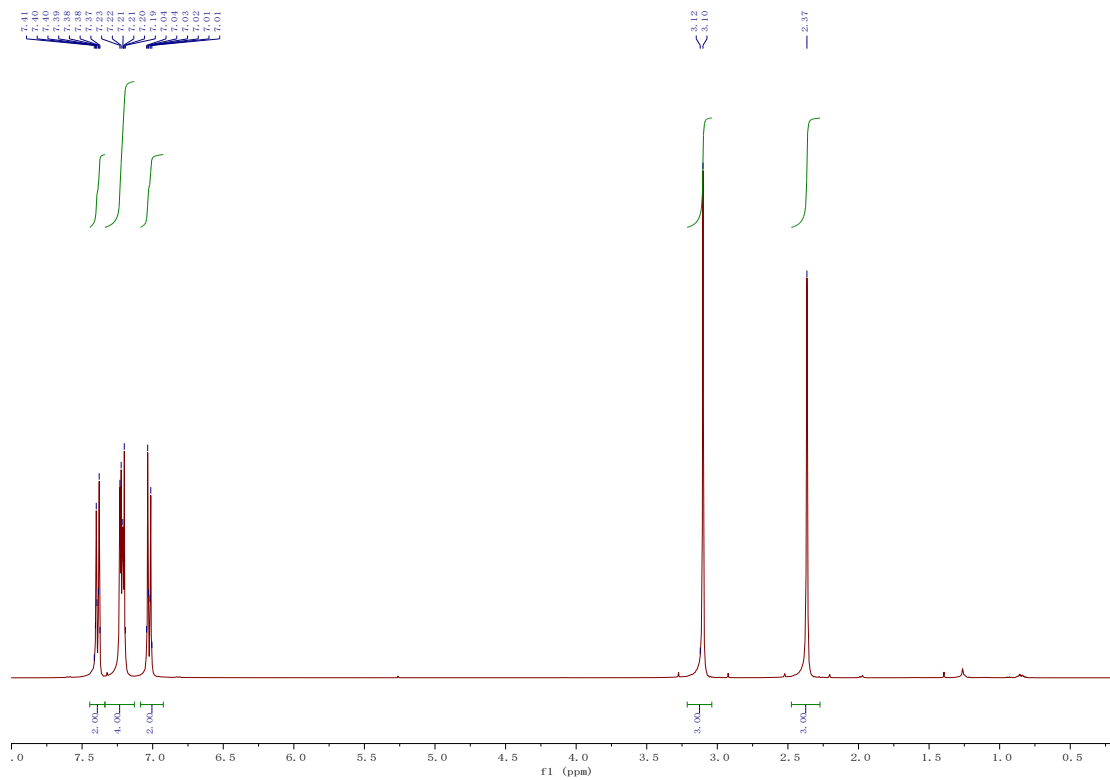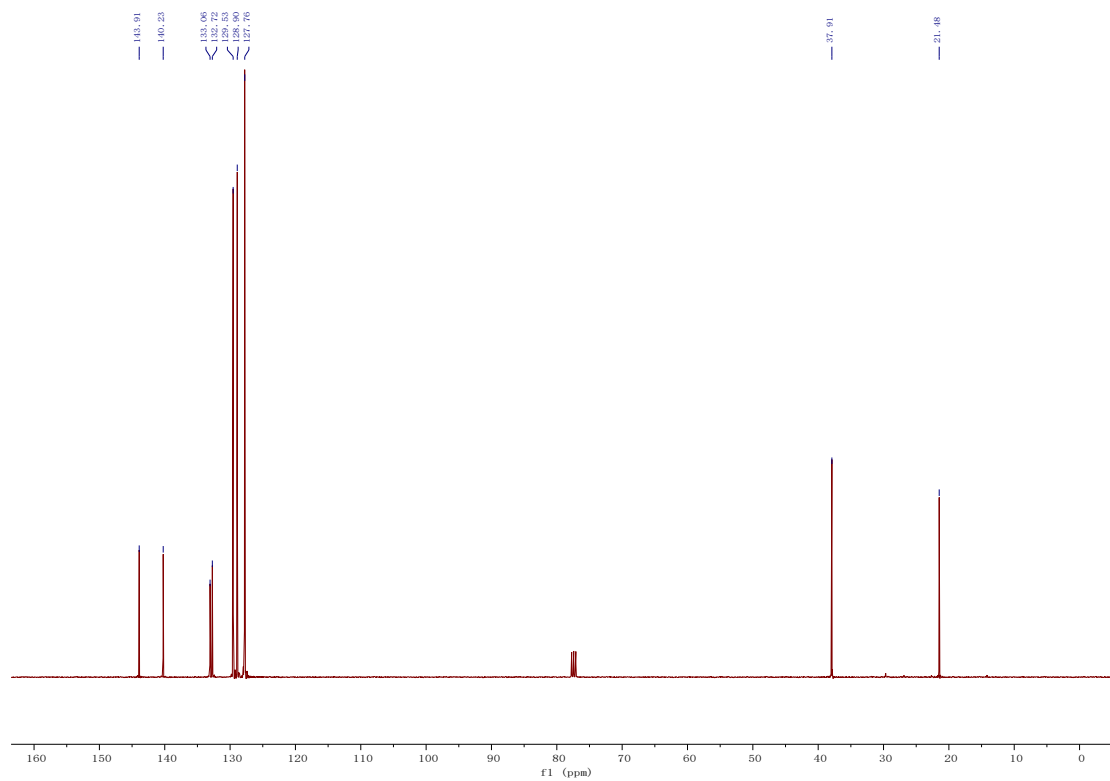

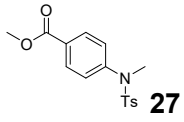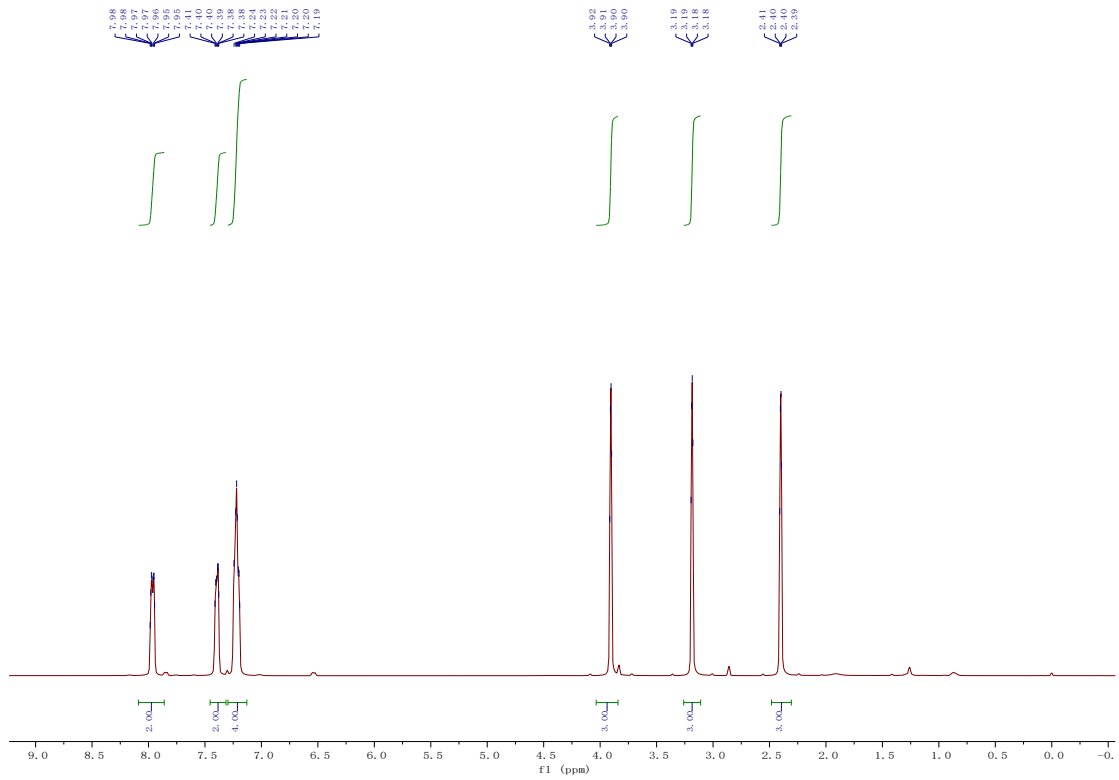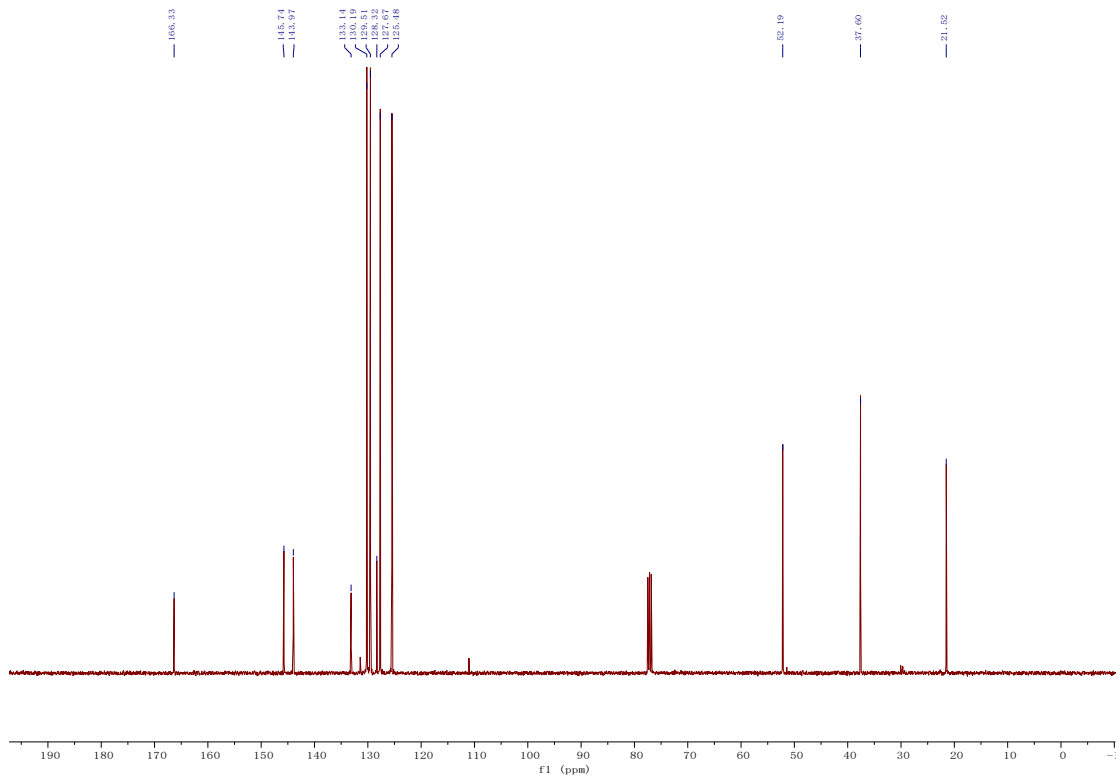

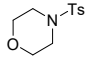

28

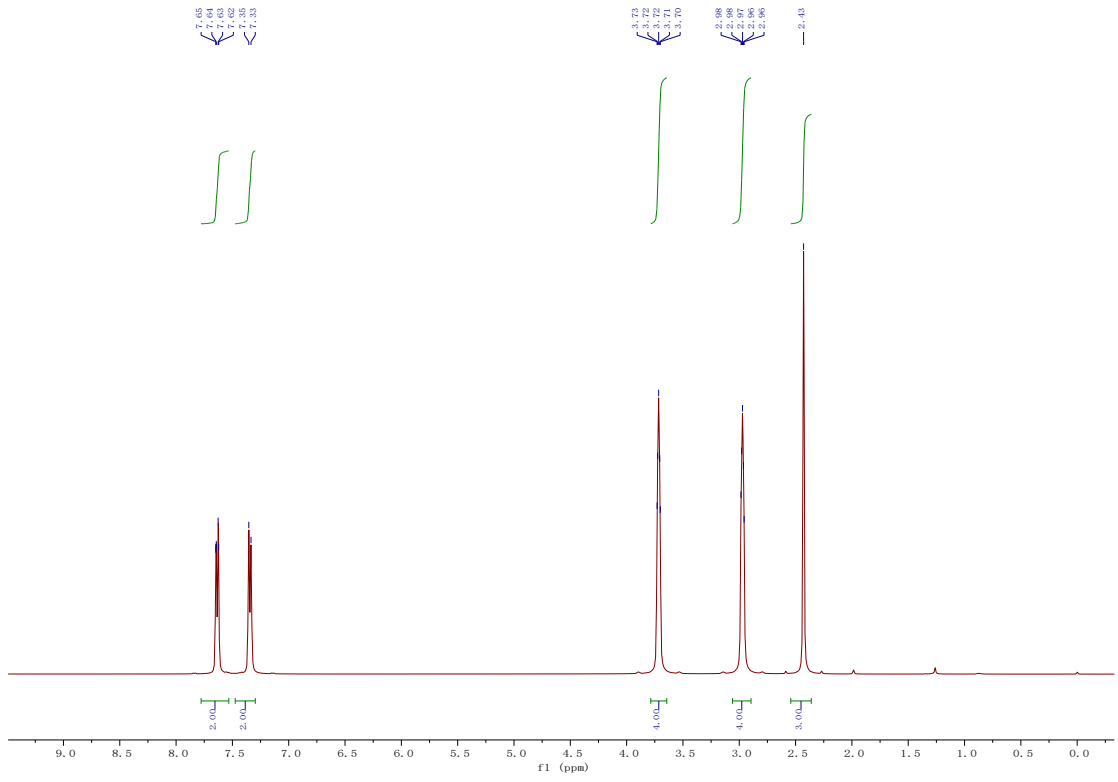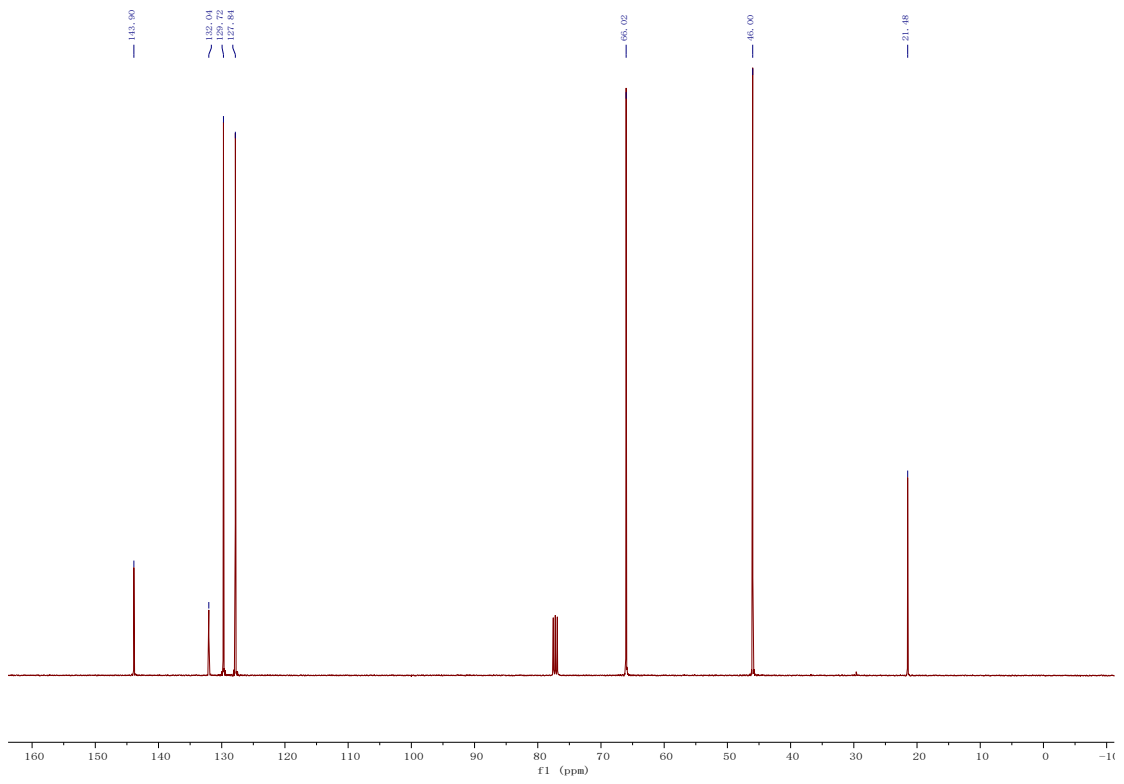

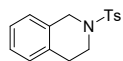

29

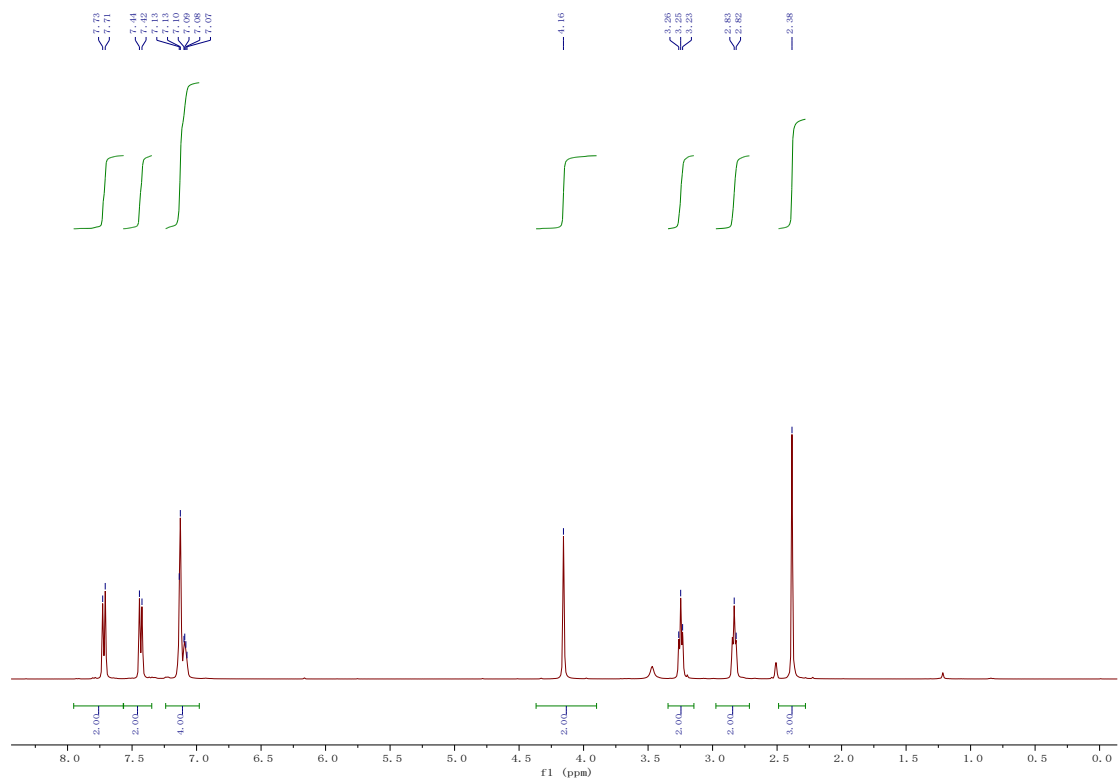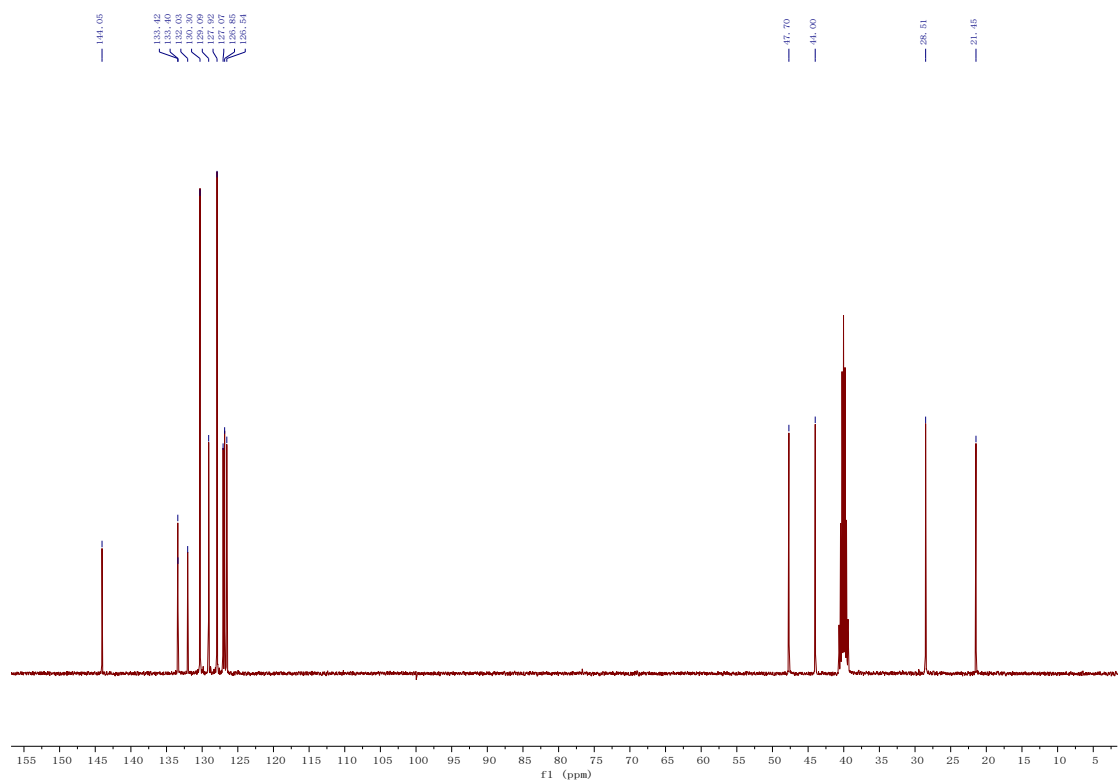



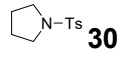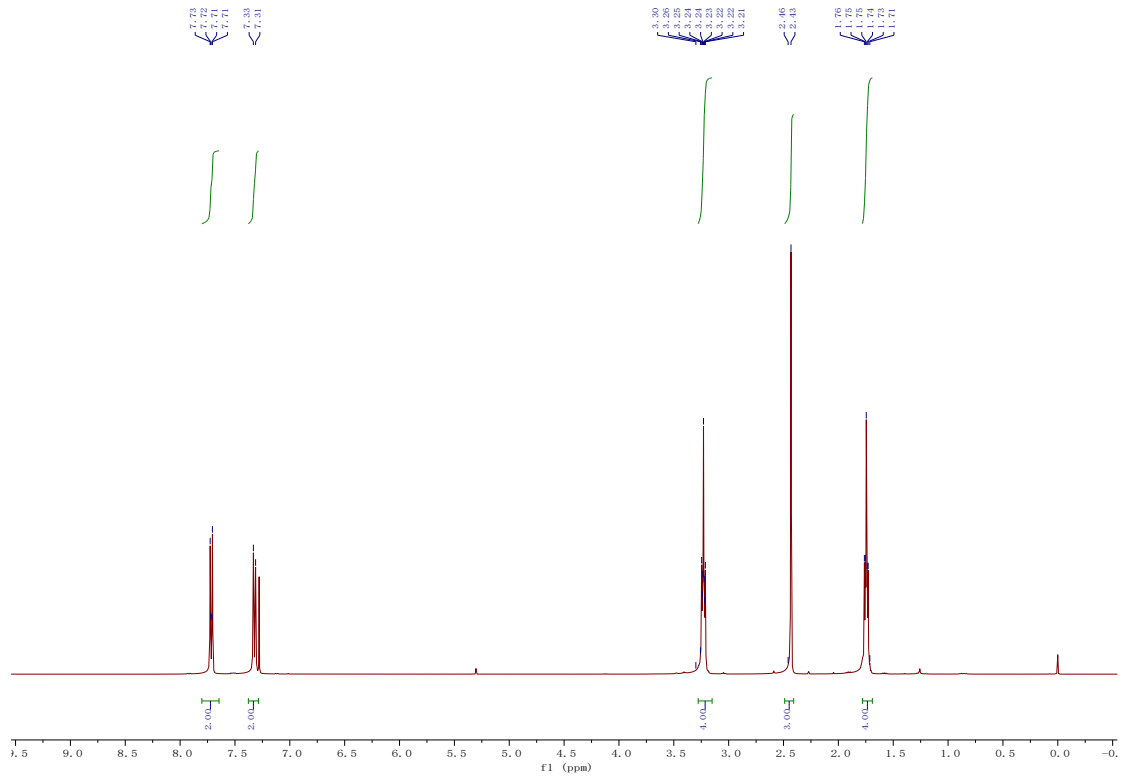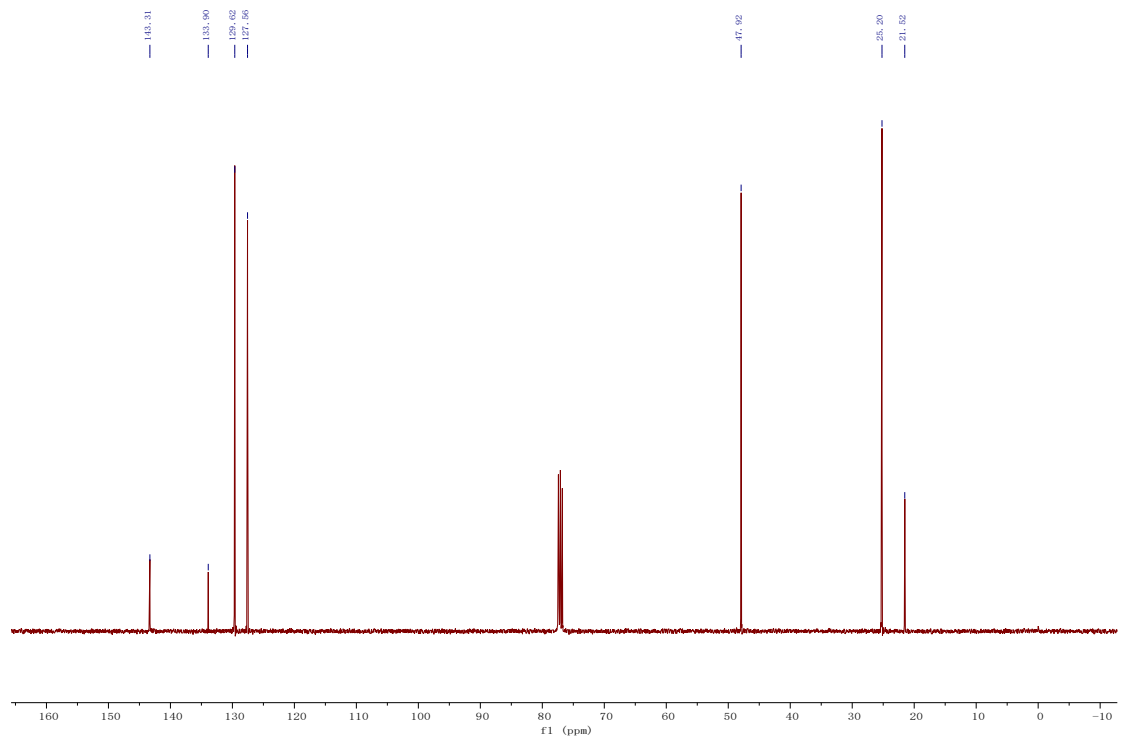

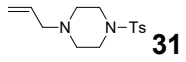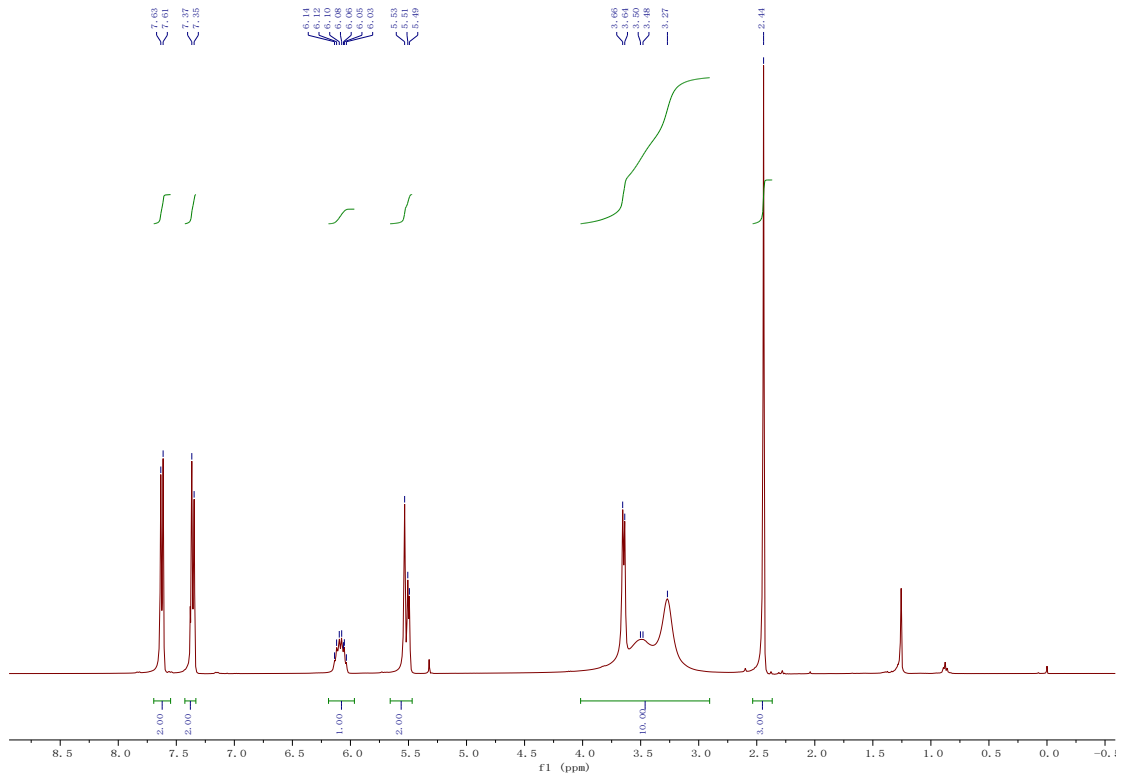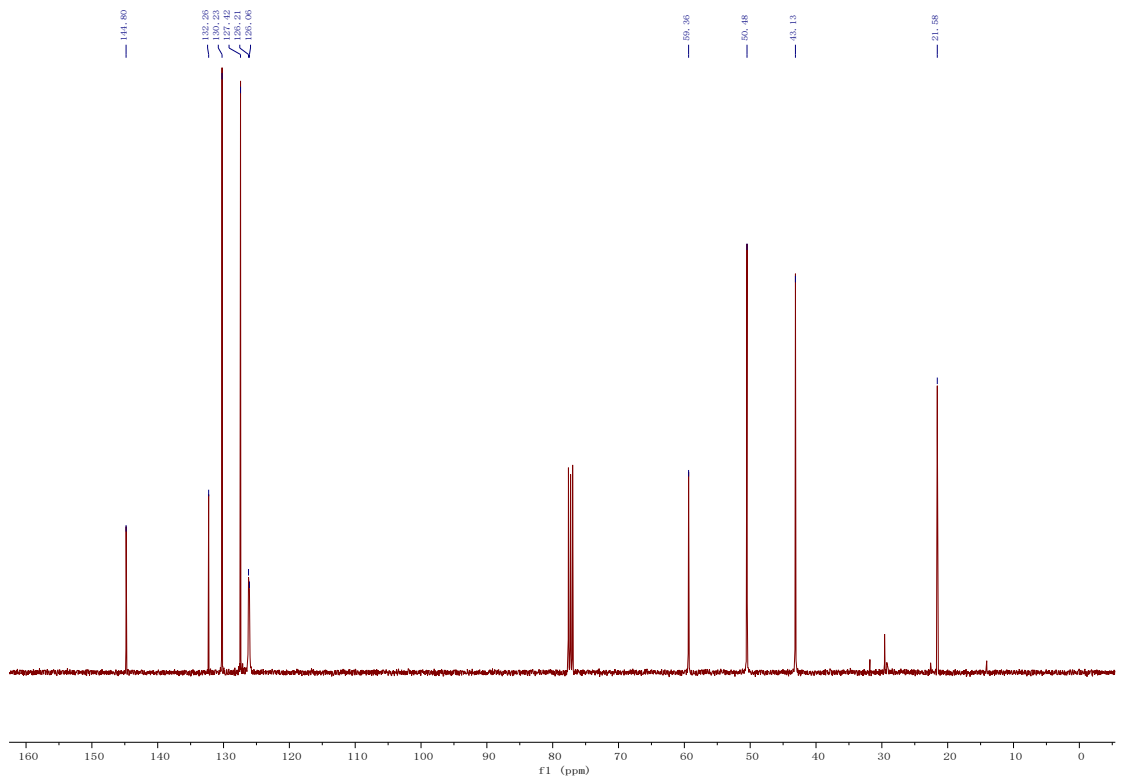

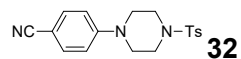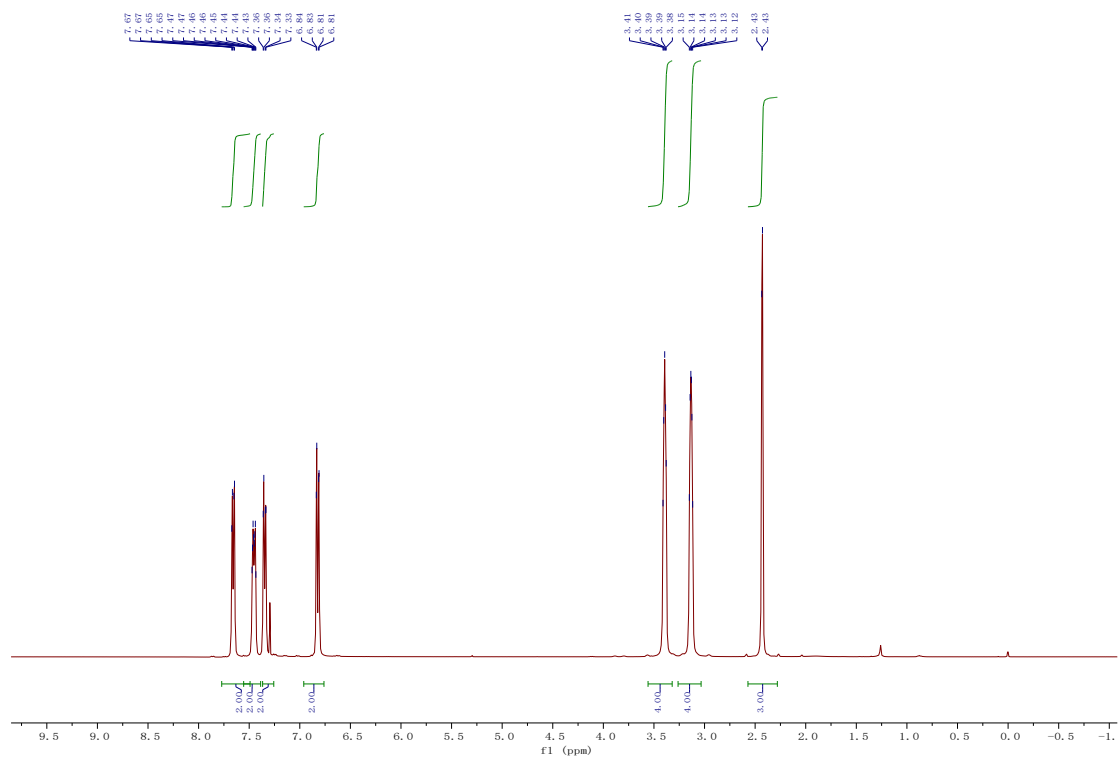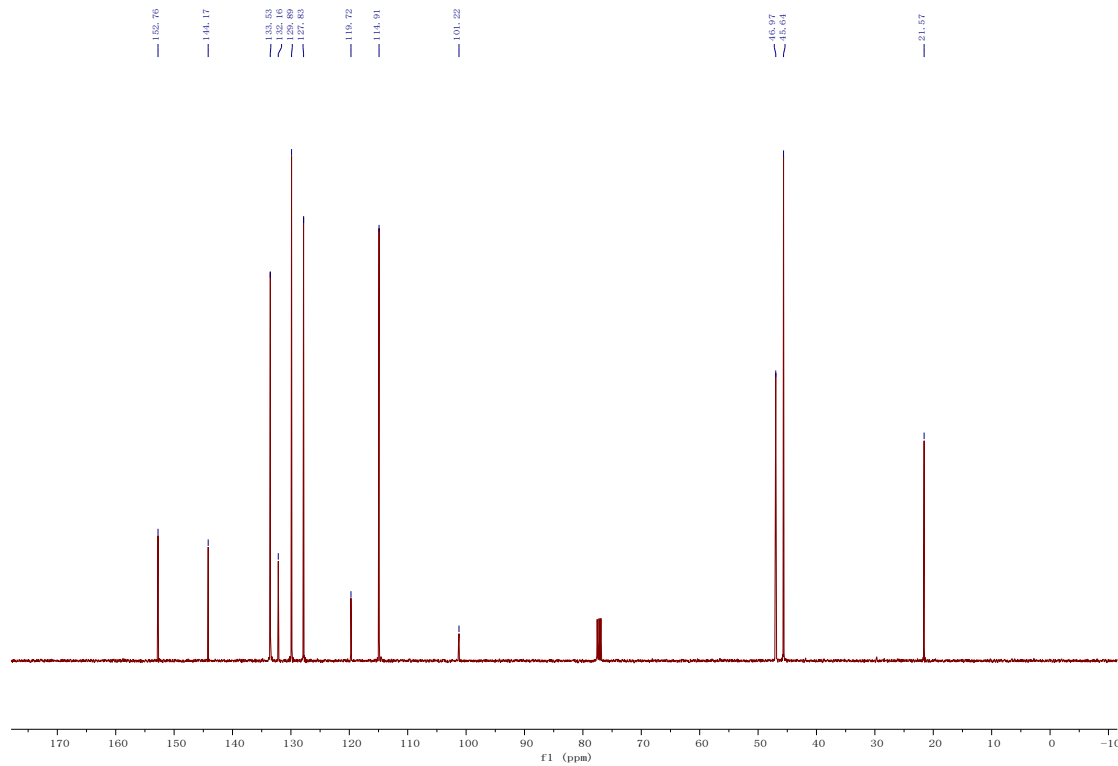

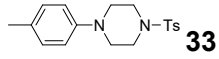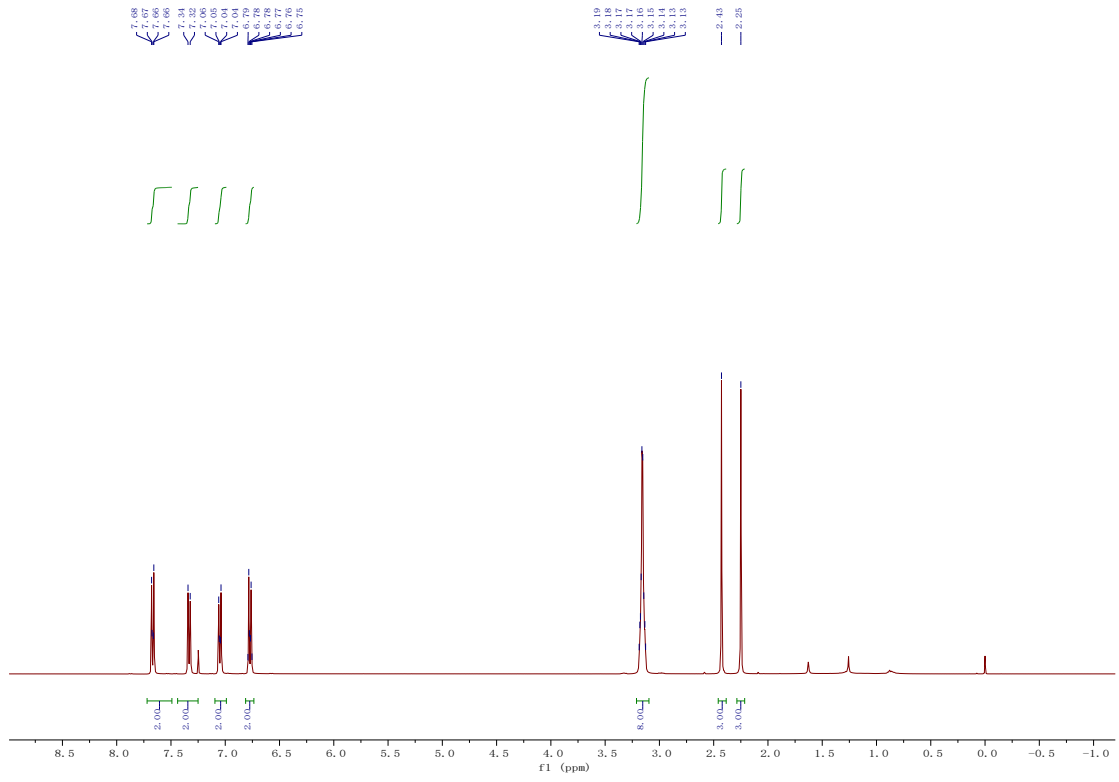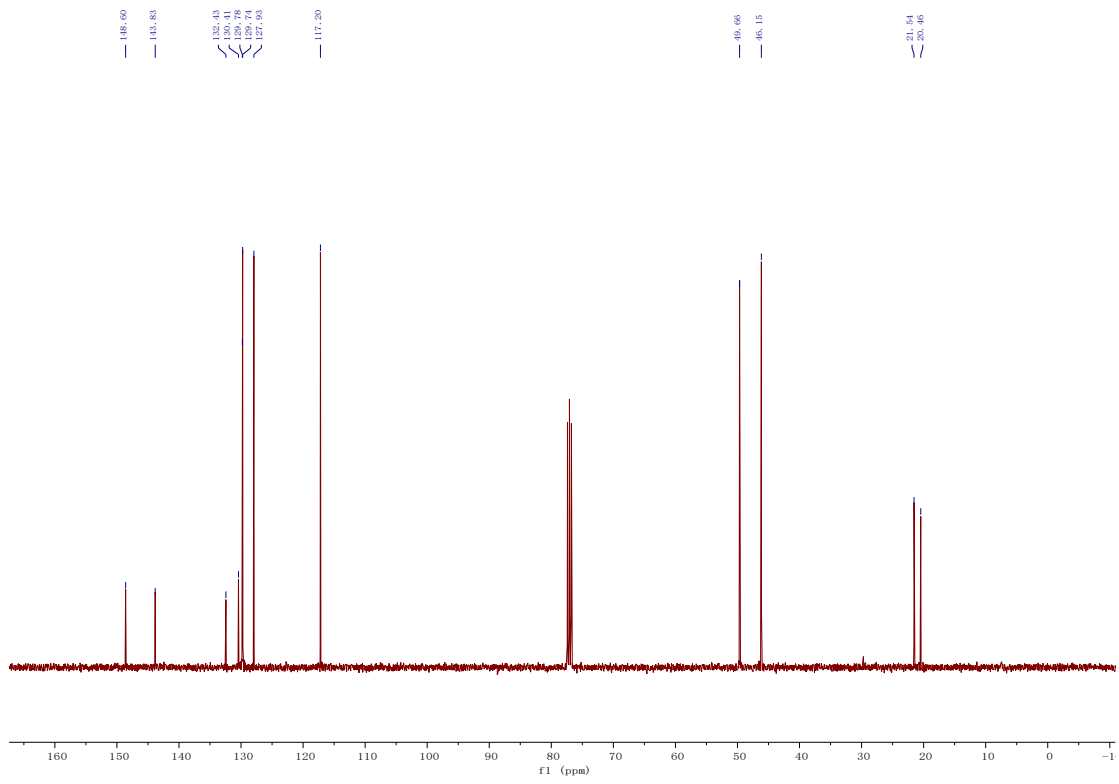

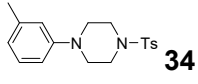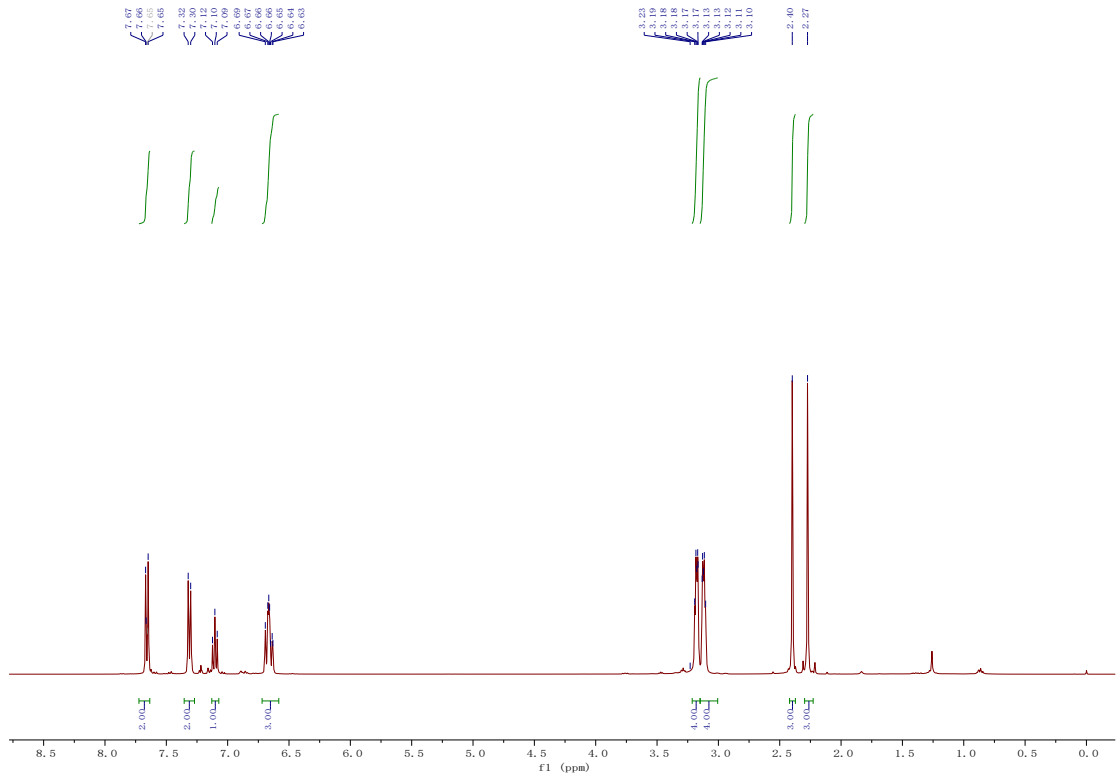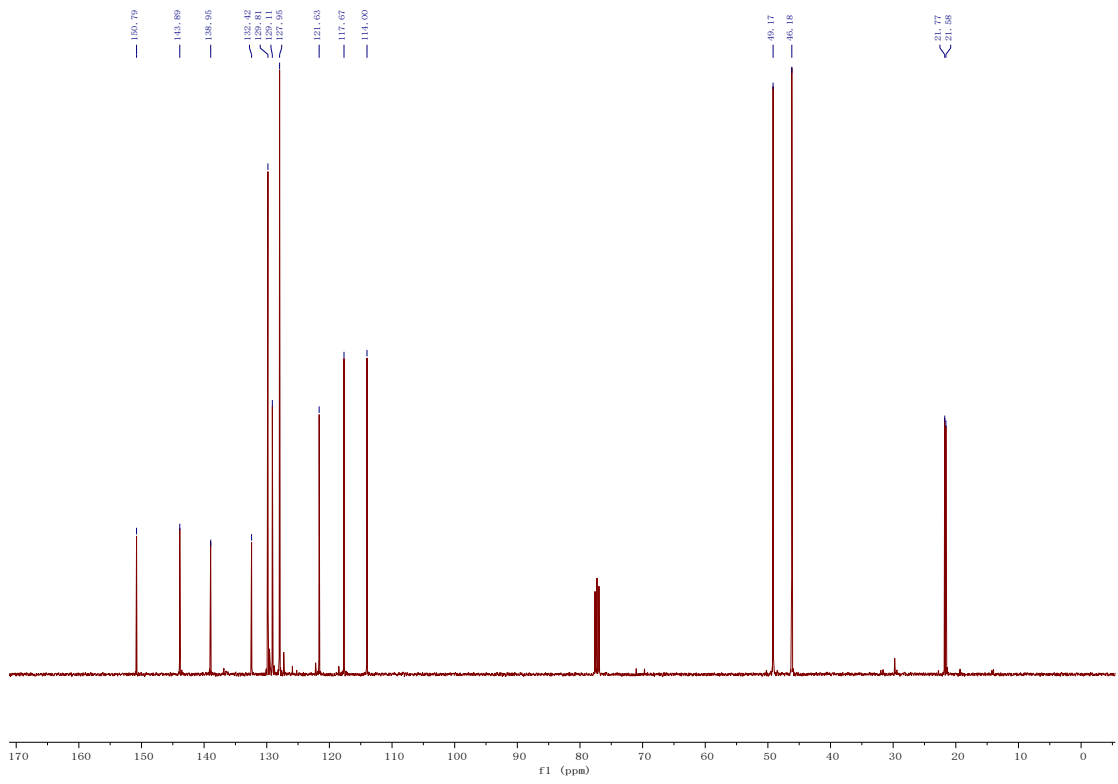

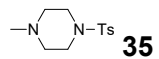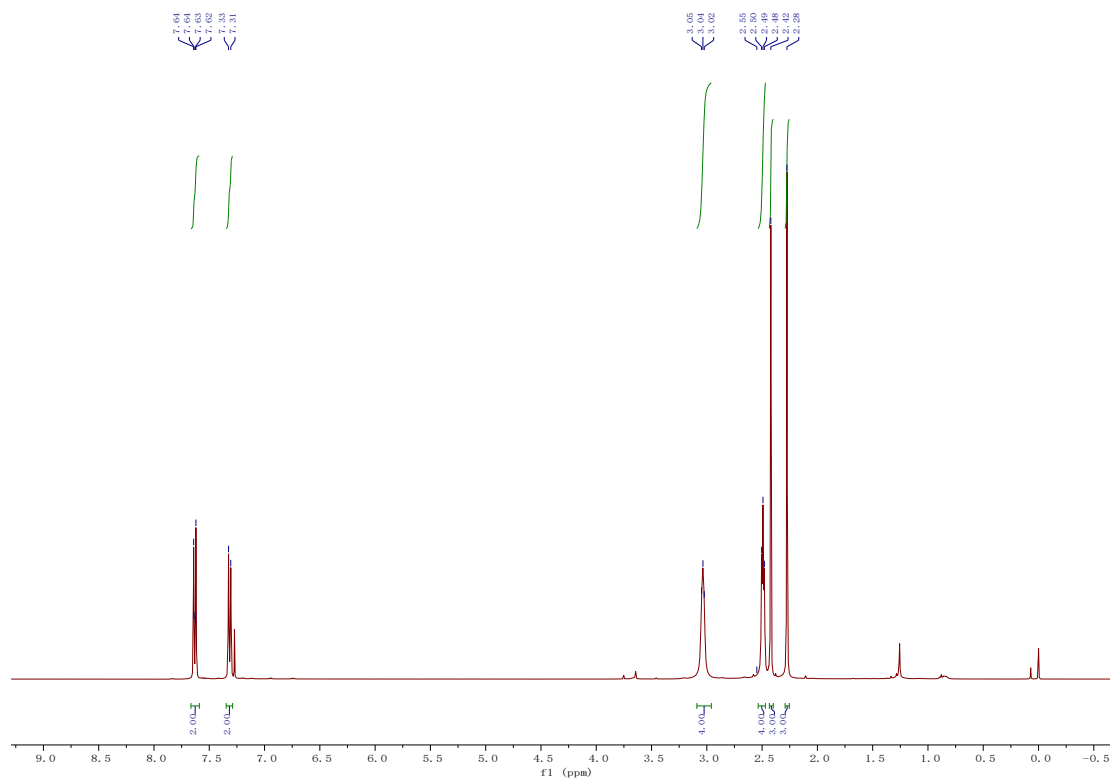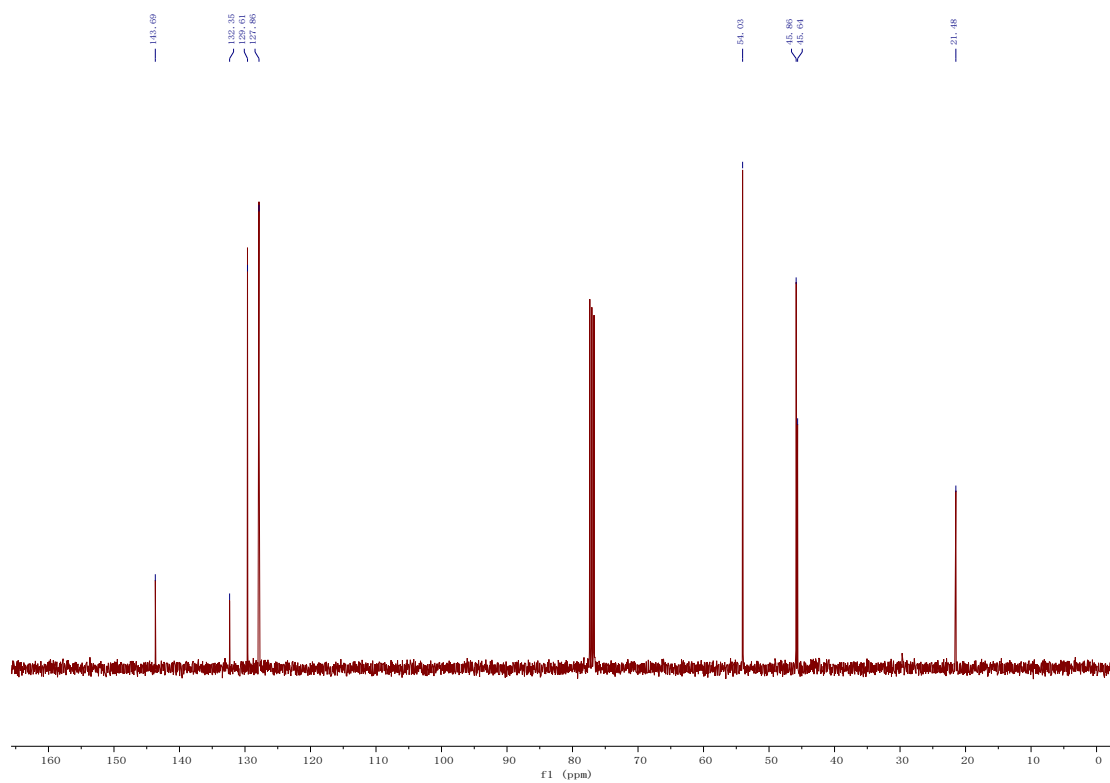

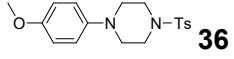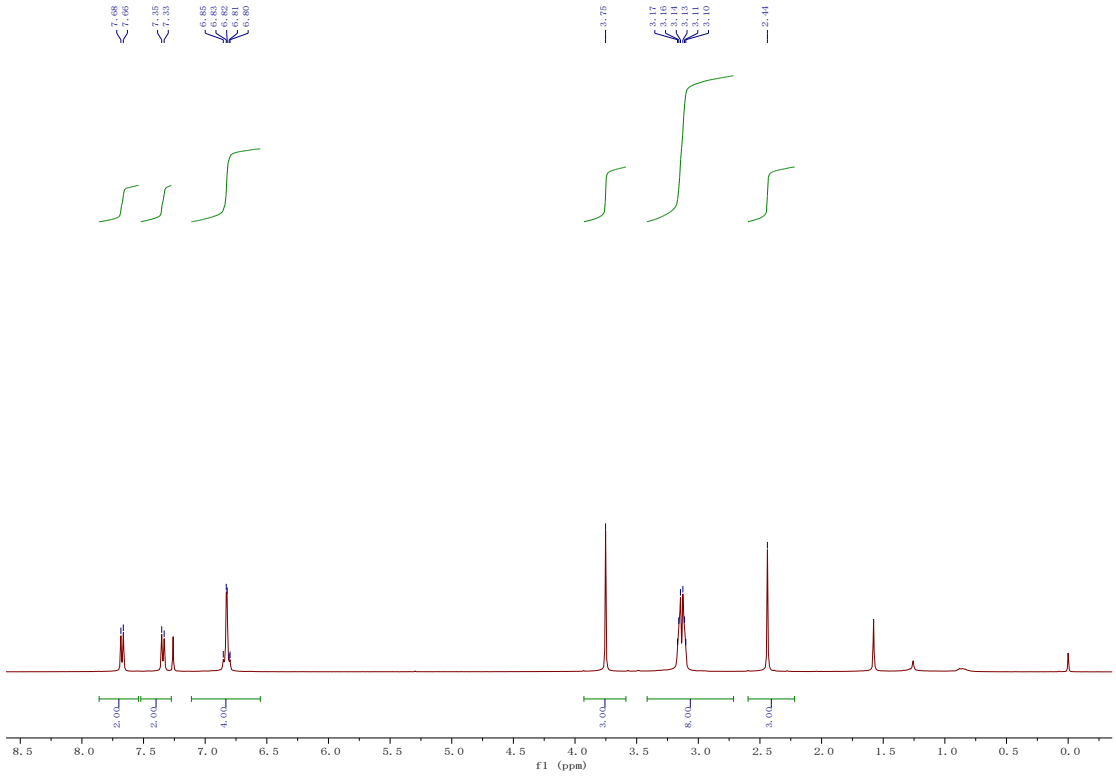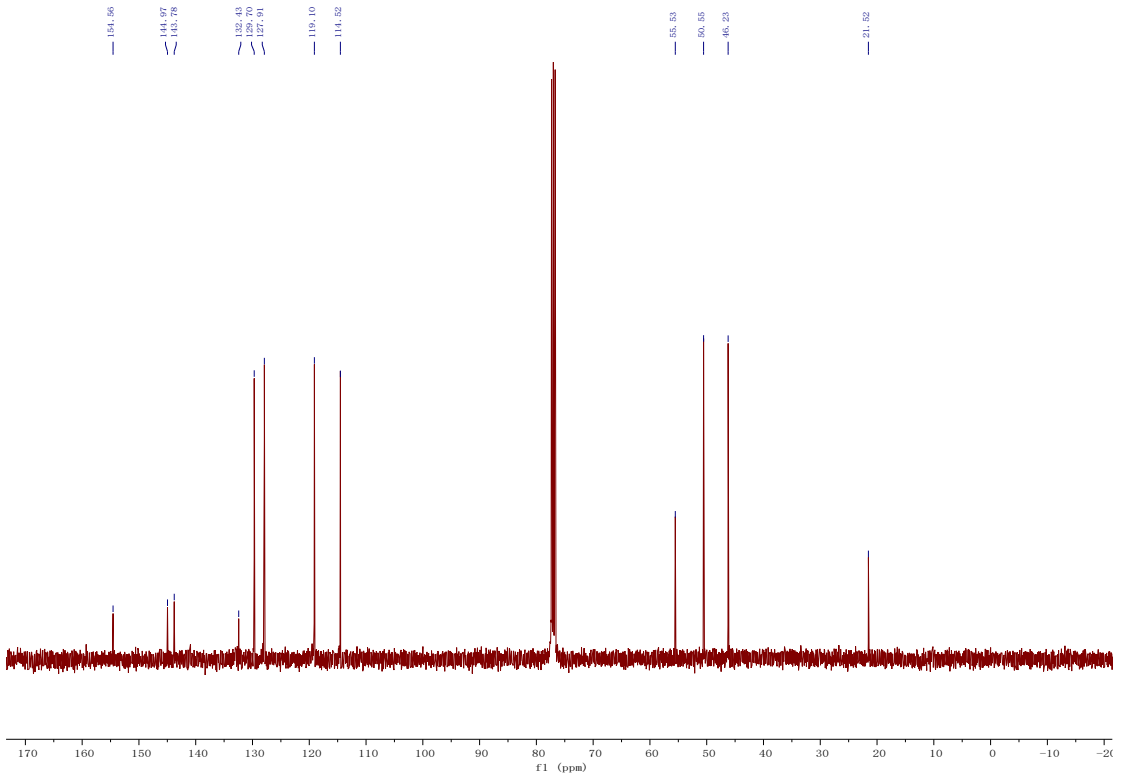

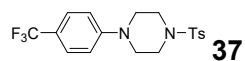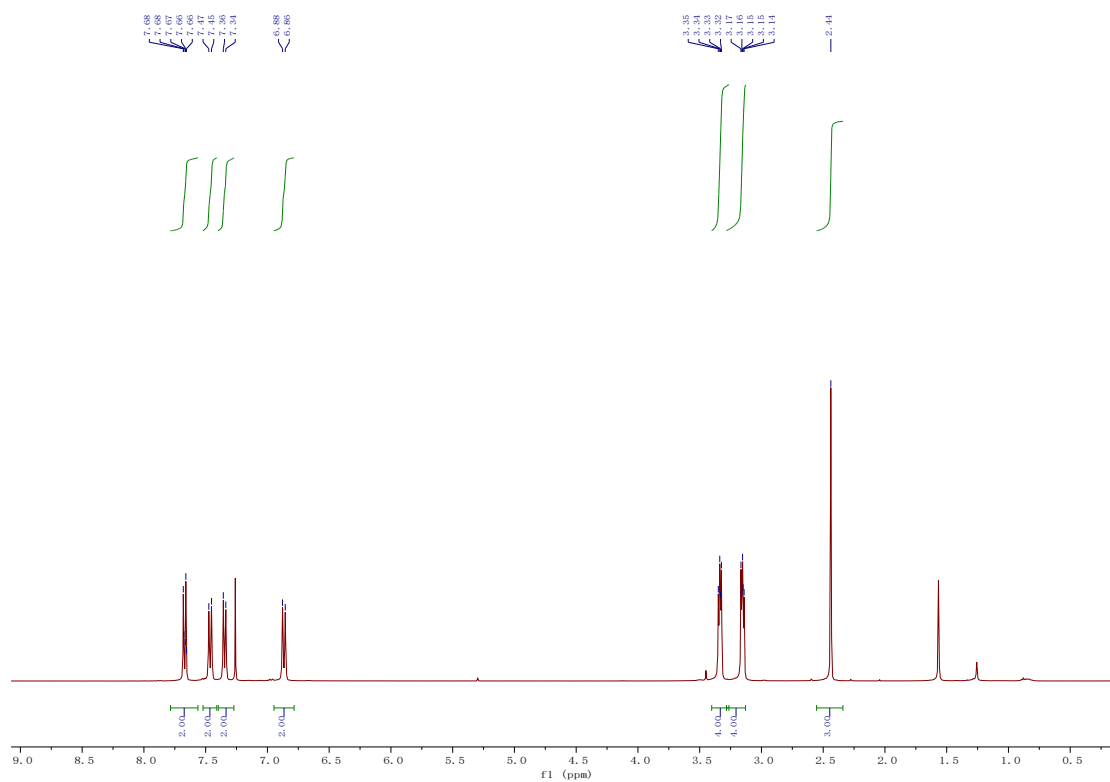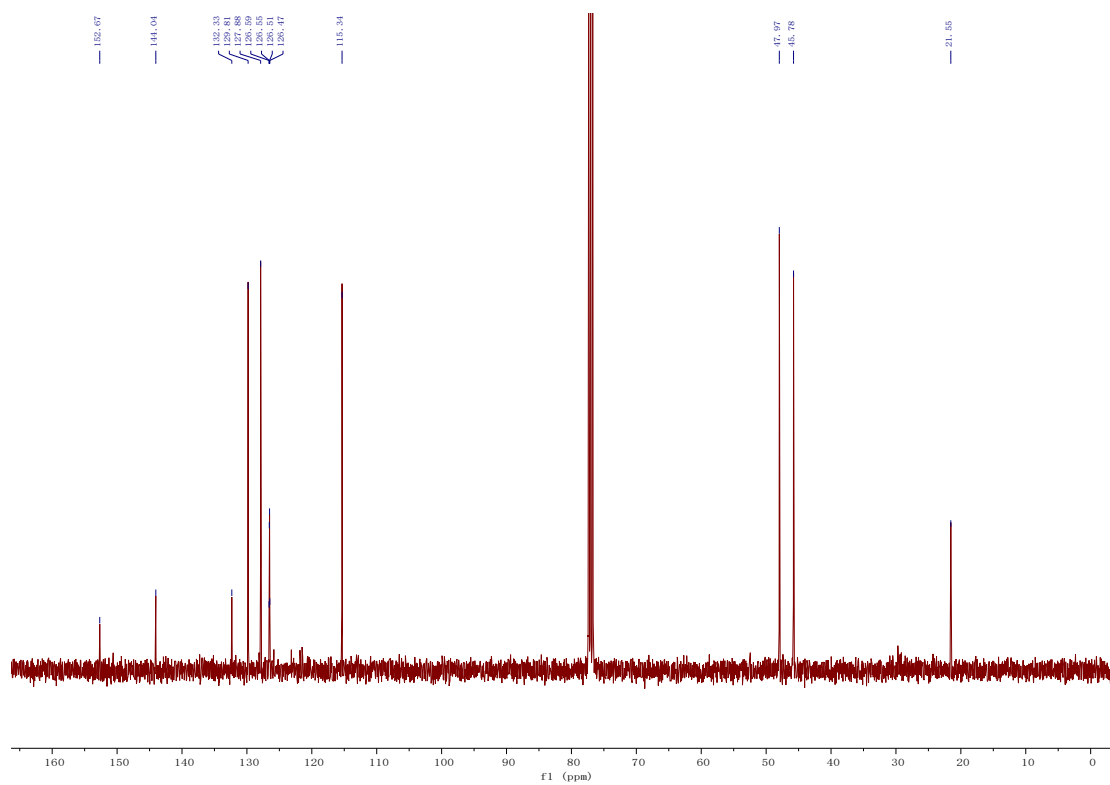



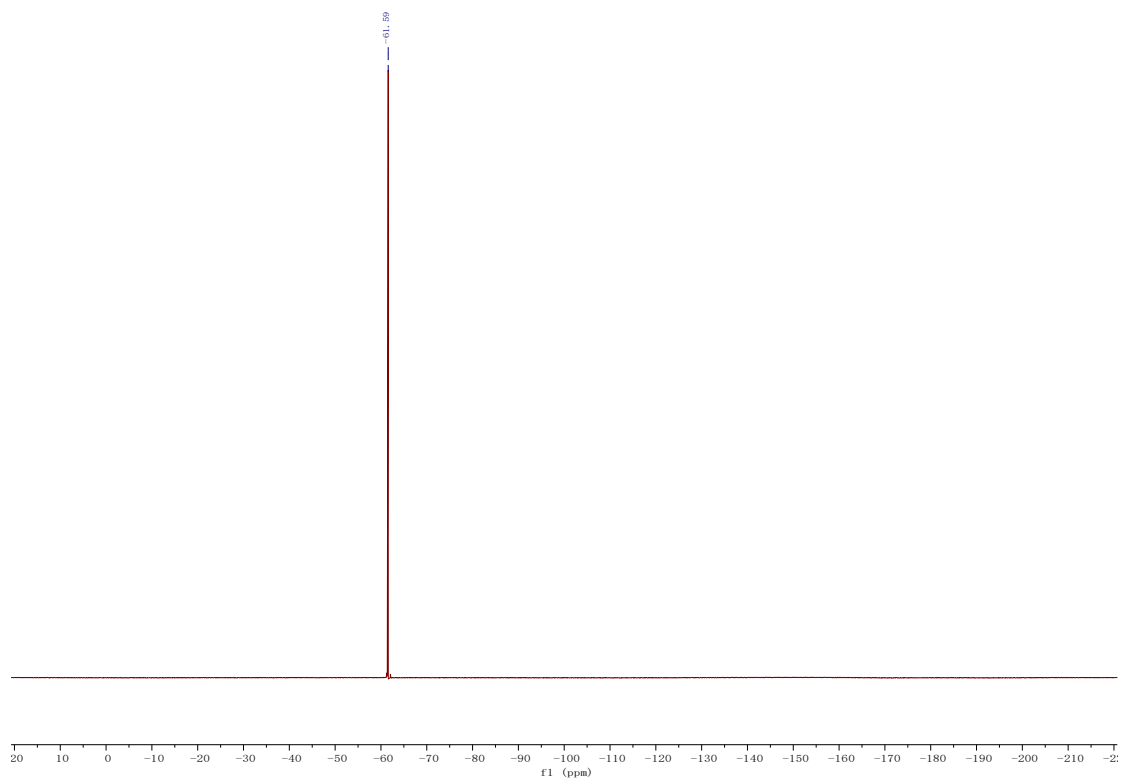

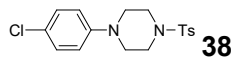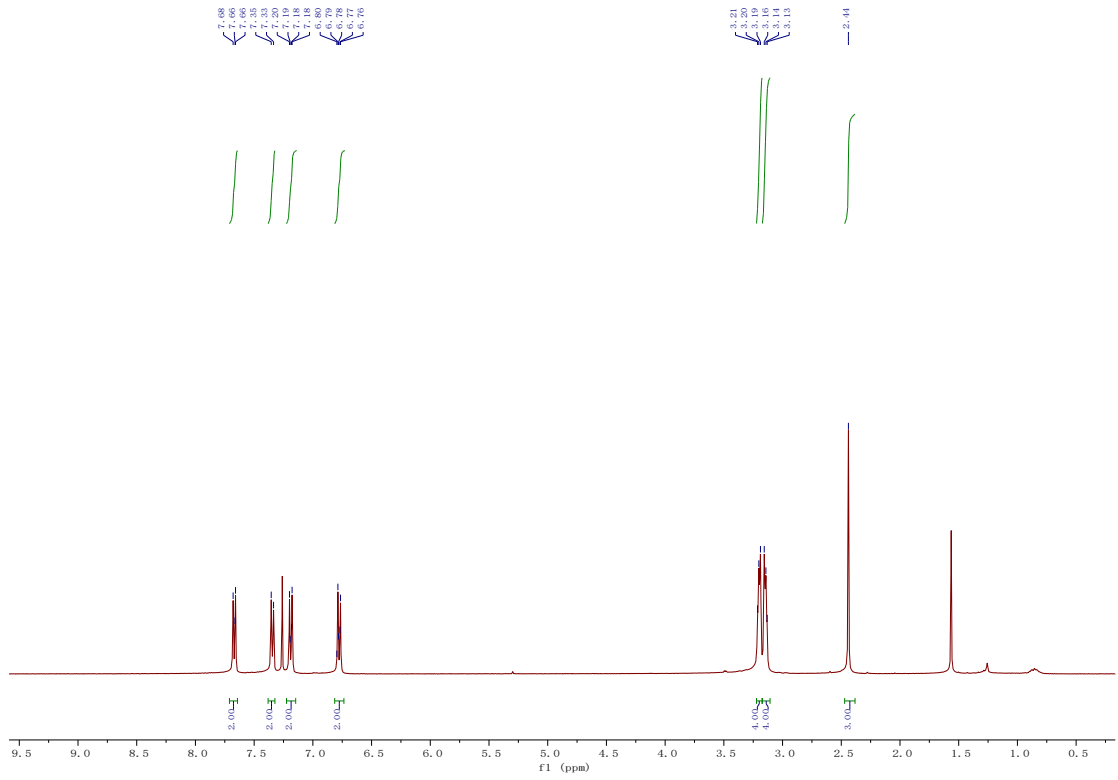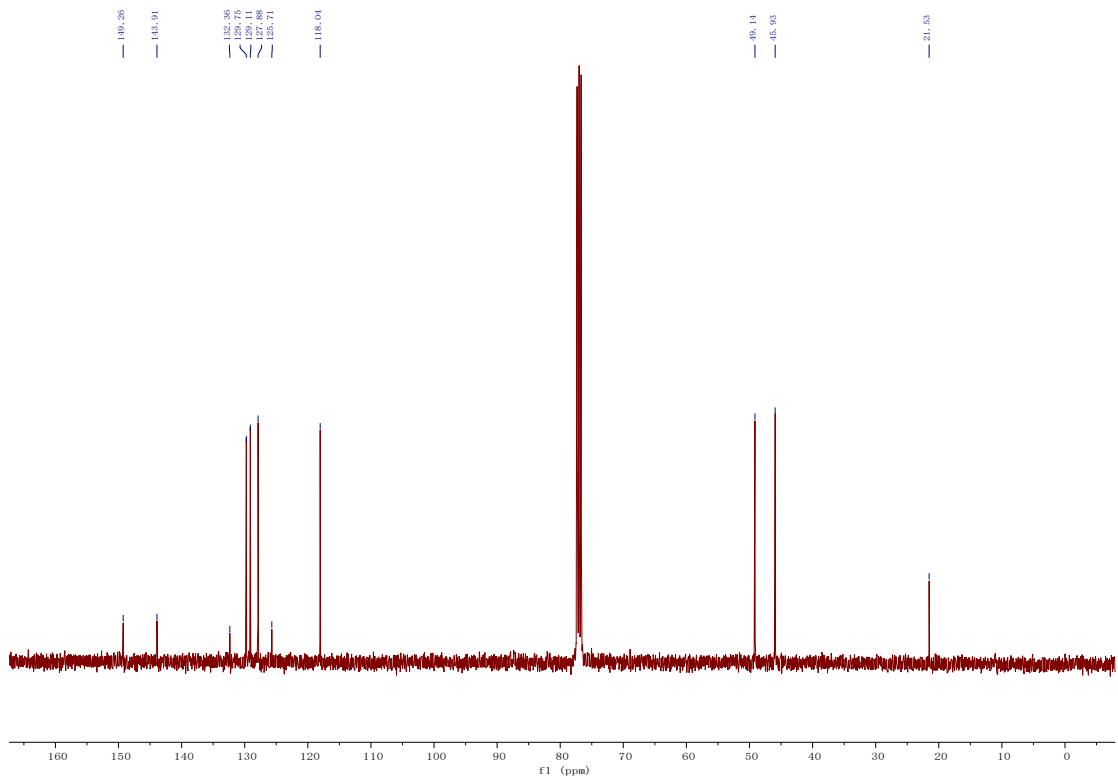

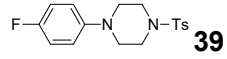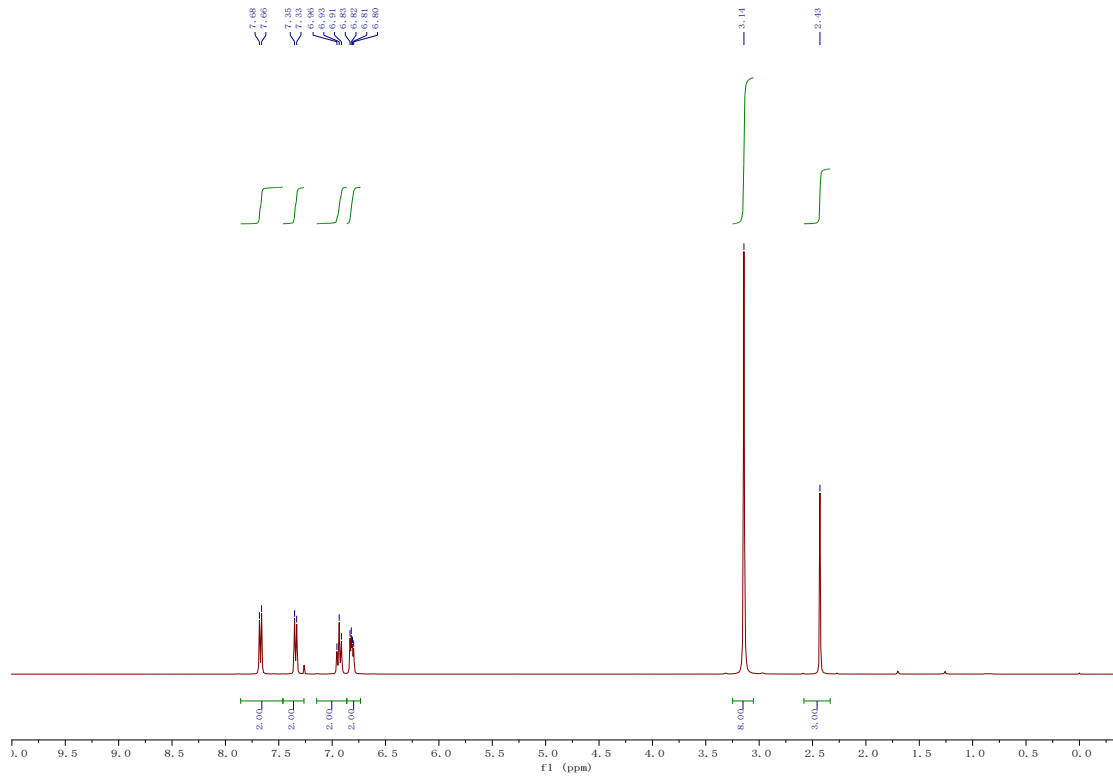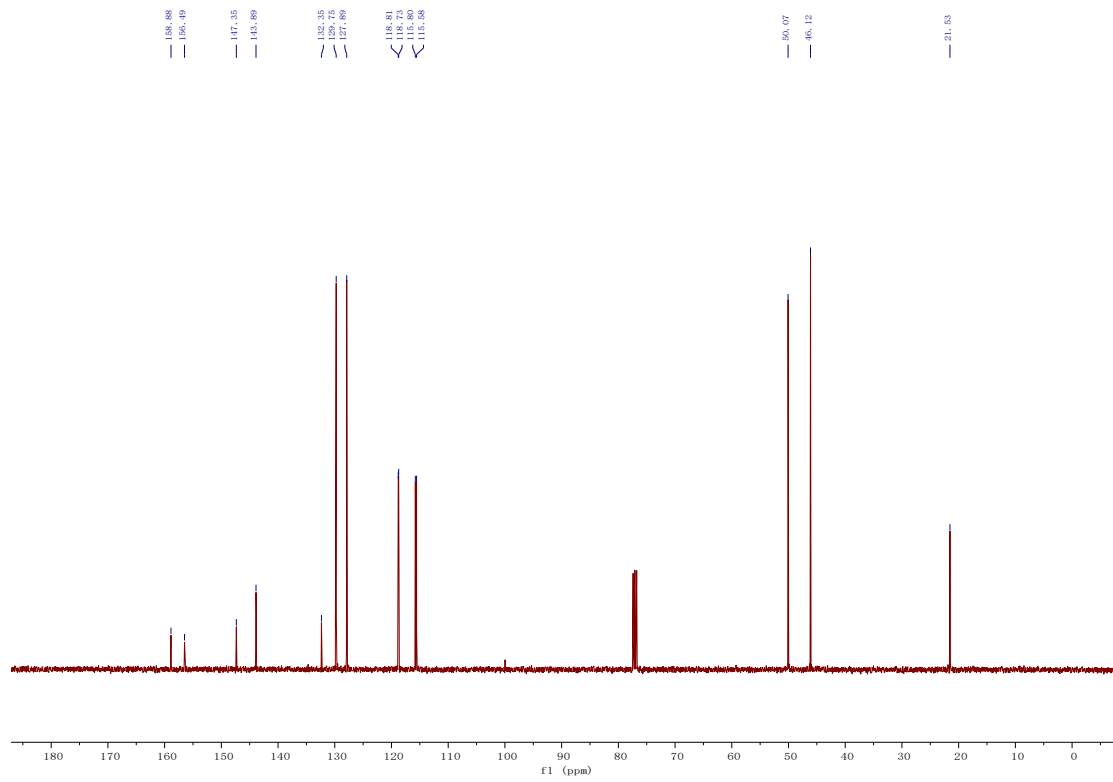

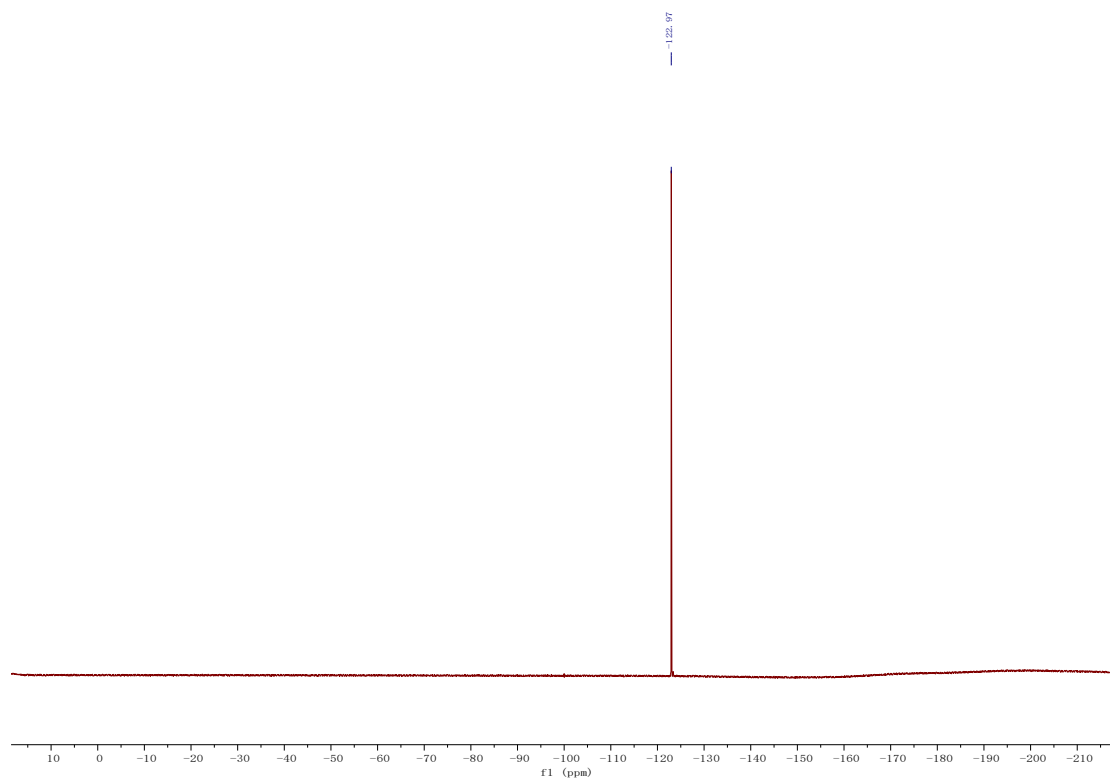

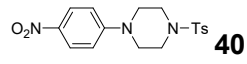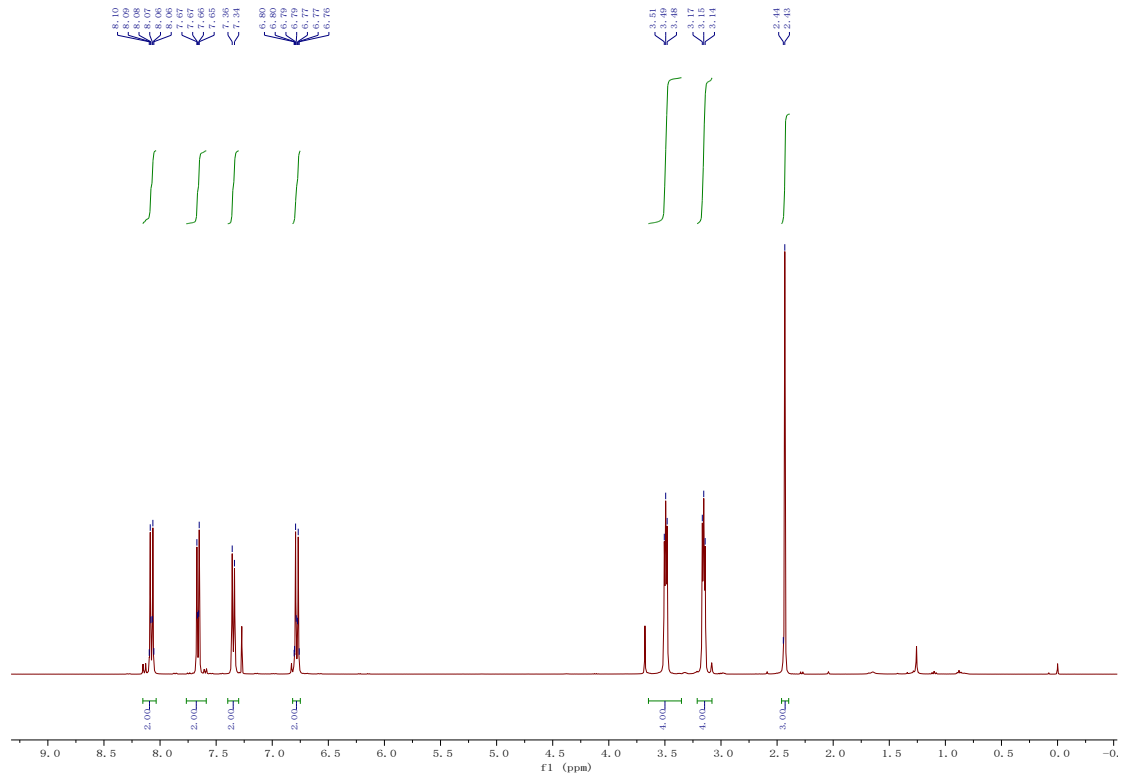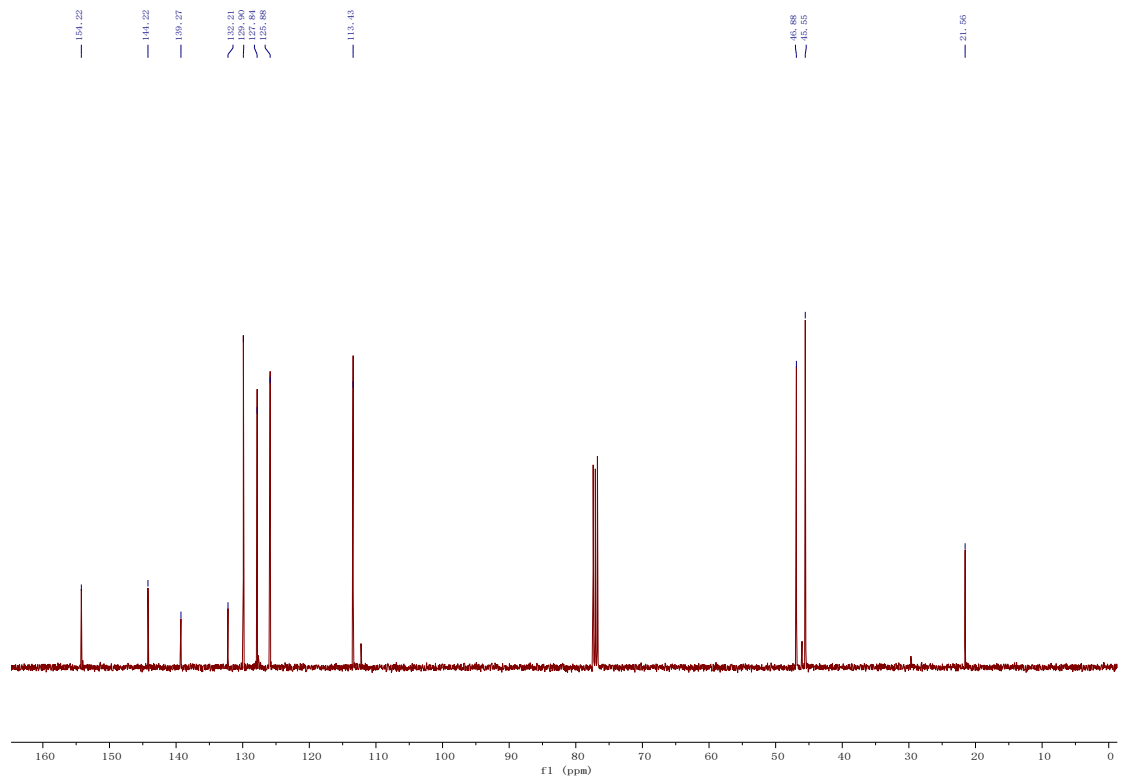

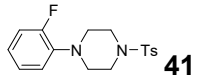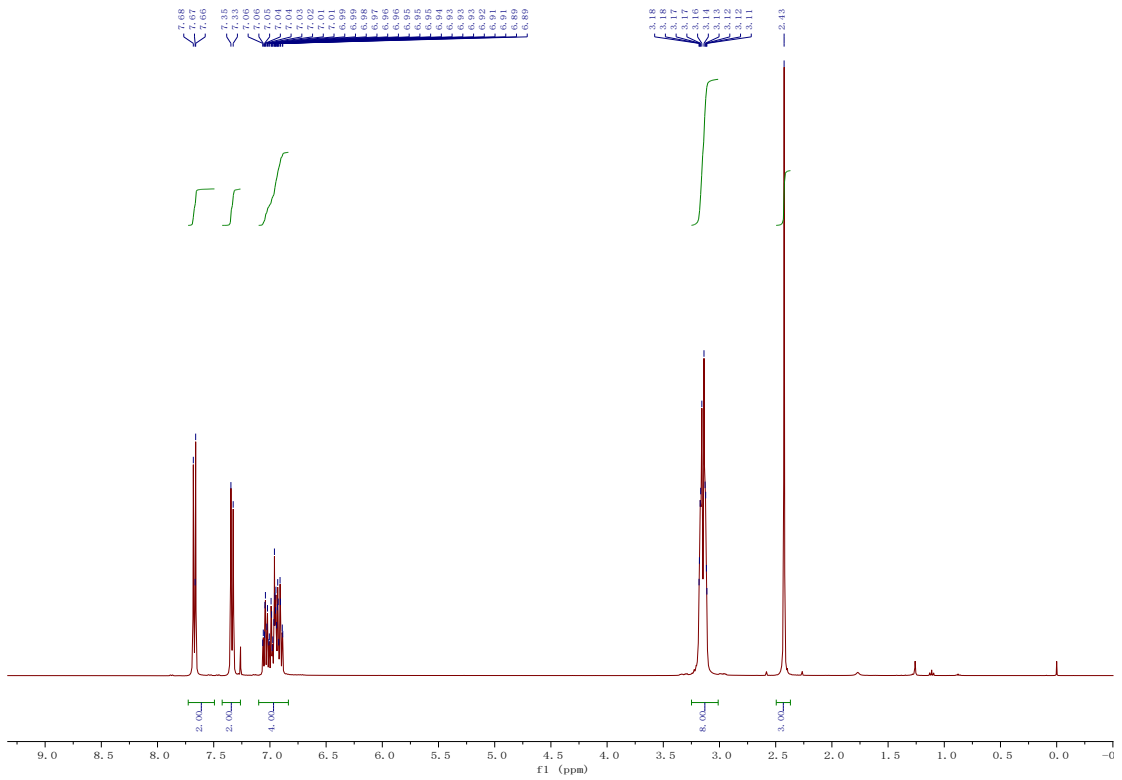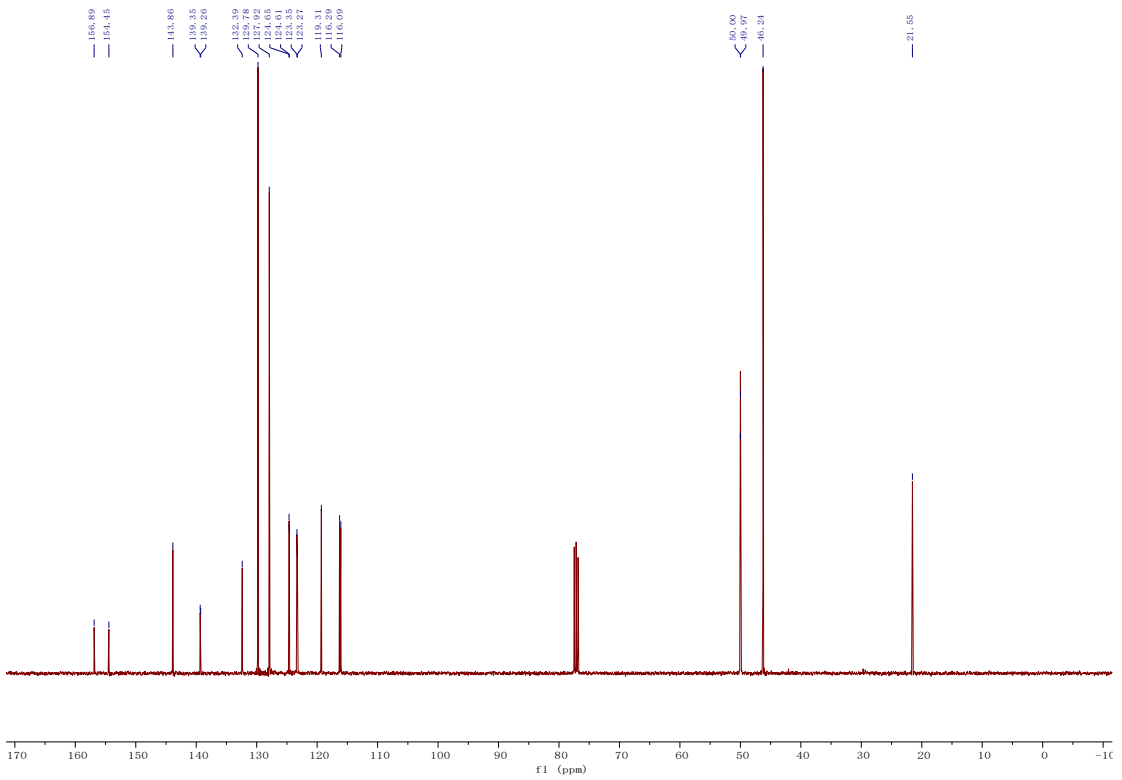

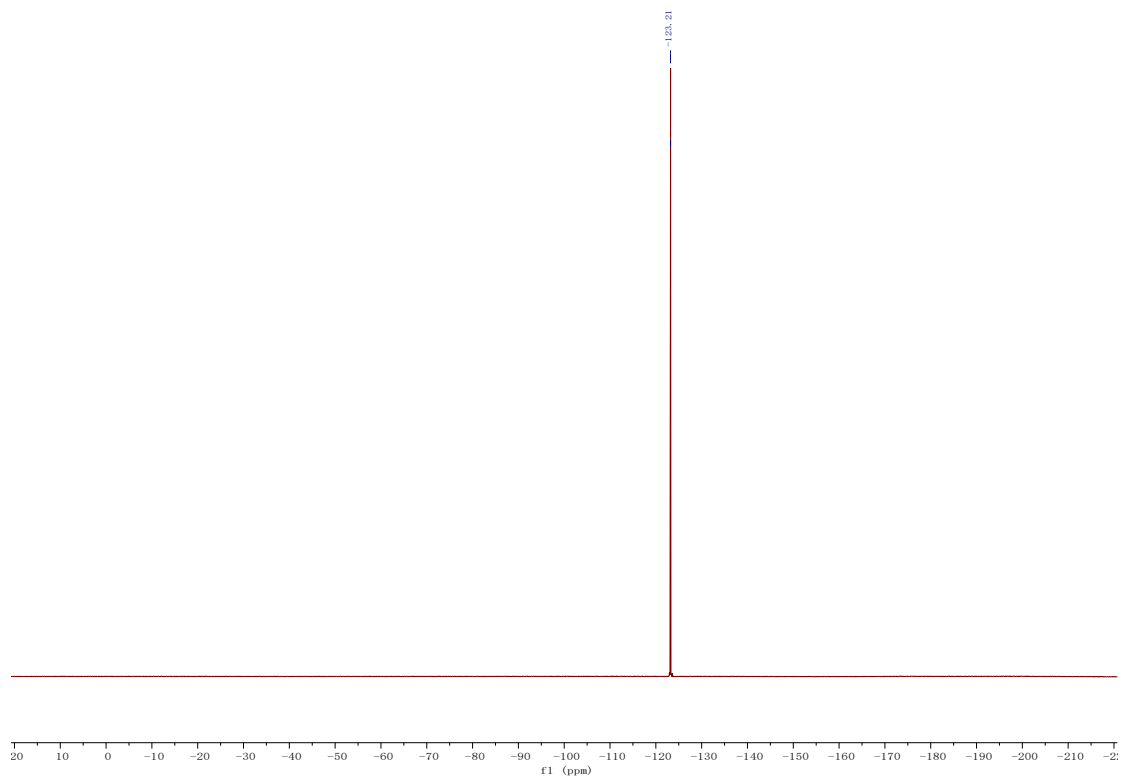

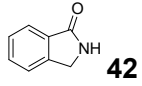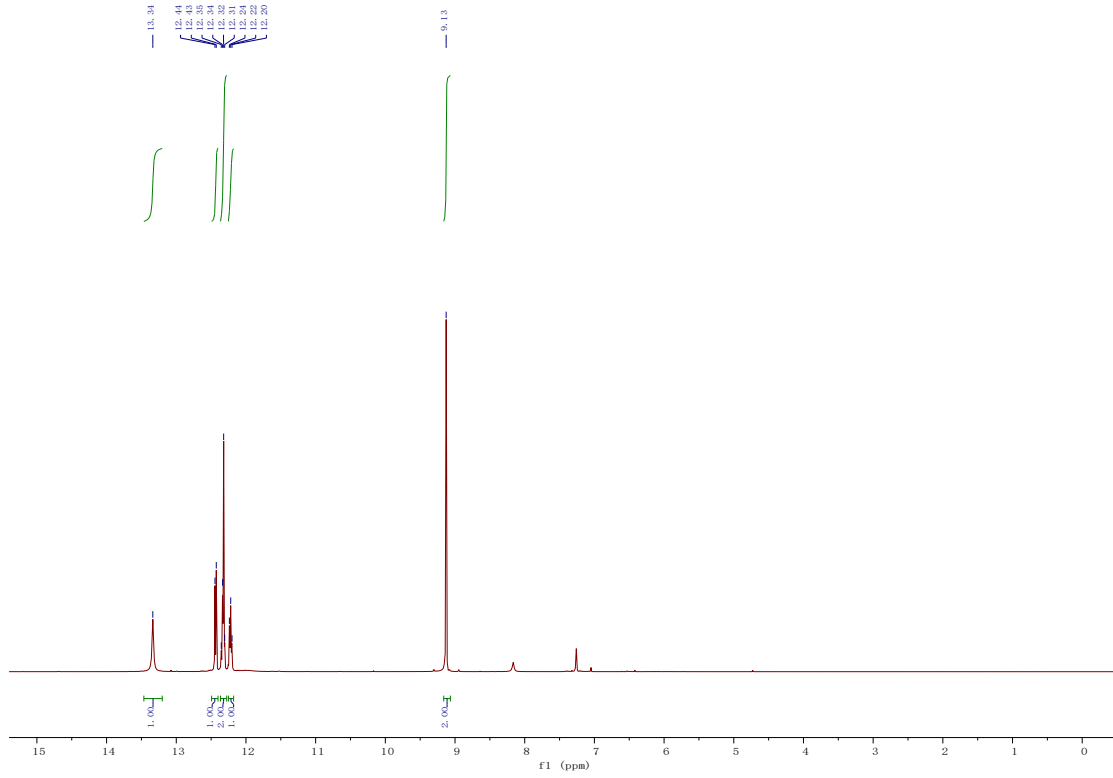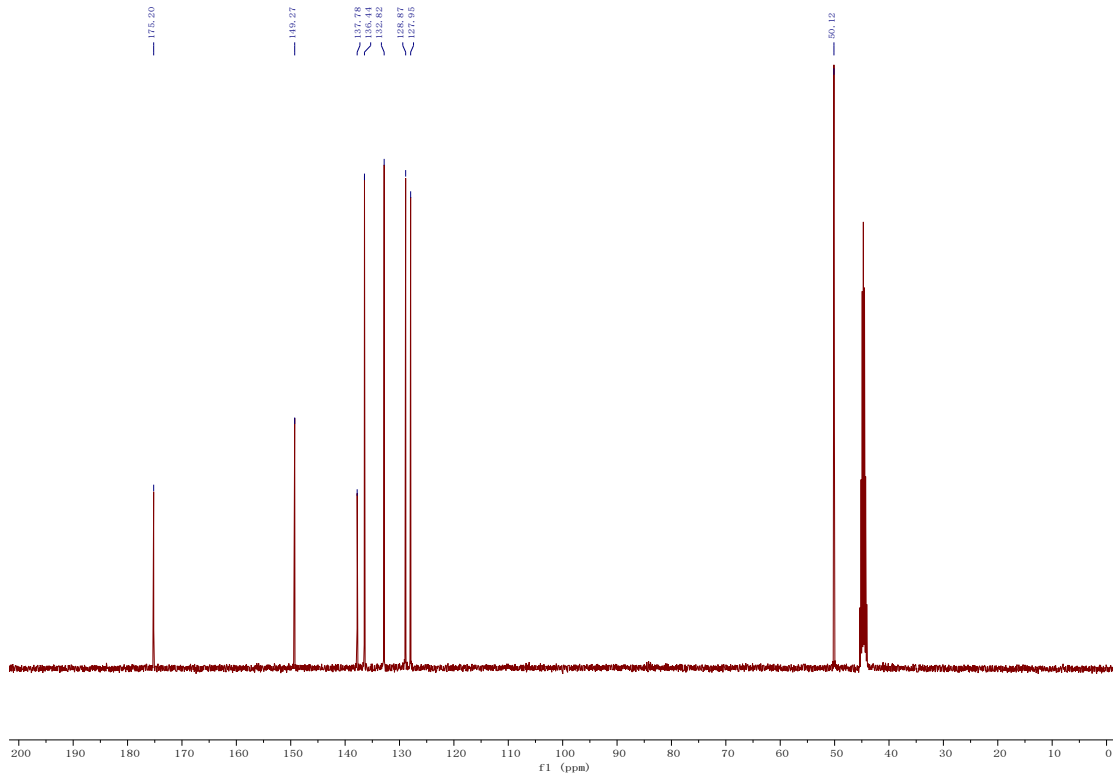



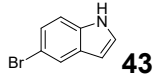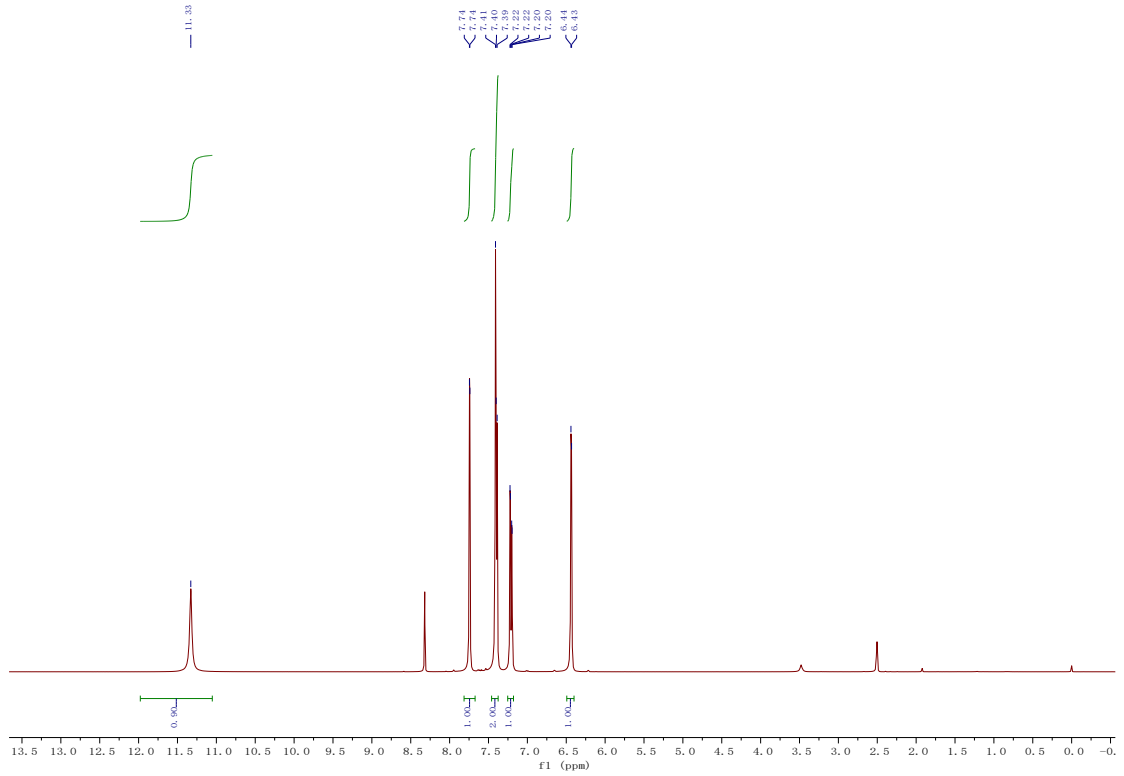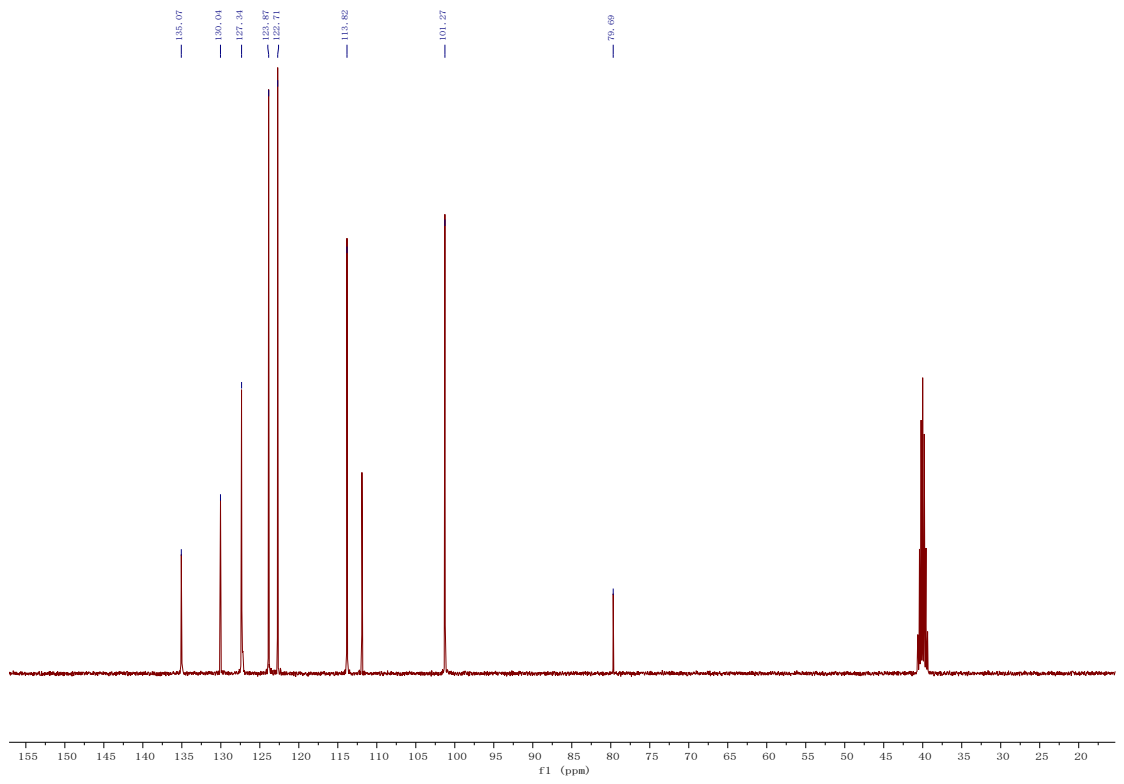

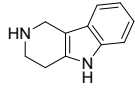

44

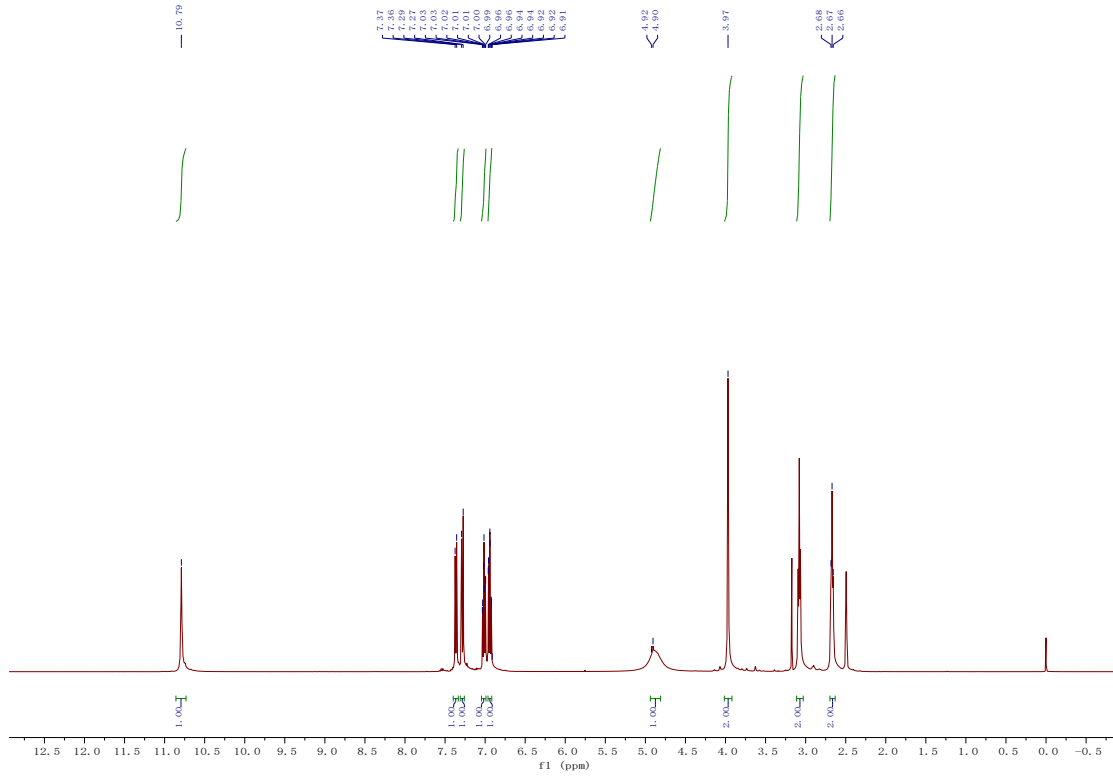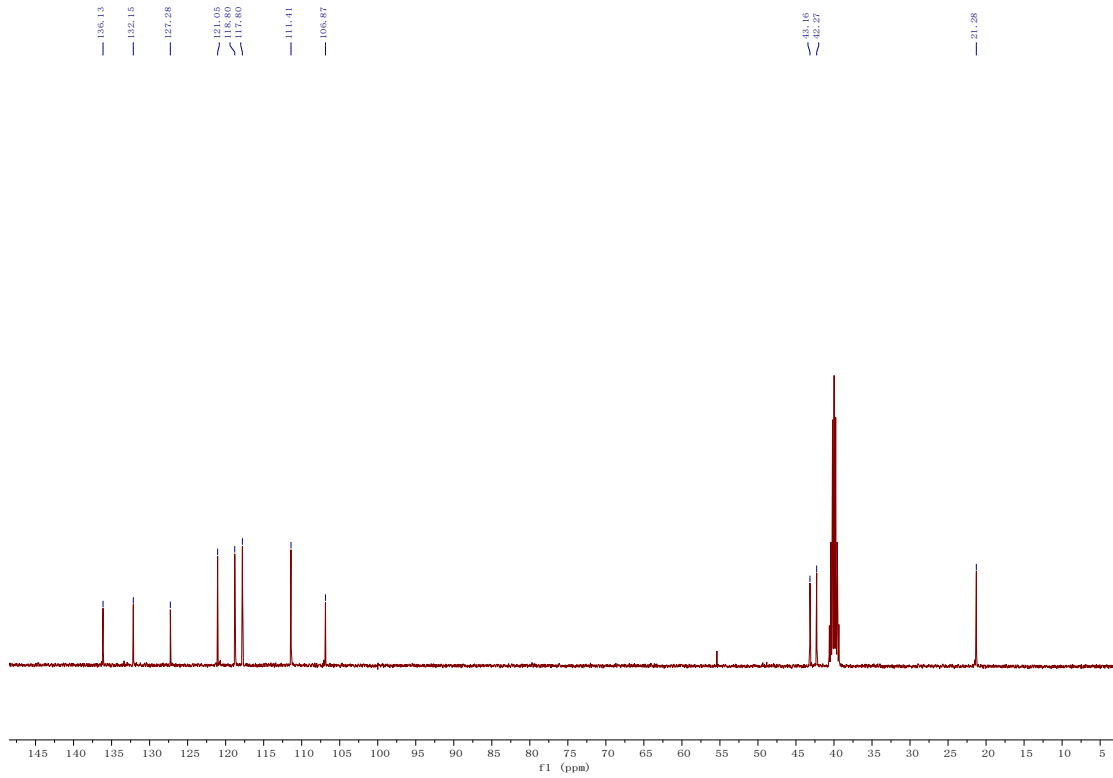

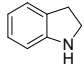

45

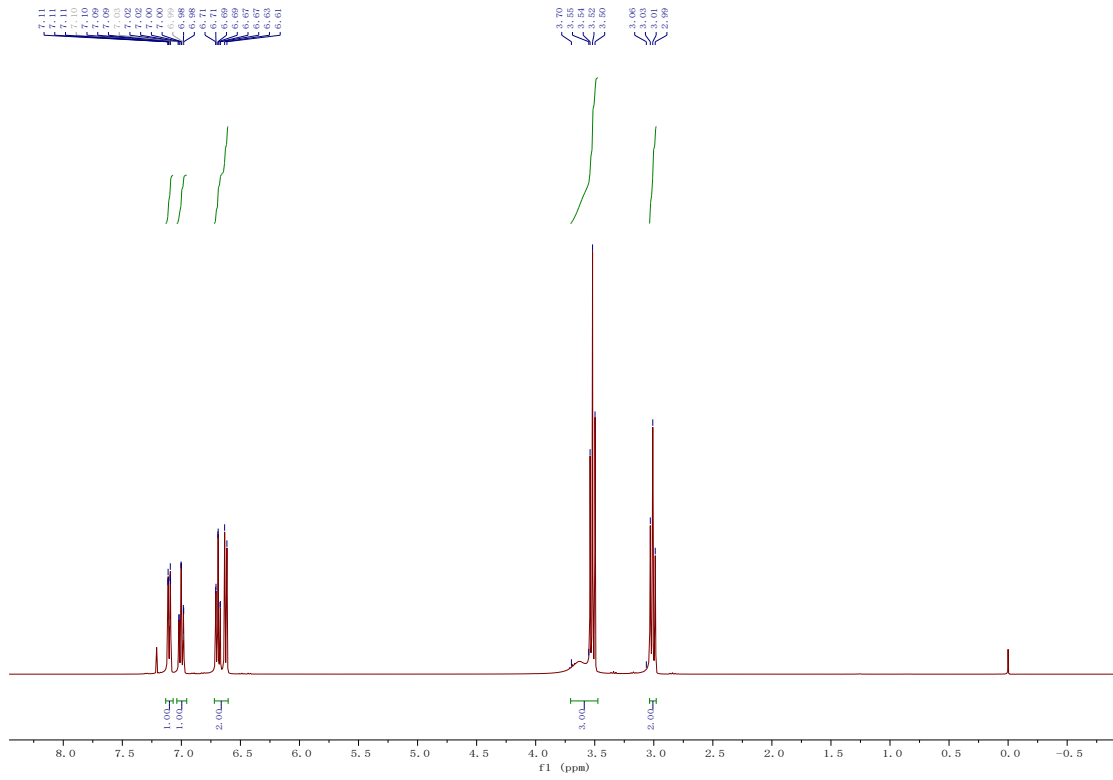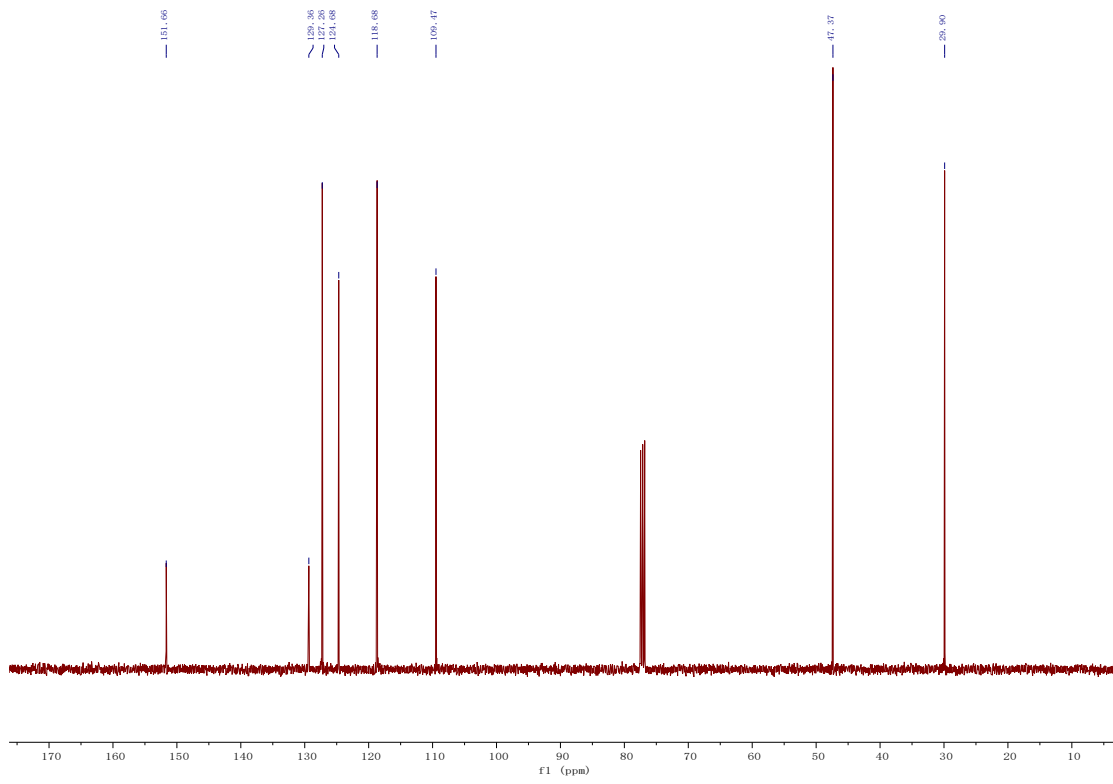

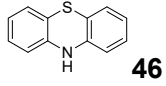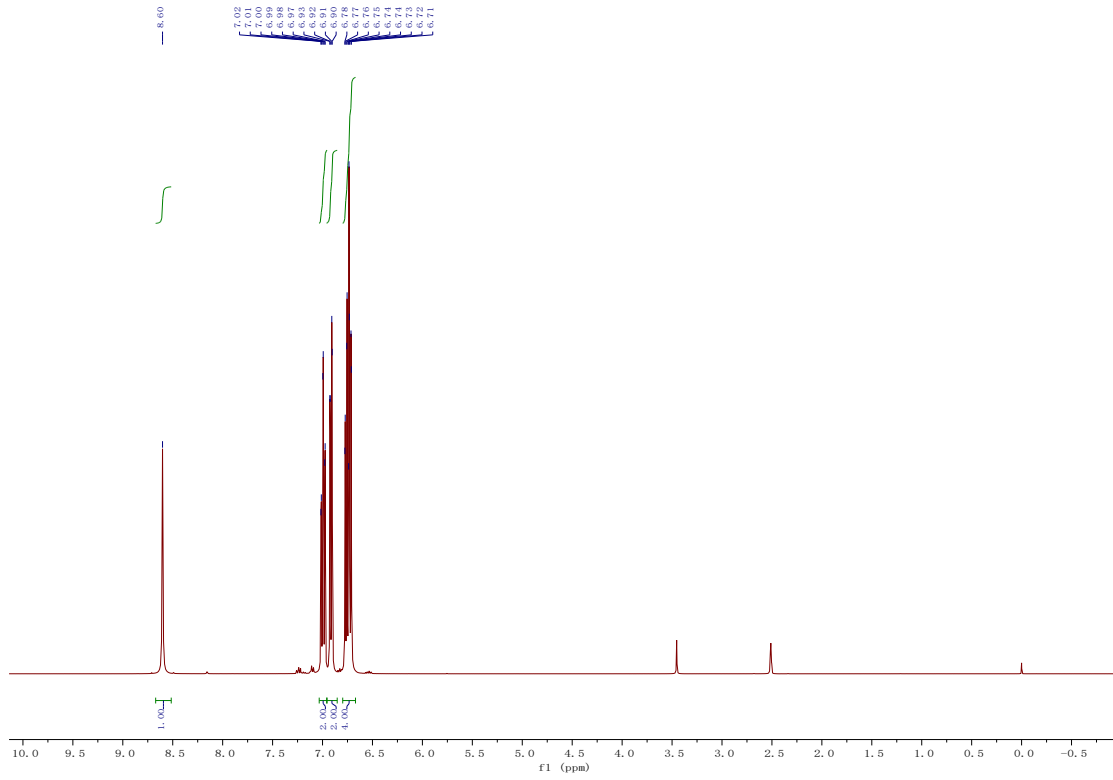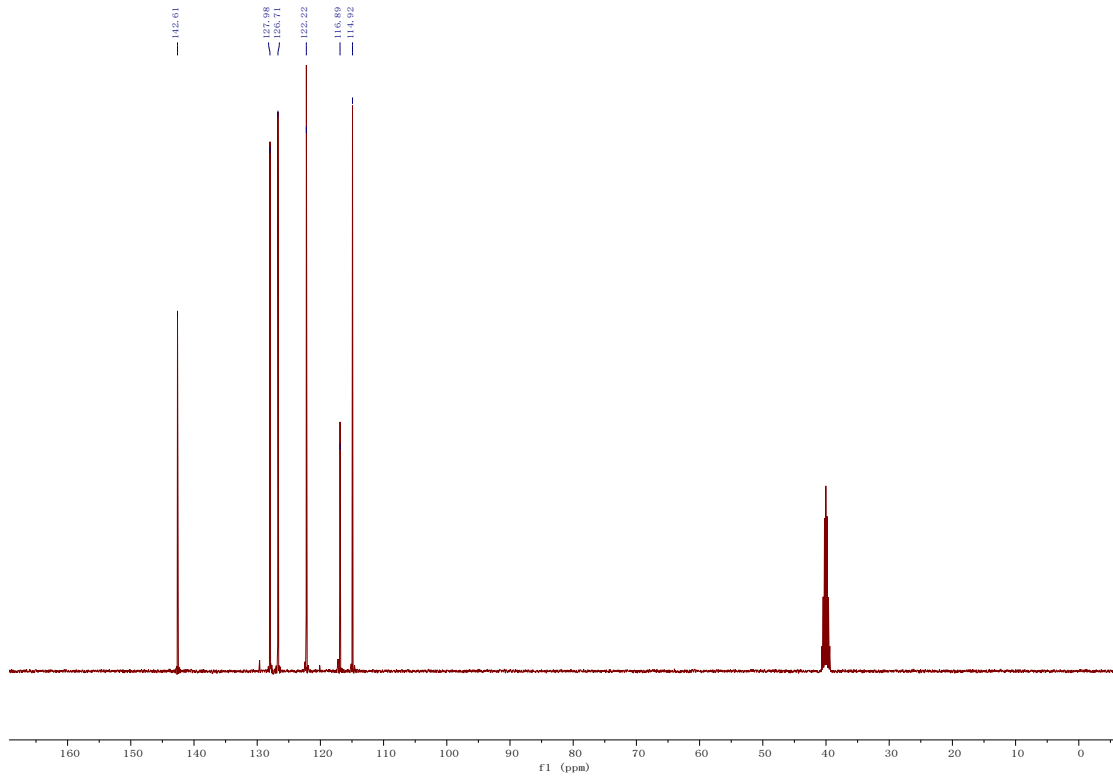



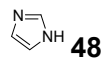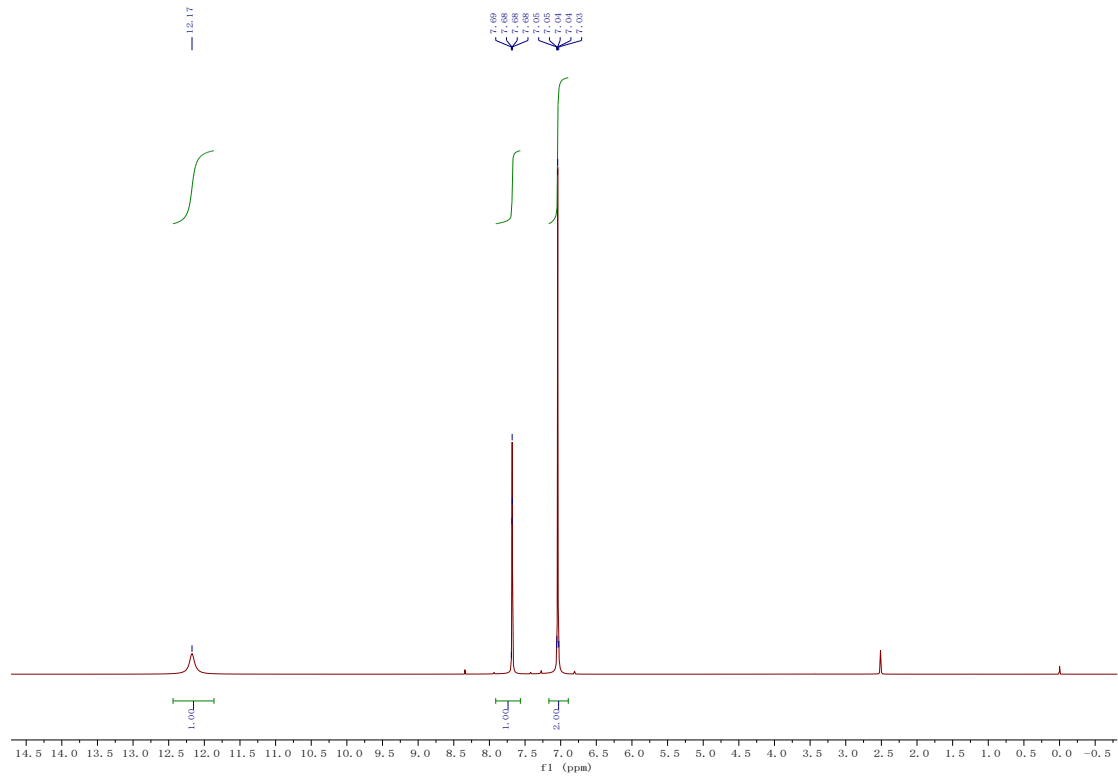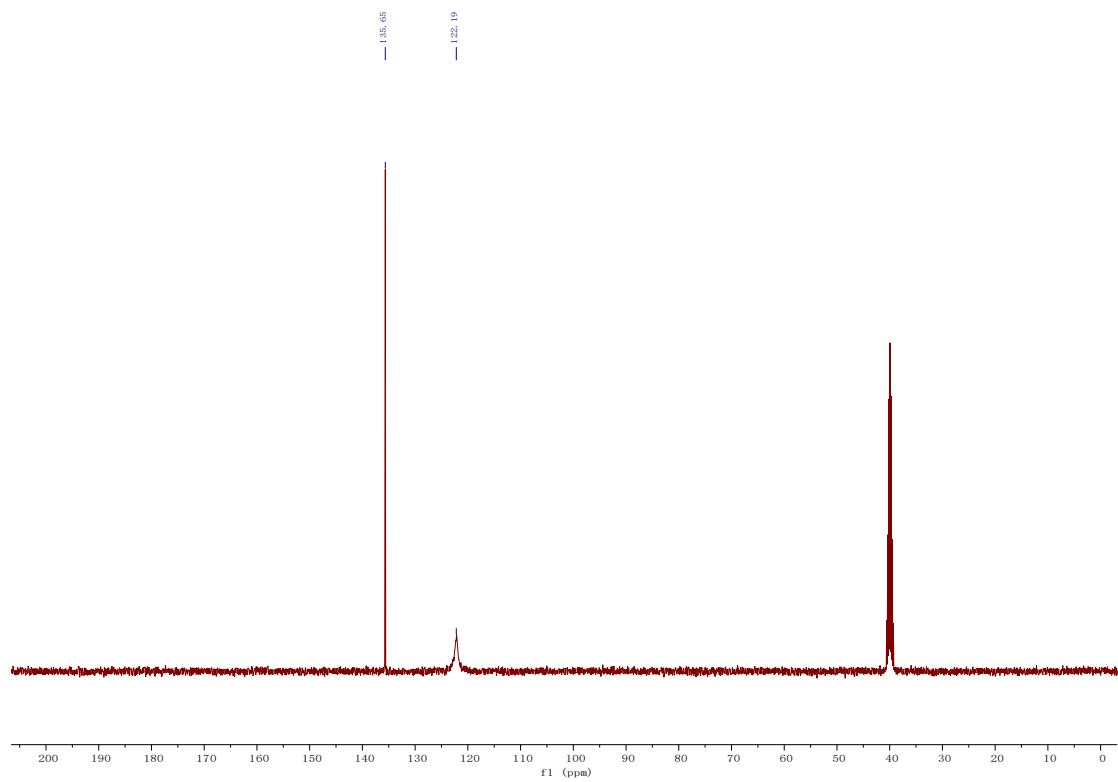

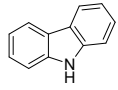

49

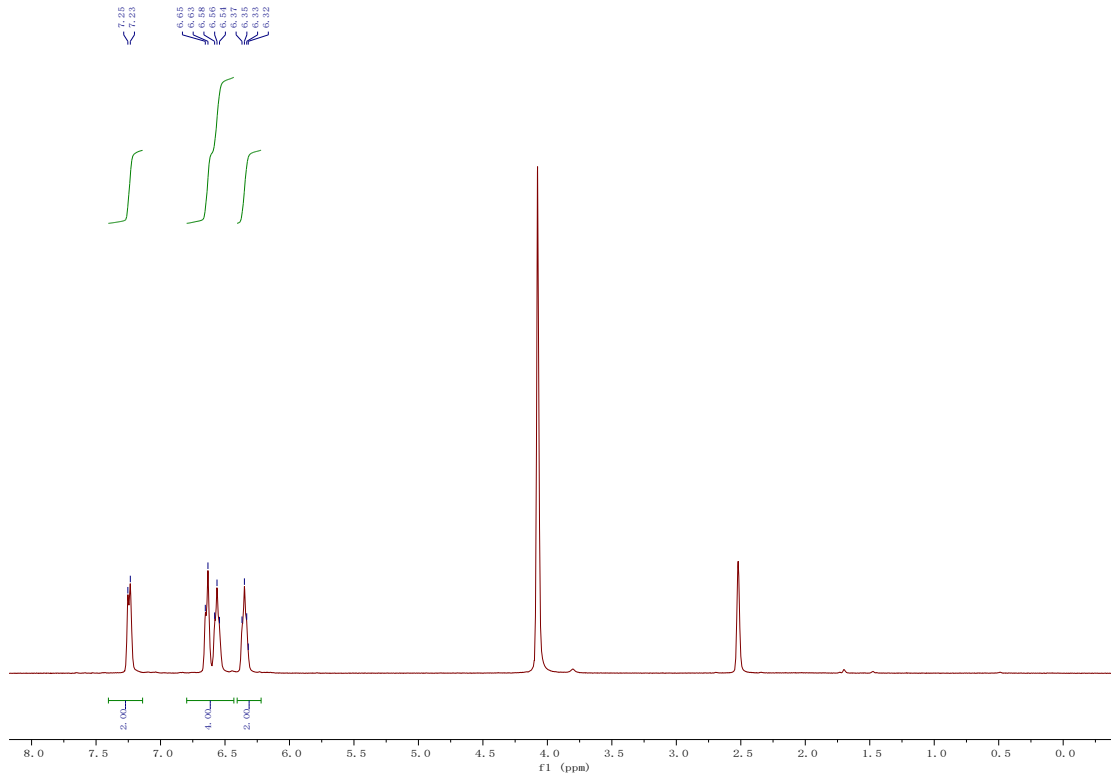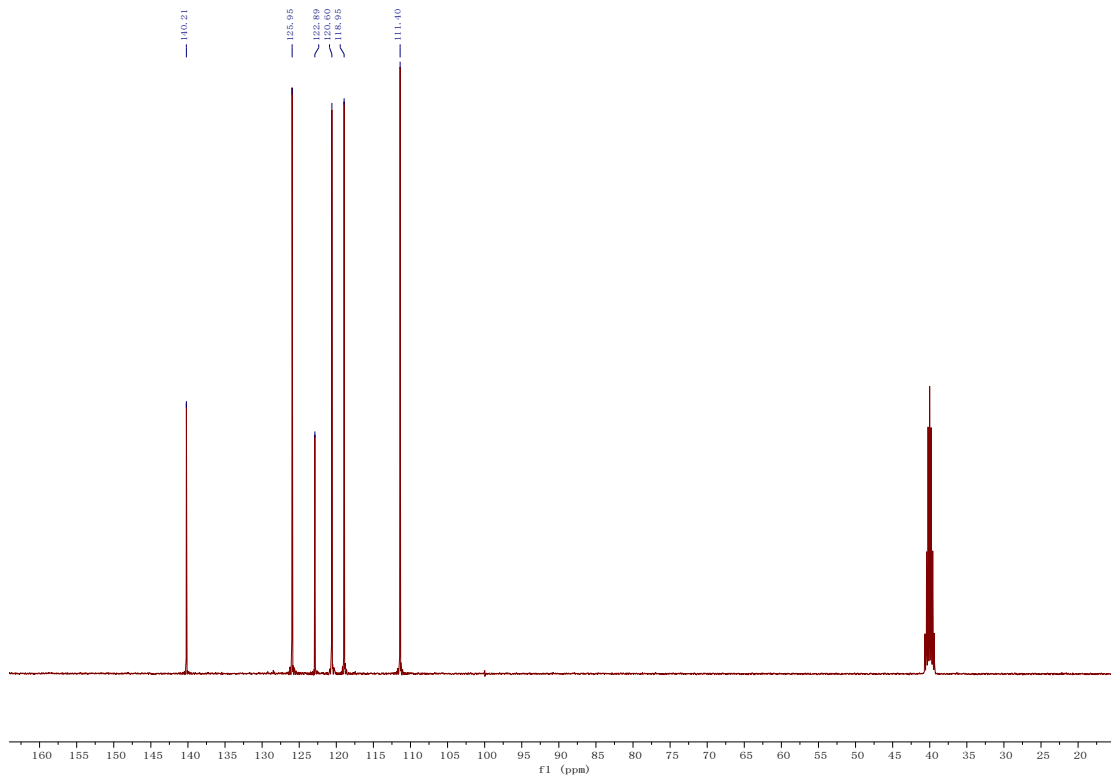

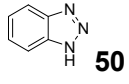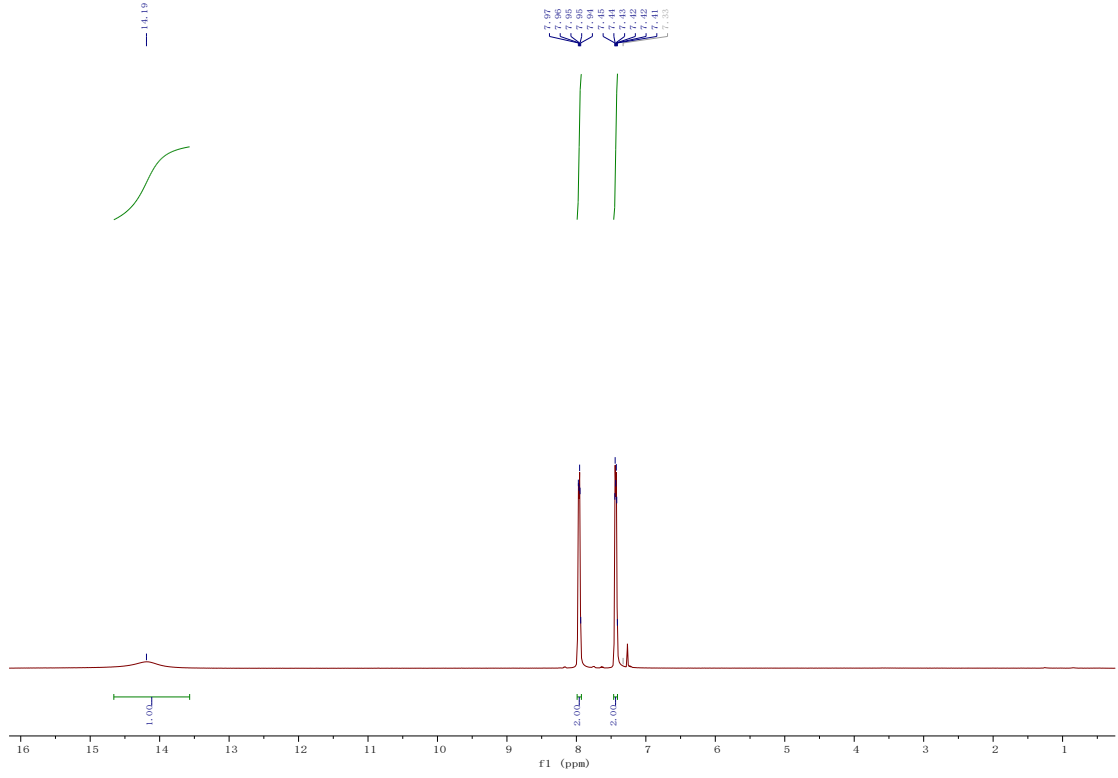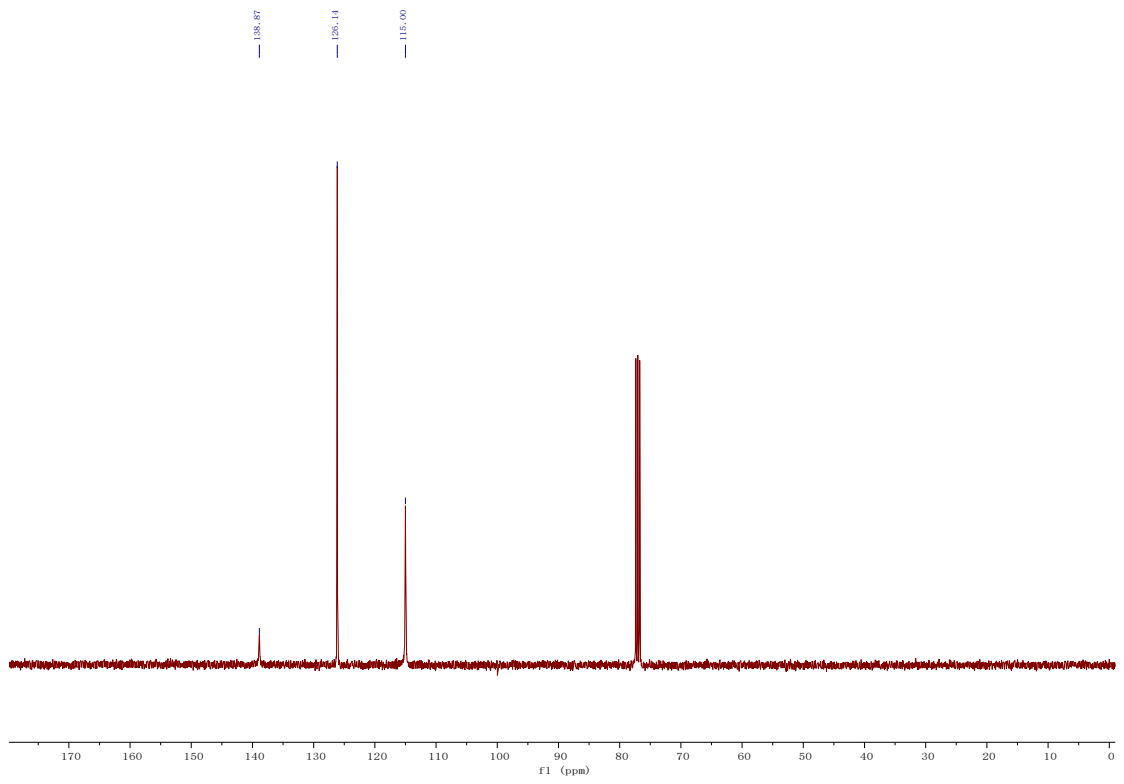



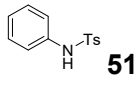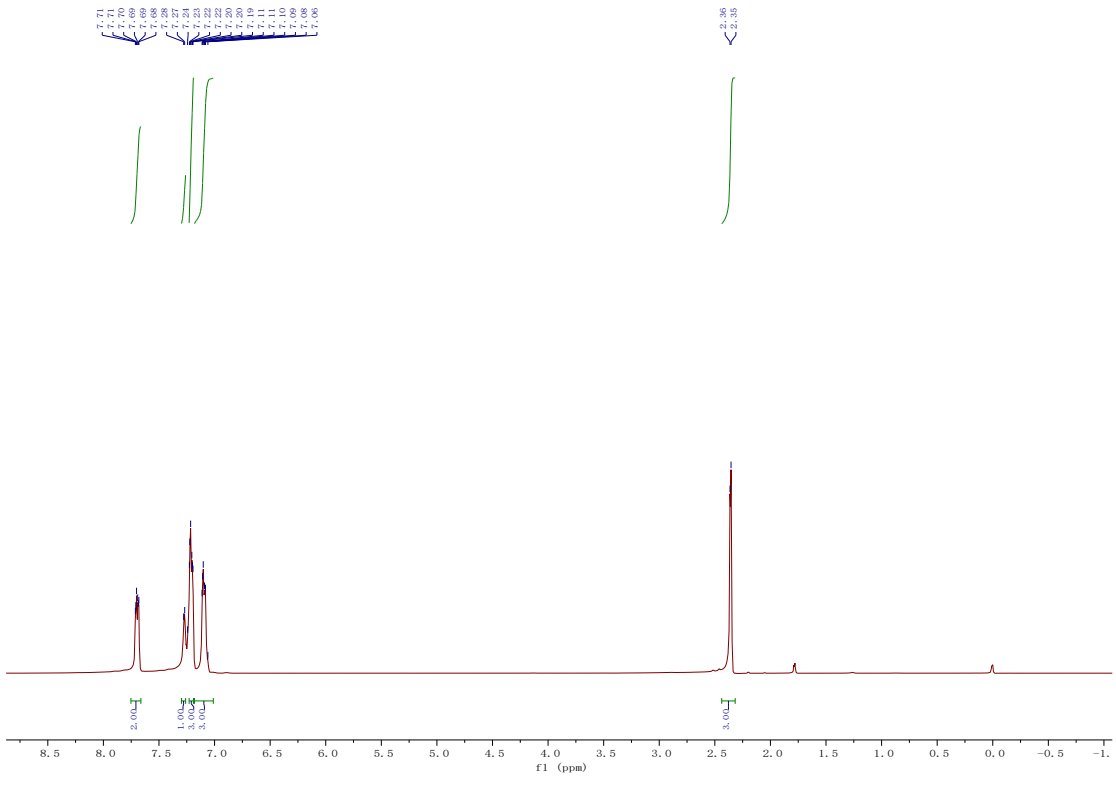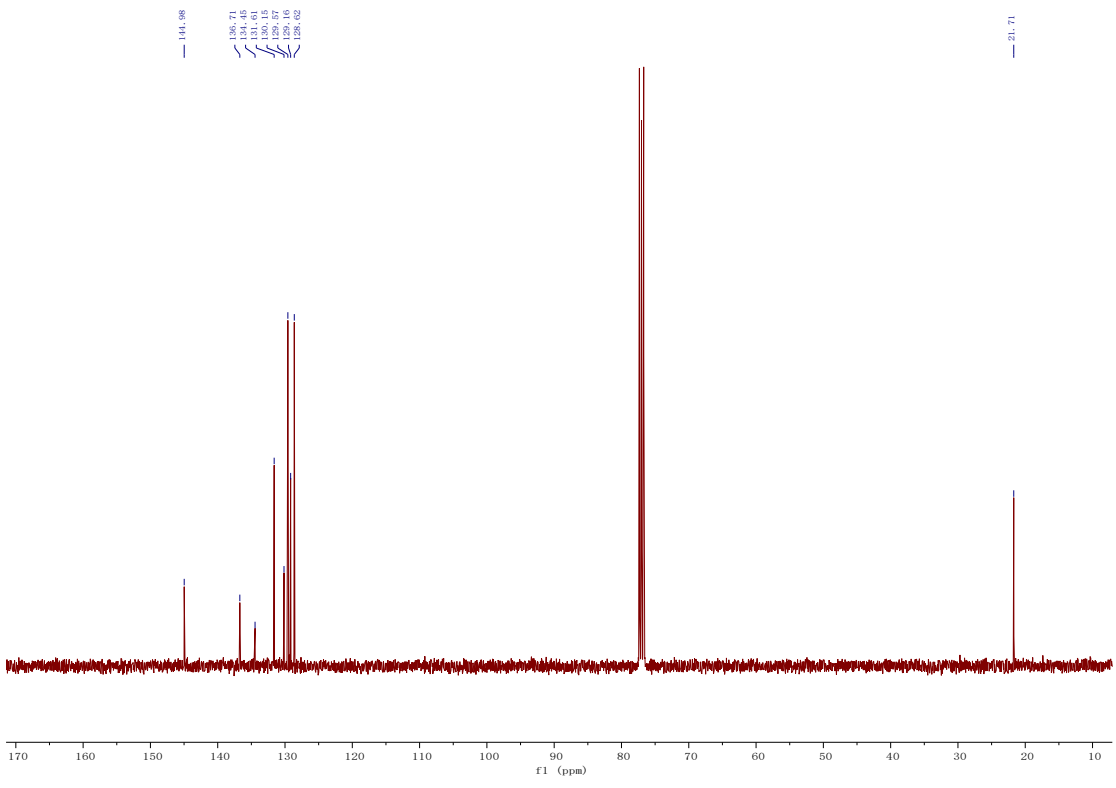

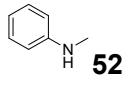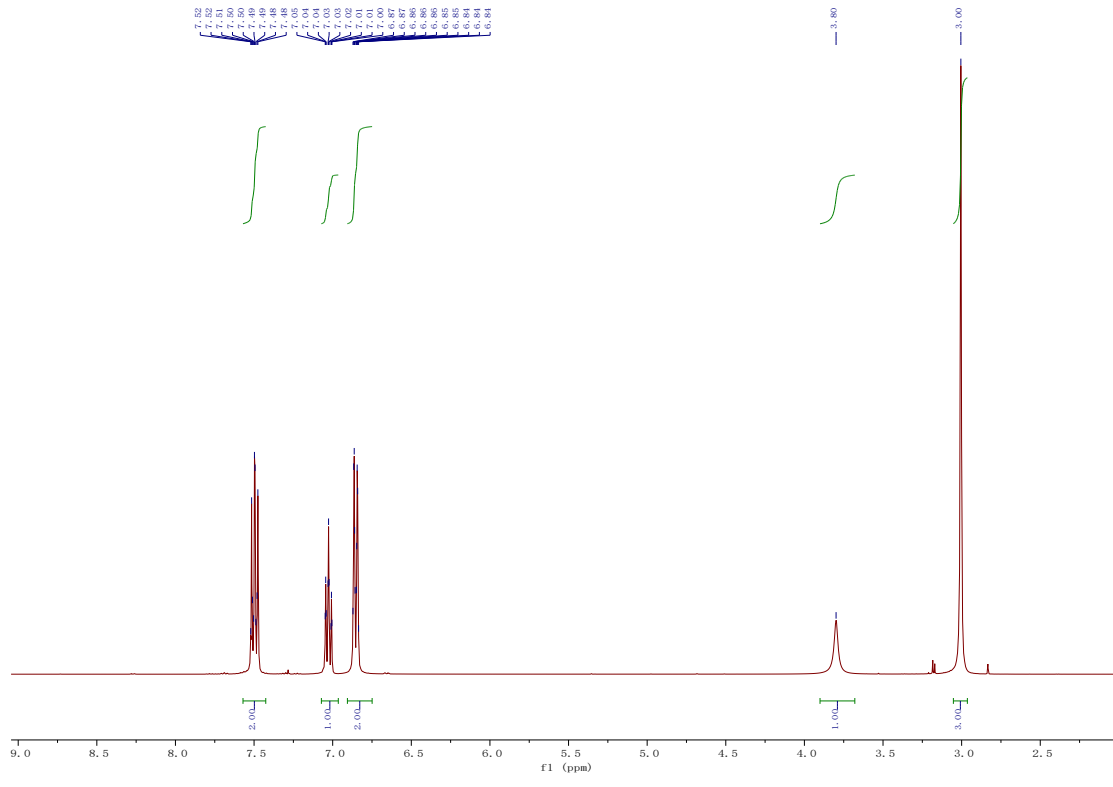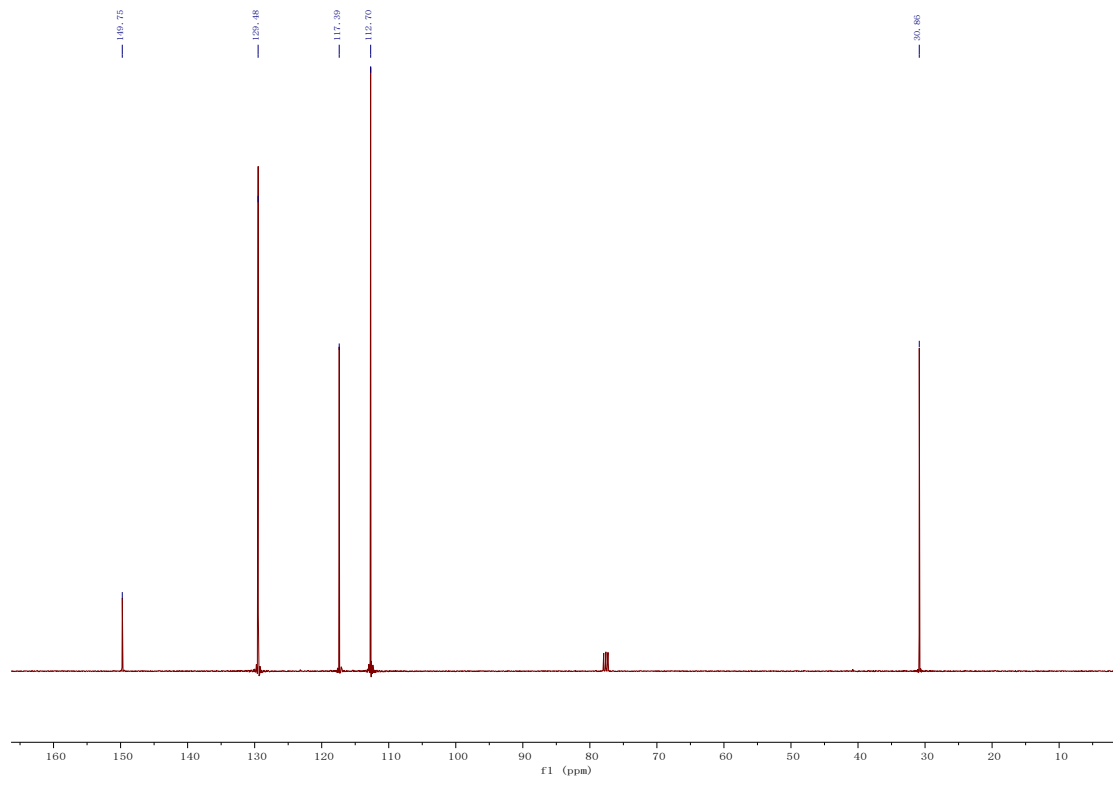

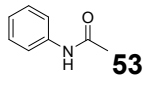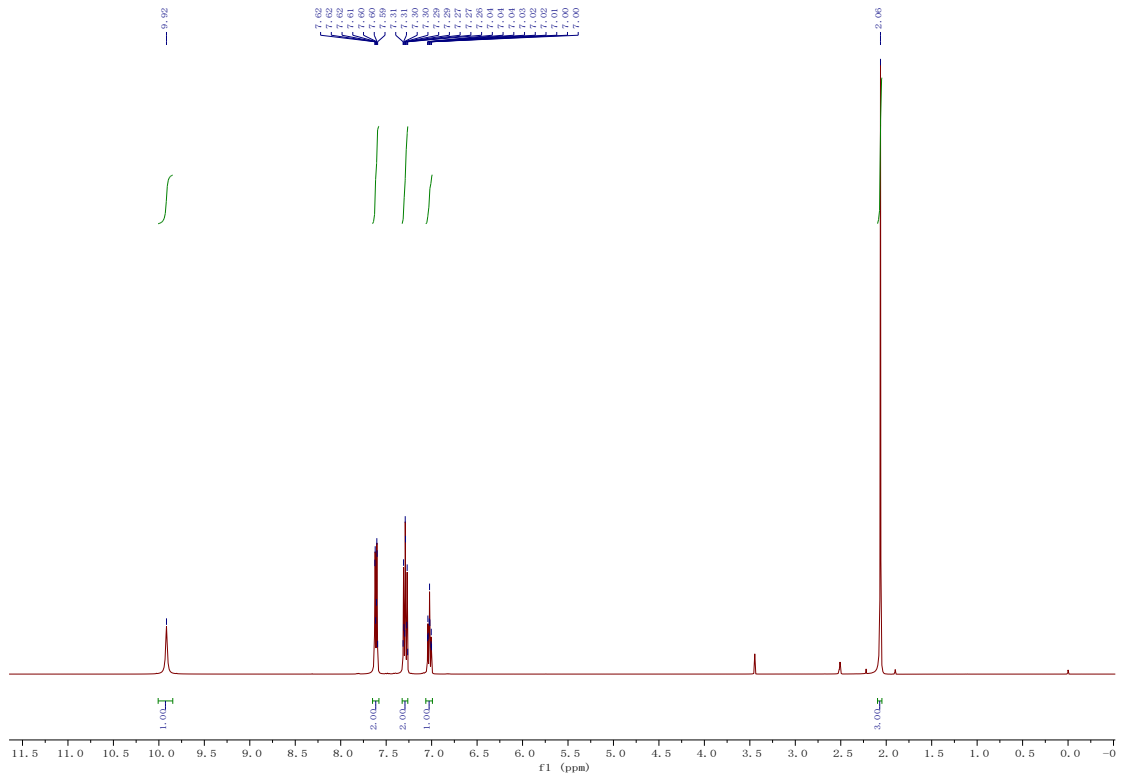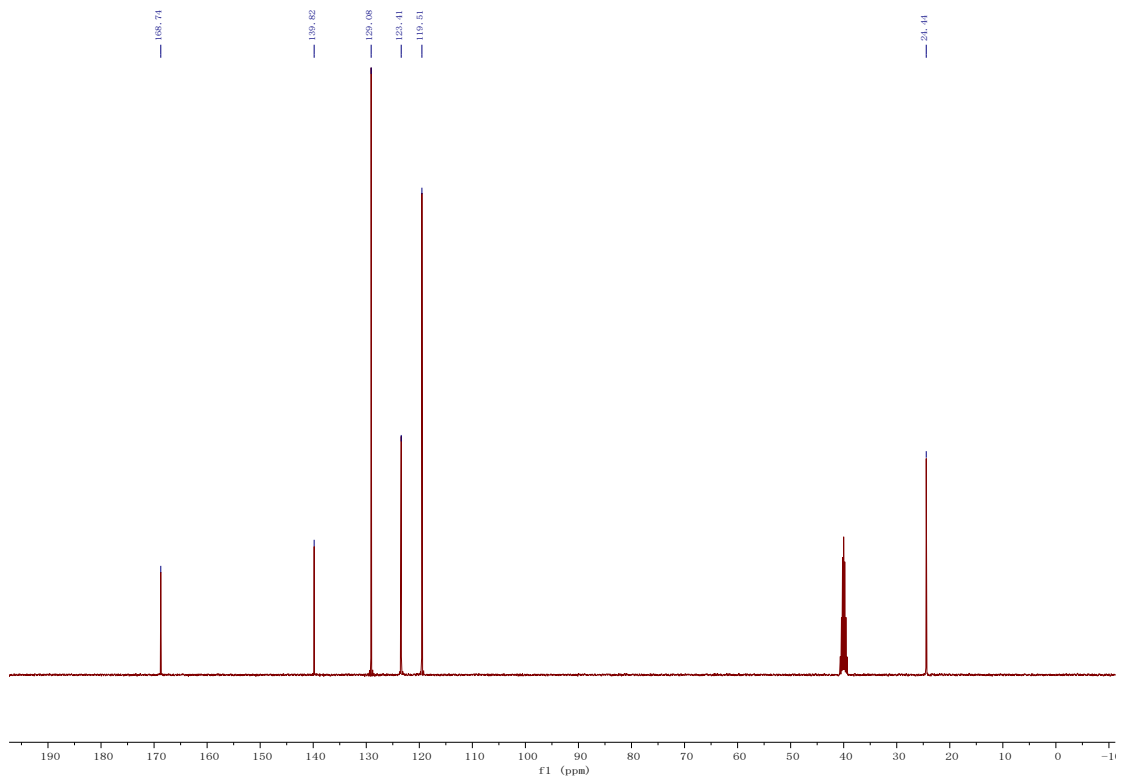

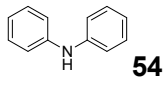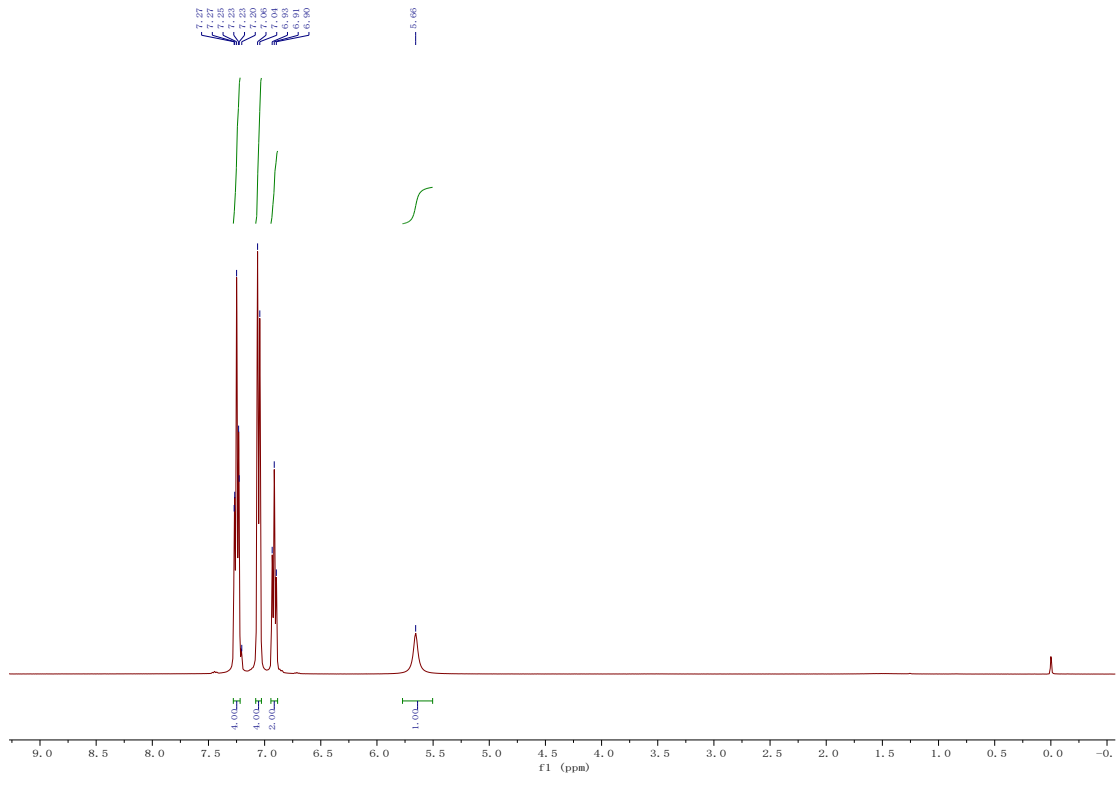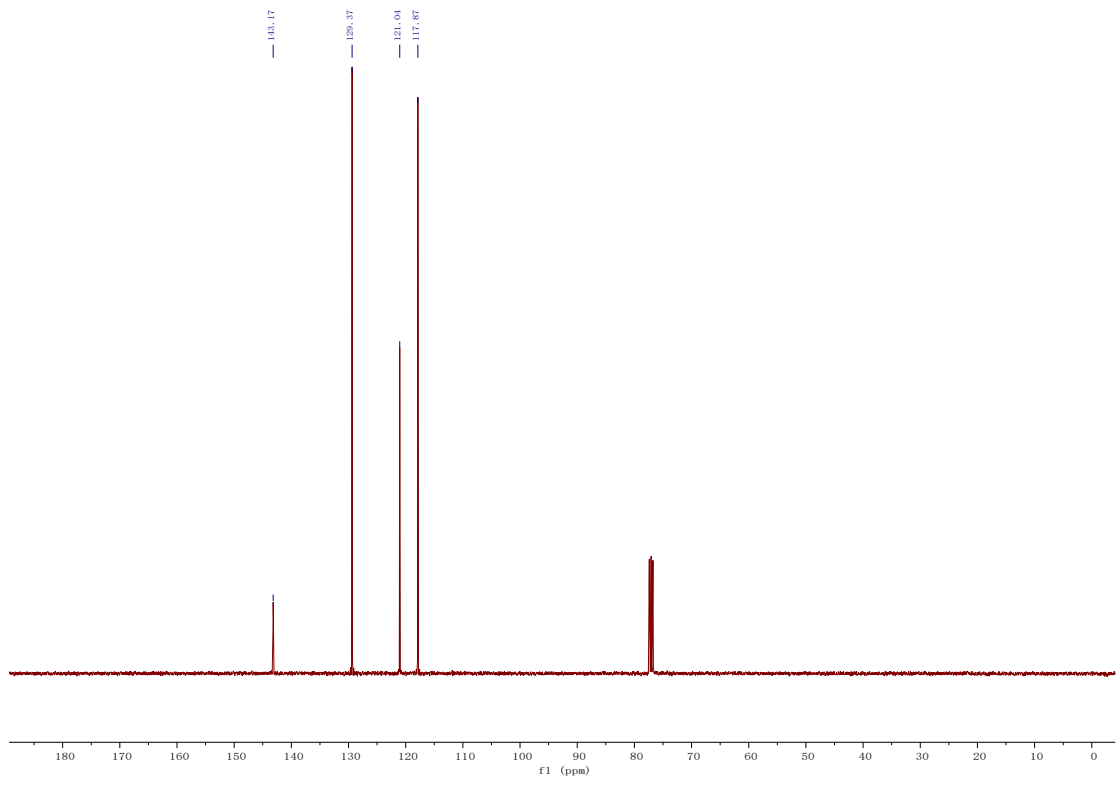

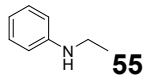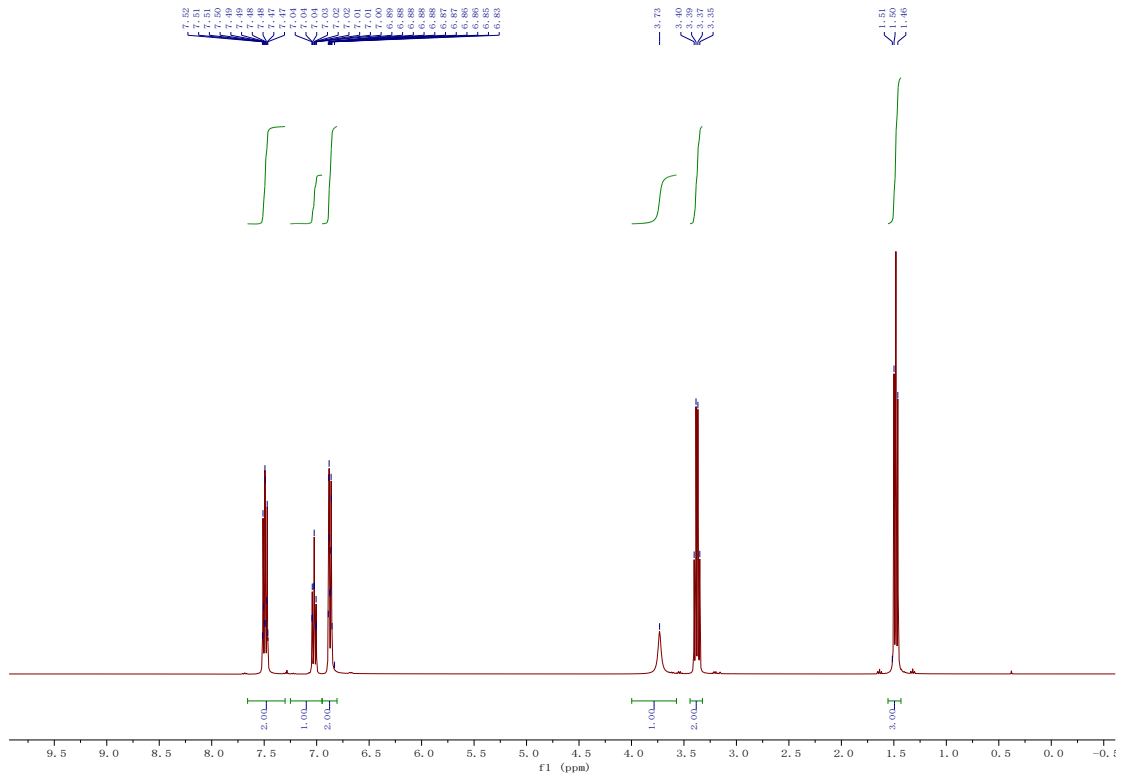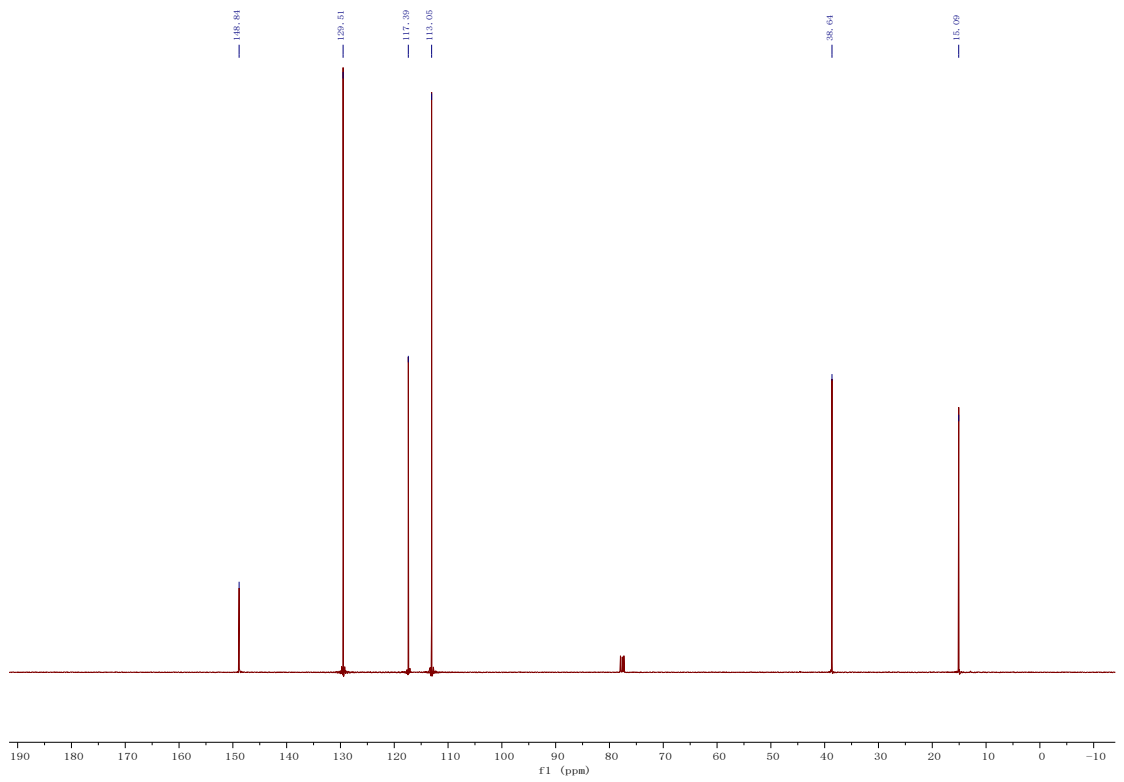

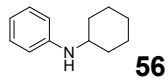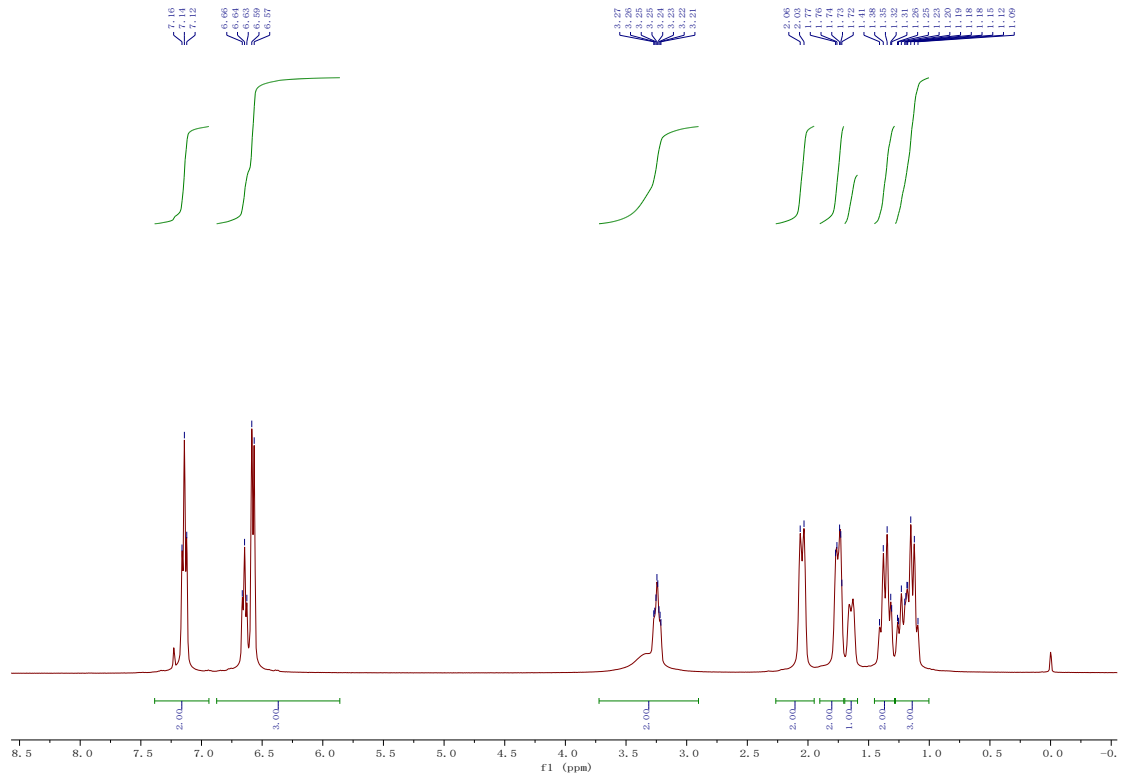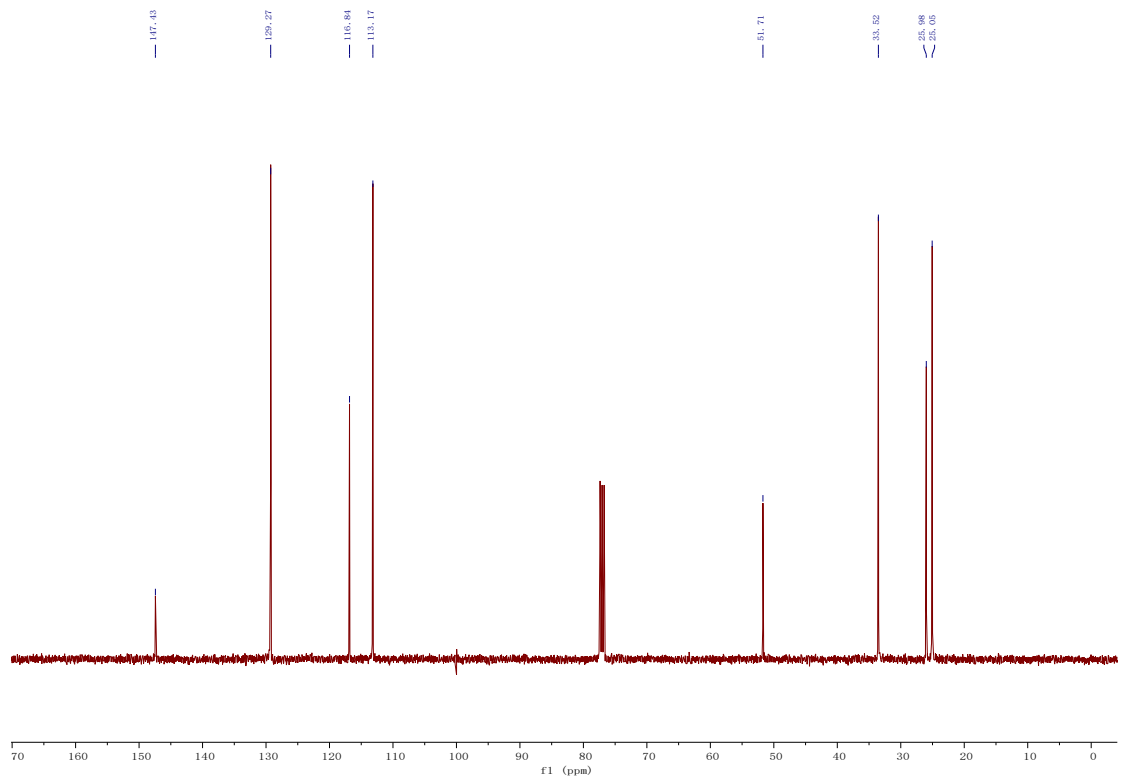

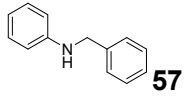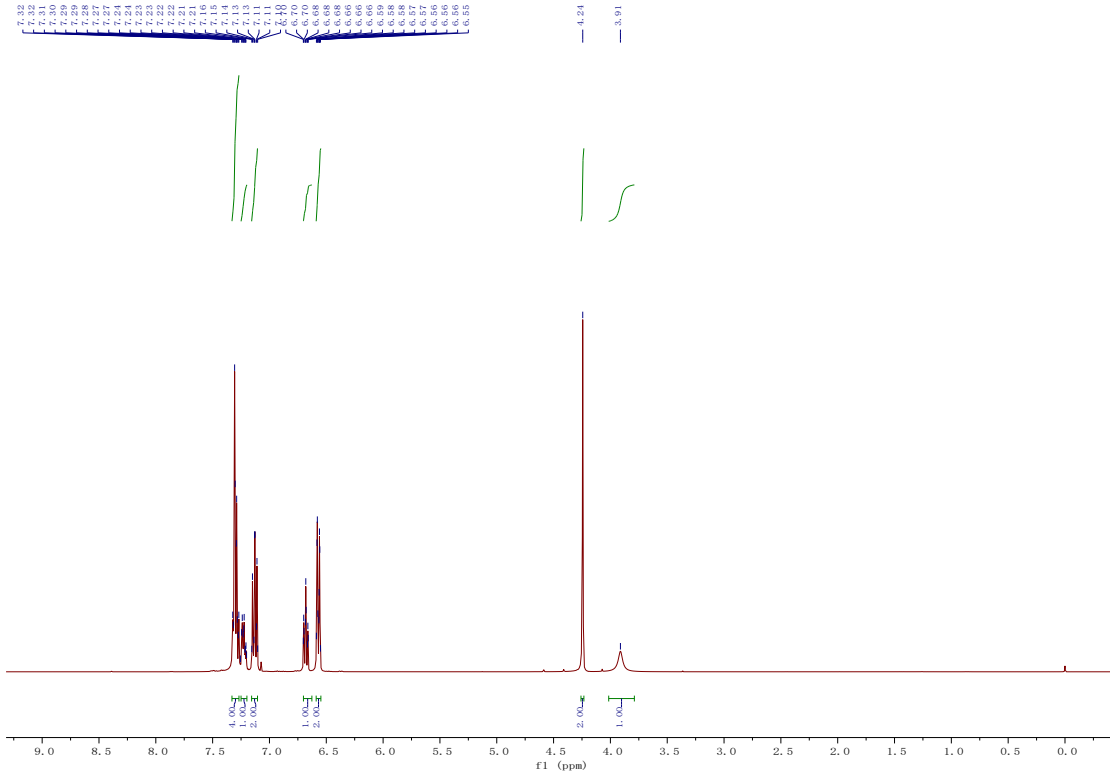

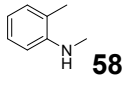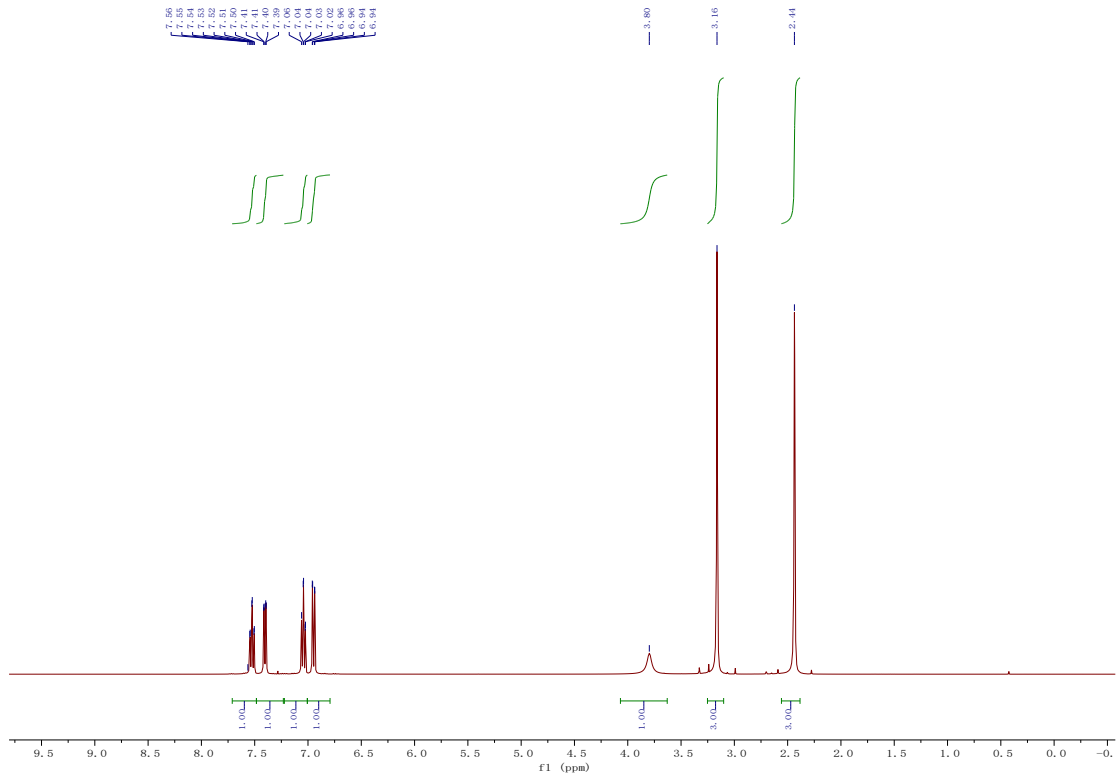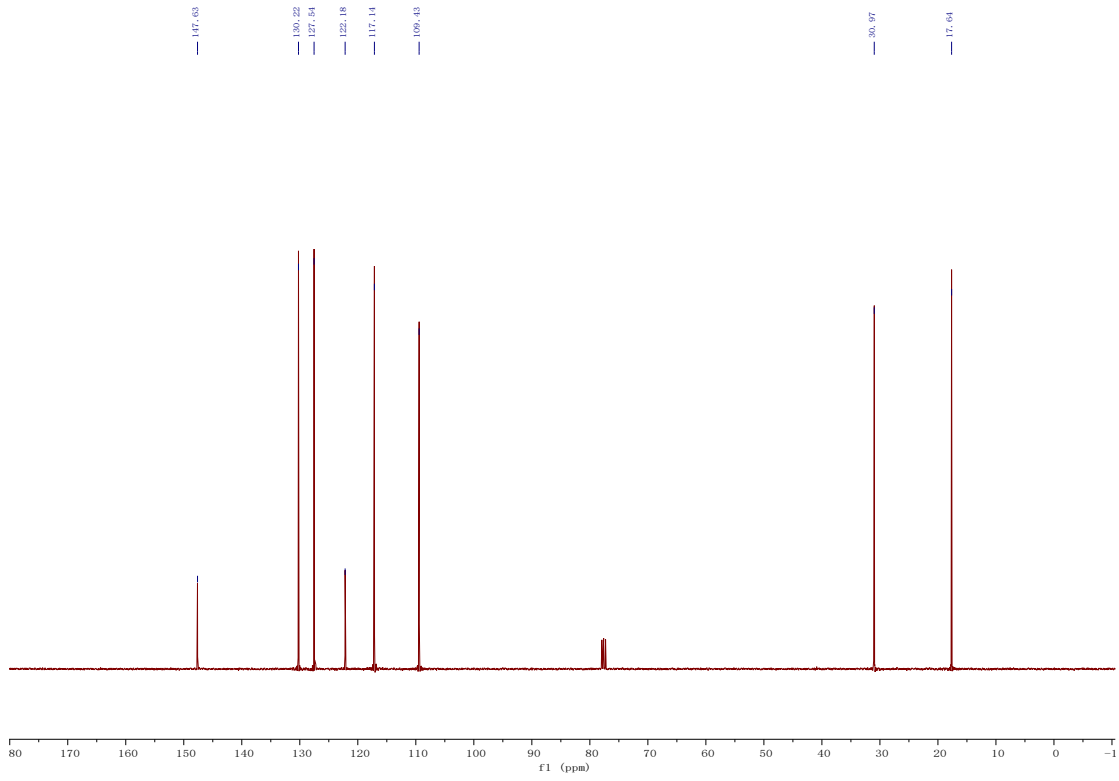



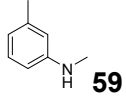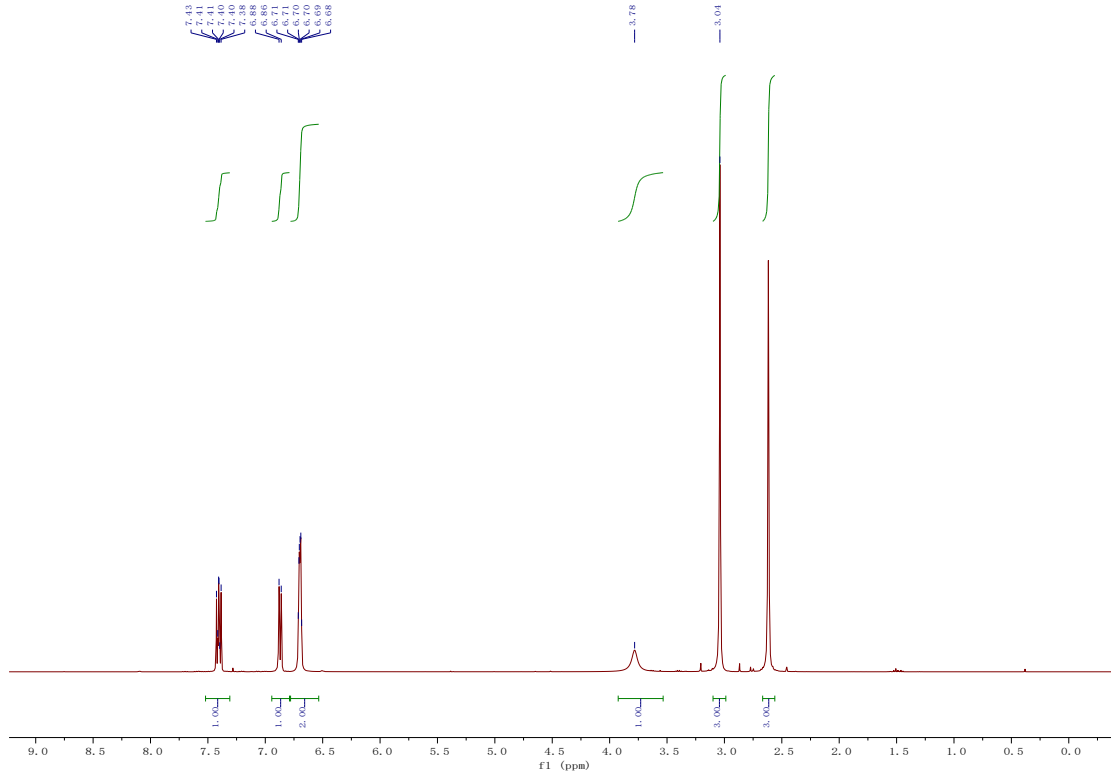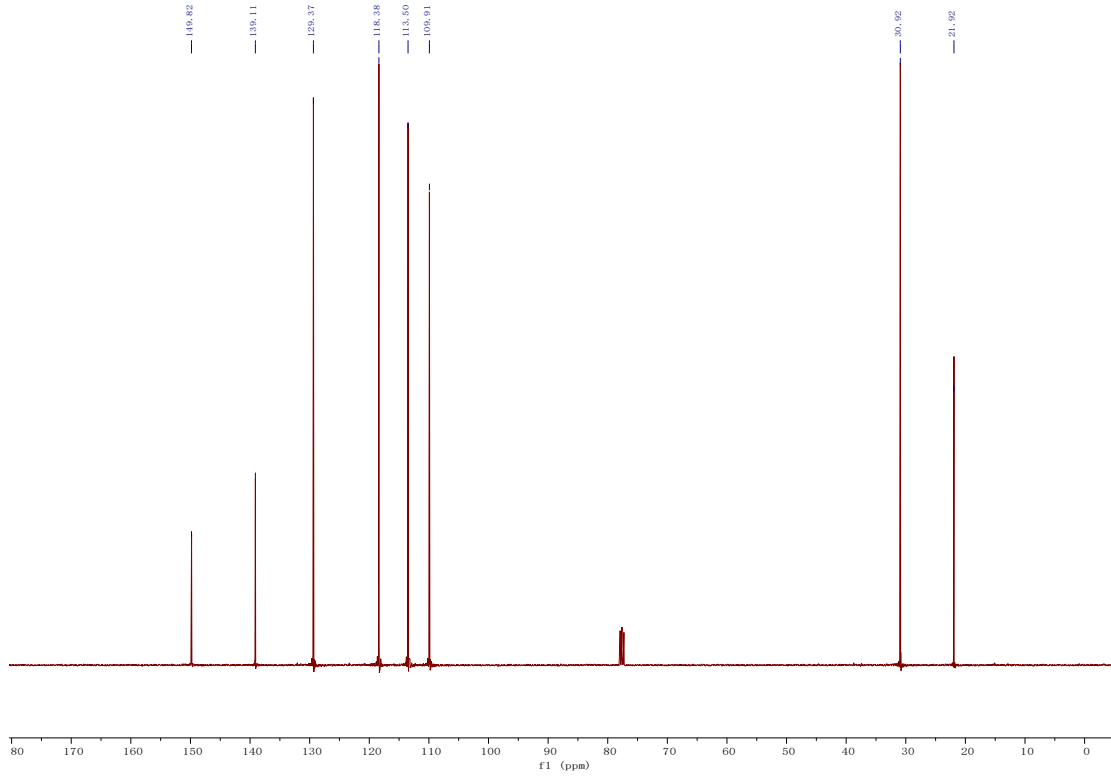

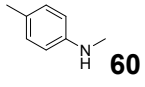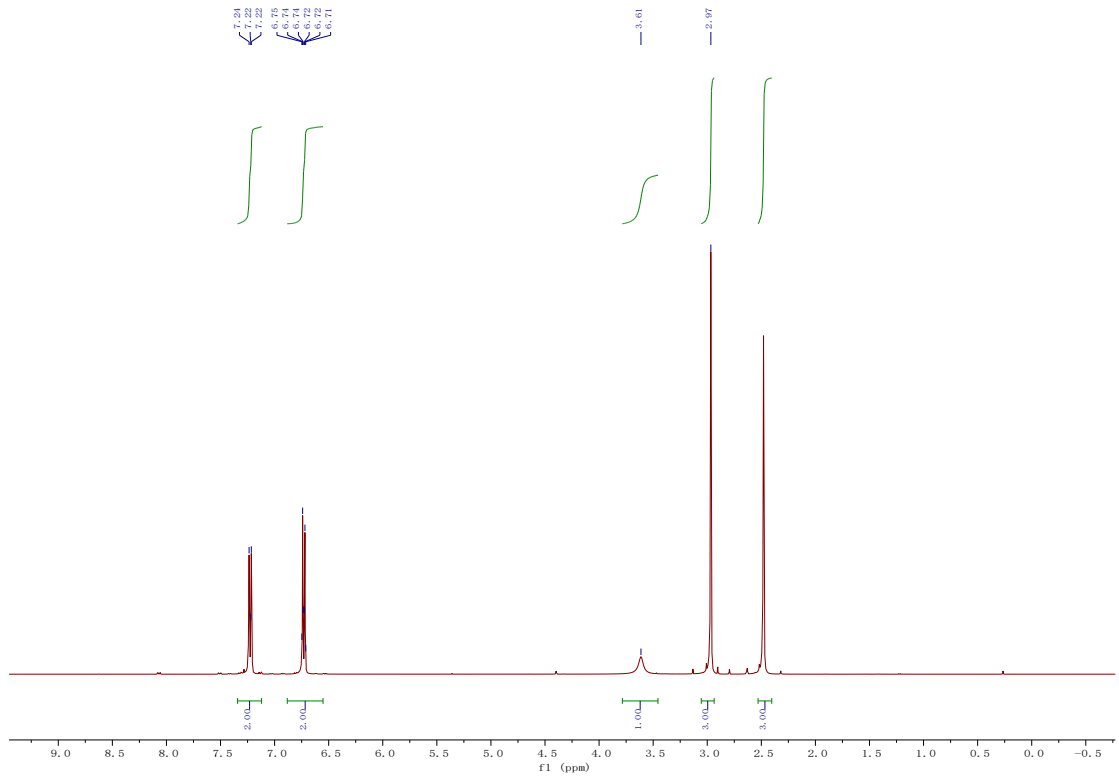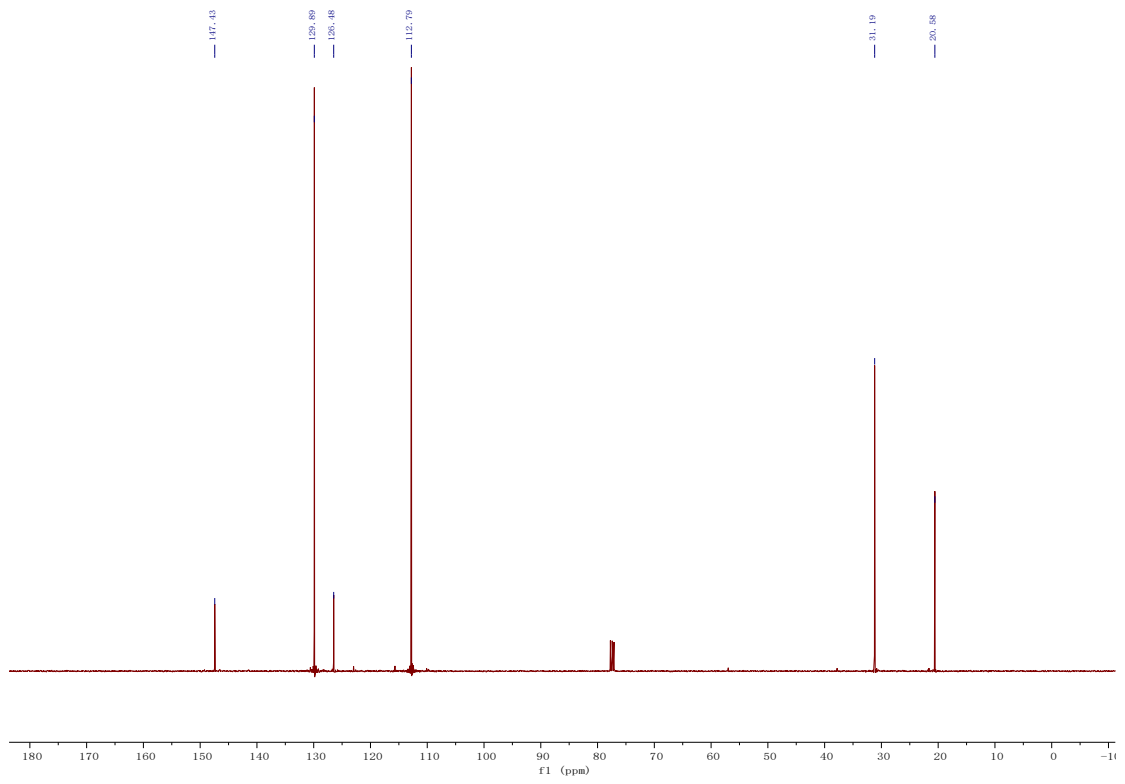

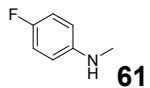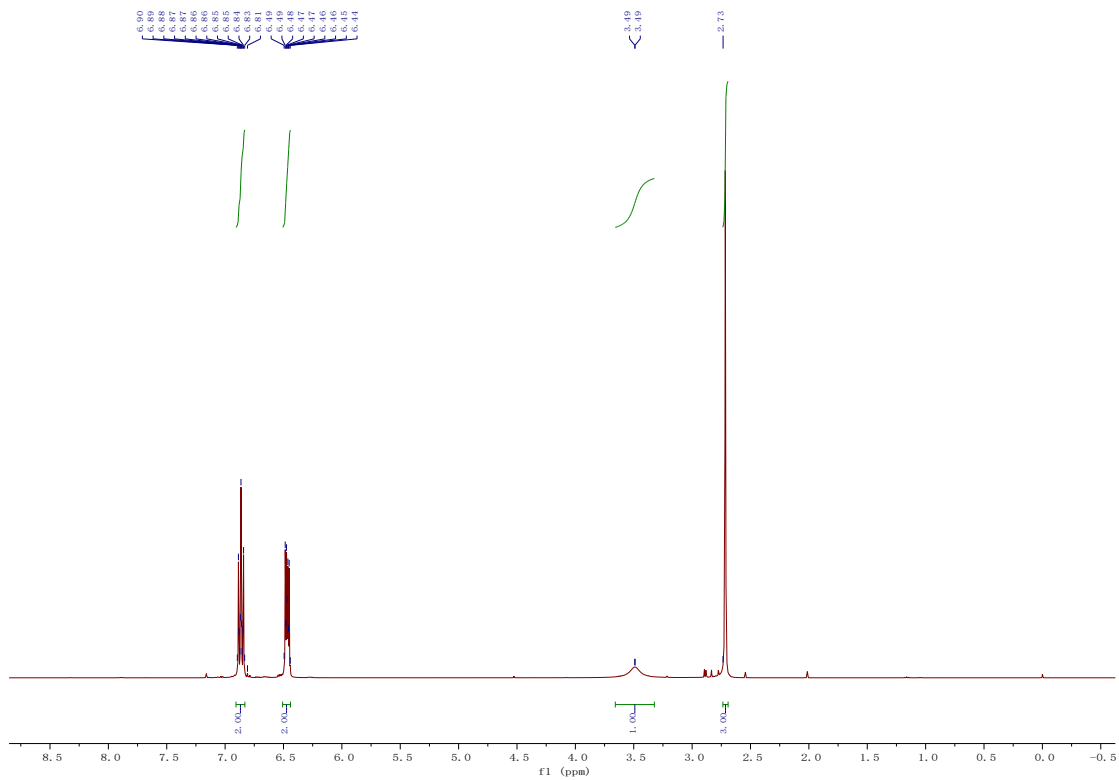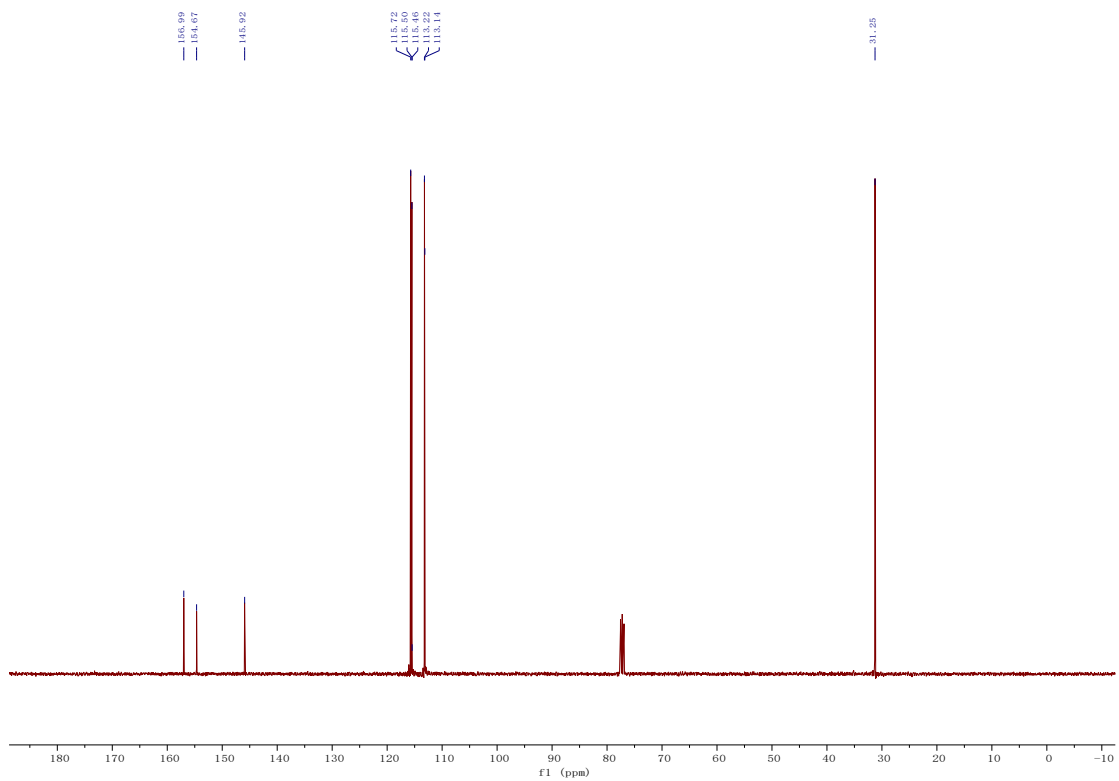

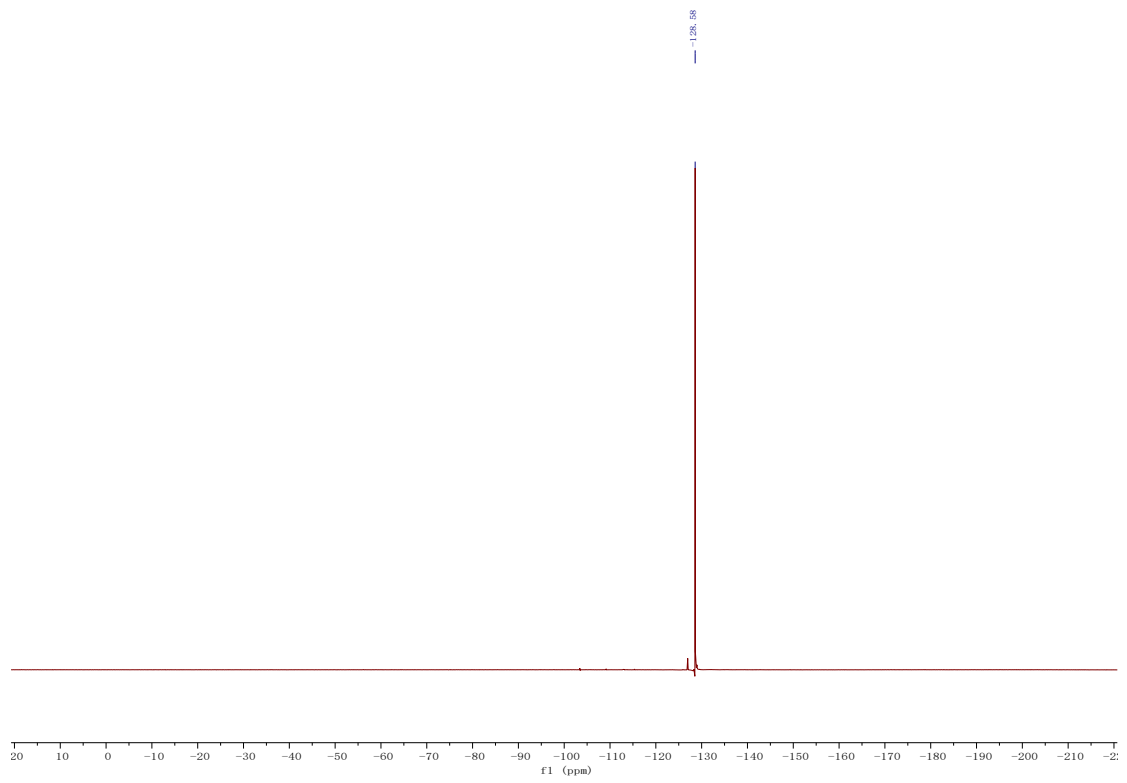

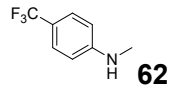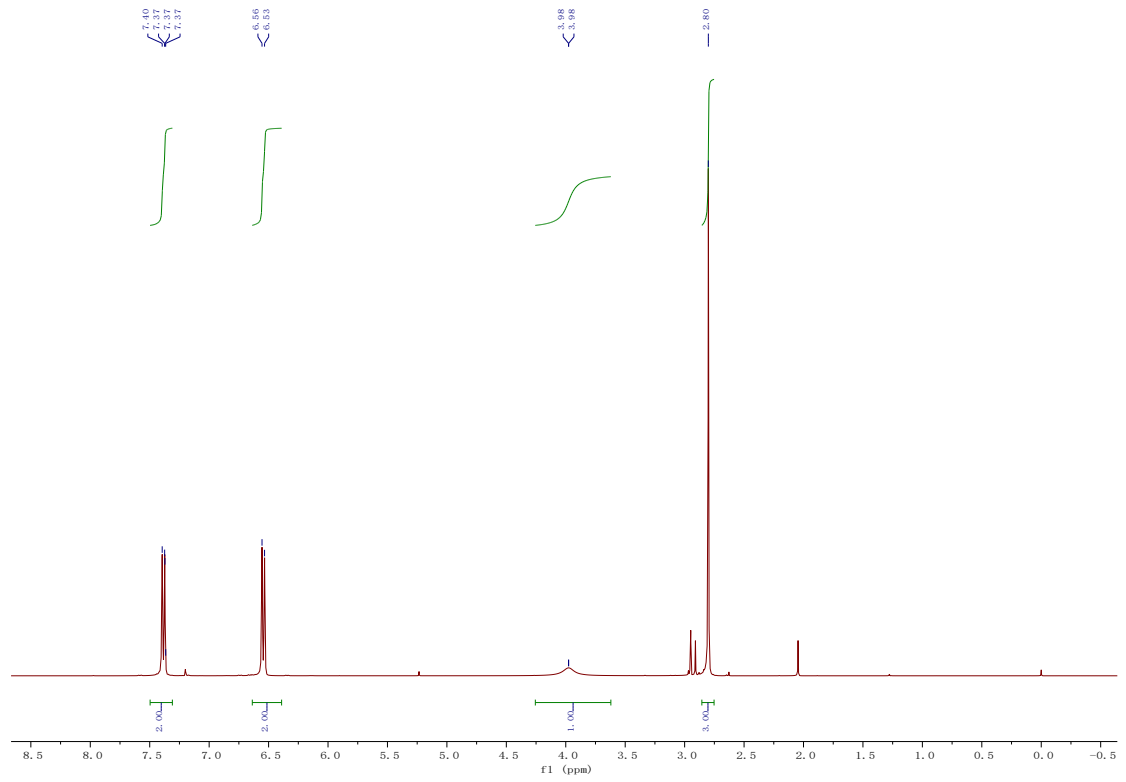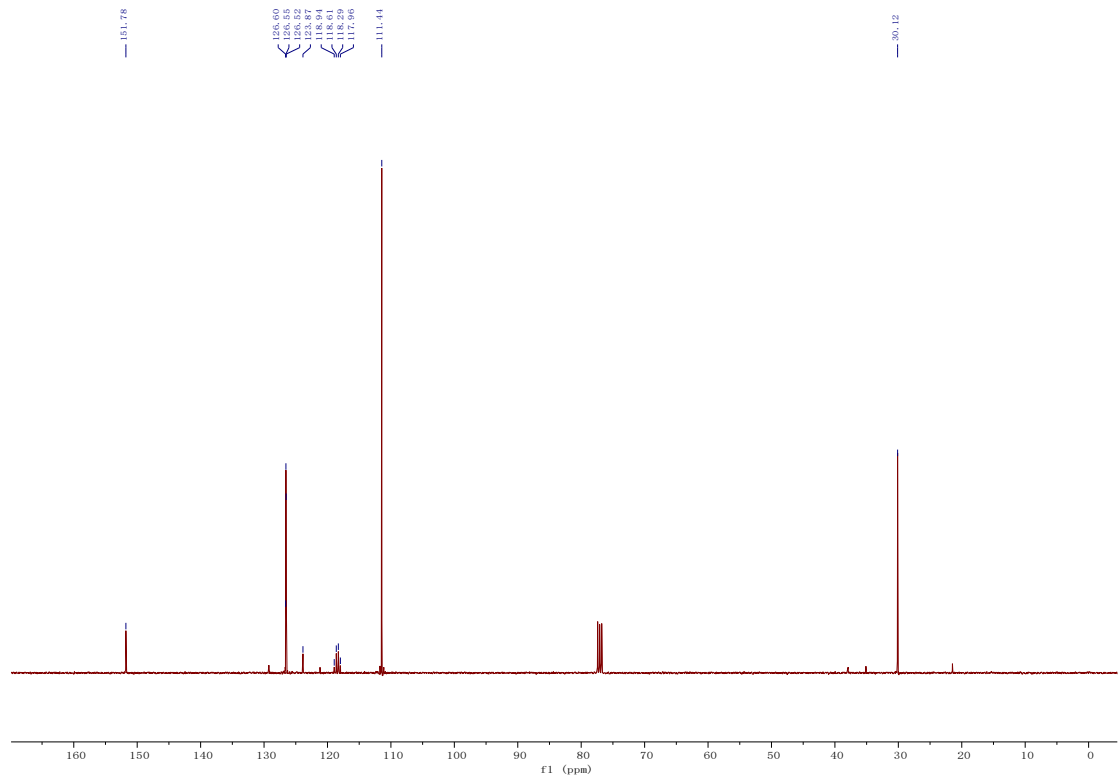

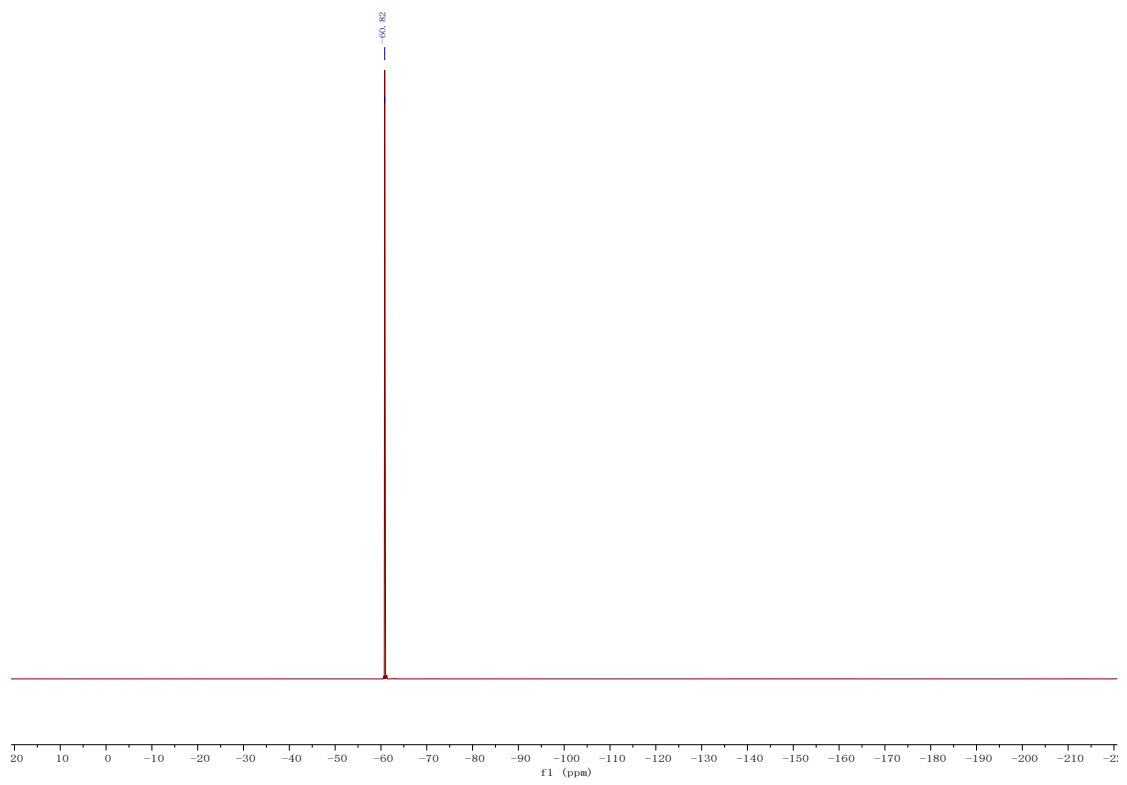

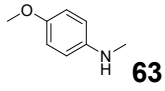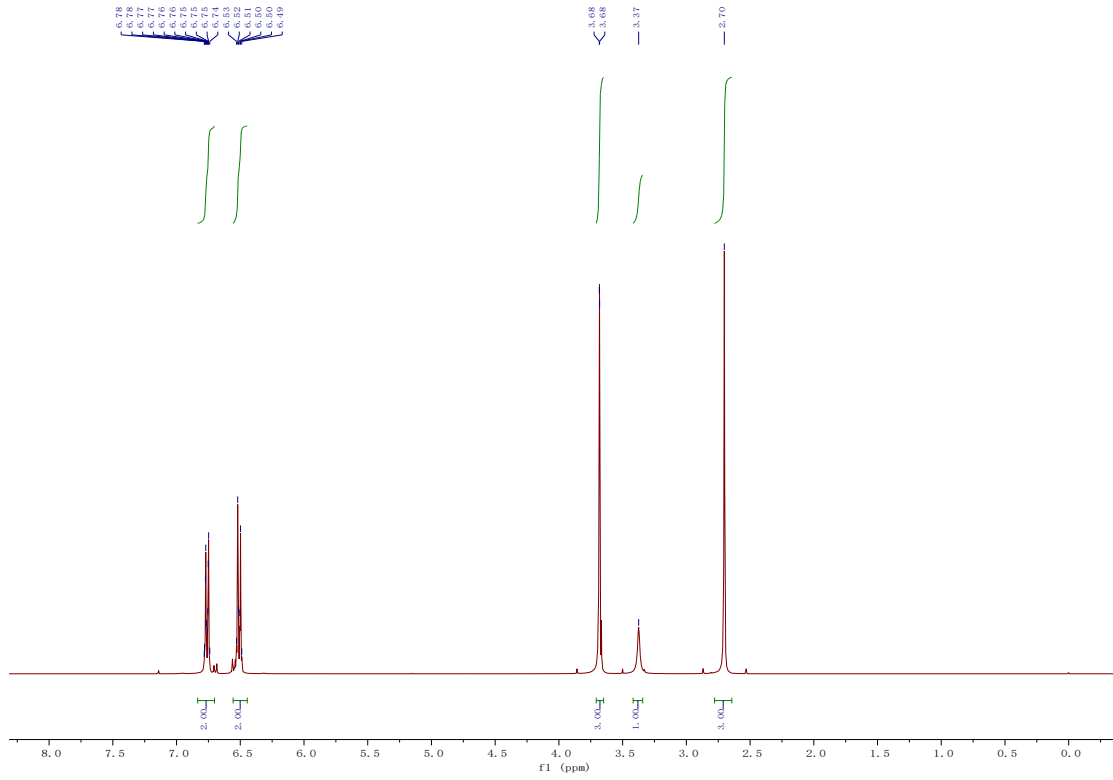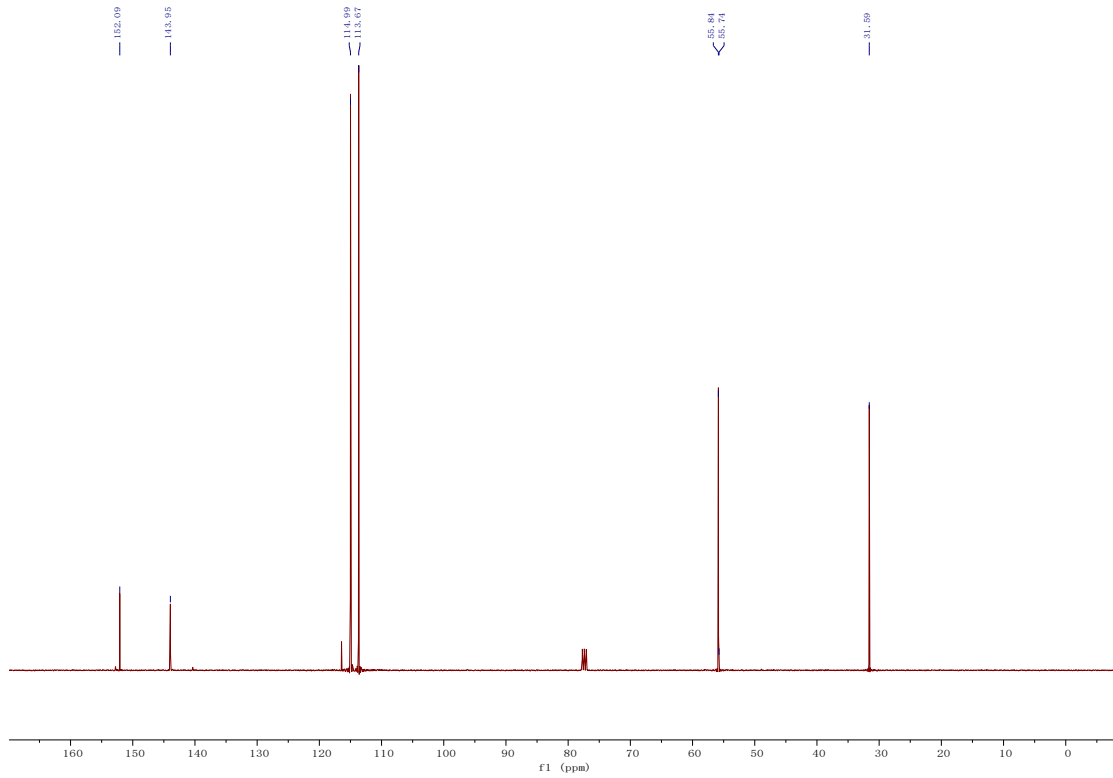

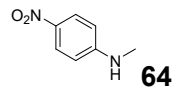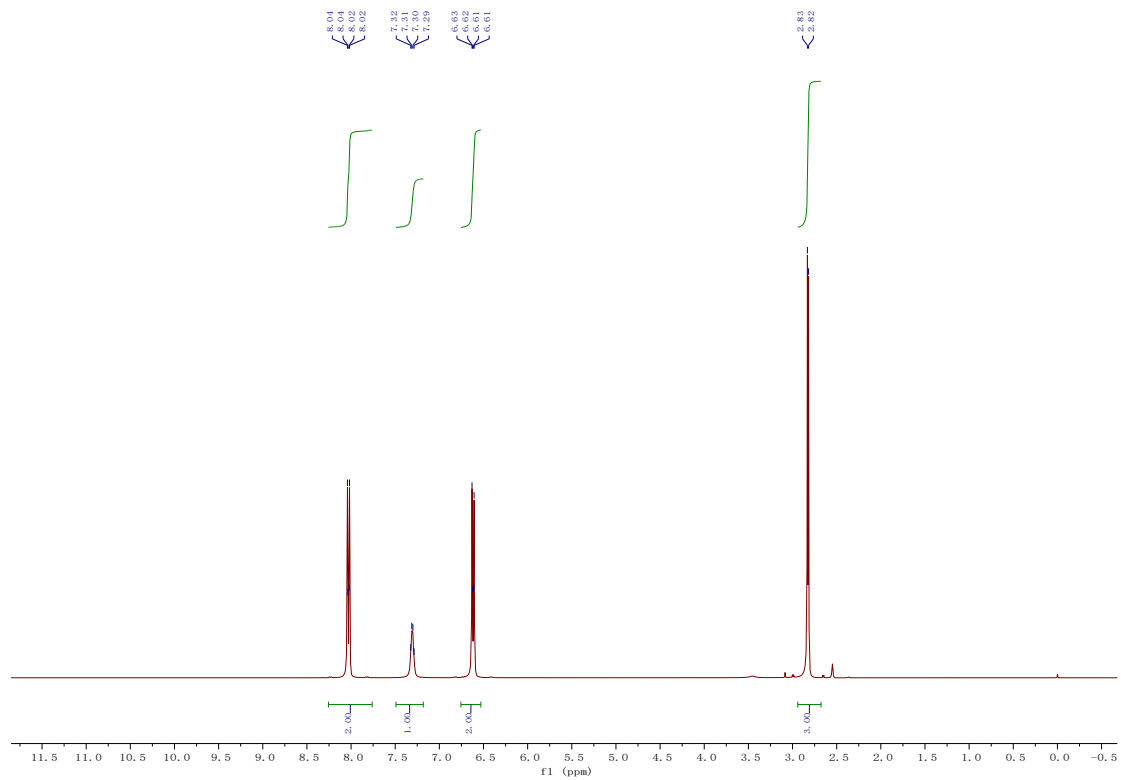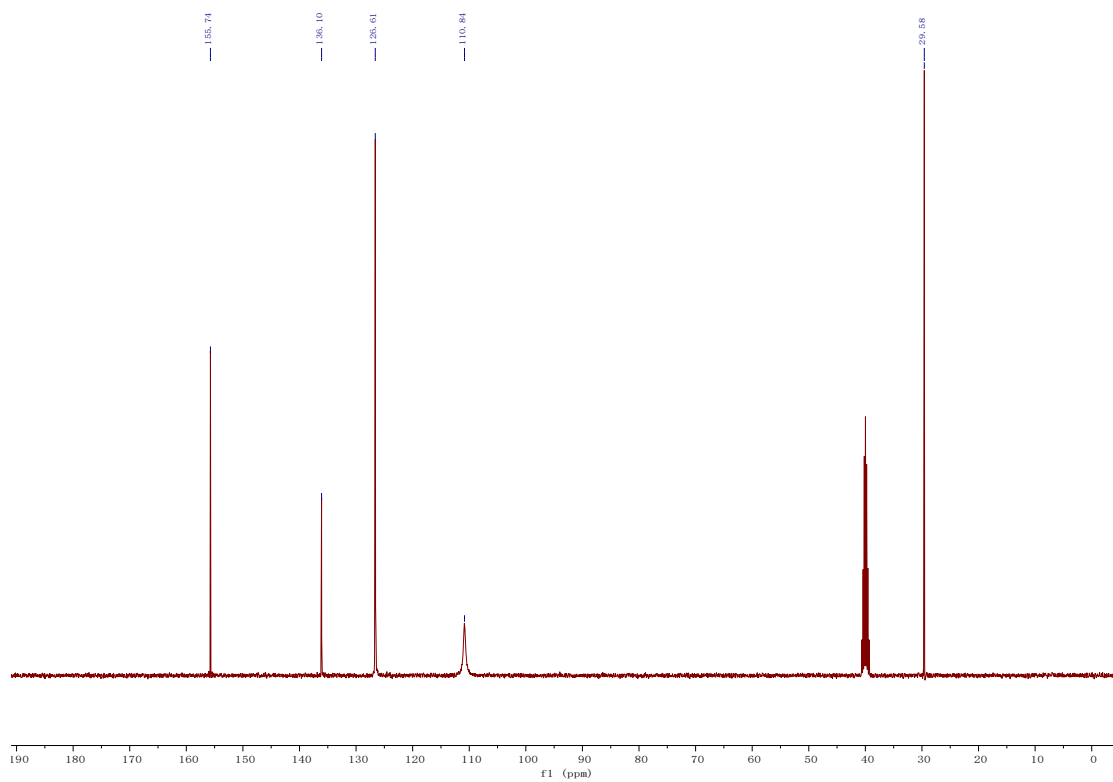



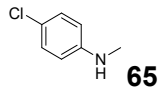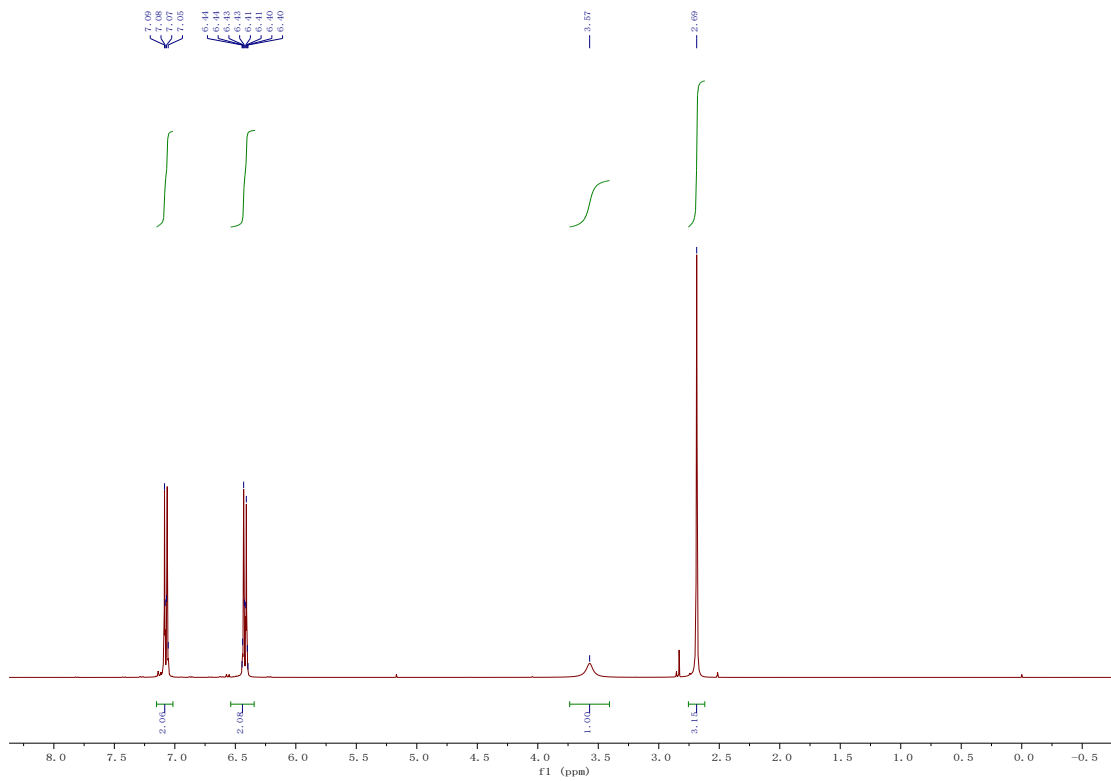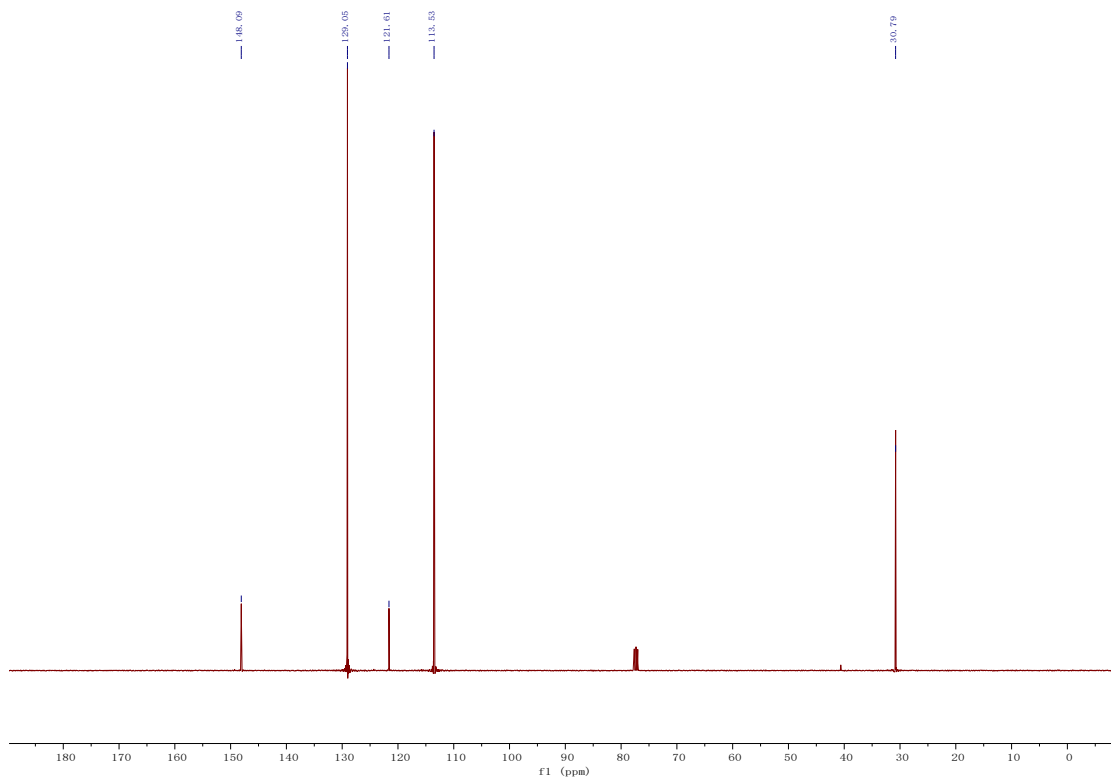

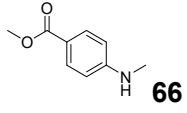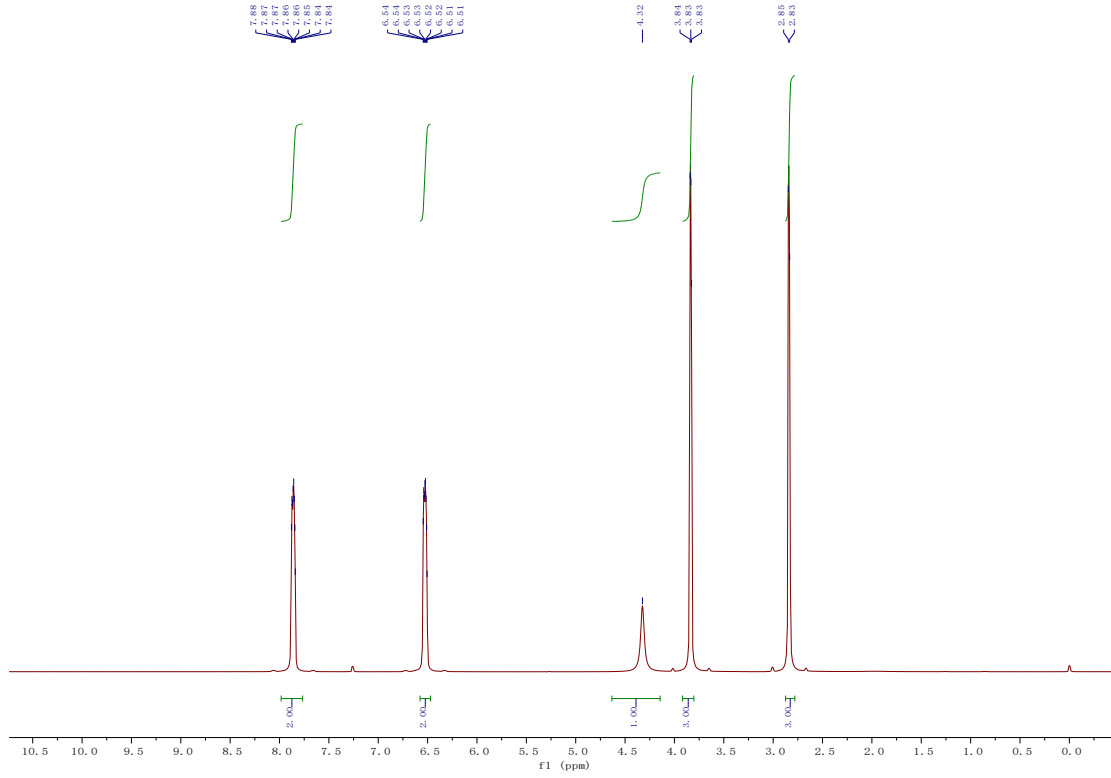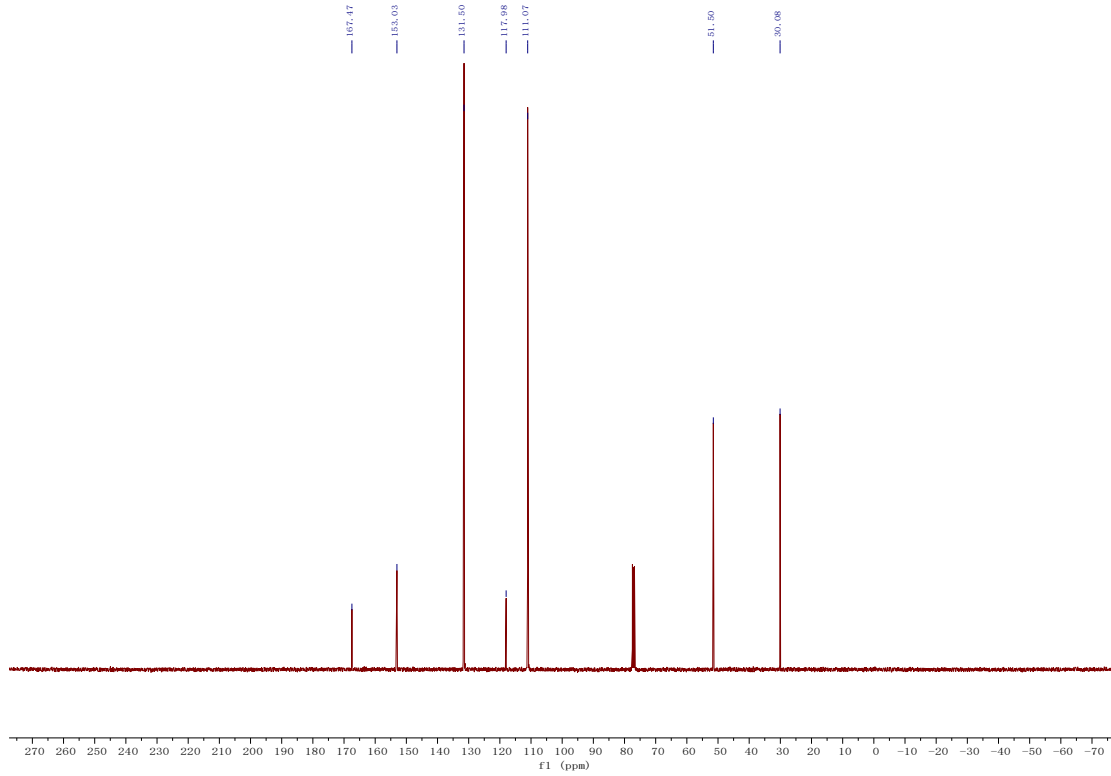

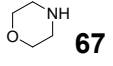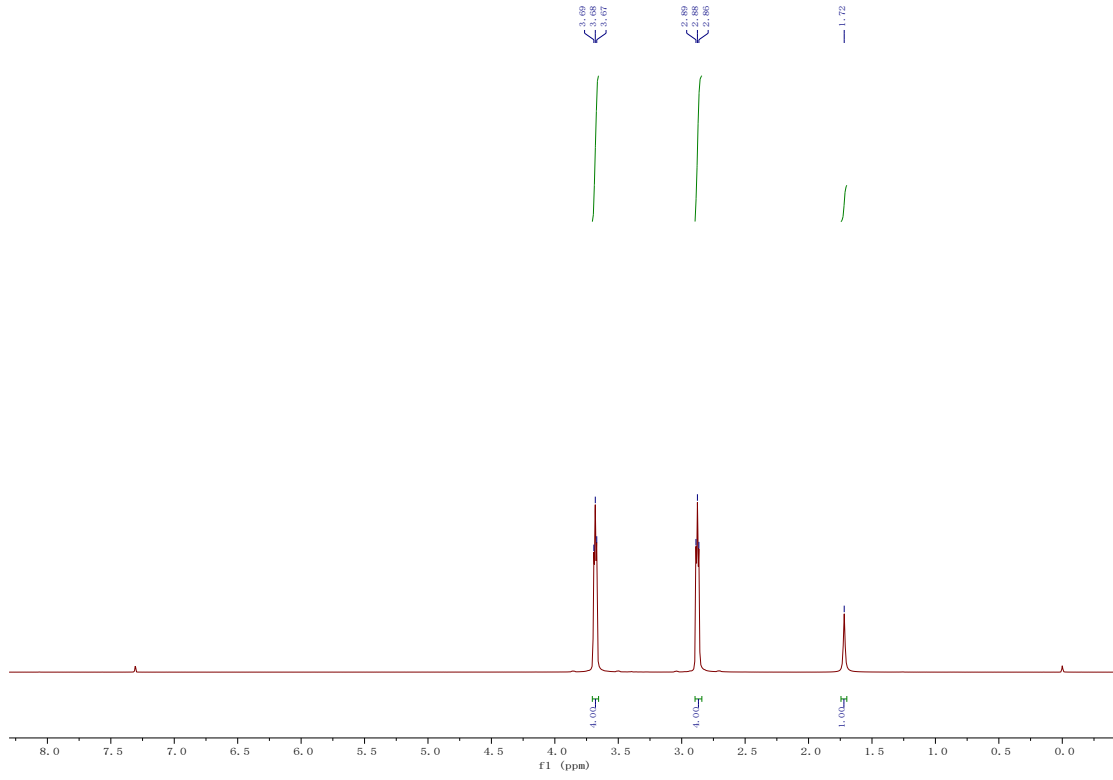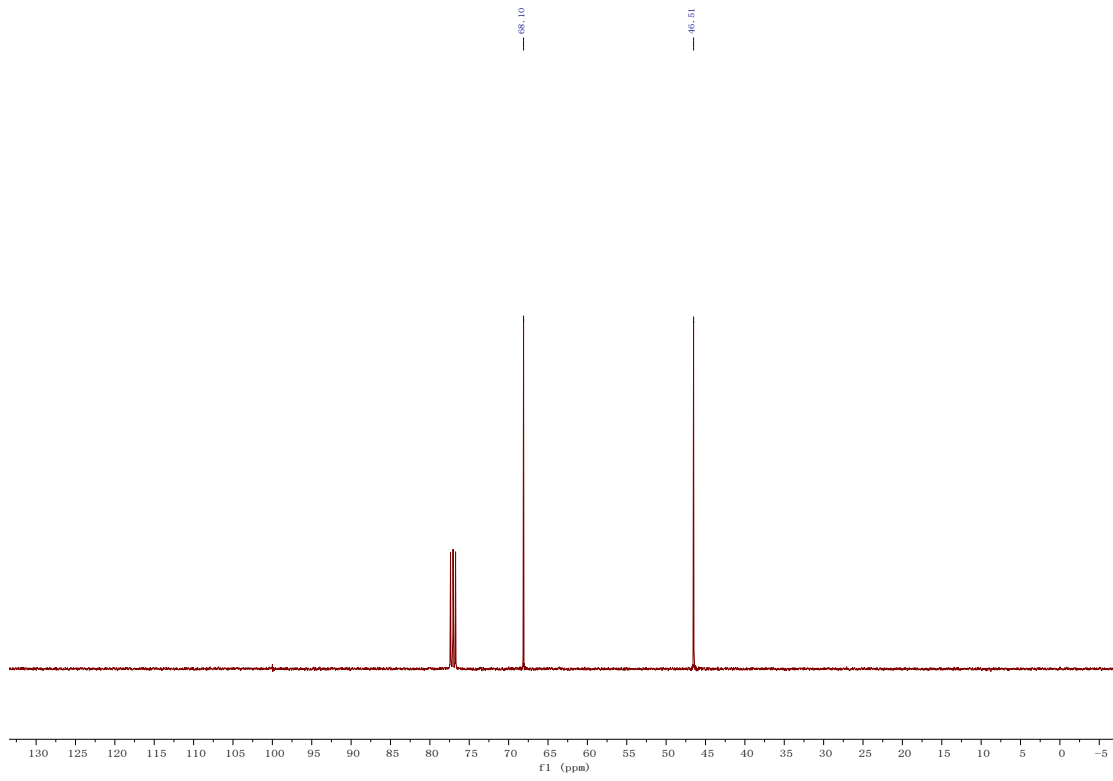

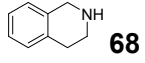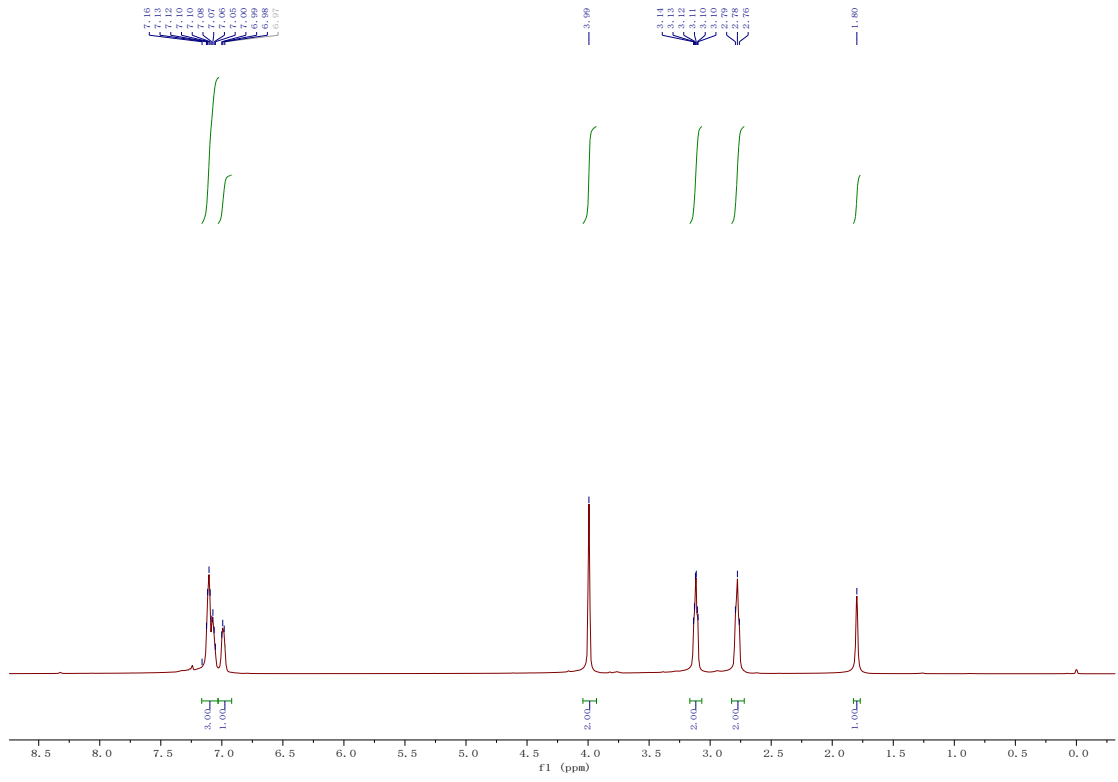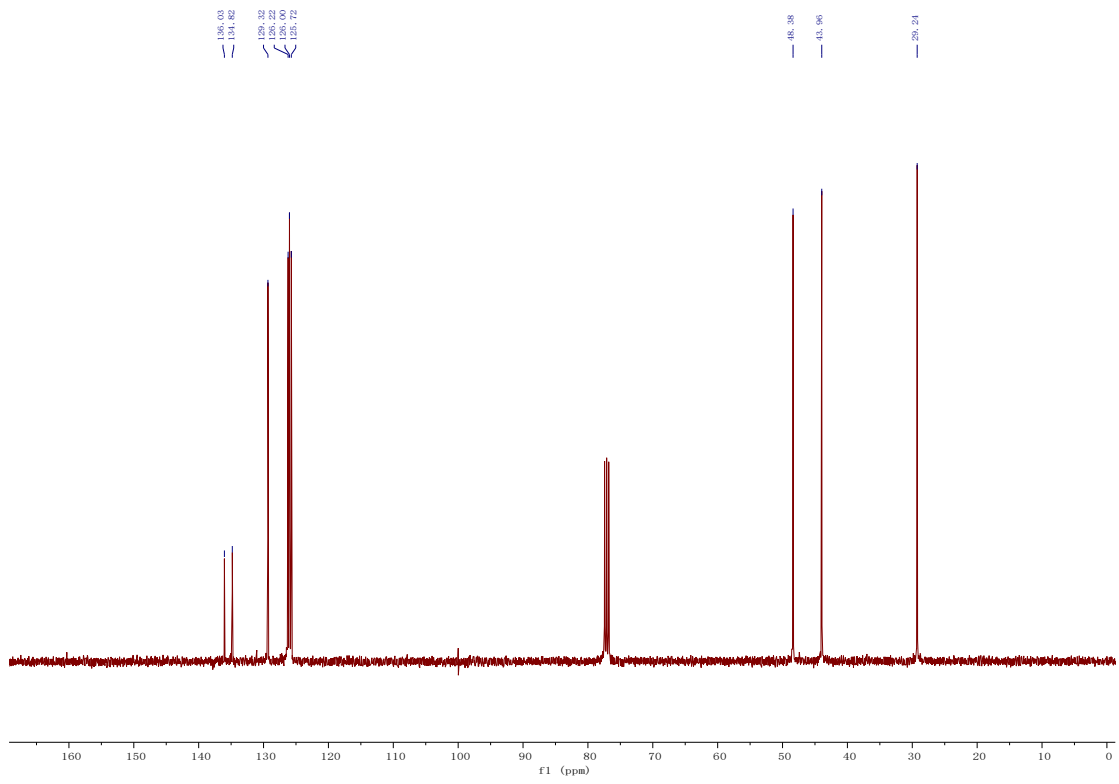

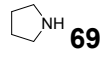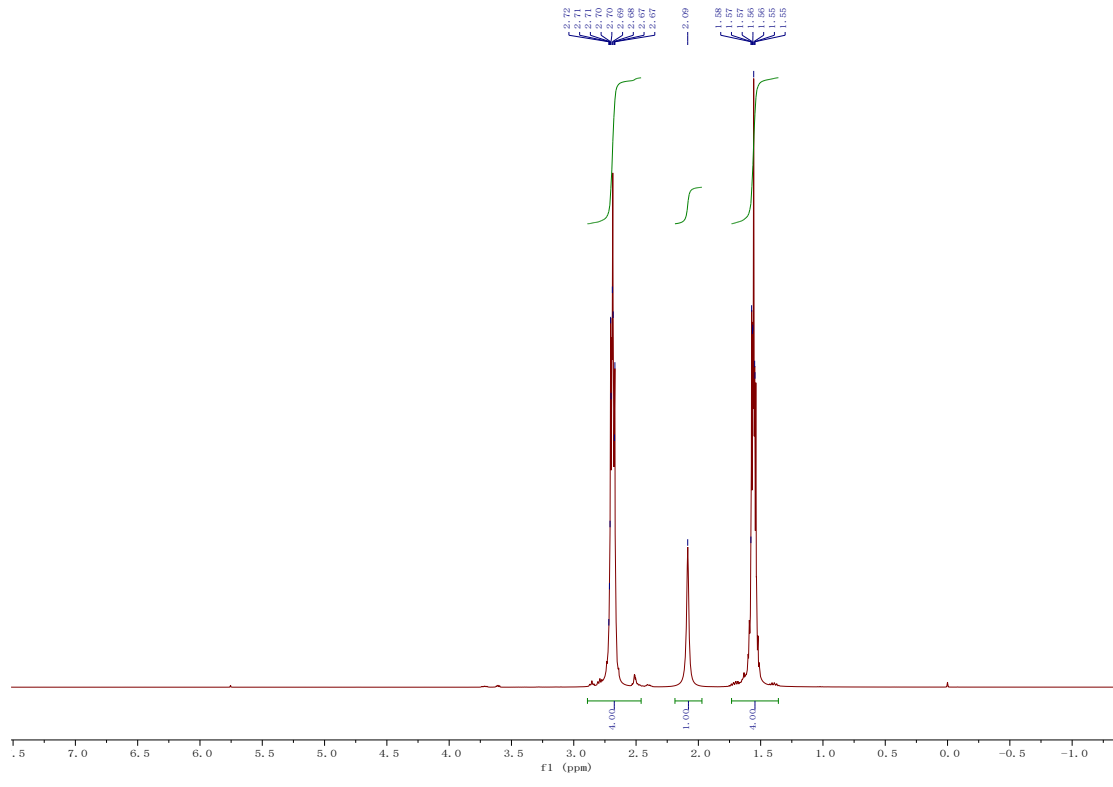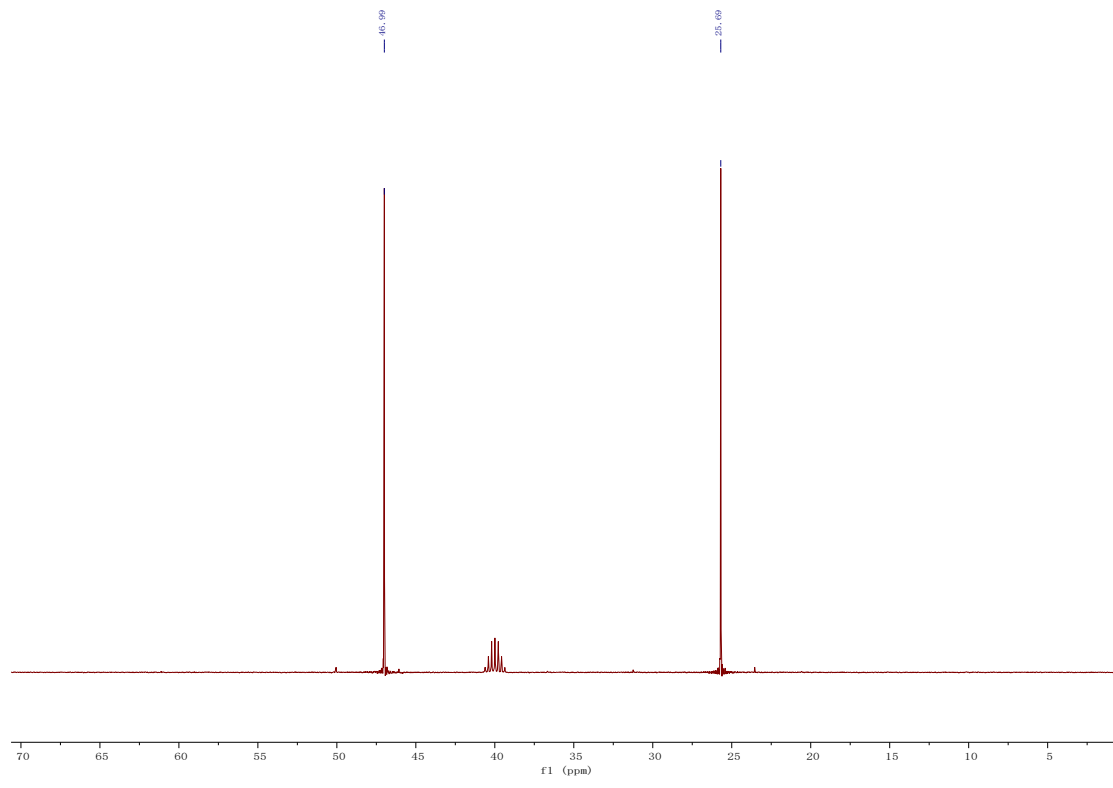

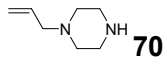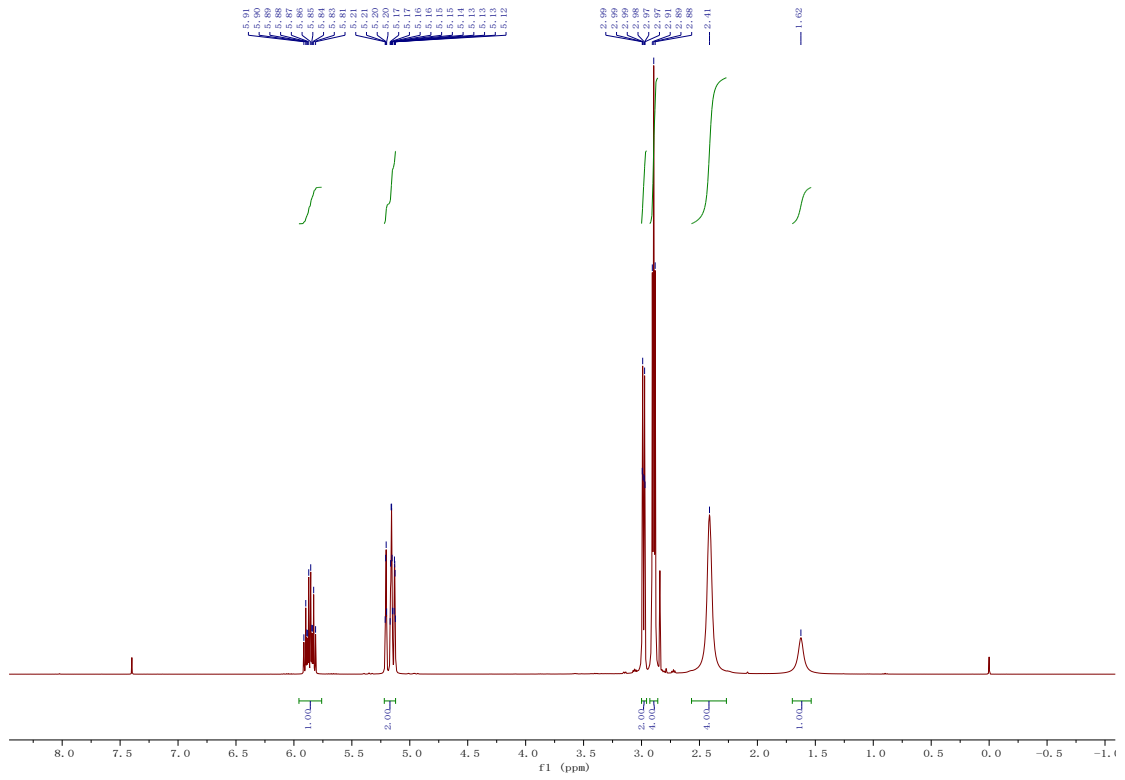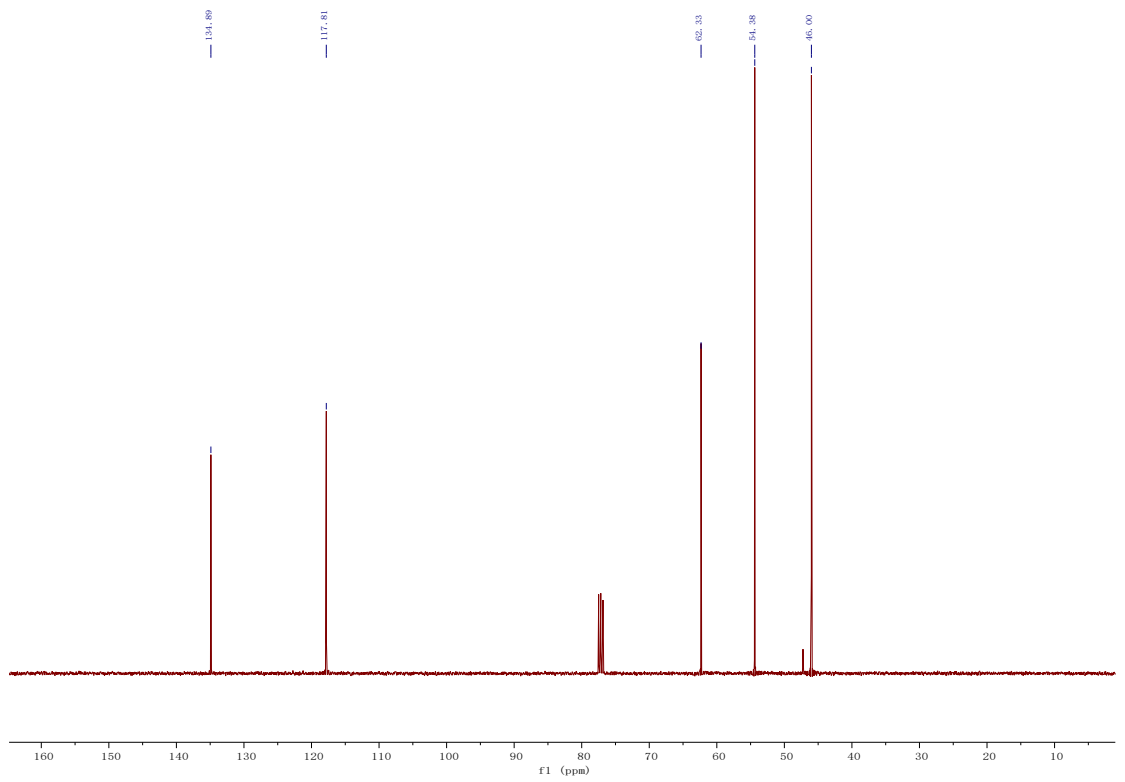

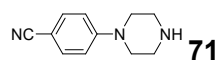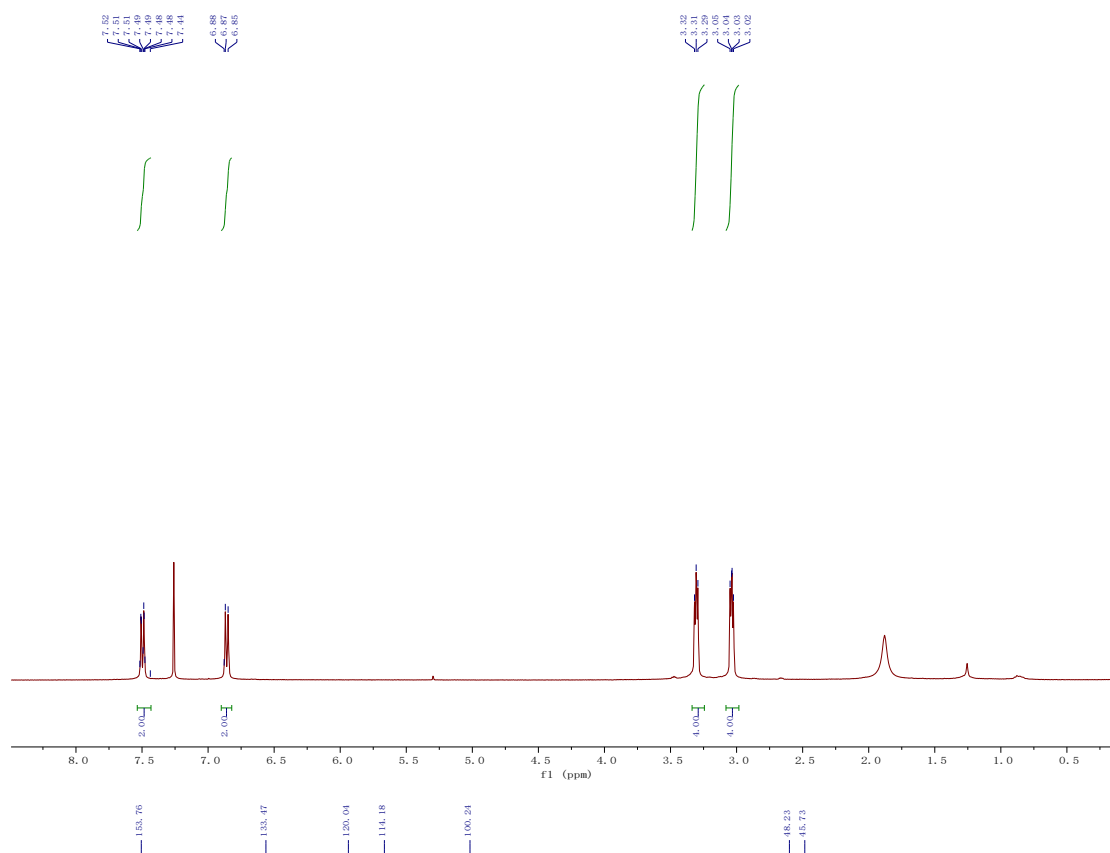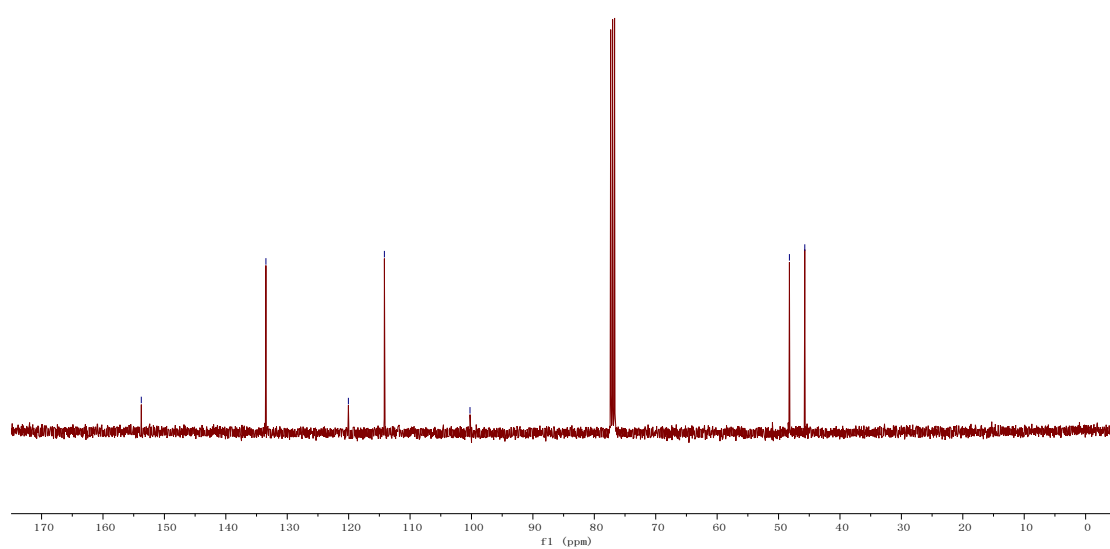

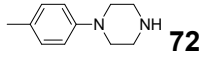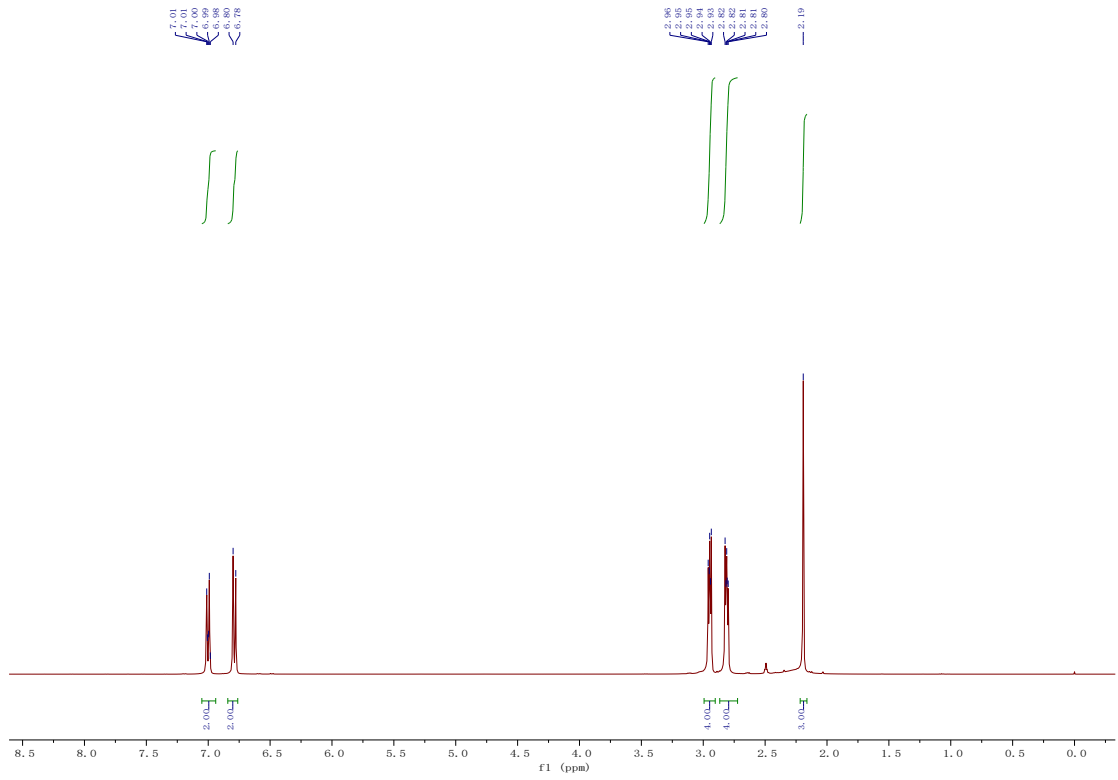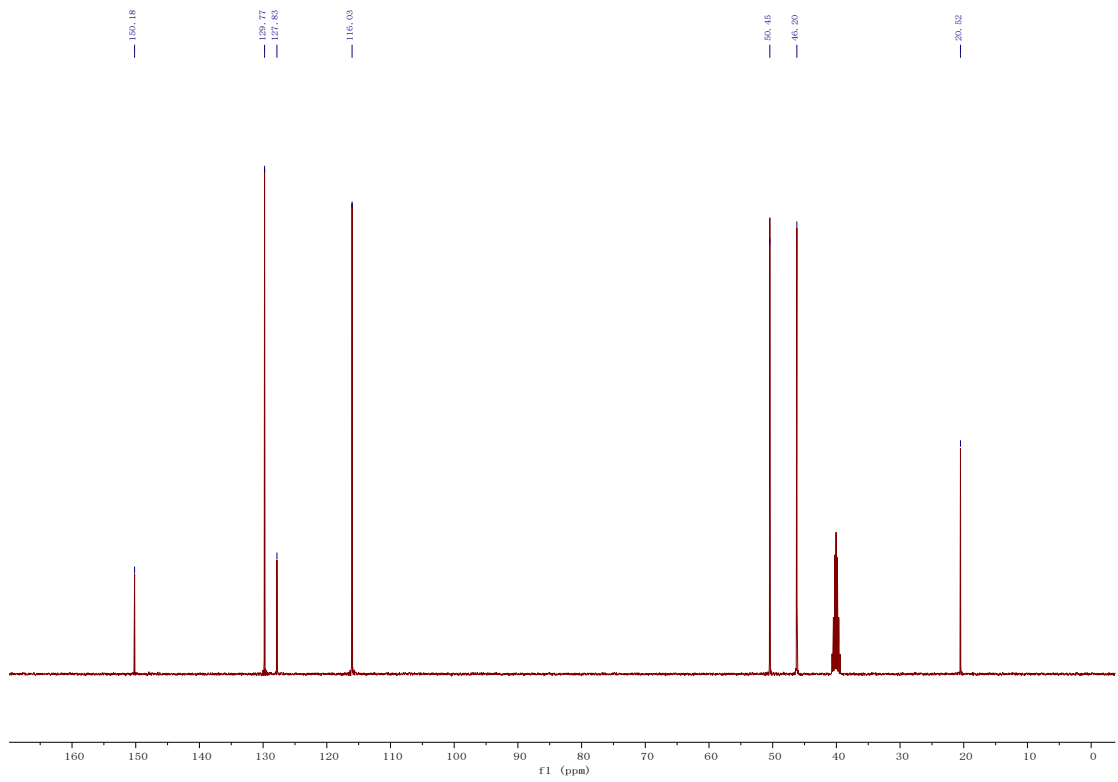



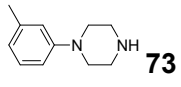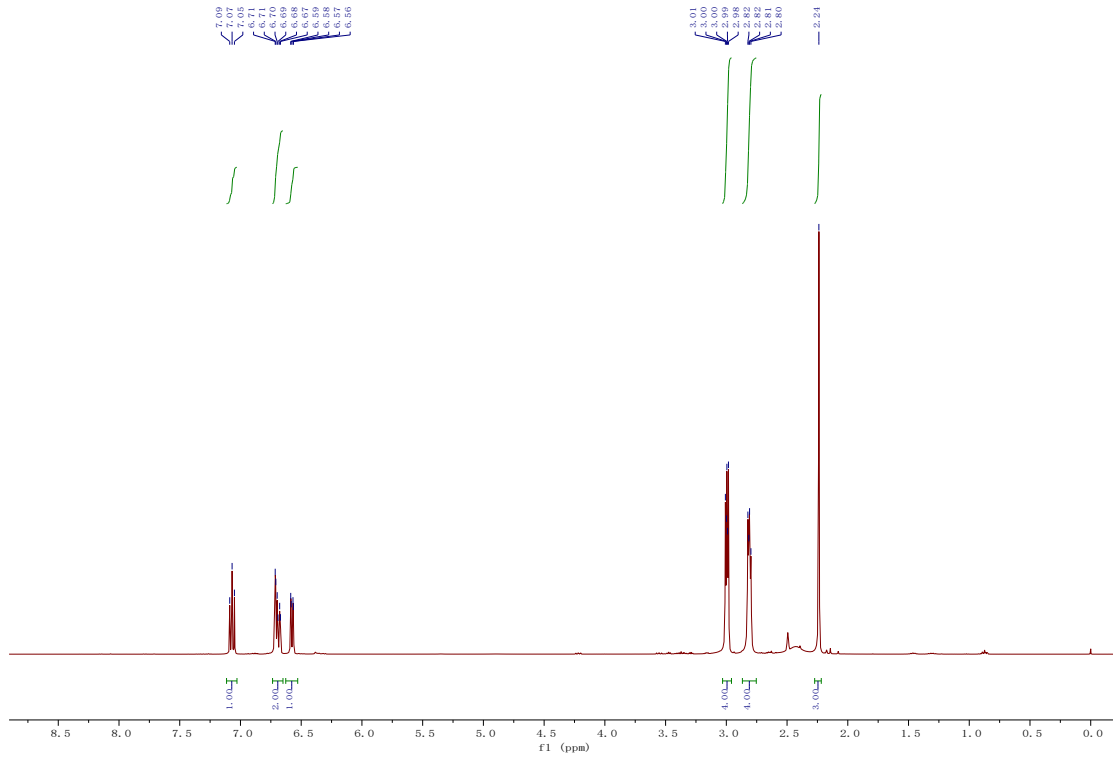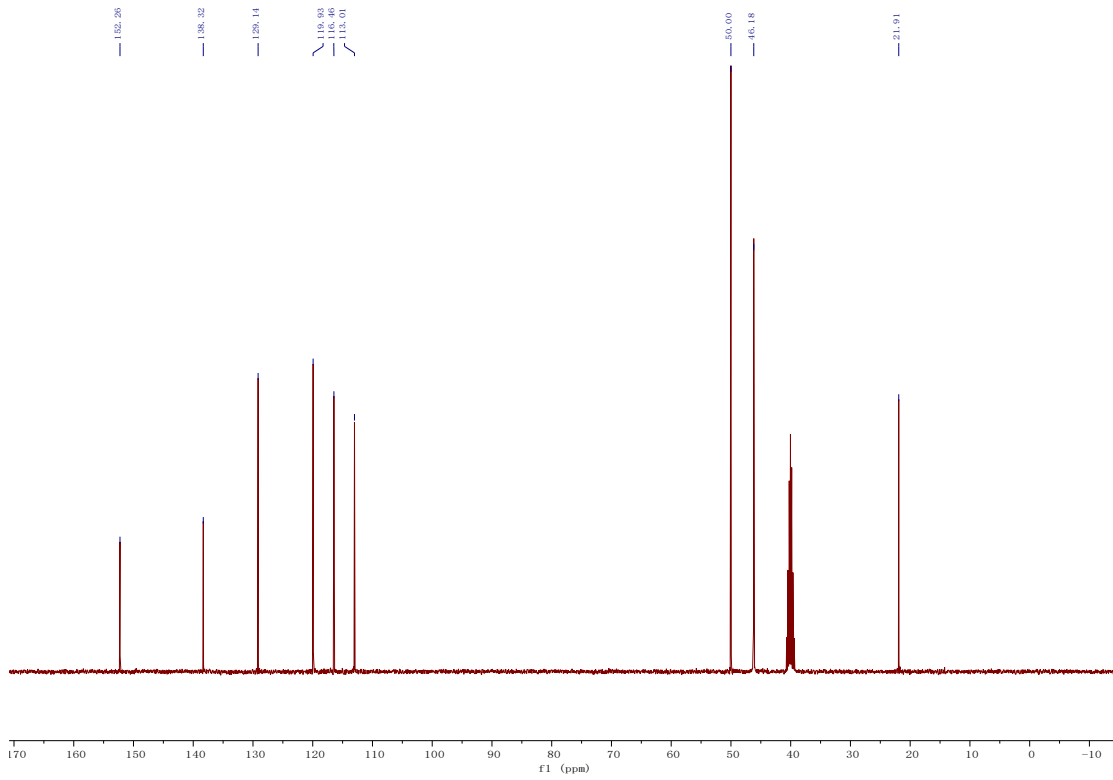

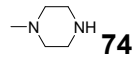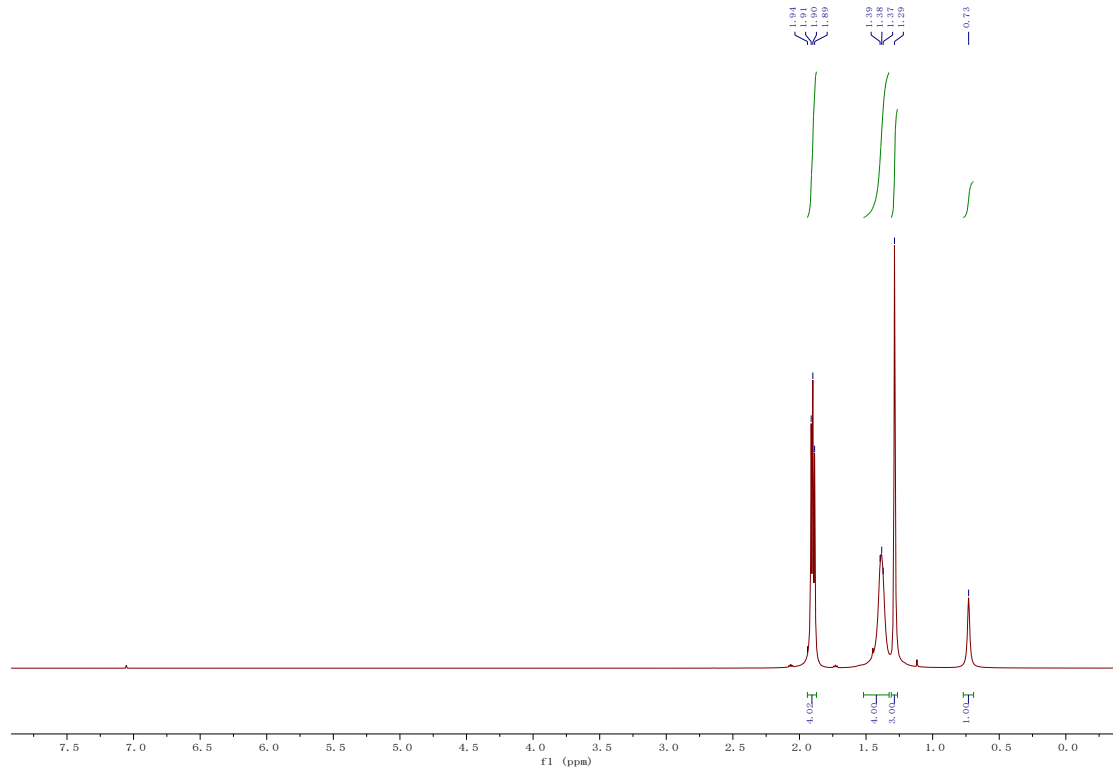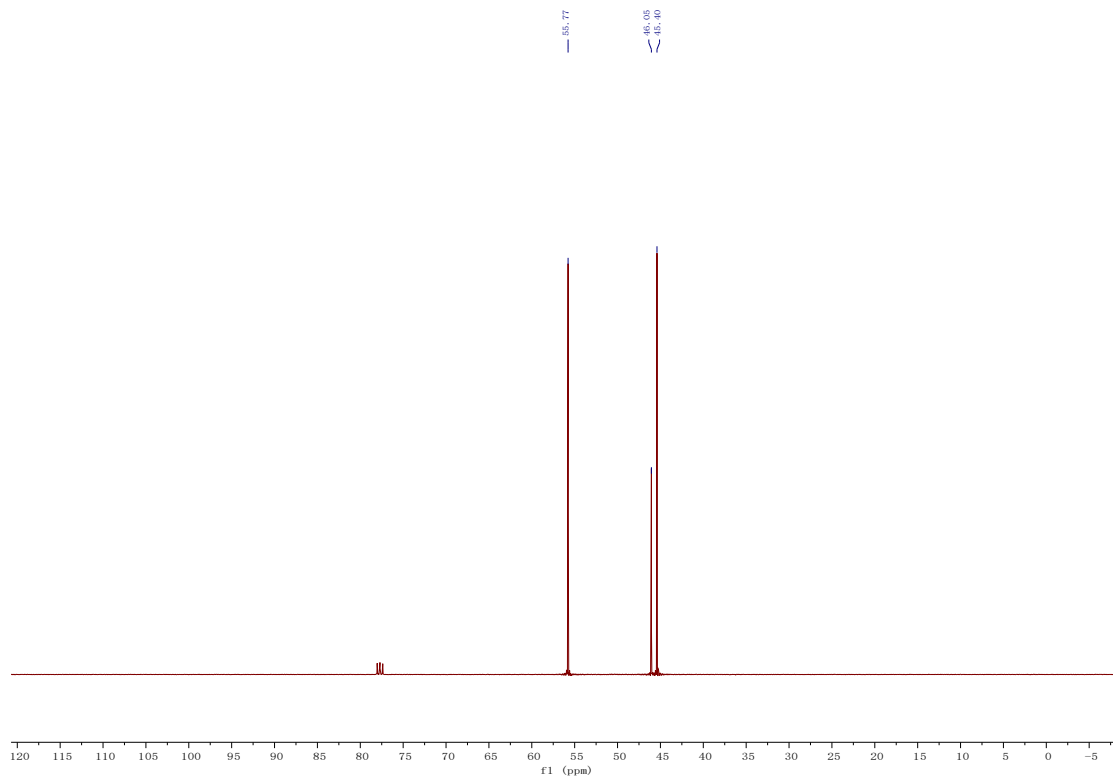

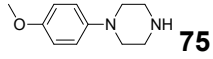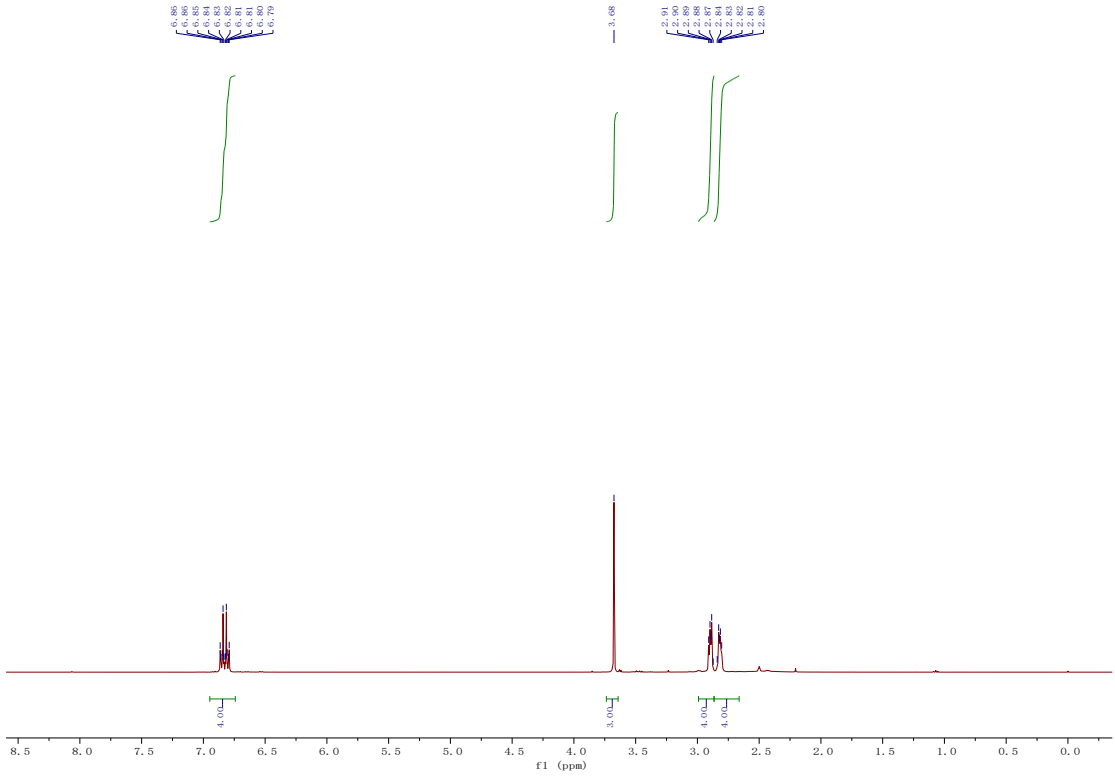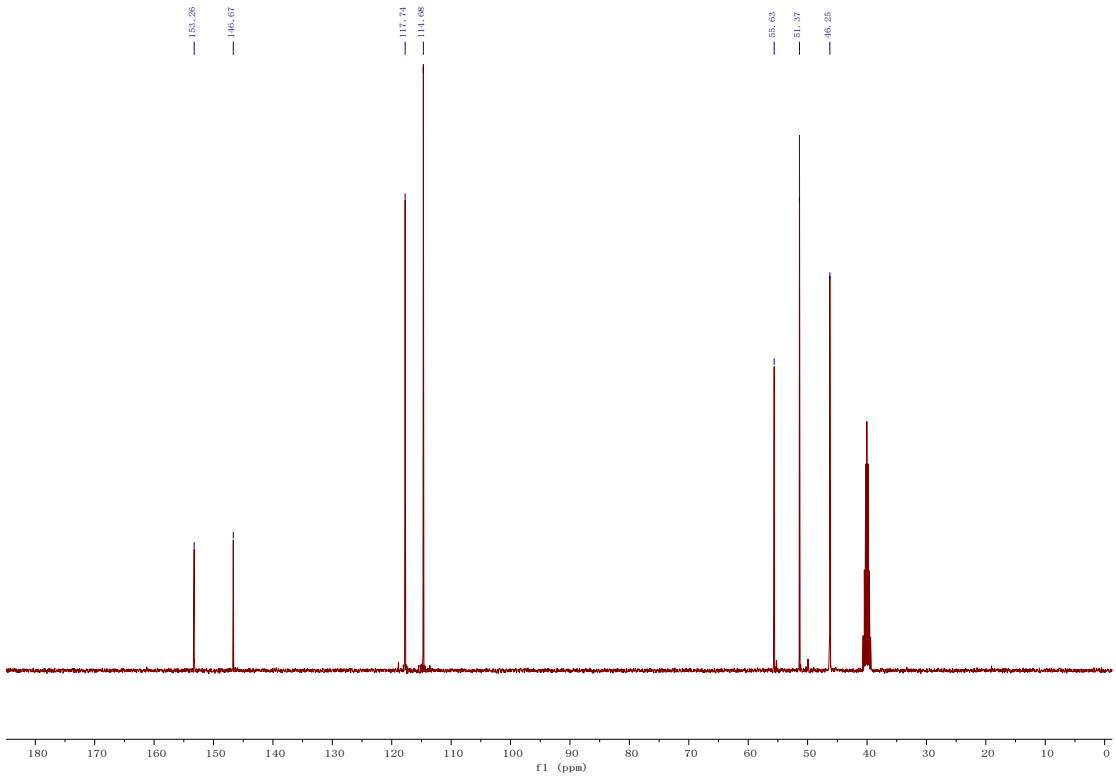

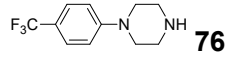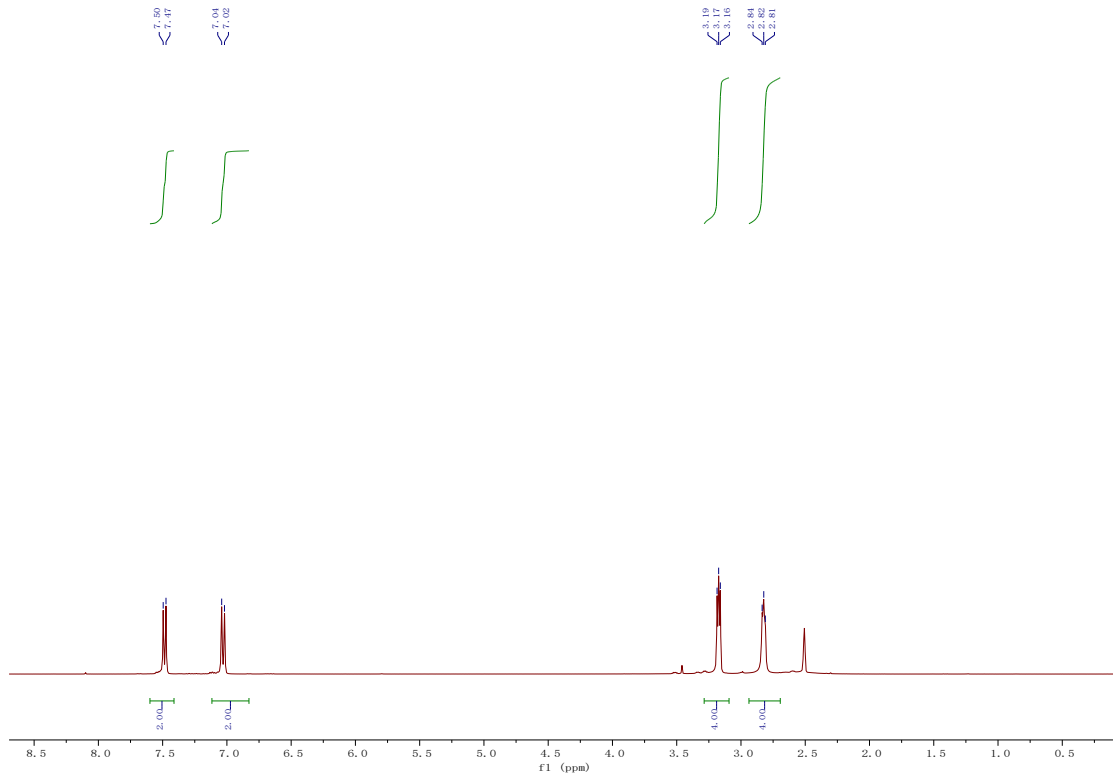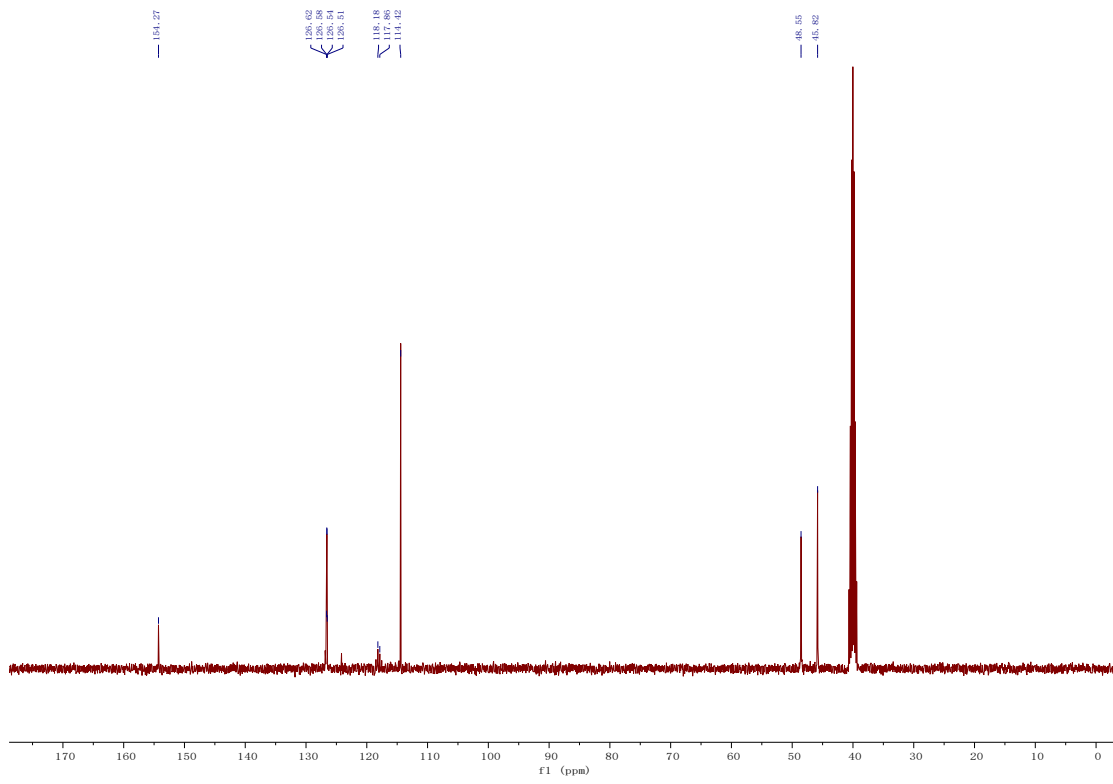

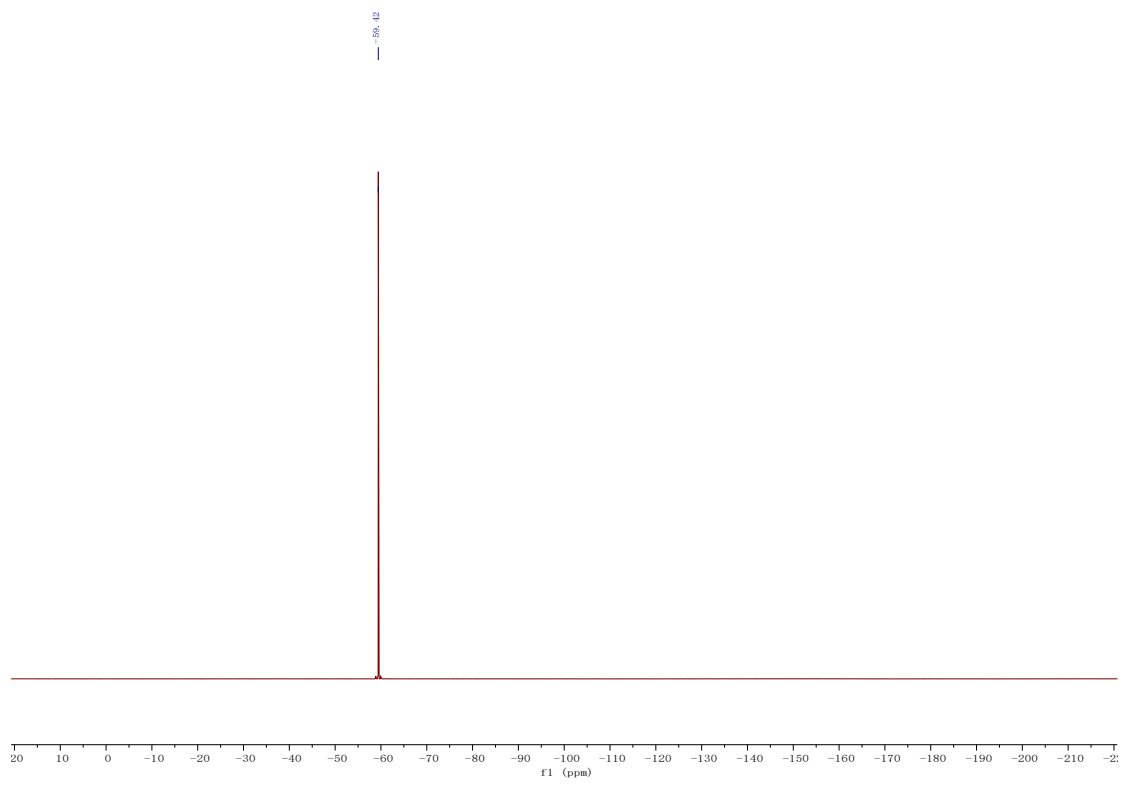

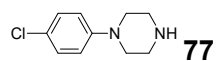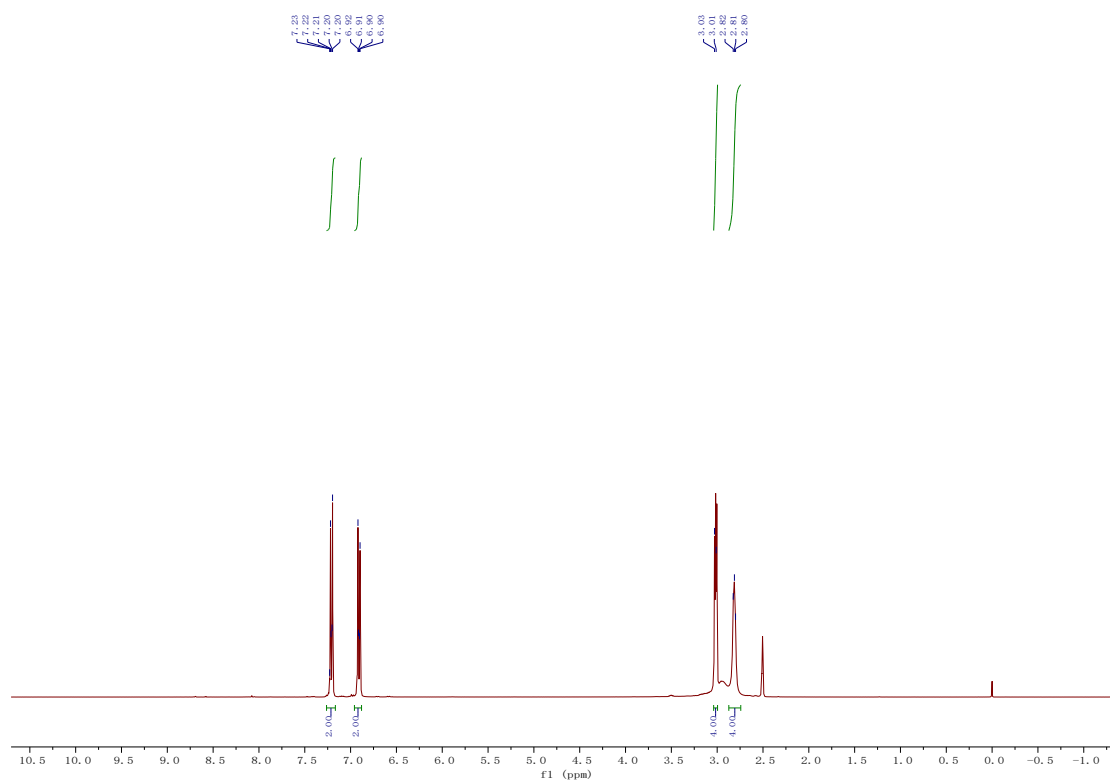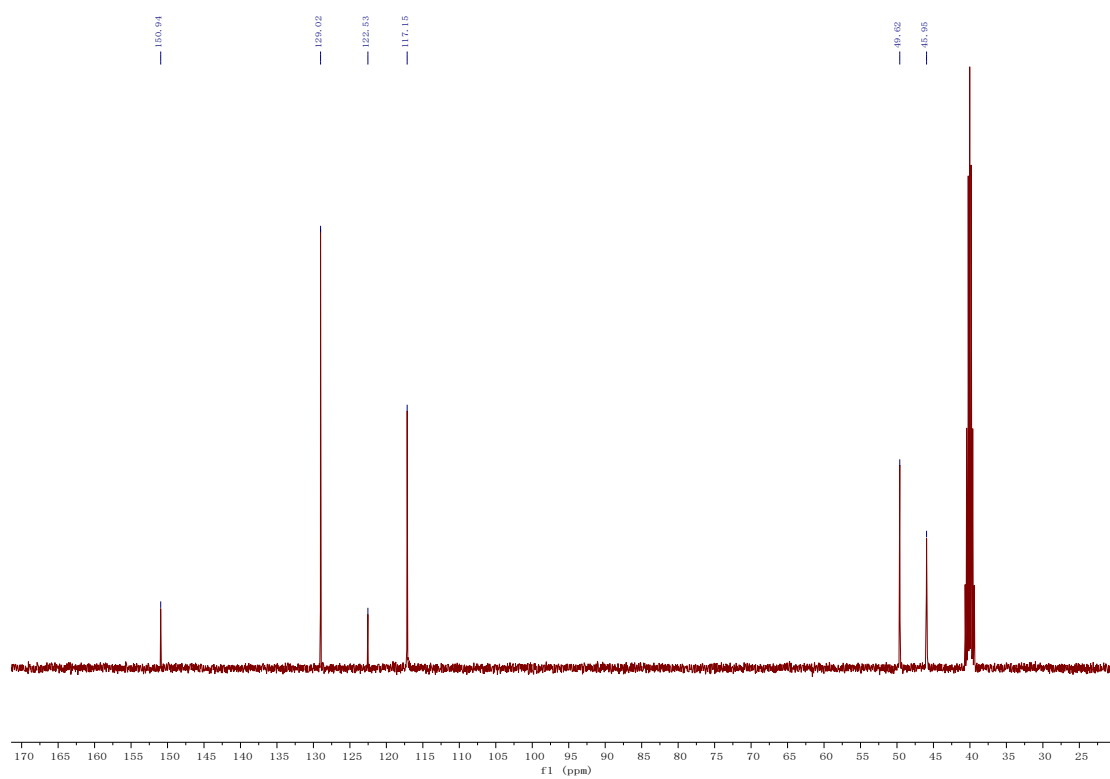

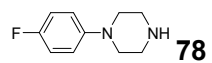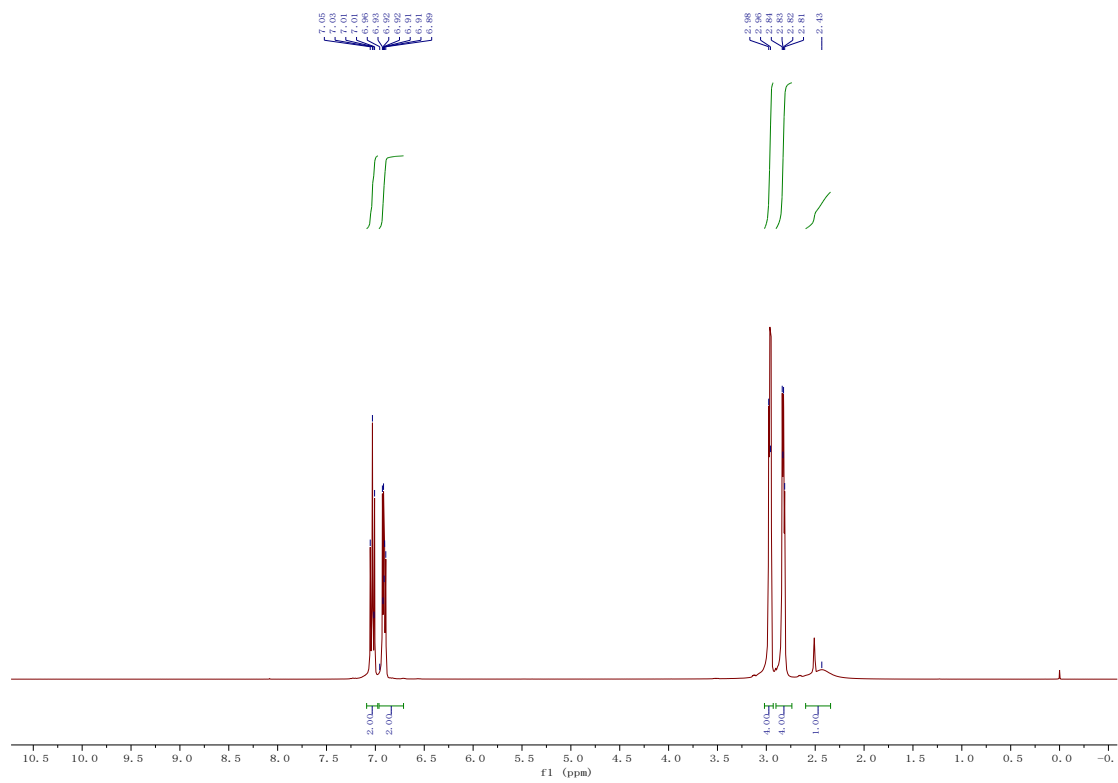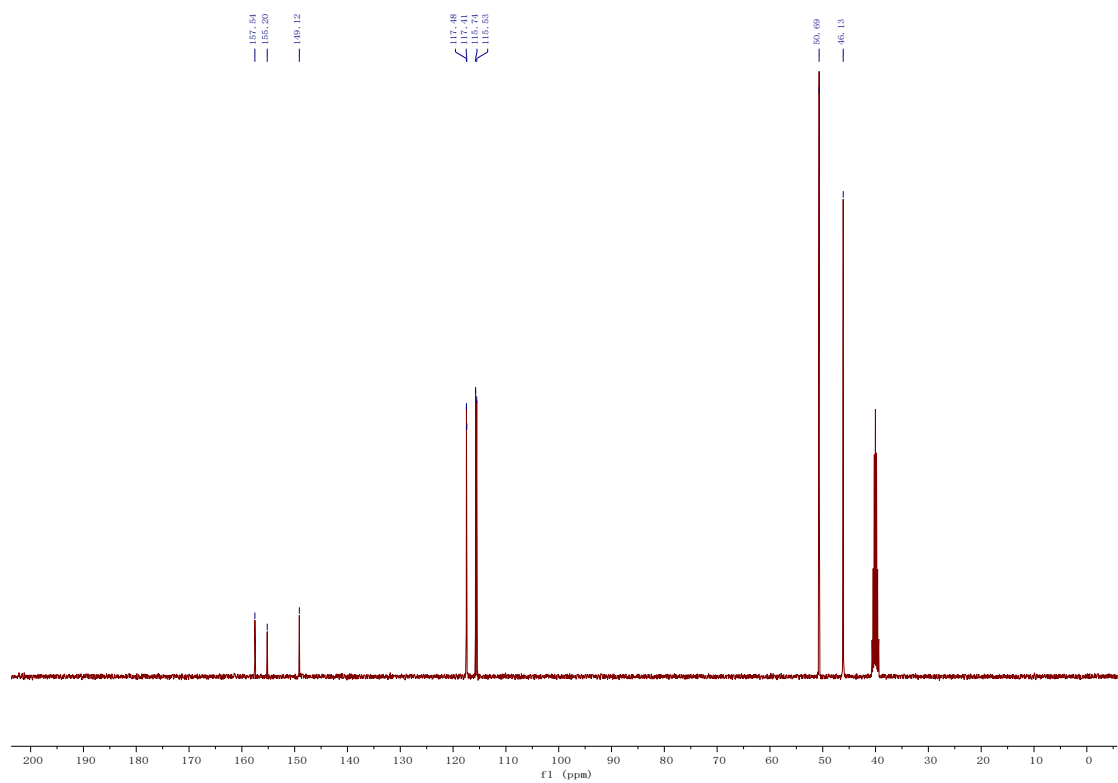

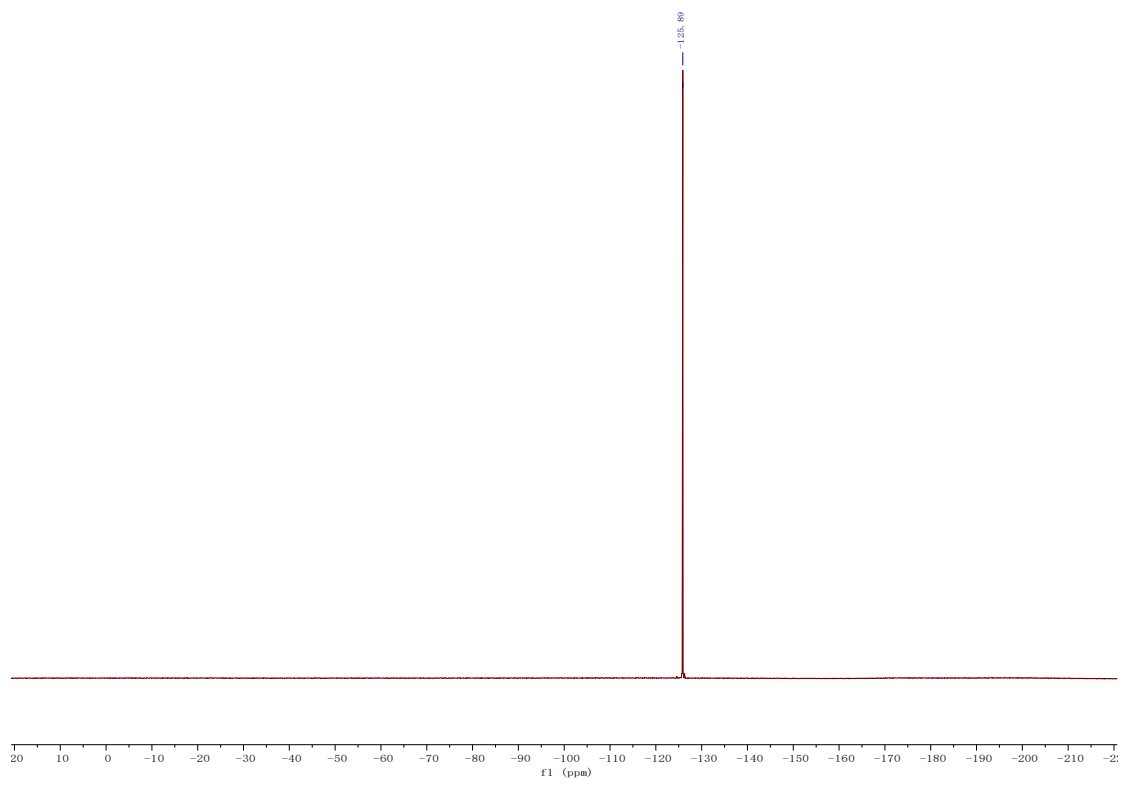



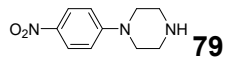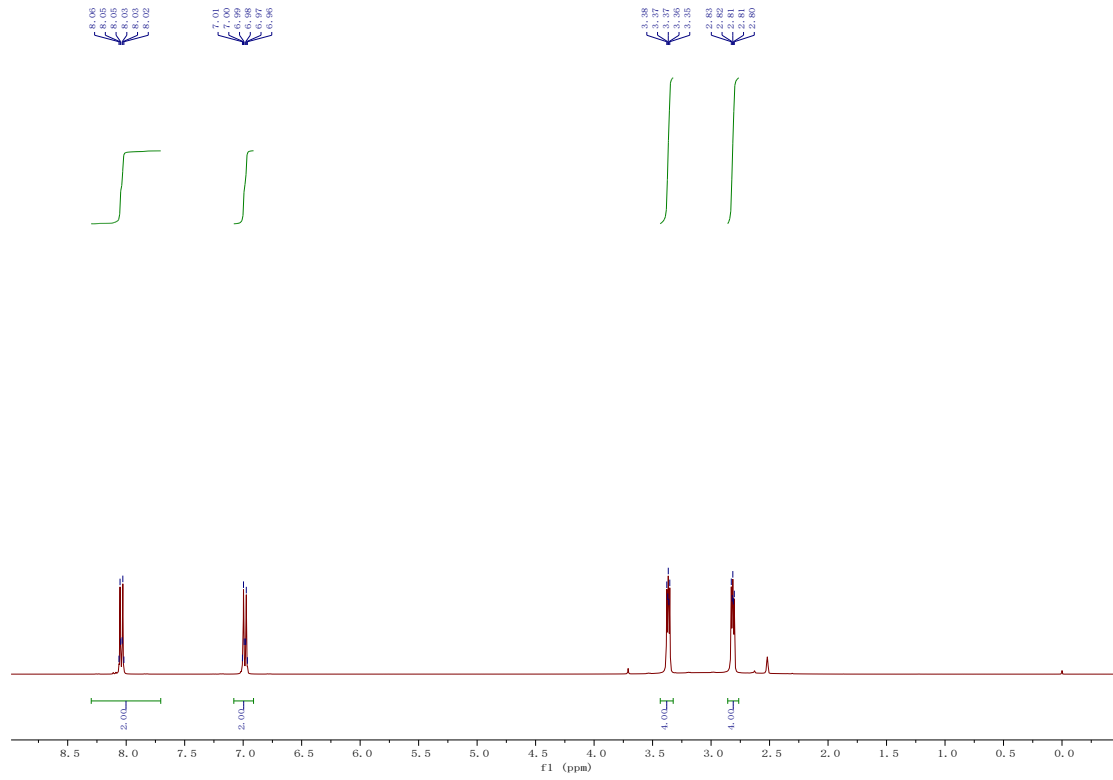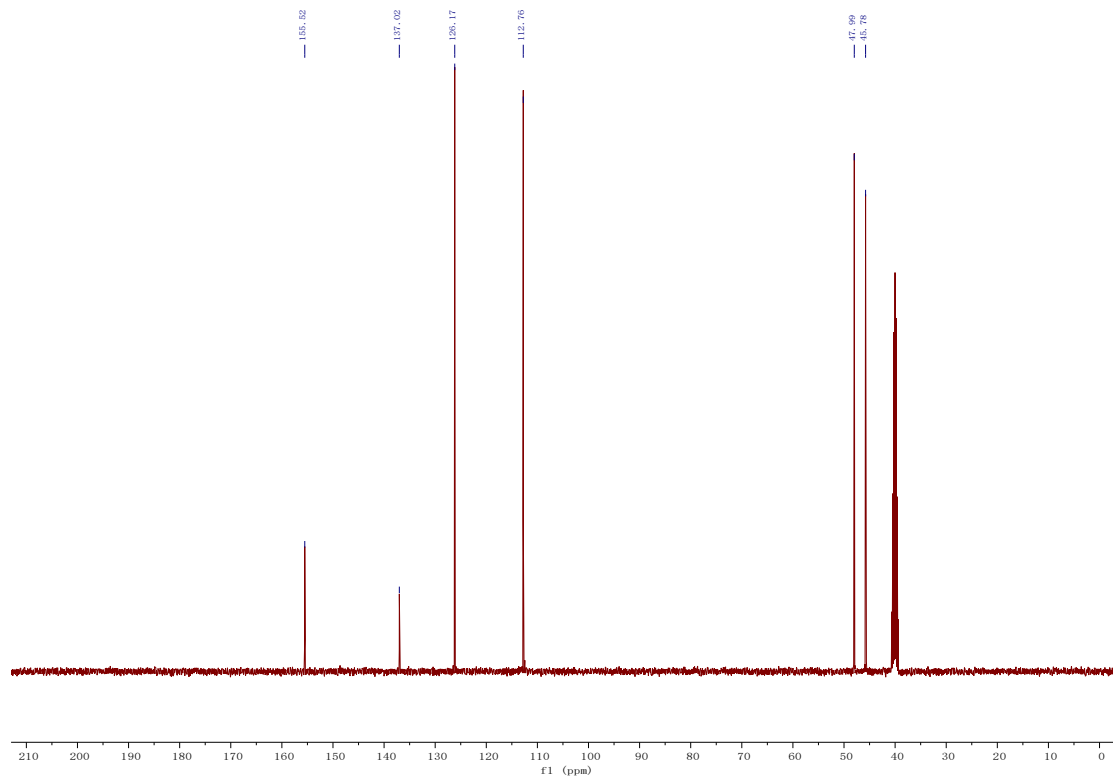

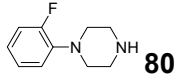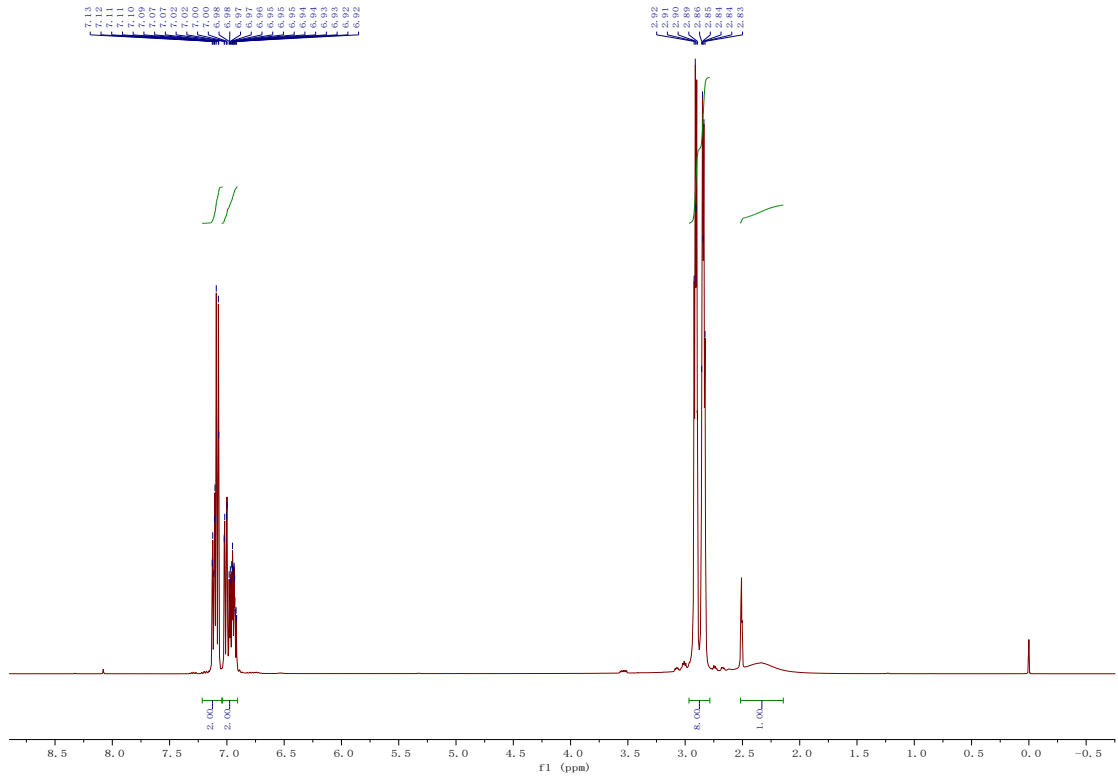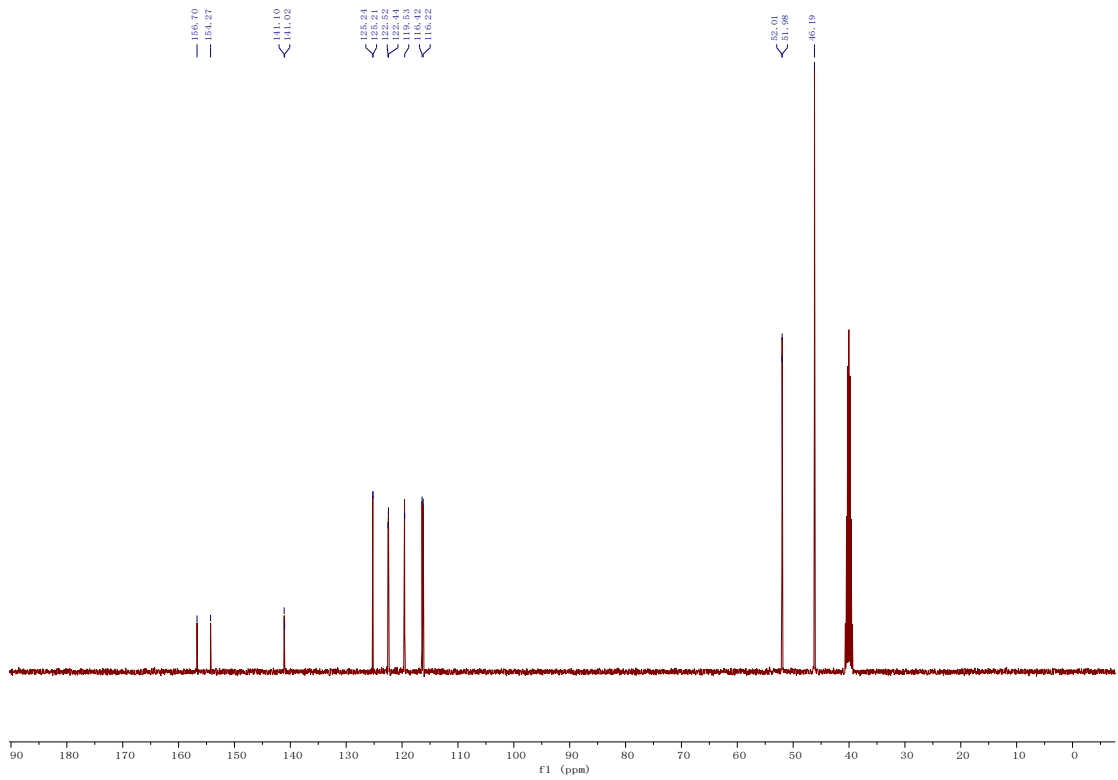

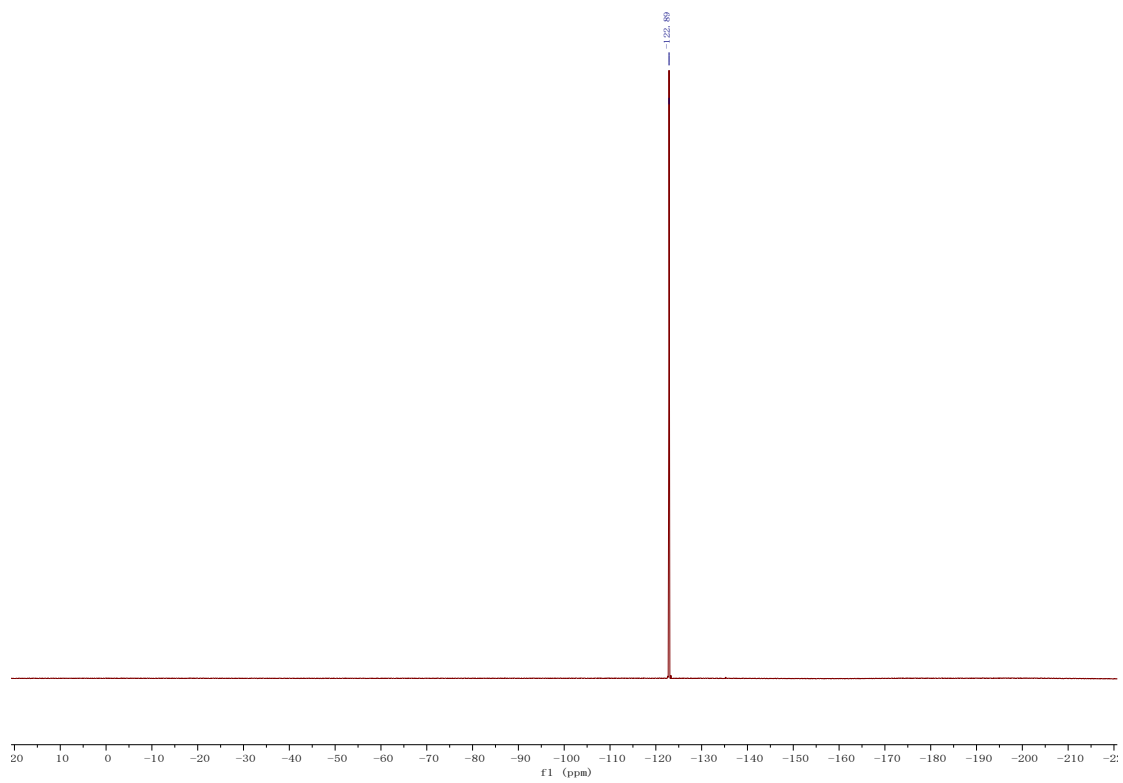

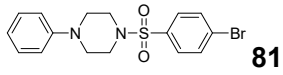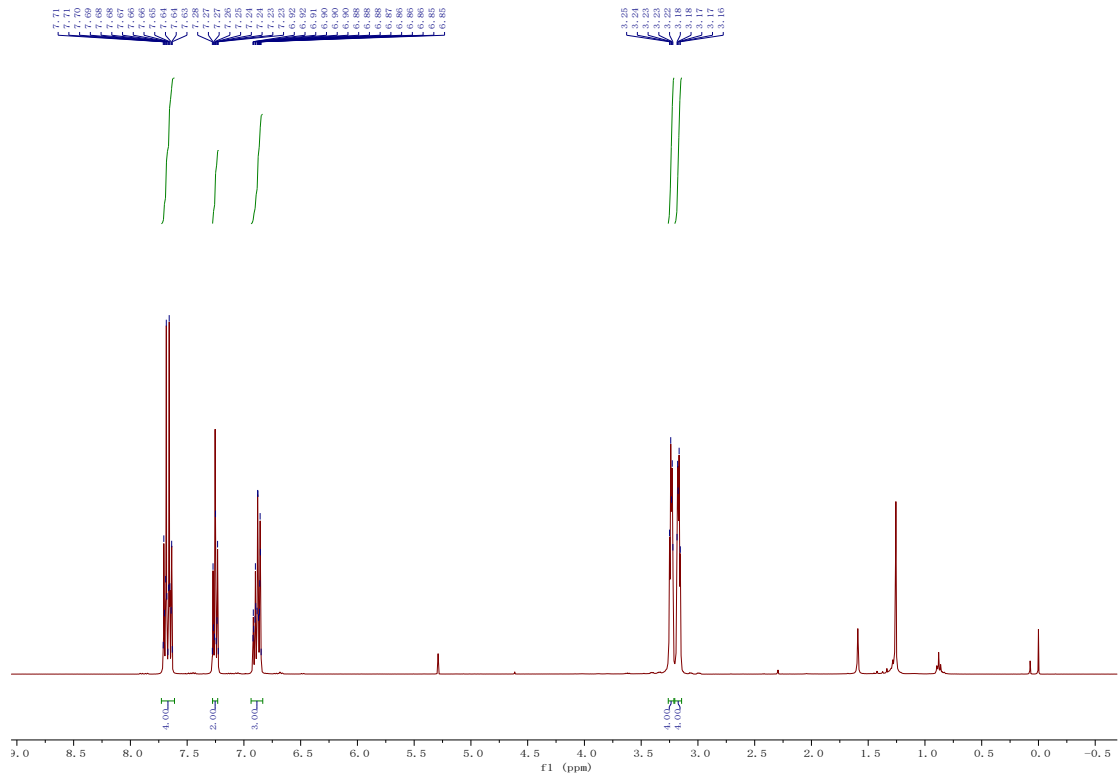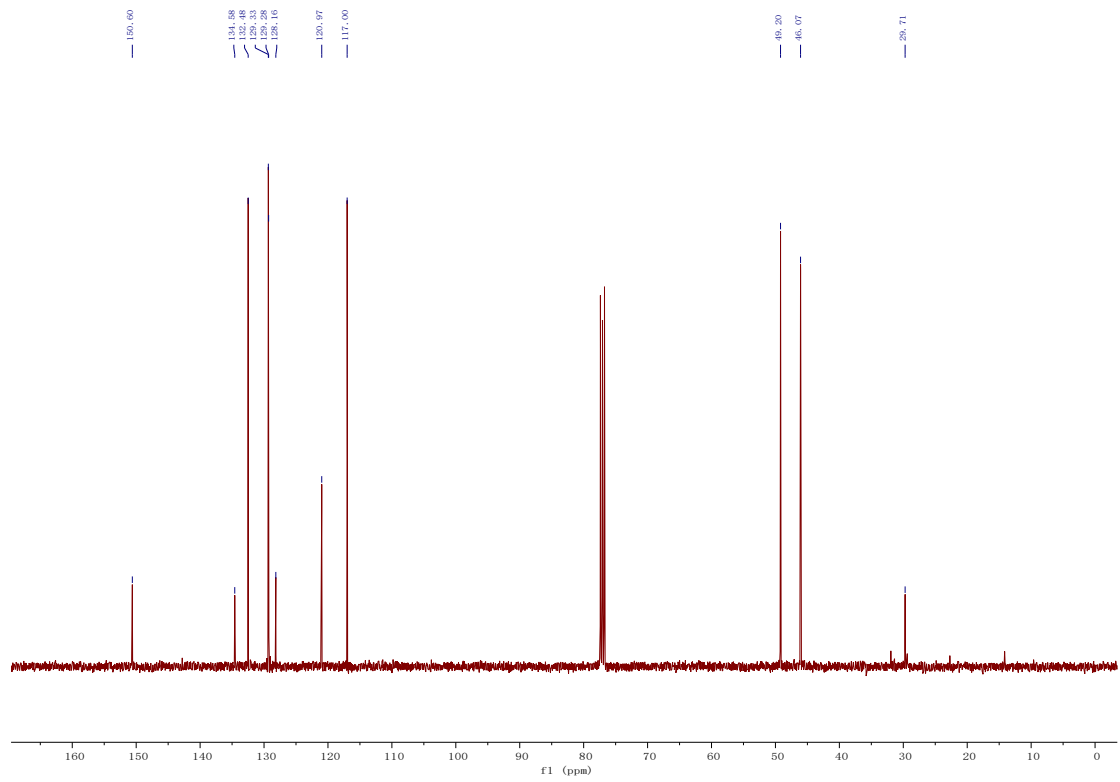



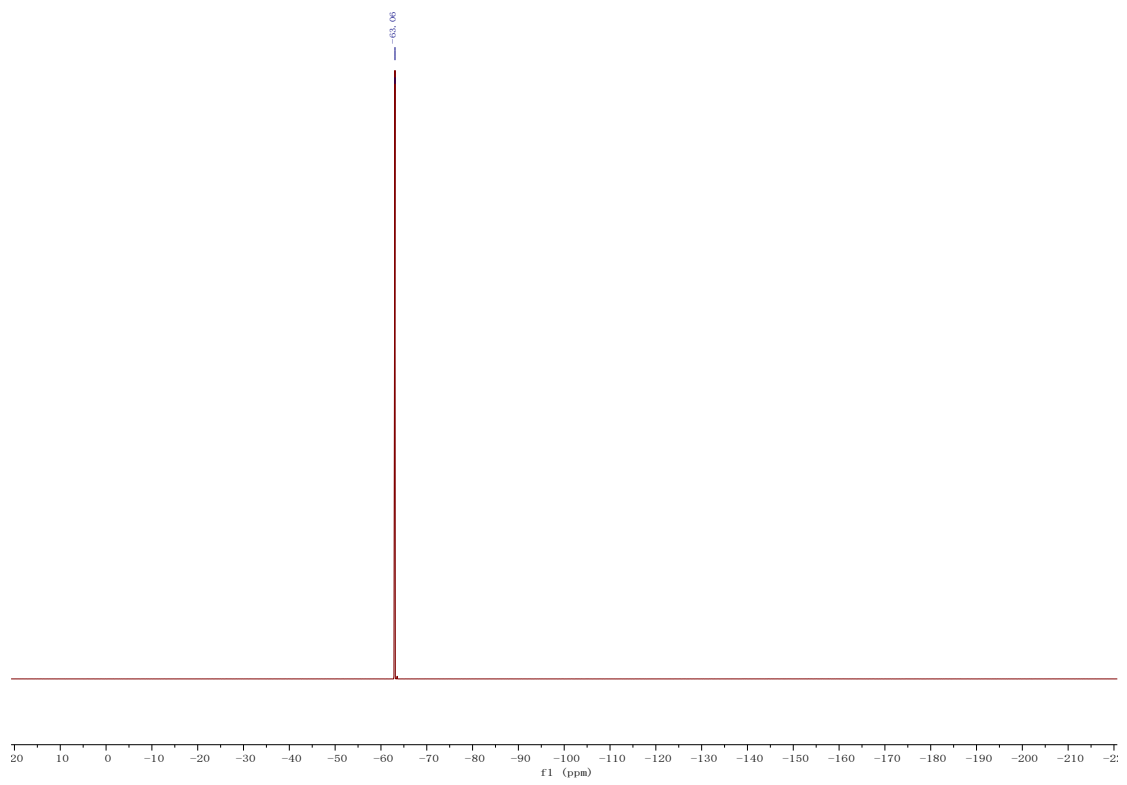

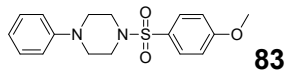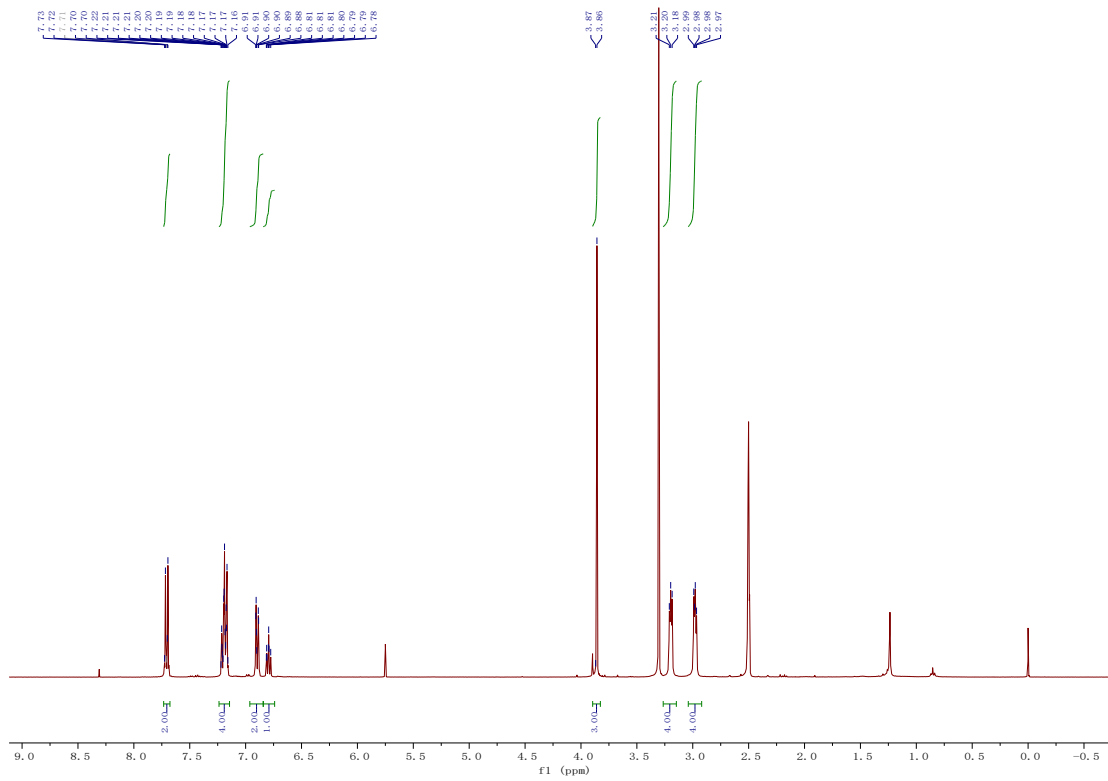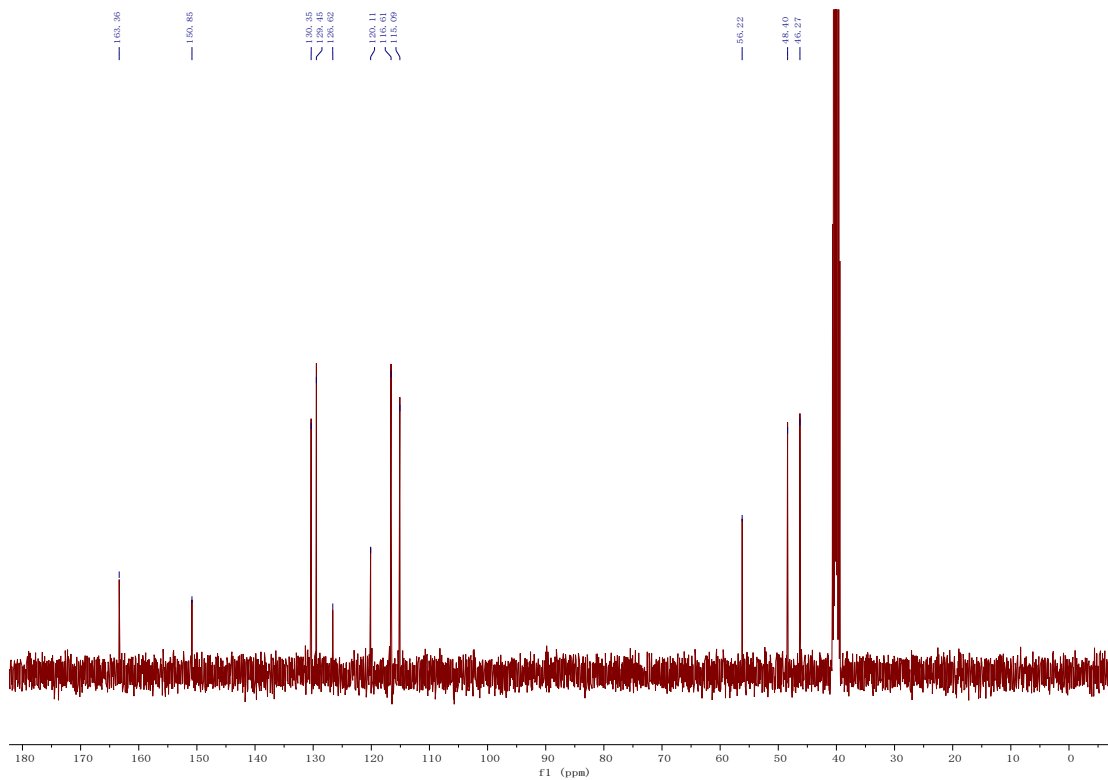





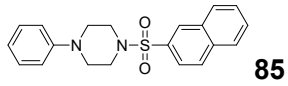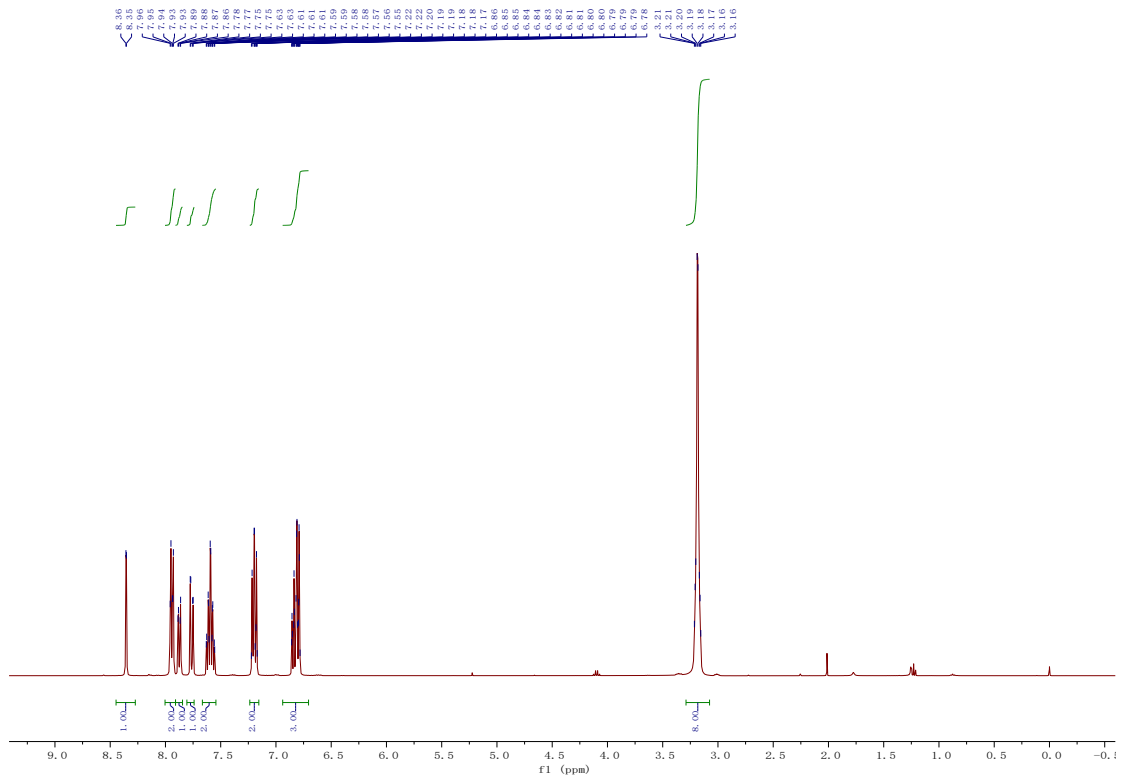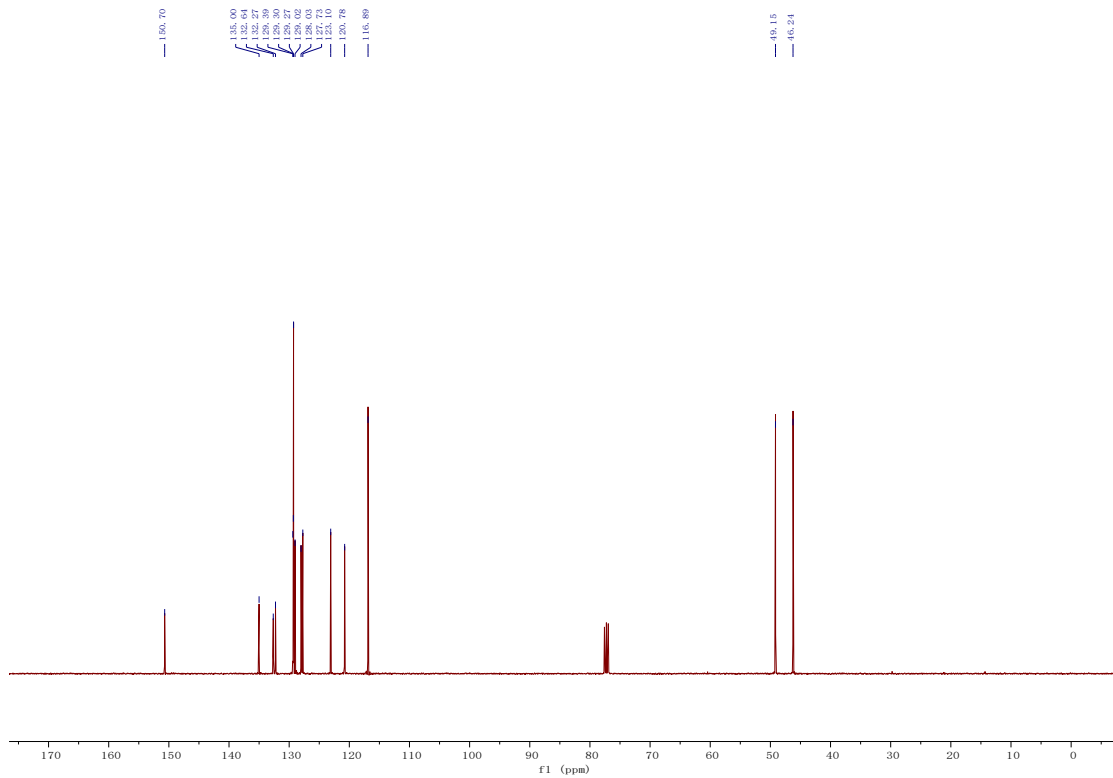

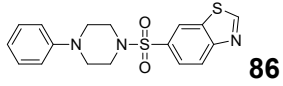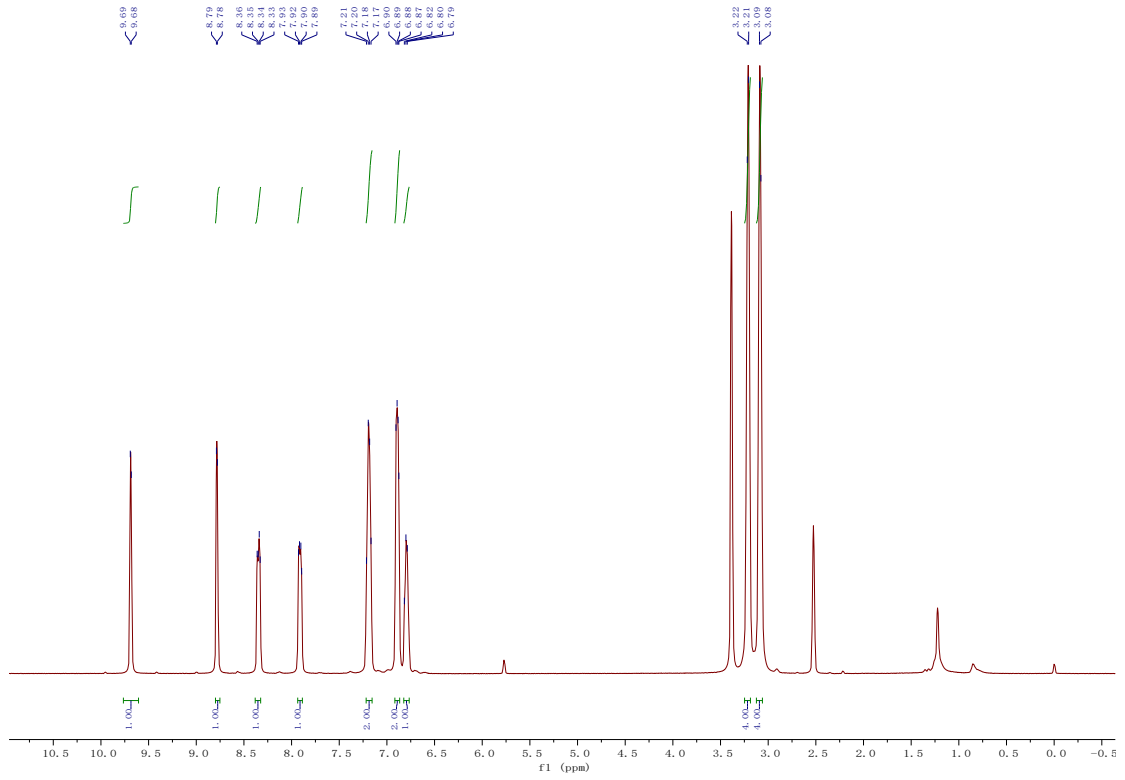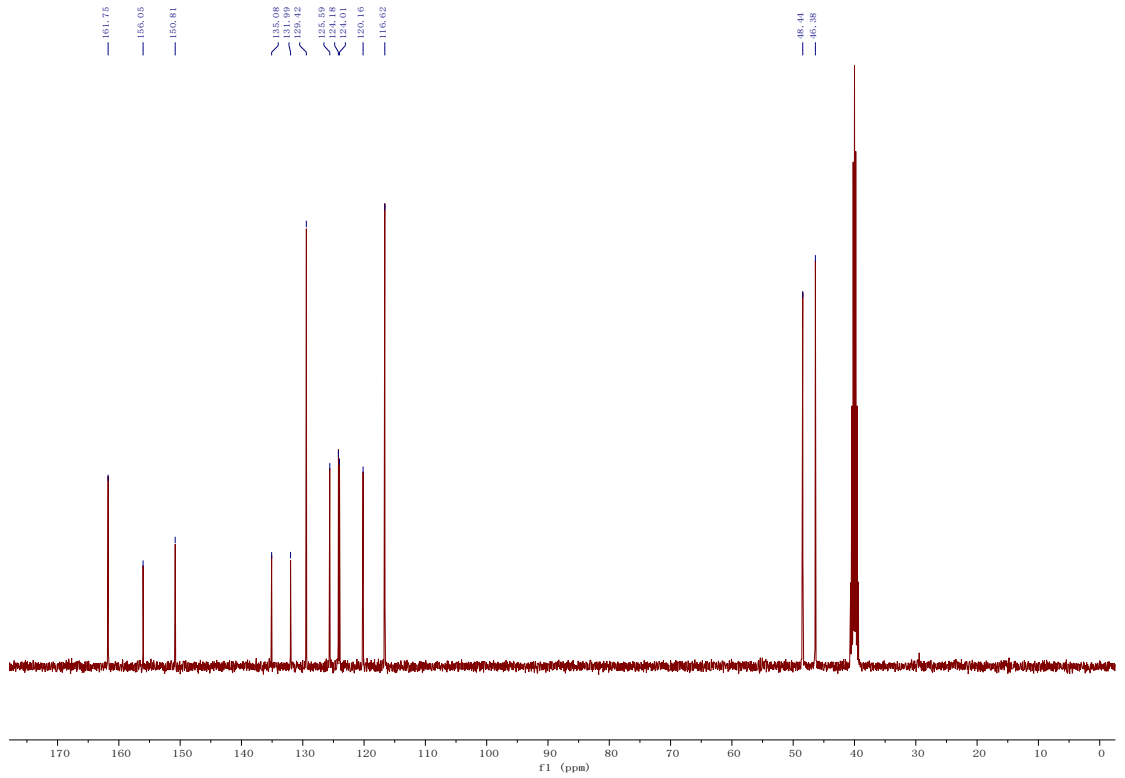

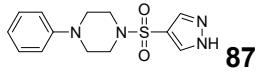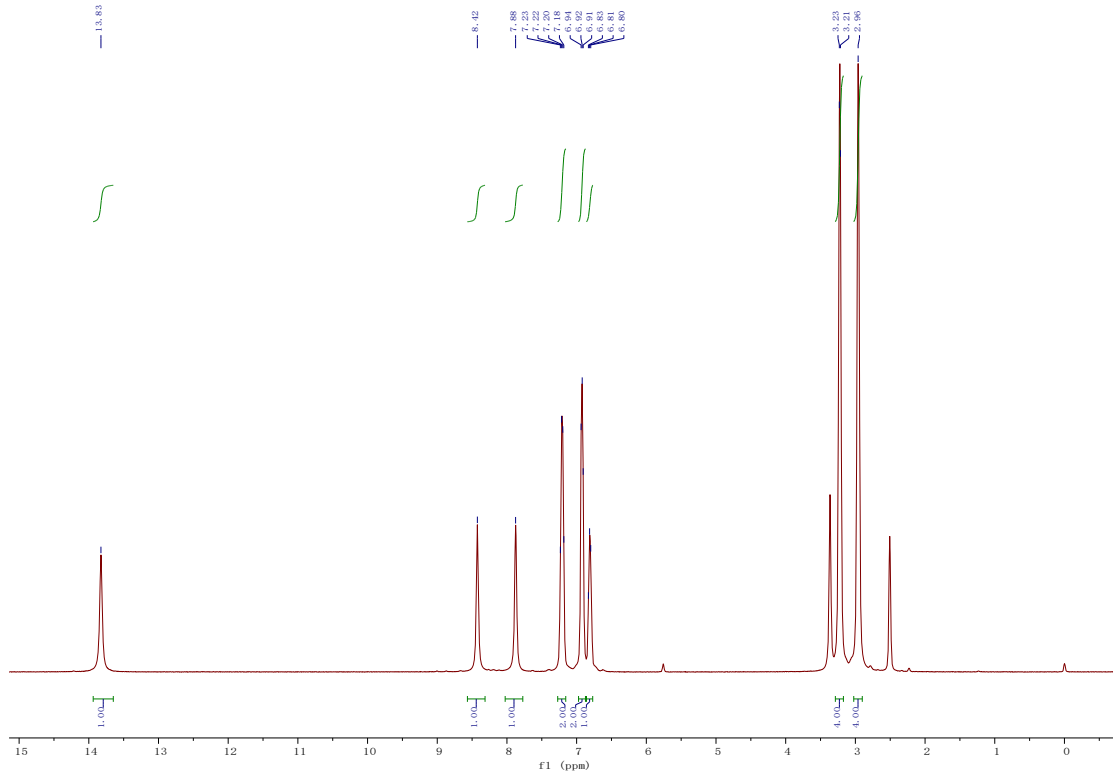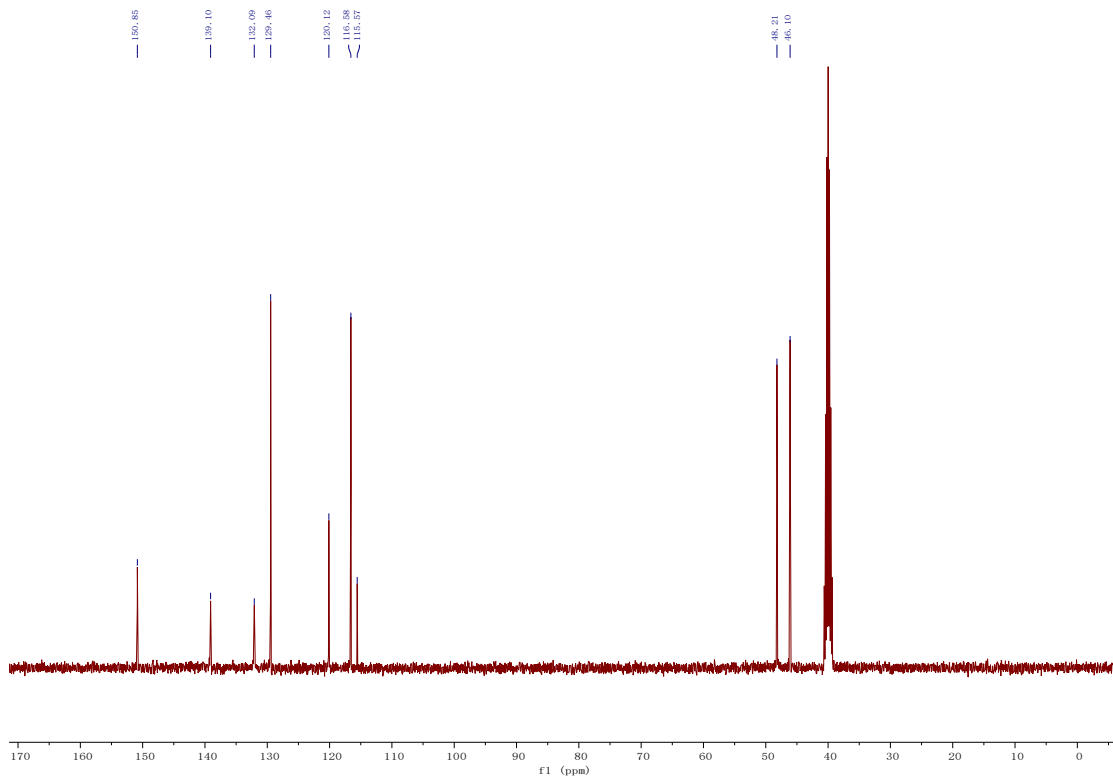

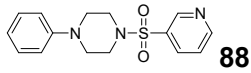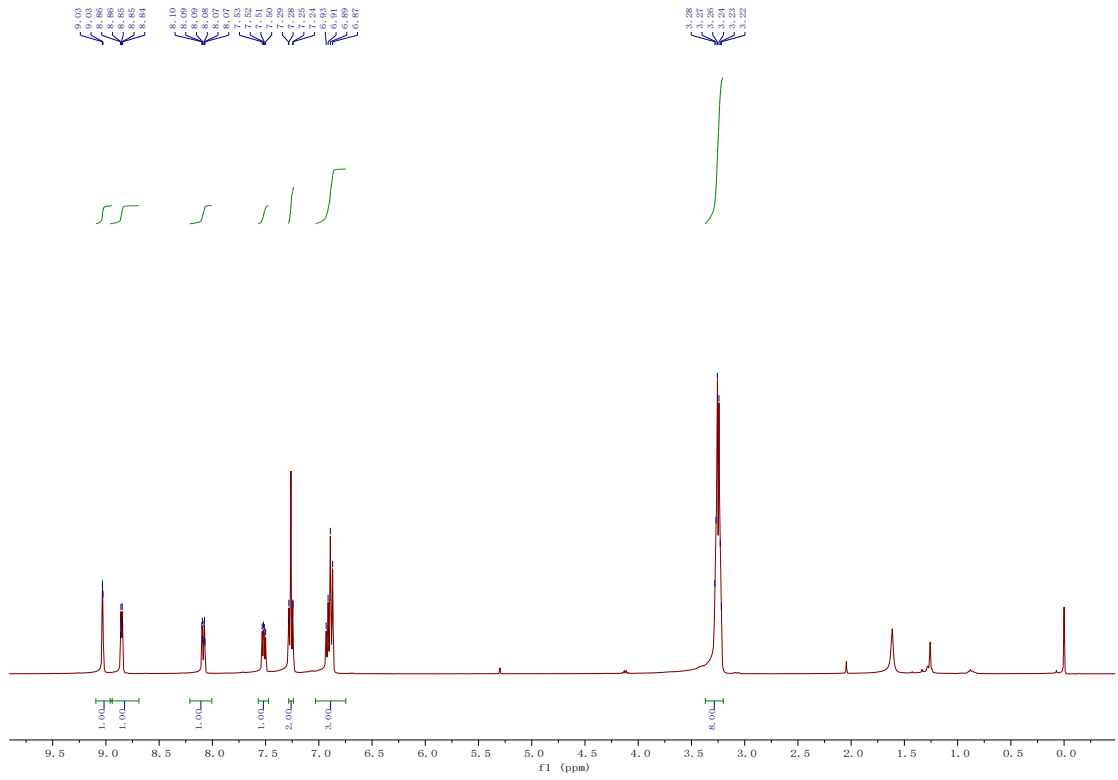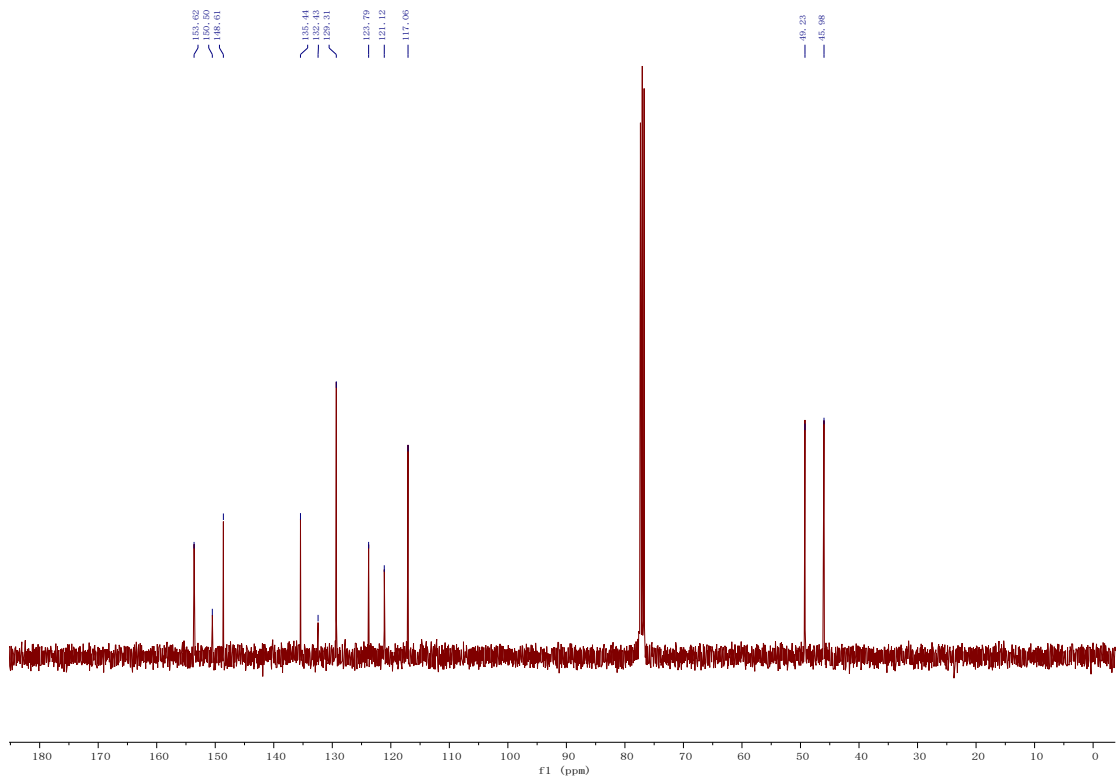

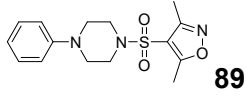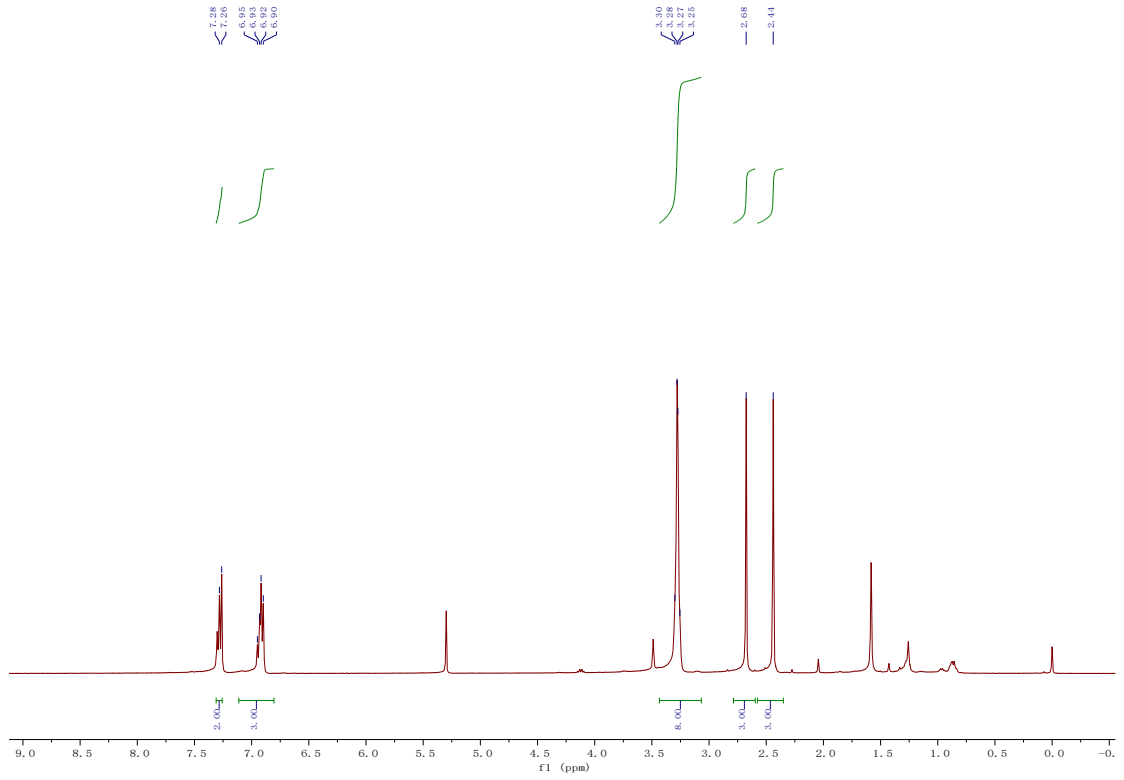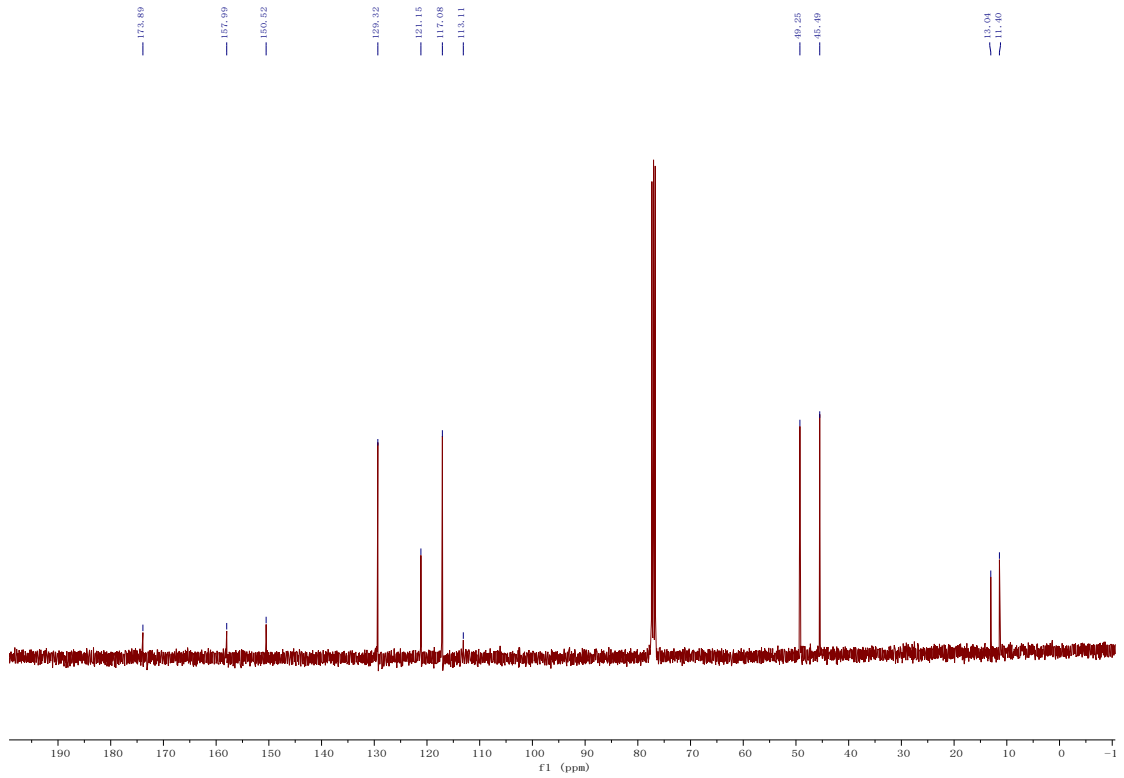

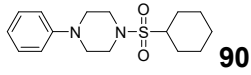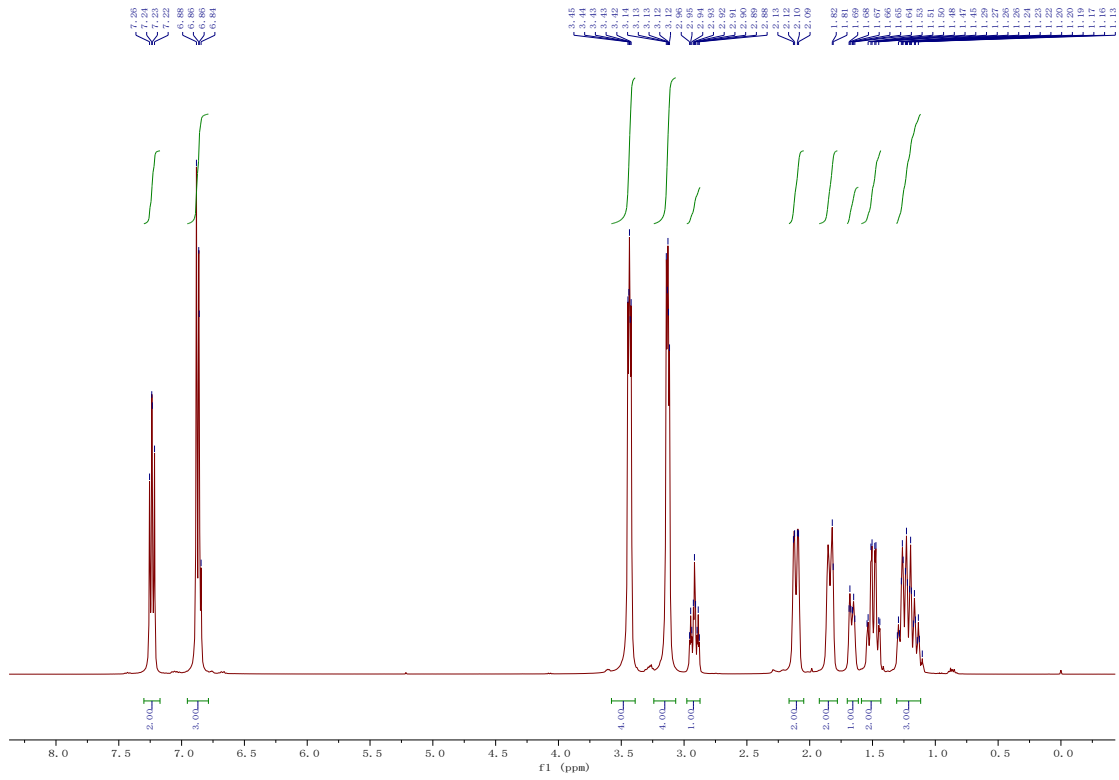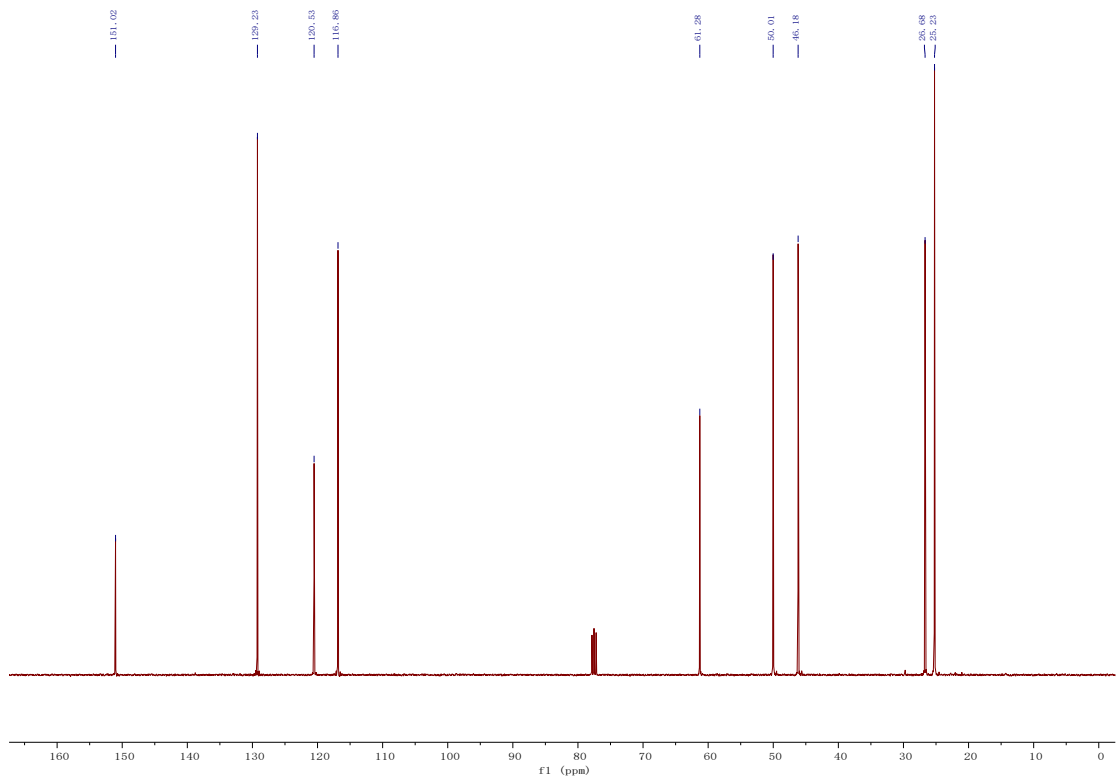

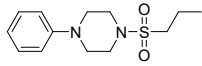

91

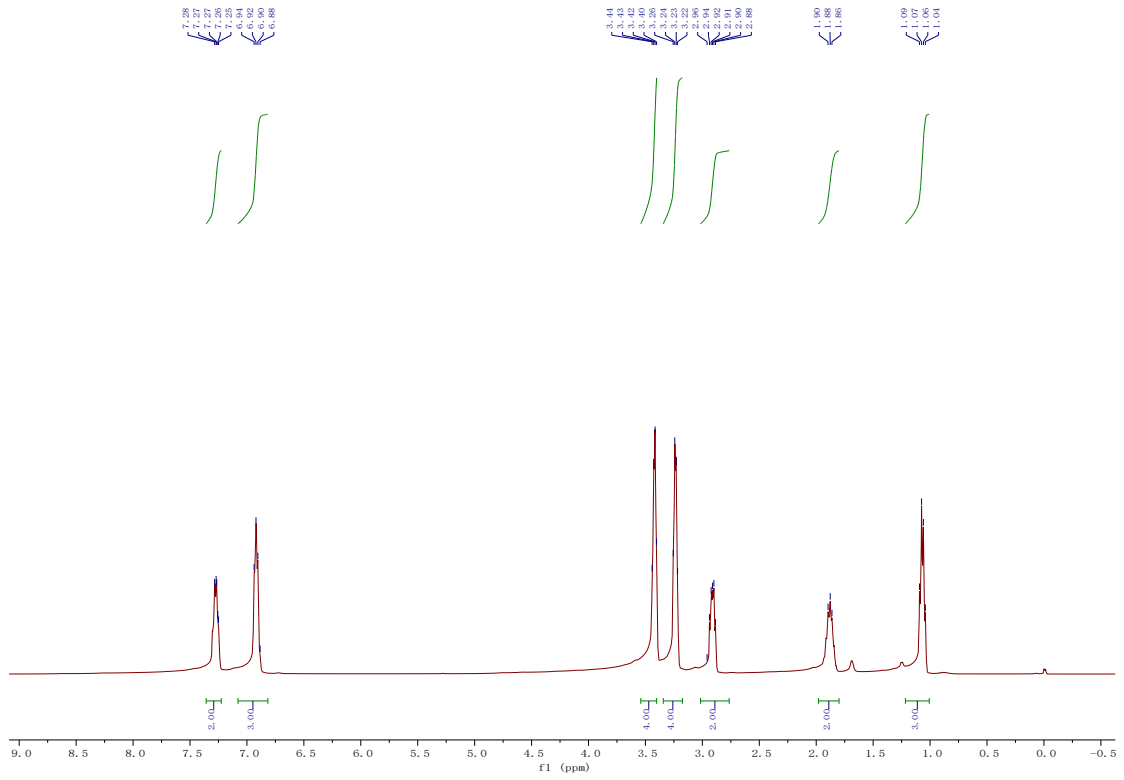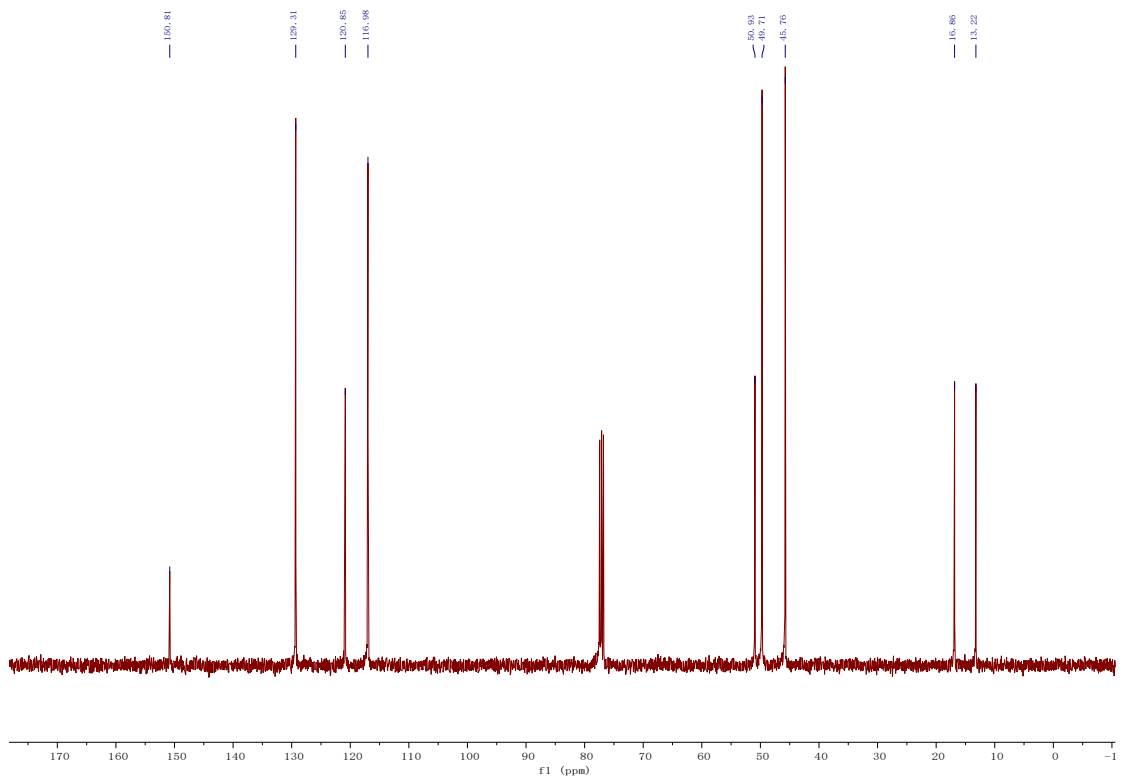

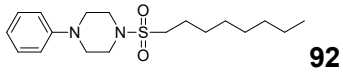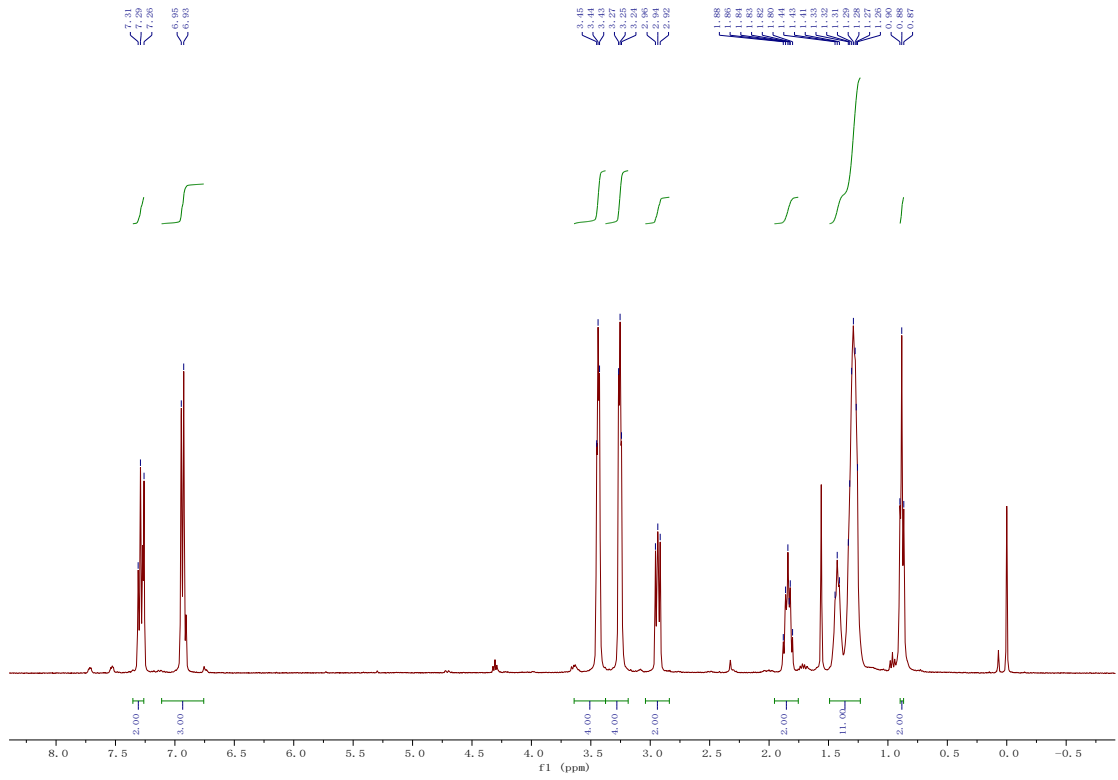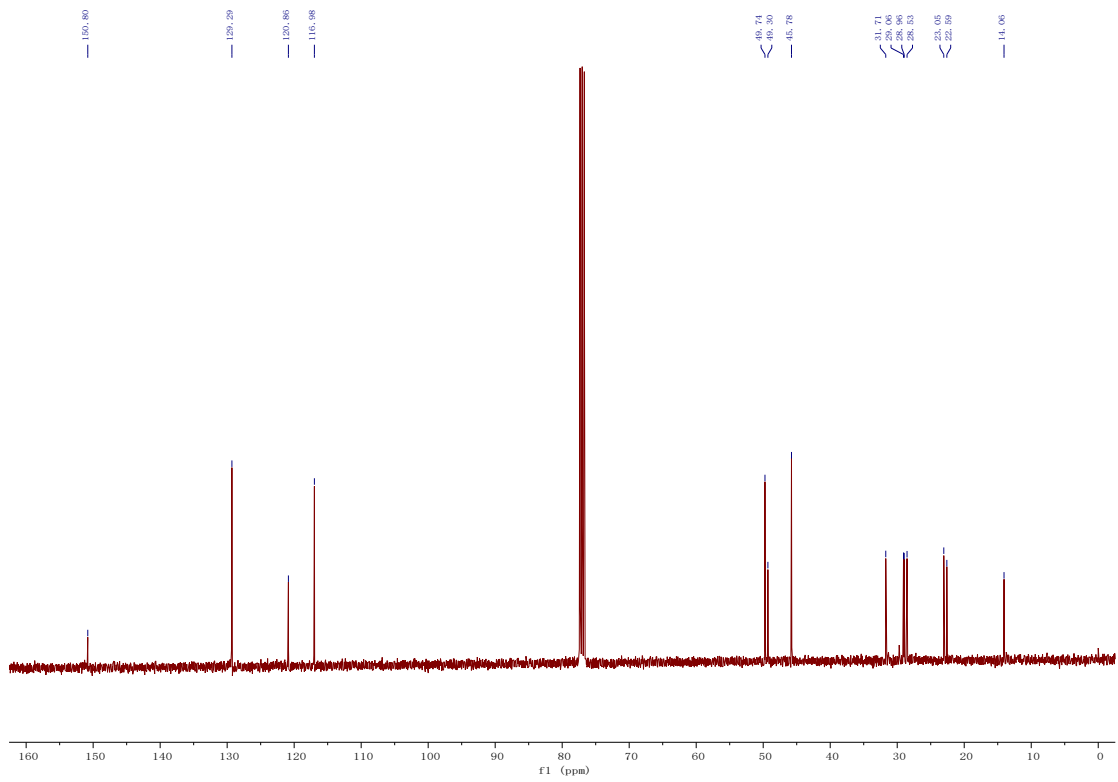



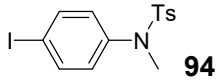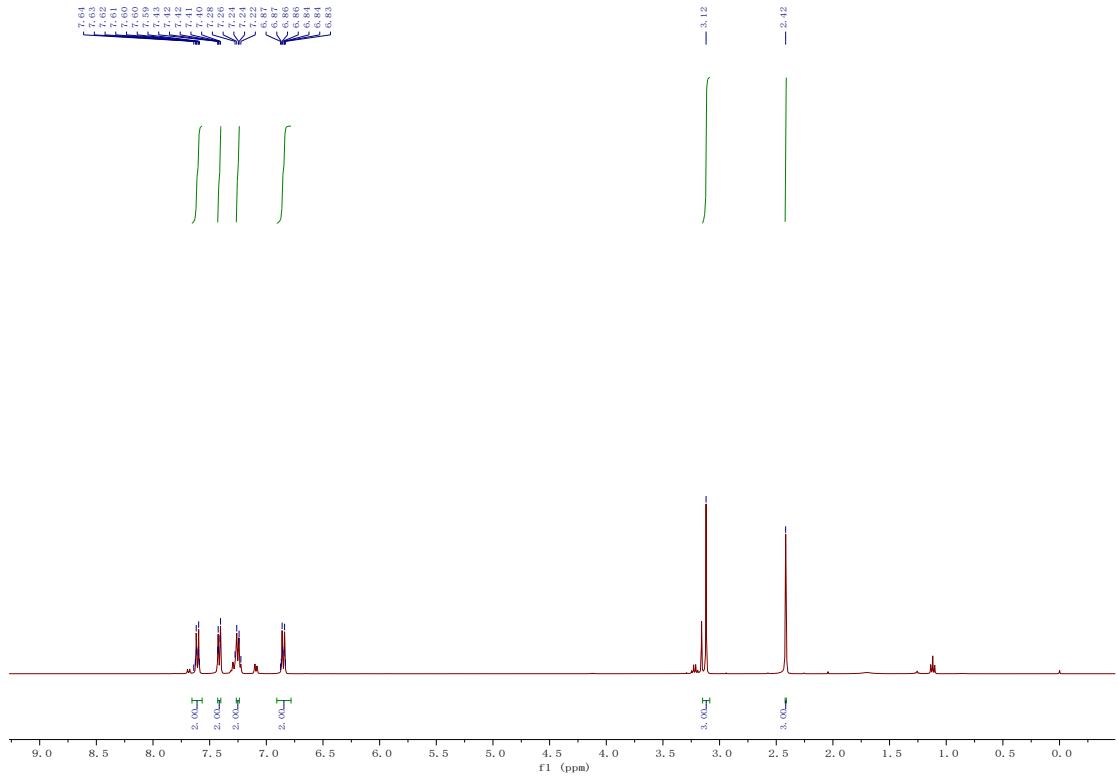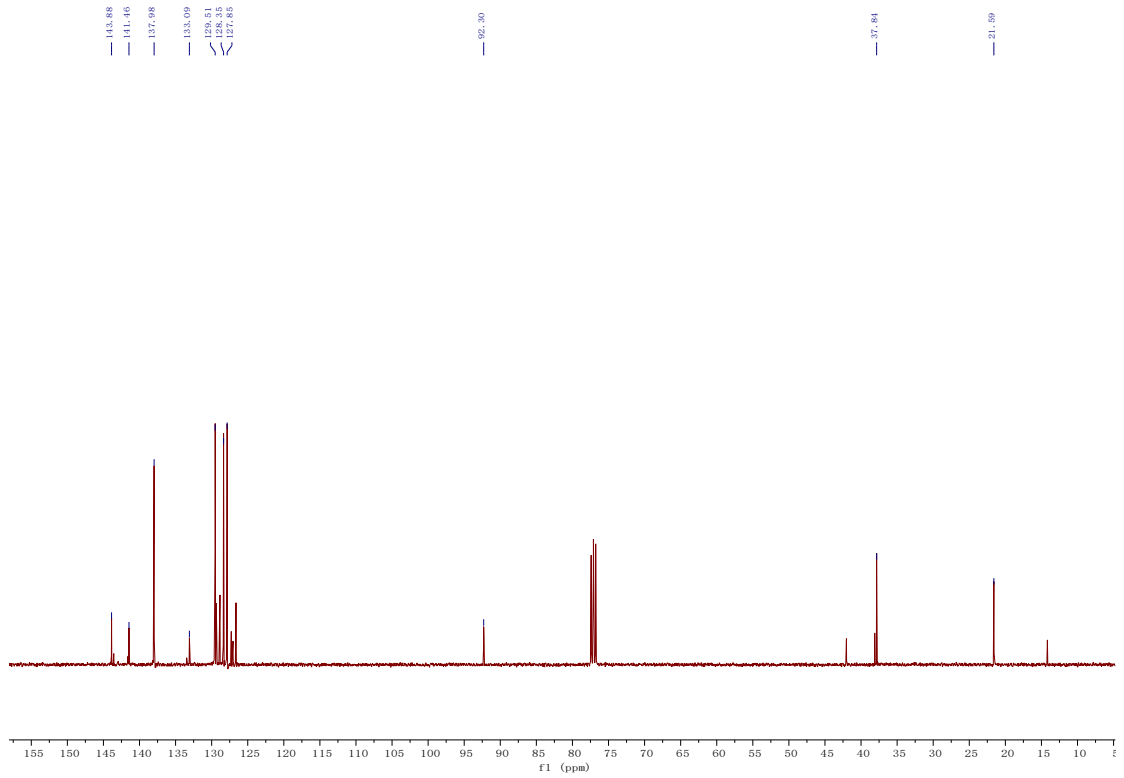

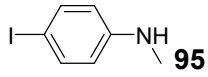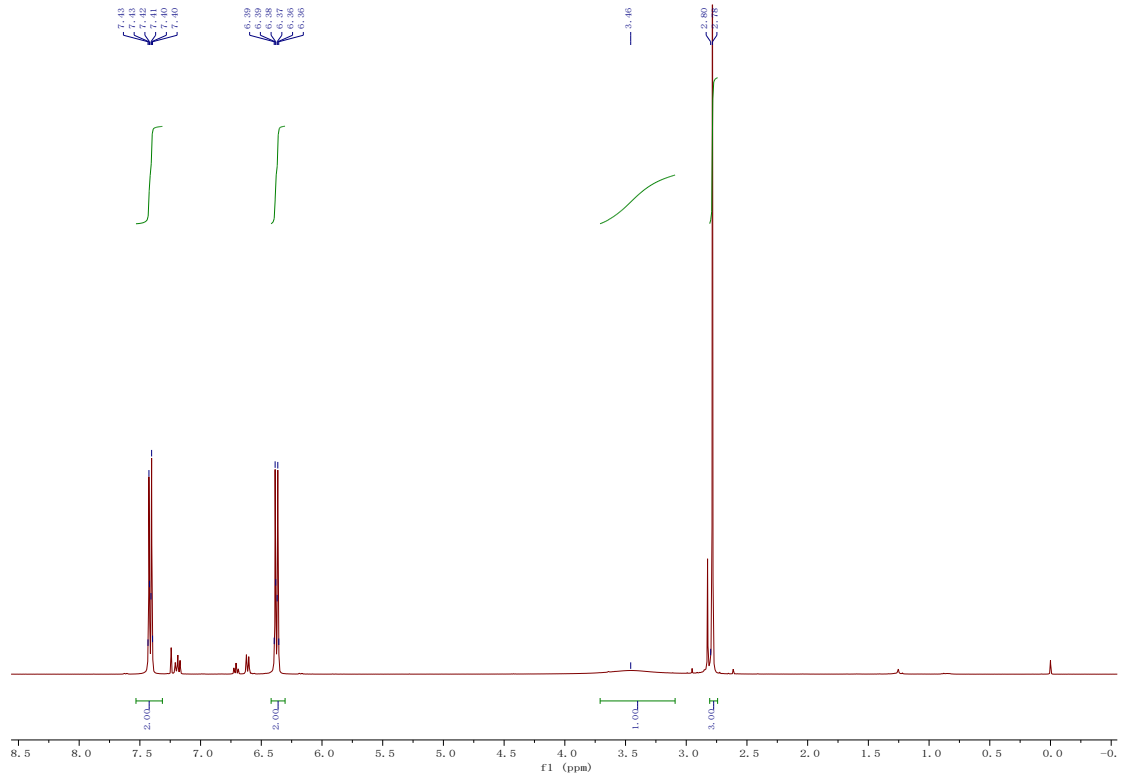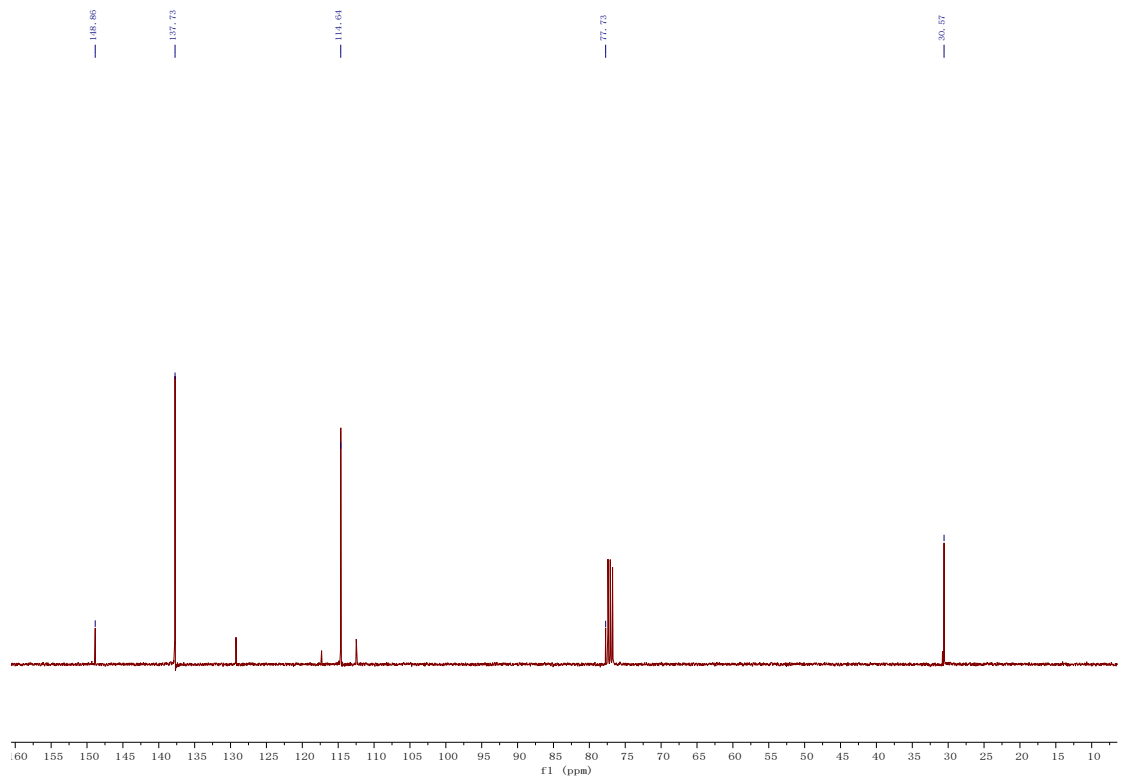

## 8. Deprotection of N-Ts-L-Proline causes racemization of product.

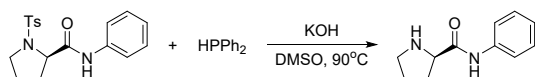

Scheme S1. Deprotection of N-Ts-L-Proline causes racemization of product

脱Ts-消旋 (1ml min, 20%IPA, OD-H) 002-(UV-ch1-254)

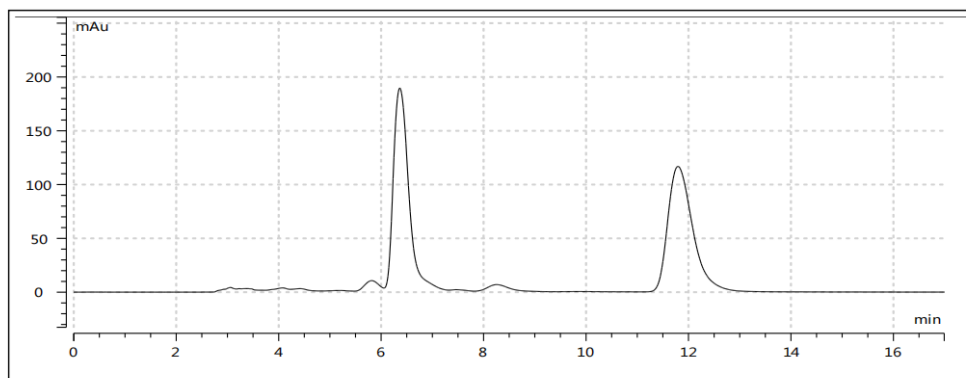

峰列表

| No | 名称    | 保留时间 (min) | 峰面积 (mAu*s) | 峰宽 (min) | 半峰宽 (min) | 峰高 (mAu) | 面积百分比 (%) | 峰类型 |
|----|-------|------------|-------------|----------|-----------|----------|-----------|-----|
| 1  | N. A. | 6.364      | 3803.60278  | 0.501    | 0.310     | 186.456  | 49.552    | BB  |
| 2  | N. A. | 11.795     | 3872.33419  | 0.847    | 0.507     | 116.172  | 50.448    | BB  |
| 3  | 总计    |            |             |          |           |          |           |     |

脱Ts-R (1ml min, 20%IPA, OD-H) 005-(UV-ch1-254)

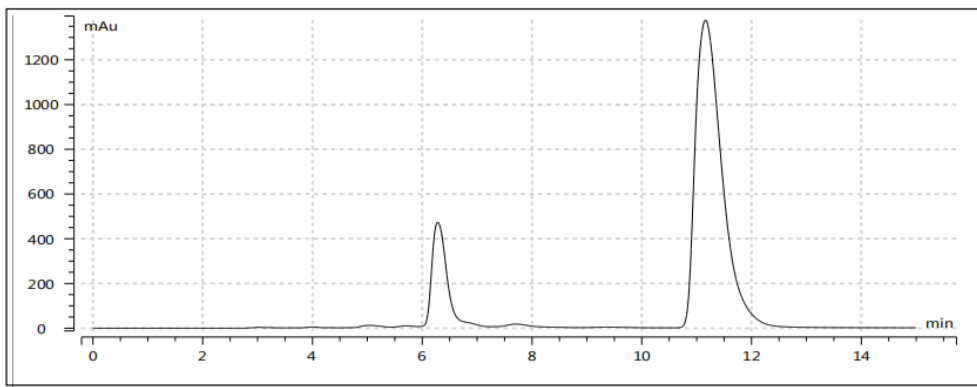

峰列表

| No | 名称    | 保留时间 (min) | 峰面积 (mAu*s) | 峰宽 (min) | 半峰宽 (min) | 峰高 (mAu) | 面积百分比 (%) | 峰类型 |
|----|-------|------------|-------------|----------|-----------|----------|-----------|-----|
| 1  | N. A. | 6.283      | 7368.11625  | 0.434    | 0.271     | 443.296  | 13.690    | BB  |
| 2  | N. A. | 11.162     | 46454.16828 | 0.839    | 0.513     | 1375.966 | 86.310    | BB  |
| 3  | 总计    |            |             |          |           |          |           |     |

Figure S3. Chiral HPLC analysis determines the ee value of product.

## 9. Controlled reactions for mechanism study.

Table S1. Controlled reactions for mechanism study.

| Entry | Additive       | Yield | Compound <b>93</b> |
|-------|----------------|-------|--------------------|
| 1     | TEMPO (1.1 eq) | 68%   | Detected by HRMS   |
| 2     | TEMPO (4.0 eq) | 0%    | Detected by HRMS   |

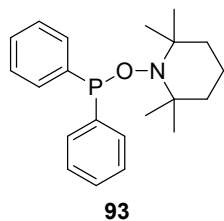

HRMS (ESI) calculated for C<sub>11</sub>H<sub>29</sub>NOP<sup>+</sup> [M+H]<sup>+</sup>: 342.1909, found 342.1967.

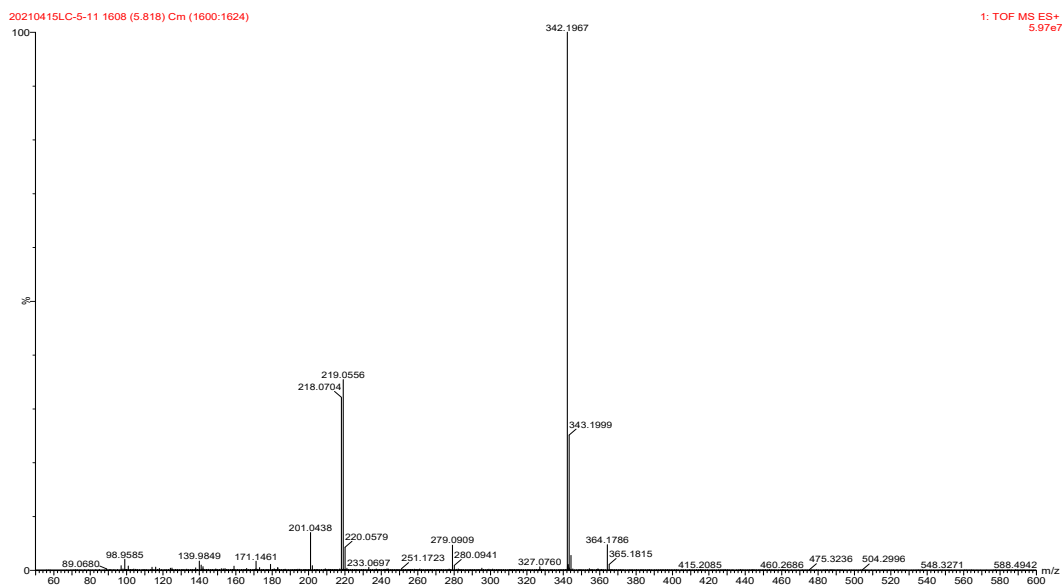

Figure S4. HRMS analysis of TEMPO additive product.
